# Supplementary material for: Uncovering drug targets for cluster headache through proteome-wide Mendelian randomization analysis
Source: Springer Nature journal article supplement (doi:10.1186/s10194-025-01999-0), 2025-03-20
Supplement: MOESM5 [file 10194_2025_1999_MOESM5_ESM.xlsx]

## Sheet: ANGPTL3
Table S3. Phenome-wide MR results for Cluster headache.
Bonferroni correction pval < 3.20E-06 (0.05/1421/11)
ANGPTL3
Diseases	method	nsnp	b	se	pval
finngen_R8_M13_ARTHTROSIS_COX_PRIM_HIPSURG	IVW	4	-0.185275	0.0065739	9.31986e-175
finngen_R8_SLE_FG	IVW	4	0.345636	0.0189113	1.26898e-74
finngen_R8_H7_SCLERACORNEA	IVW	4	-0.028693	0.00171689	1.06722e-62
finngen_R8_N14_OTHNONINFOVA	IVW	4	-0.107067	0.00846662	1.18034e-36
finngen_R8_M13_PREPATELLARBURSITIS	IVW	4	0.0952361	0.00888956	8.82095e-27
finngen_R8_E4_OBESITYXTRMALV	IVW	4	-0.374541	0.0384244	1.89094e-22
finngen_R8_CD2_BENIGN_CHOROID	IVW	4	0.191943	0.0198481	4.01954e-22
finngen_R8_F5_MIXEDDEV	IVW	4	-0.447856	0.0486251	3.24974e-20
finngen_R8_I9_PERICARD	IVW	4	-0.480617	0.0547699	1.70595e-18
finngen_R8_RX_STATIN	IVW	4	0.252346	0.0292216	5.84337e-18
finngen_R8_I9_ABAORTANEUR	IVW	4	0.222279	0.0264561	4.39573e-17
finngen_R8_L12_LICHSIMPANDPRURIGO	IVW	4	-0.305122	0.0371714	2.23957e-16
finngen_R8_RX_PARACETAMOL_NSAID	IVW	4	-0.0446184	0.00573329	7.11891e-15
finngen_R8_KRA_PSY_HYPERKIN_EXMORE	IVW	4	-0.218423	0.0291928	7.31379e-14
finngen_R8_M13_ARTHTROSIS_COX	IVW	4	-0.132578	0.0183702	5.31443e-13
finngen_R8_SLE_STRICT	IVW	4	0.345326	0.0517464	2.49882e-11
finngen_R8_K11_DEEP_BITE_INCLAVO	IVW	4	0.257322	0.0412282	4.33682e-10
finngen_R8_KRA_PSY_ANYMENTAL_SUICID_PREG_NERV_EXMORE	IVW	4	0.145484	0.0236049	7.12554e-10
finngen_R8_L12_URTICA_ALLERG	IVW	4	-0.261514	0.0424612	7.32565e-10
finngen_R8_M13_SPONDYLOSIS	IVW	4	-0.0851203	0.0140131	1.245e-09
finngen_R8_E4_LIPOPROT	IVW	4	0.157946	0.0263555	2.06127e-09
finngen_R8_E4_METABOLIA	IVW	4	0.122794	0.0210533	5.45907e-09
finngen_R8_F5_ADHD	IVW	4	-0.214051	0.0367391	5.66874e-09
finngen_R8_N14_FEMGENPAIN	IVW	4	-0.107824	0.0186107	6.88659e-09
finngen_R8_L12_LICHENSIMPLEX	IVW	4	-0.324285	0.0565485	9.77241e-09
finngen_R8_O15_POSTPART_HEAMORRH_LB	IVW	4	0.203378	0.0358281	1.37486e-08
finngen_R8_M13_ARTHTROSIS_COX_PRIM_ICD10	IVW	4	-0.129024	0.0228094	1.54373e-08
finngen_R8_G6_PARKINSON	IVW	4	-0.267835	0.048494	3.33161e-08
finngen_R8_L12_SKINSUBCUTISNAS	IVW	4	-0.355781	0.0648143	4.03666e-08
finngen_R8_E4_FH	IVW	4	0.132408	0.0243228	5.21641e-08
finngen_R8_H7_CONJUHAEMOR	IVW	4	0.17936	0.0329783	5.36597e-08
finngen_R8_H7_GLAUCNAS	IVW	4	-0.356901	0.065921	6.16074e-08
finngen_R8_E4_HYPERLIPMIX	IVW	4	0.660257	0.122818	7.61946e-08
finngen_R8_O15_PREG_ECTOP	IVW	4	-0.0846847	0.0157841	8.08713e-08
finngen_R8_O15_ABORT_MEDICAL	IVW	4	-0.0516861	0.00985272	1.55547e-07
finngen_R8_M13_CERVICDISC	IVW	4	-0.145586	0.0285297	3.34356e-07
finngen_R8_K11_GULC	IVW	4	0.167554	0.03305	3.98446e-07
finngen_R8_K11_GINGIVA	IVW	4	-0.311136	0.061472	4.16133e-07
finngen_R8_H7_RETINALDETACHBREAK	IVW	4	-0.259668	0.0519089	5.66237e-07
finngen_R8_I9_CAVS_OPERATED	IVW	4	0.0857038	0.0171337	5.67206e-07
finngen_R8_O15_POSTPART_HEAMORRH_ALLW	IVW	4	0.159536	0.0321264	6.83851e-07
finngen_R8_K11_ANOMALI_DENTAL_ARCH_RELATIONS1_INCLAVO	IVW	4	0.159204	0.0320617	6.85065e-07
finngen_R8_RX_CODEINE_TRAMADOL	IVW	4	-0.118299	0.0241842	1.0002e-06
finngen_R8_M13_SPONDYLOPATHY	IVW	4	-0.0576662	0.0120876	1.83604e-06
finngen_R8_I9_STR_EMBOLIC	IVW	4	-0.391013	0.0823727	2.06579e-06
finngen_R8_M13_SYNOTEND	IVW	4	0.0465959	0.00982709	2.12066e-06
finngen_R8_G6_DYSTON	IVW	4	-0.193427	0.0410201	2.4121e-06
finngen_R8_E4_HYPERCHOL	IVW	4	0.143748	0.0313352	4.48751e-06
finngen_R8_M13_GIANTCELL	IVW	4	-0.260663	0.0568702	4.57311e-06
finngen_R8_C3_OTHER_SKIN_EXALLC	IVW	4	-0.0726067	0.0159493	5.30512e-06
finngen_R8_M13_FLATFOOT	IVW	4	-0.246942	0.055383	8.24216e-06
finngen_R8_C3_BASAL_CELL_CARCINOMA_INCLAVO_EXALLC	IVW	4	-0.075194	0.0170867	1.07894e-05
finngen_R8_C3_BASAL_CELL_CARCINOMA_EXALLC	IVW	4	-0.0786239	0.0181013	1.40203e-05
finngen_R8_L12_PAPULOSQUAMOUS	IVW	4	-0.0341706	0.00793198	1.6477e-05
finngen_R8_K11_PULPITIS_3	IVW	4	-0.162402	0.0377341	1.67863e-05
finngen_R8_O15_PREG_ABORT	IVW	4	-0.0423129	0.00984025	1.70809e-05
finngen_R8_AB1_VIRAL_WARTS	IVW	4	-0.19422	0.0456233	2.07151e-05
finngen_R8_H7_GLAUCOMA	IVW	4	-0.103286	0.0245534	2.59242e-05
finngen_R8_L12_LICHENSCLERATROPH	IVW	4	-0.330406	0.0797545	3.43103e-05
finngen_R8_I9_STR_EMBOLIC_WITH_FLIMMER	IVW	4	-0.600739	0.145188	3.50872e-05
finngen_R8_CD2_LYMPHOID_LEUKAEMIA_EXALLC	IVW	4	-0.265426	0.064169	3.5285e-05
finngen_R8_F5_SCHZPHR	IVW	4	-0.137414	0.0333249	3.73202e-05
finngen_R8_H7_BINOCUMOVOTH	IVW	4	-0.575964	0.140033	3.90461e-05
finngen_R8_K11_OESITIS	IVW	4	-0.180641	0.0440358	4.09337e-05
finngen_R8_AB1_DERMATOPHYTOSIS	IVW	4	0.244405	0.0598275	4.4045e-05
finngen_R8_ANTIDEPRESSANTS	IVW	4	-0.0317681	0.00779167	4.55841e-05
finngen_R8_F5_OTHPER	IVW	4	-0.136364	0.0335019	4.6945e-05
finngen_R8_K11_APHTA_RECUR	IVW	4	0.33331	0.0819106	4.71759e-05
finngen_R8_O15_FAILED_INDUCT	IVW	4	0.339164	0.0839477	5.34093e-05
finngen_R8_O15_POSTPART_HEAMORRH	IVW	4	0.159047	0.0394215	5.47104e-05
finngen_R8_F5_PERSMOOD	IVW	4	-0.136629	0.0338804	5.51426e-05
finngen_R8_I9_LYMPHADE	IVW	4	-0.133791	0.0336863	7.13696e-05
finngen_R8_D3_ANAEMIA_B12_DEF	IVW	4	0.147435	0.0374314	8.18923e-05
finngen_R8_Q17_OTHER_CONGEN_MALFO_DIGES_SYSTEM1	IVW	4	-0.189878	0.0493812	0.000120479
finngen_R8_F5_BEHAVE	IVW	4	-0.146936	0.0384449	0.000132374
finngen_R8_GOUT_NOS	IVW	4	0.195358	0.051315	0.000140637
finngen_R8_K11_MAJOR_ANOMALI_JAW_SIZE_INCLAVO	IVW	4	0.108422	0.0284912	0.000141553
finngen_R8_PDSTRICT_EXMORE	IVW	4	-0.272318	0.0721094	0.00015908
finngen_R8_J10_NASALPOLYP	IVW	4	-0.160078	0.0424088	0.000160245
finngen_R8_K11_PERIODON_CHRON	IVW	4	-0.110565	0.0293317	0.000163583
finngen_R8_I9_OTHILLHEART	IVW	4	-0.103364	0.0276628	0.000186554
finngen_R8_I9_ARTEMBTHRNAS	IVW	4	-0.292245	0.0798537	0.000252458
finngen_R8_K11_APPENDECTOMY	IVW	4	0.0505957	0.0138439	0.000257459
finngen_R8_CD2_BENIGN_OTHERDIGESTIVE	IVW	4	-0.0873985	0.0240183	0.000273876
finngen_R8_G6_XTRAPYR	IVW	4	-0.193585	0.0540486	0.000341379
finngen_R8_K11_VOLVU	IVW	4	0.416166	0.117393	0.00039249
finngen_R8_G6_POLYOTHUNS	IVW	4	0.12497	0.0352753	0.000396069
finngen_R8_PRIM_COXARTHROSIS	IVW	4	-0.146427	0.0418955	0.000473974
finngen_R8_CD2_NONHODGKIN_NAS_EXALLC	IVW	4	0.31944	0.0916116	0.000488667
finngen_R8_O15_MATERN_CARE_DISPROP	IVW	4	0.30193	0.0866152	0.000490526
finngen_R8_M13_CERVICALGIA	IVW	4	-0.221246	0.0640091	0.000547281
finngen_R8_ST19_FRACT_LUMBAR_SPINE_PELVIS	IVW	4	0.130395	0.0379455	0.000589541
finngen_R8_J10_PERITONSABSC	IVW	4	0.154302	0.0455375	0.000702875
finngen_R8_K11_CONSTIPATION	IVW	4	-0.027143	0.00801151	0.000704028
finngen_R8_M13_ARTHROSIS_INCLAVO	IVW	4	-0.0843979	0.0249139	0.000705128
finngen_R8_K11_FIBROCHIRLIV	IVW	4	-0.38734	0.115432	0.000791994
finngen_R8_KRA_PSY_ANYMENTAL	IVW	4	-0.0426549	0.0127441	0.000816845
finngen_R8_M13_TEMPARTERIT	IVW	4	-0.356081	0.106856	0.000861168
finngen_R8_H7_CONJUNCTIVITISACUNONATOPIC	IVW	4	-0.10772	0.0325604	0.000938574
finngen_R8_H7_GLAUCSUSP	IVW	4	-0.117931	0.0358193	0.000993441
finngen_R8_BACT_INTEST_INFECTION_NOS	IVW	4	0.299163	0.0909977	0.0010105
finngen_R8_M13_SACROCOGG	IVW	4	-0.454579	0.138304	0.00101334
finngen_R8_KRA_PSY_MOOD_EXMORE	IVW	4	-0.077825	0.0237706	0.00106034
finngen_R8_L12_ATROPHICSKIN	IVW	4	-0.288889	0.0895748	0.00125921
finngen_R8_H7_PERIPHRETINADEGEN	IVW	4	-0.184853	0.0573265	0.00126167
finngen_R8_M13_RADICULOPATHY	IVW	4	-0.138706	0.0430332	0.00126752
finngen_R8_D3_IMMUDEF	IVW	4	-0.225975	0.0708794	0.0014318
finngen_R8_F5_MOOD	IVW	4	-0.082309	0.0261074	0.00161765
finngen_R8_H7_CONJUNCTIVITISATOPIC	IVW	4	-0.361152	0.115255	0.00172729
finngen_R8_E4_DM1REN	IVW	4	0.204946	0.0654095	0.00172863
finngen_R8_Q17_OTHER_CONGEN_MALFO	IVW	4	-0.204363	0.0657759	0.00189025
finngen_R8_H7_GLAUCOMA_POAG	IVW	4	-0.158421	0.0512076	0.00197683
finngen_R8_CD2_BENIGN_PITUITARY_CRANIPHAR	IVW	4	0.180289	0.0582925	0.00198251
finngen_R8_E4_FLUIDELECTRO	IVW	4	0.0665337	0.0215283	0.00199808
finngen_R8_F5_SOMATOFORM	IVW	4	-0.104037	0.0338015	0.00208486
finngen_R8_M13_OLECRANONBURSITIS	IVW	4	0.258995	0.0845704	0.00219507
finngen_R8_CHIRHEP_NAS	IVW	4	-0.515684	0.168756	0.00224458
finngen_R8_I9_CARDARR	IVW	4	0.187837	0.0616483	0.00231211
finngen_R8_KRA_PSY_MENTALRET_EXMORE	IVW	4	-0.412743	0.135832	0.00237656
finngen_R8_SMOKING_DEPEND	IVW	4	-0.164967	0.0544629	0.00245377
finngen_R8_H8_MASTCHRON	IVW	4	0.393031	0.130534	0.00260431
finngen_R8_CD2_BENIGN_TRANSVERSE_COLON	IVW	4	0.281377	0.0936289	0.00265374
finngen_R8_M13_JUVOSTEOCHONRHIP	IVW	4	0.46265	0.154652	0.00277566
finngen_R8_K11_OTHINT	IVW	4	0.150657	0.0508673	0.00305886
finngen_R8_L12_ULCERLOWLIMB	IVW	4	-0.196123	0.0667381	0.00329593
finngen_R8_L12_OTHERSKINSUBCUTIS	IVW	4	-0.0891761	0.0304344	0.0033884
finngen_R8_D3_IMMUNEMECHANISM	IVW	4	-0.157038	0.0542258	0.00377949
finngen_R8_F5_INSOMNIA	IVW	4	-0.188862	0.0654248	0.00389299
finngen_R8_POLLENALLERG	IVW	4	-0.0492455	0.0171715	0.00413246
finngen_R8_F5_BIPO	IVW	4	-0.104309	0.0366625	0.00443943
finngen_R8_M13_PYOGARTH	IVW	4	0.114606	0.0403314	0.00448867
finngen_R8_I9_LBBB	IVW	4	0.169339	0.0597646	0.00460509
finngen_R8_J10_PLEURPLAGUE	IVW	4	0.120081	0.0429295	0.00515534
finngen_R8_I9_HYPERTROCARDMYOP	IVW	4	-0.314378	0.112525	0.00520859
finngen_R8_M13_SHOULDER	IVW	4	-0.0434836	0.0156306	0.00540347
finngen_R8_L12_FOODDERMAT	IVW	4	-0.112797	0.0405983	0.00546332
finngen_R8_G6_MONOLOWOTHUNS	IVW	4	-0.339438	0.122529	0.00560096
finngen_R8_G6_MS	IVW	4	-0.190281	0.0692241	0.0059819
finngen_R8_Q17_CONGEN_MALFO_AORTIC_MITRAL_VALVES	IVW	4	0.274701	0.100694	0.00637028
finngen_R8_Q17_CONGEN_MALFO_URINARY_SYSTEM	IVW	4	-0.344618	0.126639	0.00650317
finngen_R8_L12_OTHERDISSKINANDSUBCUTIS	IVW	4	-0.247417	0.0910451	0.00657722
finngen_R8_N14_CHRONTUBULOINTNEPHRITIS	IVW	4	-0.200709	0.0740106	0.00668992
finngen_R8_H7_RETINOCHISISCYST	IVW	4	-0.516723	0.190747	0.00674979
finngen_R8_VD_SC	IVW	4	0.601461	0.222153	0.00678094
finngen_R8_RX_N05C	IVW	4	-0.0845504	0.0314467	0.00717332
finngen_R8_I9_OTHARR	IVW	4	-0.0500304	0.0186092	0.00717774
finngen_R8_L12_INFECT_SKIN	IVW	4	0.0592042	0.0221204	0.00744078
finngen_R8_L12_OTHACUSKINSUNNAS	IVW	4	-0.384508	0.144081	0.00761464
finngen_R8_K11_OTHFUNC	IVW	4	-0.0655241	0.0248525	0.00837621
finngen_R8_I9_SAH	IVW	4	-0.152436	0.0580081	0.00859304
finngen_R8_M13_SHORTACHILLES	IVW	4	0.287803	0.109667	0.00868185
finngen_R8_M13_OSTEOCHONDROPATHY	IVW	4	-0.0765902	0.0292958	0.008939
finngen_R8_KRA_PSY_CHILDOTH_EXMORE	IVW	4	-0.207431	0.0795711	0.00913758
finngen_R8_M13_LATERALEPICOND	IVW	4	-0.204763	0.0785551	0.0091441
finngen_R8_M13_MEDIALEPICOND	IVW	3	-0.465556	0.178791	0.00921669
finngen_R8_M13_FIBROMYALGIA	IVW	4	-0.126469	0.0487131	0.00942593
finngen_R8_C3_BLADDER_EXALLC	IVW	4	0.095666	0.037089	0.0098982
finngen_R8_DM_MACULOPATHY_EXMORE	IVW	4	0.143615	0.0558798	0.010168
finngen_R8_K11_MIH_INCLAVO	IVW	4	0.214041	0.0833908	0.0102667
finngen_R8_CD2_BENIGN_SALIVARY_NOS	IVW	4	0.24534	0.0957205	0.0103747
finngen_R8_CD2_BENIGN_OVARY	IVW	4	0.159312	0.0626309	0.0109693
finngen_R8_KRA_PSY_SLEEP_NONORG_EXMORE	IVW	4	-0.217864	0.0862275	0.0115167
finngen_R8_O15_LABOUR_OTHER	IVW	4	-0.195606	0.0779944	0.0121432
finngen_R8_N14_GLOMER_NEPHRITIS	IVW	4	0.0952596	0.037989	0.0121568
finngen_R8_M13_ACHILLESTEND	IVW	4	0.0828434	0.0331095	0.0123457
finngen_R8_H8_EXTERNAL	IVW	4	-0.0637011	0.0255477	0.0126521
finngen_R8_O15_POSTPART_HAEMORRH_ANATOMY	IVW	4	0.220887	0.0886998	0.0127645
finngen_R8_AB1_PROTOZOAL	IVW	4	0.307082	0.123612	0.0129828
finngen_R8_O15_PRETERM	IVW	4	0.118519	0.0479706	0.0134865
finngen_R8_F5_AGORAPHOBIA	IVW	4	-0.267356	0.108251	0.0135197
finngen_R8_M13_CERVICOCRANSDR	IVW	4	-0.226552	0.0919955	0.0137919
finngen_R8_L12_SEBORRHOEIC	IVW	4	-0.193839	0.0787314	0.0138153
finngen_R8_CONGEN_HEART_ARTER	IVW	4	0.151448	0.0615378	0.0138526
finngen_R8_F5_PTSD	IVW	4	-0.269854	0.109964	0.0141271
finngen_R8_O15_ICP_WIDE	IVW	4	-0.112703	0.046059	0.0144076
finngen_R8_CD2_NONFOLLICULAR_LYMPHOMA_EXALLC	IVW	4	0.247386	0.101337	0.0146376
finngen_R8_N14_POSTMENATRVAG	IVW	4	-0.0842265	0.0345206	0.0146915
finngen_R8_N14_CHRONEPHROPATH	IVW	4	0.16253	0.0666476	0.0147421
finngen_R8_M13_BONEDISNAS	IVW	4	0.460696	0.188948	0.01476
finngen_R8_M13_ADHCAPSULITIS	IVW	4	-0.170746	0.0700543	0.0147959
finngen_R8_F5_EATOTH	IVW	4	-0.128586	0.0528169	0.01491
finngen_R8_CHILDHOOD_ALLERGY	IVW	4	-0.189282	0.0780707	0.0153296
finngen_R8_CD2_BENIGN_LIPOMATOUS	IVW	4	0.0422251	0.0175154	0.0159199
finngen_R8_N14_LUMPNASBREAST	IVW	4	0.0507893	0.0211271	0.0162176
finngen_R8_H7_EYEADNEXOTH	IVW	4	0.177722	0.0744063	0.016916
finngen_R8_O15_MATERN_CARE_CERVICAL_INCOMPETENCE	IVW	4	0.298689	0.125327	0.0171591
finngen_R8_K11_STOMATITIS	IVW	4	0.142094	0.0598494	0.0175876
finngen_R8_H7_KERATITISINOTH	IVW	4	0.190255	0.0801624	0.0176267
finngen_R8_H7_RETINALDISOTH	IVW	4	0.044209	0.0187301	0.0182594
finngen_R8_E4_HYPERLIPNAS	IVW	4	0.116681	0.0494569	0.0183117
finngen_R8_Q17_LVOTO_NARROW	IVW	4	0.348387	0.148612	0.0190646
finngen_R8_L12_LICHENPLANUS	IVW	4	-0.196092	0.0841732	0.0198263
finngen_R8_DM_NEPHROPATHY_EXMORE	IVW	4	0.170375	0.0732658	0.020049
finngen_R8_O15_ICP_EXMORE	IVW	4	-0.094373	0.0406812	0.0203506
finngen_R8_F5_ANAPER	IVW	4	0.29238	0.126046	0.0203611
finngen_R8_NEURODEGOTH	IVW	4	-0.0838607	0.0364189	0.0212974
finngen_R8_D3_ALLERGPURPURA	IVW	4	0.233902	0.101671	0.0214158
finngen_R8_F5_SOCPHOB	IVW	4	-0.283335	0.1232	0.0214599
finngen_R8_I9_SEQULAE	IVW	4	-0.113877	0.0495558	0.0215648
finngen_R8_H7_KERATOCONUS	IVW	4	0.673529	0.294868	0.0223616
finngen_R8_O15_POSTPART_HAEMORRH_PLACENTA	IVW	4	0.181369	0.0797898	0.0230212
finngen_R8_CD2_BENIGN_BONE_LONG_LOWER	IVW	4	-0.292039	0.128888	0.0234612
finngen_R8_GOUT_STRICT	IVW	4	0.147315	0.0651475	0.0237433
finngen_R8_O15_LABOUR_OBSTR_OTHER	IVW	4	0.403468	0.179215	0.024366
finngen_R8_ERECTILE_DYSFUNCTION	IVW	4	-0.109434	0.048615	0.0243837
finngen_R8_E4_ADDISON	IVW	4	-0.241318	0.10806	0.0255371
finngen_R8_I9_INTRACRA	IVW	4	-0.1121	0.0503378	0.0259508
finngen_R8_C3_OESOPHAGUS_EXALLC	IVW	3	-0.536395	0.24149	0.0263383
finngen_R8_VIT_DEF	IVW	4	-0.145933	0.0663803	0.0279175
finngen_R8_K11_DENTOFACIAL_ANOMALIES	IVW	4	0.0780598	0.0355932	0.0282993
finngen_R8_E4_DM1KETO	IVW	4	0.209419	0.0957446	0.028723
finngen_R8_K11_IBS	IVW	4	-0.152626	0.0697813	0.0287278
finngen_R8_N14_FEMALEGENINF	IVW	4	-0.0452439	0.0206984	0.0288253
finngen_R8_D3_ANAEMIA	IVW	4	0.0580799	0.0265888	0.0289346
finngen_R8_AB1_VARICELLA	IVW	4	-0.252988	0.115886	0.0290301
finngen_R8_OSTPOPATFRCTURE_POSTEMENO	IVW	4	0.271156	0.125029	0.030102
finngen_R8_F5_DEPRESSIO	IVW	4	-0.0795535	0.0366979	0.0301744
finngen_R8_K11_BARRET	IVW	4	0.183734	0.0849525	0.0305582
finngen_R8_F5_ANOREX	IVW	4	-0.187972	0.0869973	0.0307215
finngen_R8_M13_ARTHROSIS_POLY	IVW	4	0.17033	0.0791434	0.0313836
finngen_R8_L12_SCARCONDITIONS	IVW	4	-0.399278	0.185792	0.0316295
finngen_R8_MACULA_NAS	IVW	4	0.146646	0.0686854	0.0327574
finngen_R8_F5_SCHOLA	IVW	4	-0.324626	0.15205	0.0327611
finngen_R8_RX_ANTIHYP	IVW	4	0.0238574	0.0112056	0.0332497
finngen_R8_M13_PATELLAOTH	IVW	4	0.211047	0.0991747	0.0333344
finngen_R8_H7_HERPESKERATITIS	IVW	4	-0.430871	0.202557	0.0334067
finngen_R8_ABDOM_HERNIA	IVW	3	0.100991	0.047527	0.0335933
finngen_R8_F5_SPEECH	IVW	4	-0.215087	0.101332	0.0337884
finngen_R8_CD2_BENIGN_MELANOCYTIC_TRUNK	IVW	4	-0.287506	0.137132	0.036032
finngen_R8_N14_HYDROCELE	IVW	4	-0.0975134	0.0465592	0.0362247
finngen_R8_M13_CALCIFICTEND	IVW	4	-0.158094	0.0755256	0.0363265
finngen_R8_H7_MACULADEGEN	IVW	4	0.0866524	0.0414905	0.0367541
finngen_R8_E4_SHORT	IVW	4	-0.272532	0.130719	0.0370812
finngen_R8_H7_CORNEALNAS	IVW	4	-0.116187	0.0558061	0.037344
finngen_R8_FALLS	IVW	4	0.123572	0.0597773	0.0387141
finngen_R8_H7_ENTROPION	IVW	4	0.235244	0.114389	0.0397307
finngen_R8_C3_DLBCL_EXALLC	IVW	4	0.263124	0.128321	0.0403147
finngen_R8_HLP_C3_DLBCL	IVW	4	0.263098	0.128517	0.0406405
finngen_R8_ST19_FRACT_RIBS_STERNUM_THORACIC_SPINE	IVW	4	0.0907545	0.0443873	0.0408937
finngen_R8_N14_MENOPAUSOT	IVW	4	-0.199817	0.0978194	0.0410806
finngen_R8_O15_LABOUR_ABNORM_FORCES	IVW	4	-0.177356	0.0869965	0.0414838
finngen_R8_I9_AF_REIMB	IVW	4	-0.0589187	0.0290612	0.0426212
finngen_R8_CD2_BENIGN_MELANOCYTIC_SCALPNECK	IVW	4	-0.42856	0.214633	0.0458567
finngen_R8_KRA_PSY_SPEELING_EXMORE	IVW	4	-0.215177	0.10814	0.046612
finngen_R8_C3_SKIN_EXALLC	IVW	4	-0.0633678	0.031904	0.0470109
finngen_R8_ASTHMA_EOSINOPHIL_SUGG	IVW	4	-0.174194	0.0877149	0.0470428
finngen_R8_DENTAL_TMD_FIBRO	IVW	4	0.0504439	0.025469	0.0476367
finngen_R8_J10_BRONCHIECTASIS	IVW	4	-0.171544	0.0866443	0.0477184
finngen_R8_AB1_SYPHILIS	IVW	4	-0.309586	0.156593	0.0480399
finngen_R8_I9_ICH	IVW	4	-0.178371	0.090546	0.0488438
finngen_R8_AMN2	IVW	4	-0.0788663	0.0400363	0.0488531
finngen_R8_M13_SOFTOVERUSE	IVW	4	0.0619801	0.0315884	0.0497488
finngen_R8_AB1_CHLAMYDIA_OTHER	IVW	4	-0.186157	0.0953375	0.0508658
finngen_R8_K11_GASTRODUOULC	IVW	4	0.128264	0.0659005	0.0516154
finngen_R8_I9_AORTANEUR	IVW	4	0.157883	0.0815793	0.0529499
finngen_R8_F5_SEDAHYP	IVW	4	-0.0925984	0.0478782	0.0531081
finngen_R8_I9_AF	IVW	4	-0.0438701	0.0226886	0.0531653
finngen_R8_H7_CONJUNCTIVITISCHRON	IVW	4	0.262361	0.13574	0.0532588
finngen_R8_L12_ERYTHEMANODOSUM	IVW	4	-0.415311	0.217146	0.0558001
finngen_R8_D3_COAGDEF	IVW	4	0.328216	0.171785	0.0560535
finngen_R8_GE	IVW	4	-0.328647	0.172324	0.0565016
finngen_R8_G6_CERCYST	IVW	4	0.280864	0.147464	0.056828
finngen_R8_N14_POSTMENBLEED	IVW	4	-0.103448	0.0543466	0.0569773
finngen_R8_M13_SPINSTENOSIS	IVW	4	-0.0594658	0.0313974	0.0582287
finngen_R8_M13_OSTEONECROSIS	IVW	4	-0.211531	0.112007	0.0589509
finngen_R8_I9_AORTDIS	IVW	4	0.436564	0.231173	0.0589622
finngen_R8_F5_PHOBANX	IVW	4	-0.124005	0.0657456	0.059277
finngen_R8_AB1_OTHER_BACTERIAL	IVW	2	-0.0562198	0.0298529	0.0596692
finngen_R8_K11_OTHPERITON	IVW	4	0.174206	0.0928073	0.0605087
finngen_R8_H7_EPISCLERITIS	IVW	4	0.276155	0.147233	0.0607054
finngen_R8_H7_CATARACTSENILE	IVW	4	-0.0441539	0.0235791	0.061125
finngen_R8_G6_OTHDEMYEL	IVW	4	-0.308792	0.165044	0.0613502
finngen_R8_G6_MONOOTHUNS	IVW	4	-0.251538	0.134914	0.0622617
finngen_R8_I9_ANGIO	IVW	4	0.086162	0.0466601	0.0648069
finngen_R8_C3_NSCLC_SQUAM_EXALLC	IVW	4	-0.212313	0.114982	0.0648221
finngen_R8_O15_PLAC_PREMAT_SEPAR	IVW	4	0.435626	0.236568	0.065557
finngen_R8_M13_DUPUTRYEN	IVW	4	-0.0387066	0.0210299	0.0656879
finngen_R8_F5_MENTALUNSPE	IVW	4	0.1694	0.0920425	0.0657008
finngen_R8_I9_STR	IVW	4	-0.0746903	0.0406686	0.0662749
finngen_R8_M13_INTERVERTEB	IVW	4	-0.0284819	0.0156548	0.0688557
finngen_R8_F5_MILDRET	IVW	4	-0.299095	0.16519	0.0702001
finngen_R8_CD2_BENIGN_CONNSOFT_UPPERLIMB	IVW	4	0.173914	0.0960736	0.0702626
finngen_R8_I9_PULMEMB	IVW	4	0.073714	0.0407902	0.0707387
finngen_R8_H7_CORNEALSCAR	IVW	4	-0.263474	0.146722	0.0725355
finngen_R8_K11_TOOTH_DEV	IVW	4	0.165336	0.092383	0.0735062
finngen_R8_H8_SUP_OTINAS	IVW	4	-0.356308	0.199677	0.0743553
finngen_R8_DM_RETINA_PROLIF	IVW	4	0.0662954	0.0371871	0.0746263
finngen_R8_J10_BRONCH	IVW	4	-0.145821	0.0818321	0.0747558
finngen_R8_L12_PRURIGONOD	IVW	4	-0.394573	0.221463	0.0748034
finngen_R8_O15_ICP_WIDE_EXMORE	IVW	4	-0.102291	0.0574887	0.0751881
finngen_R8_M13_INFBURSA	IVW	2	0.380586	0.214331	0.0757837
finngen_R8_AB1_BACTINF_NOS	IVW	4	-0.059002	0.0332573	0.0760454
finngen_R8_I9_HYPTENS	IVW	4	0.0435452	0.0246024	0.076734
finngen_R8_K11_LIP_ORAL_MUCOSA	IVW	4	-0.148573	0.0839847	0.0768864
finngen_R8_CARDIAC_ARRHYTM	IVW	4	-0.033012	0.0186912	0.0773663
finngen_R8_E4_GLUCOPANCREAS	IVW	4	0.225176	0.127572	0.077548
finngen_R8_I9_HYPTENSESS	IVW	4	0.0442581	0.0251007	0.0778637
finngen_R8_SCND_OTH_KNEEARTHROSIS	IVW	4	0.30843	0.175178	0.0782954
finngen_R8_H8_OTALGIA	IVW	4	0.0871585	0.0496836	0.0793838
finngen_R8_E4_ENDOMETPOSTOP	IVW	4	0.151759	0.0867636	0.0802713
finngen_R8_D3_ACUTEPOSTBLEEDANAEMIA	IVW	4	-0.181994	0.104187	0.080673
finngen_R8_I9_CABG	IVW	3	0.120034	0.0688585	0.0812999
finngen_R8_O15_DELIV_FORCEP_VAC	IVW	4	-0.0961153	0.0551617	0.081434
finngen_R8_H7_GLAUCOMA_XFG	IVW	4	-0.118783	0.0682238	0.0816704
finngen_R8_CD2_BENIGN_DESCENDING_COLON	IVW	4	0.247256	0.142301	0.0822881
finngen_R8_CD2_BENIGN_EYE	IVW	4	0.221069	0.127499	0.0829392
finngen_R8_C3_RESPIRATORY_INTRATHORACIC_EXALLC	IVW	4	-0.140534	0.0811169	0.0831862
finngen_R8_KRA_PSY_ANXIETY_EXMORE	IVW	4	-0.0465721	0.0268995	0.0833922
finngen_R8_I9_THAORTANEUR	IVW	4	0.151933	0.0878425	0.0837
finngen_R8_N14_BARTHOABSCESS	IVW	4	-0.333141	0.193715	0.0854776
finngen_R8_I9_LYMPHOTH	IVW	4	-0.249167	0.145524	0.0868578
finngen_R8_Q17_CYSTIC_KIDNEY_DISEA	IVW	4	-0.335861	0.196286	0.0870657
finngen_R8_N14_RENFAILNAS	IVW	4	0.161423	0.0944666	0.0874916
finngen_R8_CD2_BENIGN_BONE_CARTILAGE	IVW	4	-0.130056	0.0761677	0.0877292
finngen_R8_K11_COELIAC	IVW	4	-0.194037	0.114654	0.0905767
finngen_R8_L12_ABSCESS_CUT	IVW	4	0.0861703	0.0509841	0.0910013
finngen_R8_E4_THYROIDITSUBAC	IVW	4	-0.155706	0.0922424	0.0914091
finngen_R8_I9_ENDOCARD	IVW	4	-0.11695	0.0695654	0.0927337
finngen_R8_K11_PARODON_PERIAPIC_CHRONIC	IVW	4	0.0768541	0.0458099	0.0934108
finngen_R8_ULCERNAS	IVW	4	0.206969	0.123428	0.0935731
finngen_R8_AB1_VIRAL_SKIN_MUCOUS_MEMBRANE	IVW	4	-0.0859275	0.0515875	0.0957802
finngen_R8_O15_POLYHYDR	IVW	4	-0.11021	0.0662832	0.0963694
finngen_R8_CD2_BENIGN_RECTOSIGMOID_JUNC	IVW	4	0.313026	0.18837	0.0965605
finngen_R8_COPD_OPPORTUNIST_INFECTIONS	IVW	4	-0.220791	0.13322	0.0974495
finngen_R8_K11_GALLBLAOTH	IVW	4	0.0842433	0.0510904	0.0991668
finngen_R8_H7_HORDEOLUM	IVW	4	-0.337369	0.20481	0.0995108
finngen_R8_H8_NONSUPPNAS	IVW	4	-0.0486806	0.0295642	0.0996387
finngen_R8_M13_RHEUMATISM	IVW	4	-0.0988138	0.0603183	0.101379
finngen_R8_Q17_CONGEN_MALFO_OVARIES_FALLOP_TUBES_BROAD_LIGAM	IVW	4	0.301036	0.183894	0.101628
finngen_R8_H8_EXT_INFNAS	IVW	4	-0.228967	0.14096	0.104304
finngen_R8_DRUGADVERS_CATAR	IVW	4	0.209863	0.129812	0.105948
finngen_R8_AB1_SALMONELLA_OTH	IVW	4	-0.14587	0.0904428	0.106779
finngen_R8_D3_SARCOIDOSIS	IVW	4	-0.0945545	0.0587206	0.107345
finngen_R8_L12_FOLLICULARCYST	IVW	4	0.10677	0.0667171	0.109522
finngen_R8_O15_COMPLIC_ABORT_ECTOP_MOLAR	IVW	4	0.20646	0.129146	0.109898
finngen_R8_K11_PERIODON_CHRON_COMPL	IVW	4	-0.142186	0.0889561	0.109959
finngen_R8_O15_MATERN_CARE_FETAL_ABNORM	IVW	4	-0.133151	0.0833465	0.110142
finngen_R8_M13_REACTARTH	IVW	4	0.141132	0.0885897	0.111137
finngen_R8_M13_TIETZE	IVW	4	0.0844933	0.0532977	0.112896
finngen_R8_Q17_CONGEN_MALFO_EYE_EAR_FACE_NECK	IVW	4	-0.169804	0.107155	0.113045
finngen_R8_ST19_FRACT_FEMUR	IVW	4	0.0434628	0.0274893	0.11386
finngen_R8_I9_TIA	IVW	4	-0.034497	0.021858	0.114513
finngen_R8_N14_URETHRITISANDURSYNDR	IVW	4	-0.416654	0.264019	0.114538
finngen_R8_SLEEP	IVW	4	-0.0346	0.0219261	0.114558
finngen_R8_N14_ENDOMETRIOSIS_DEEP	IVW	4	0.0454807	0.0291314	0.11847
finngen_R8_G6_TRINEU	IVW	4	-0.21524	0.137983	0.118782
finngen_R8_O15_COMPLIC_LAB_DELIV	IVW	4	0.0442182	0.0283579	0.118927
finngen_R8_M13_GOUT	IVW	4	0.0990644	0.0639416	0.121311
finngen_R8_AB1_GONOCOCCAL	IVW	4	-0.116649	0.0755383	0.12253
finngen_R8_H8_EXT_NAS	IVW	4	0.134706	0.0882602	0.126951
finngen_R8_CD2_BENIGN_COLORECANI	IVW	4	0.0754286	0.0494574	0.127229
finngen_R8_AUTOIMMUNE_HYPERTHYROIDISM	IVW	2	0.208148	0.136715	0.127885
finngen_R8_J10_PNEUMONONBACT	IVW	4	-0.471909	0.31014	0.128109
finngen_R8_K11_PERITON	IVW	4	0.0911188	0.0598919	0.128163
finngen_R8_F5_ANXIETY	IVW	4	-0.0819785	0.0538882	0.128192
finngen_R8_C3_CANCER_EXALLC	IVW	4	-0.0288874	0.0190126	0.128666
finngen_R8_C3_BRONCHUS_LUNG_EXALLC	IVW	4	-0.103756	0.0684264	0.129442
finngen_R8_ULCERRECT	IVW	4	0.228205	0.150784	0.130164
finngen_R8_K11_VENTHER	IVW	4	0.1116	0.0737596	0.130274
finngen_R8_ST19_FRACT_FOREA	IVW	4	0.0556964	0.0368213	0.130377
finngen_R8_T2D_WIDE	IVW	4	0.0486943	0.0322335	0.130872
finngen_R8_JOINTPAIN	IVW	4	-0.0515726	0.0342094	0.131668
finngen_R8_CD2_BENIGN_FEMALE_GEN_OTH	IVW	4	0.143839	0.0954138	0.131675
finngen_R8_MACULAR_PUCKER	IVW	4	0.0771109	0.0511958	0.132017
finngen_R8_AB1_PEDICULOSIS_ACARIASIS_OTHERINFEST	IVW	3	-0.220843	0.14693	0.132825
finngen_R8_K11_HAEMORR	IVW	4	0.120313	0.0805505	0.135272
finngen_R8_N14_RENFAIL	IVW	4	0.0900805	0.0603118	0.135285
finngen_R8_M13_SHOULDERNAS	IVW	4	-0.21435	0.143552	0.135388
finngen_R8_KRA_PSY_PERSON_EXMORE	IVW	4	-0.0618548	0.0414748	0.135861
finngen_R8_G6_ATYFAC	IVW	4	-0.222821	0.149511	0.136139
finngen_R8_G6_MONONPOTHUS	IVW	4	-0.266279	0.178751	0.136312
finngen_R8_H7_VITROPACIT	IVW	3	-0.347704	0.234126	0.137513
finngen_R8_G6_NEUATR	IVW	4	-0.168894	0.114288	0.139462
finngen_R8_N14_VAGINITIS	IVW	4	-0.0896545	0.0607772	0.140177
finngen_R8_M13_CARTILAGE	IVW	4	-0.381535	0.259564	0.141587
finngen_R8_N14_MALEINFERT	IVW	4	0.220268	0.150223	0.142574
finngen_R8_E4_VIT_B_DEF	IVW	4	0.428554	0.292746	0.143218
finngen_R8_C3_LUNG_NONSMALL_EXALLC	IVW	4	-0.106072	0.0725707	0.143839
finngen_R8_M13_LOOSEJOINT	IVW	4	0.358982	0.245656	0.143927
finngen_R8_AB1_BACT_INTEST_OTH	IVW	4	0.0779101	0.0534371	0.144846
finngen_R8_Q17_OTHER_CONGEN_MALFO_SKIN	IVW	3	-0.247908	0.170111	0.145027
finngen_R8_O15_LABOUR_PELVIC_ABNORM	IVW	4	0.177613	0.122106	0.145786
finngen_R8_K11_UMBHER	IVW	4	0.0710521	0.048894	0.146172
finngen_R8_I9_CHD	IVW	3	0.0749048	0.0516414	0.146924
finngen_R8_C3_THYROID_GLAND_EXALLC	IVW	4	0.235801	0.16275	0.147379
finngen_R8_C3_BRAIN_EXALLC	IVW	4	0.250533	0.172974	0.147508
finngen_R8_N14_OTHNONINFUTER	IVW	4	-0.0532089	0.0367726	0.147904
finngen_R8_N14_URETHRAOTH	IVW	4	-0.0405439	0.0280317	0.148076
finngen_R8_N14_ACUTERENFAIL	IVW	4	0.119811	0.0832396	0.150051
finngen_R8_F5_PARAPER	IVW	4	-0.231547	0.160906	0.150144
finngen_R8_K11_CROSSBITE	IVW	4	0.16636	0.115702	0.150481
finngen_R8_L12_OTHACUSKINSUN	IVW	4	-0.288628	0.201134	0.151286
finngen_R8_N14_BENIGNMAMDYSP	IVW	4	0.112231	0.078356	0.152053
finngen_R8_K11_FUNCDYSP	IVW	4	-0.0604646	0.0422468	0.152366
finngen_R8_I9_REVASC	IVW	4	0.0838826	0.0586933	0.152956
finngen_R8_O15_HAEMORRH_EARLY_PREG	IVW	4	0.0480372	0.0336373	0.153265
finngen_R8_N14_IGA_NEPHROPATHY	IVW	4	-0.406765	0.285237	0.153852
finngen_R8_FG_CEREBVASC	IVW	4	-0.0532714	0.037741	0.158097
finngen_R8_I9_SAHANEUR	IVW	4	-0.0947215	0.0672111	0.158743
finngen_R8_H7_CONJUNCTIVITIS	IVW	4	-0.0491195	0.0349657	0.160083
finngen_R8_F5_PSYTRANS	IVW	4	-0.121543	0.0867006	0.160955
finngen_R8_M13_MUSCLESTRAIN	IVW	4	-0.227749	0.162545	0.161171
finngen_R8_J10_ASBESTPNEUMOC	IVW	4	-0.397501	0.284342	0.162122
finngen_R8_F5_EMOPER	IVW	4	-0.0962261	0.0688499	0.162227
finngen_R8_J10_BRONCHNAS	IVW	3	0.234404	0.167746	0.162302
finngen_R8_C3_COLON_EXALLC	IVW	4	-0.0606735	0.0434796	0.162881
finngen_R8_O15_PREG_MATERN_CARE	IVW	4	-0.0748594	0.0537823	0.163954
finngen_R8_H7_PTOSIS	IVW	3	-0.153762	0.110551	0.164265
finngen_R8_F5_ALCOHOL_DEPENDENCE	IVW	4	-0.0686128	0.0493695	0.164595
finngen_R8_ULCERPROCT	IVW	3	-0.190976	0.137837	0.165893
finngen_R8_I9_PHLETHROMBDVTLOW	IVW	4	-0.0532151	0.0385717	0.167697
finngen_R8_C3_ENDOCRINE_EXALLC	IVW	4	0.198591	0.144242	0.168576
finngen_R8_H7_EYELIDINOTH	IVW	4	-0.186758	0.136147	0.170145
finngen_R8_L12_GRANULOMATOUSSKIN	IVW	4	-0.255438	0.186314	0.170371
finngen_R8_F5_EMOCHILD	IVW	4	-0.113884	0.0833738	0.171958
finngen_R8_CD2_BENIGN_MOUTH_PHARYNX	IVW	4	0.138069	0.101171	0.172343
finngen_R8_N14_SPERMATOCELE	IVW	4	-0.178084	0.130675	0.172944
finngen_R8_M13_ARTHROSIS	IVW	4	-0.0554263	0.0407781	0.174077
finngen_R8_SMOKING	IVW	4	-0.0618217	0.0455823	0.175015
finngen_R8_AB1_MYCOSES	IVW	4	0.130287	0.0962111	0.175681
finngen_R8_M13_MUSCULOSKELEOTH	IVW	4	0.0767944	0.0567162	0.175733
finngen_R8_ST19_TOXIC_EFFECT_ETHAN	IVW	4	-0.207145	0.153284	0.176575
finngen_R8_N14_ENDOMETRIOSIS_ASRM_STAGE1_2	IVW	4	0.10852	0.0804154	0.177179
finngen_R8_APPENDACUT_COMPLIC	IVW	3	-0.094129	0.0697762	0.177333
finngen_R8_F5_KELAMENT	IVW	4	-0.0860469	0.0638002	0.177435
finngen_R8_ALCOPANCCHRON	IVW	4	0.252777	0.187461	0.177521
finngen_R8_I9_DISVEINLYMPH	IVW	4	-0.0375485	0.0278655	0.177822
finngen_R8_G6_NEUINFL	IVW	4	0.221816	0.1647	0.178048
finngen_R8_M13_OTHERBONE	IVW	4	0.0706344	0.0524989	0.178481
finngen_R8_I9_ARTEMBTHR	IVW	4	-0.247945	0.184775	0.179637
finngen_R8_N14_ENDOMETRIOSIS_UTERUS	IVW	4	-0.10414	0.0779761	0.181702
finngen_R8_F5_SUBSNOALCO	IVW	4	-0.0810255	0.0607769	0.182478
finngen_R8_CD2_BENIGN_MELANOCYTIC	IVW	4	-0.128415	0.0964175	0.182905
finngen_R8_H7_RETINOPATHYDIAB	IVW	4	0.03855	0.0291793	0.186454
finngen_R8_H7_PARASTRA6	IVW	4	-0.273703	0.207471	0.187091
finngen_R8_M13_TENDOSYNOVITISNAS	IVW	4	-0.0695643	0.0527545	0.187289
finngen_R8_M13_GANGLION	IVW	4	0.0989486	0.0751957	0.188214
finngen_R8_AB1_SEQULAE_TUBERCU	IVW	4	-0.31372	0.238533	0.188441
finngen_R8_C_DIFFICILE_ENTEROCOLITIS	IVW	4	-0.105373	0.0802289	0.189048
finngen_R8_J10_NECROTIC	IVW	4	-0.098656	0.0752462	0.189821
finngen_R8_H8_HL_NAS	IVW	4	-0.170286	0.129965	0.190115
finngen_R8_K11_ORAL_LICHEN_WIDE_HYPOT_THYRO	IVW	4	-0.200564	0.153768	0.192124
finngen_R8_I9_E_DRONE	IVW	3	-0.366984	0.281769	0.19277
finngen_R8_F5_SCHIZOAFF	IVW	4	-0.176891	0.136072	0.193609
finngen_R8_ASTHMA_ALLERG	IVW	4	-0.0587791	0.0452514	0.193962
finngen_R8_M13_LIMBPAIN	IVW	4	-0.0590558	0.0454806	0.194121
finngen_R8_H8_SUP_ACUTE	IVW	4	-0.0840469	0.0647722	0.194433
finngen_R8_KRA_PSY_CODUCTEMOT_EXMORE	IVW	4	0.163565	0.126212	0.19499
finngen_R8_E4_HYPERPIT	IVW	4	0.196854	0.152146	0.195717
finngen_R8_E4_HYPOOSMNAT	IVW	4	0.0861172	0.0665597	0.195723
finngen_R8_H7_RETINANAS	IVW	4	-0.279728	0.216451	0.19624
finngen_R8_D3_ANAEMIA_IRONDEF	IVW	4	0.0910487	0.0704601	0.196287
finngen_R8_I9_VARICVEOES	IVW	4	-0.33098	0.256626	0.197143
finngen_R8_M13_BICIPITALTEND	IVW	4	-0.189522	0.147129	0.197698
finngen_R8_H7_GLAUCOMA_NTG	IVW	4	-0.168854	0.131104	0.197769
finngen_R8_O15_POOR_FETGRO	IVW	4	0.164726	0.127965	0.198
finngen_R8_M13_SOFTTISSUEOTH	IVW	4	-0.0559446	0.0435582	0.199015
finngen_R8_DRUGADVERS_NEUTROPENIA	IVW	4	0.105192	0.0819604	0.199334
finngen_R8_H7_HYPERMETRO	IVW	4	0.106433	0.0829682	0.199554
finngen_R8_N14_SALPHOOPH	IVW	4	-0.116212	0.0906918	0.200057
finngen_R8_CD2_BENIGN_OTHER_NOS	IVW	4	-0.107769	0.0844263	0.201785
finngen_R8_I9_PAROXTAC	IVW	4	-0.0896933	0.0705733	0.203755
finngen_R8_RX_GLUCOSAMINE	IVW	4	-0.0352853	0.0277894	0.204178
finngen_R8_G6_XTRAPYROTH	IVW	4	-0.154218	0.121471	0.204231
finngen_R8_E4_ENDODISNAS	IVW	4	0.276109	0.217913	0.205133
finngen_R8_M13_PSORIARTH	IVW	4	0.105932	0.0837201	0.205761
finngen_R8_M13_POLYARTHRITIS	IVW	4	-0.245501	0.194439	0.206728
finngen_R8_K11_ACUTPANC	IVW	4	0.0602445	0.0477918	0.207467
finngen_R8_H7_PARASTRAB	IVW	4	-0.0706079	0.0560794	0.208005
finngen_R8_H7_GLOBE	IVW	4	-0.365243	0.290481	0.208618
finngen_R8_L12_LYMPHADENITIS	IVW	4	0.161646	0.128983	0.210122
finngen_R8_L12_LICHENPLANUS_INCLAVO	IVW	4	-0.102408	0.0817214	0.210155
finngen_R8_C3_PROSTATE_EXALLC	IVW	4	-0.0673977	0.0538277	0.210533
finngen_R8_GE_STRICT	IVW	4	-0.286255	0.22866	0.210613
finngen_R8_CD2_BENIGN_LIPO_SKIN_TRUNK	IVW	4	0.077574	0.0621584	0.212029
finngen_R8_J10_EXTERLUNG	IVW	4	-0.10181	0.0816887	0.212649
finngen_R8_M13_DORSOPATHY	IVW	4	-0.0215132	0.0172649	0.21274
finngen_R8_Q17_LVOTO_BROAD	IVW	4	0.12969	0.104179	0.213178
finngen_R8_F5_DEPPER	IVW	4	-0.260576	0.209406	0.213368
finngen_R8_L12_VASCULITISNAS	IVW	4	-0.194872	0.156661	0.213533
finngen_R8_CD2_BENIGN_CONNECTIVE_SOFT	IVW	4	0.100724	0.0809944	0.213652
finngen_R8_N14_CALCUKIDUR	IVW	4	-0.0448939	0.0362806	0.215935
finngen_R8_M13_DEFORMACQ	IVW	4	0.122963	0.099396	0.216051
finngen_R8_CD2_BENIGN_ASCENDING_COLON	IVW	4	0.111707	0.0903088	0.216107
finngen_R8_H7_RETINALDETACH	IVW	4	-0.0370796	0.029981	0.216173
finngen_R8_H7_CHALAZION	IVW	4	-0.0617732	0.0499719	0.2164
finngen_R8_C3_CORPUS_UTERI_EXALLC	IVW	4	-0.141018	0.114105	0.21651
finngen_R8_I9_THROMBOTH	IVW	4	-0.152926	0.124005	0.217489
finngen_R8_L12_PSORI_ARTHRO	IVW	4	0.108572	0.088071	0.217661
finngen_R8_COPD_INSUFFICIENCY	IVW	4	0.10058	0.0816984	0.218278
finngen_R8_E4_DM2NASCOMP	IVW	4	-0.0225837	0.0183477	0.218369
finngen_R8_L12_ALOPECAREATA	IVW	4	-0.353768	0.289241	0.221296
finngen_R8_I9_AORTVALV_EARLY	IVW	4	0.115652	0.09472	0.222089
finngen_R8_CD2_BENIGN_LARYNX	IVW	4	-0.13728	0.112479	0.222278
finngen_R8_F5_DISSOCIATIVE	IVW	4	-0.171217	0.140599	0.223311
finngen_R8_DM_RETINOPATHY_EXMORE	IVW	4	0.0545847	0.0448586	0.223674
finngen_R8_H8_HL_PRESBY	IVW	4	0.102027	0.0843392	0.226385
finngen_R8_RHEU_ARTHRITIS_OTH	IVW	4	0.0663849	0.0548843	0.226454
finngen_R8_K11_SALIVARY	IVW	4	0.0833421	0.068934	0.226658
finngen_R8_AB1_RUBELLA	IVW	4	-0.223867	0.185335	0.227083
finngen_R8_Q17_SEPTA_DEFEC	IVW	4	0.135875	0.113363	0.230691
finngen_R8_L12_ERYTHEMATOUSOTH	IVW	4	-0.190591	0.159078	0.23088
finngen_R8_M13_CERVICOBRACHSDR	IVW	4	-0.140278	0.117135	0.231081
finngen_R8_N14_VULVAL_DYSPLASIA_ALL	IVW	4	0.262238	0.219111	0.231375
finngen_R8_ABDOM_HERNIA_POSTOP	IVW	4	0.100692	0.0842057	0.231781
finngen_R8_O15_LABOUR_LONG	IVW	4	-0.081526	0.0683027	0.232635
finngen_R8_F5_BEHEMOCHILD	IVW	4	-0.0799236	0.0670013	0.232921
finngen_R8_H7_IRIDONAS	IVW	4	-0.104423	0.0880427	0.235602
finngen_R8_H7_CORNEALDEFORM	IVW	4	-0.195332	0.164717	0.235675
finngen_R8_M13_NEURALGIA	IVW	4	-0.136467	0.115124	0.235864
finngen_R8_APPENDACUT_NOCOMPLIC	IVW	4	0.027863	0.0235622	0.236995
finngen_R8_K11_GINGIVITIS_PERIODONTAL	IVW	4	-0.0357464	0.0304244	0.240025
finngen_R8_H7_RETINASEPAR	IVW	4	-0.214176	0.182614	0.240863
finngen_R8_TEMPOROMANDIB_INCLAVO	IVW	4	0.0403027	0.0343941	0.24128
finngen_R8_K11_OTHABDHER	IVW	4	0.090758	0.0774562	0.241304
finngen_R8_AB1_HERPES_SIMPLEX	IVW	4	-0.0851712	0.0732249	0.24477
finngen_R8_G6_NERPLEX	IVW	4	-0.031739	0.0273044	0.245068
finngen_R8_CD2_BENIGN_SALIVARY	IVW	4	0.118867	0.102856	0.24782
finngen_R8_U22_COVID19_CONFIRMED	IVW	4	0.132382	0.114669	0.24831
finngen_R8_AB1_VIRAL_HEPATITIS	IVW	4	-0.176667	0.154	0.251303
finngen_R8_K11_ORAL_LICHEN_PLANUS_WIDE	IVW	4	-0.0866986	0.0755899	0.251398
finngen_R8_M13_ENTESOPATHYLOWNAS	IVW	4	-0.139033	0.12156	0.25273
finngen_R8_Z21_PROBL_RELATED_MEDICAL_FACILITI_OTH_HEALTH_CARE	IVW	4	0.17349	0.151771	0.252995
finngen_R8_OSTEOPOROSIS_FRACTURE_FG	IVW	4	0.133642	0.117038	0.253508
finngen_R8_F5_ALLANXIOUS	IVW	4	-0.0666782	0.0586784	0.255818
finngen_R8_M13_SHOULDERBURSITIS	IVW	4	0.186621	0.164465	0.256493
finngen_R8_CD2_MYELOID_LEUKAEMIA_EXALLC	IVW	4	-0.144622	0.127458	0.256513
finngen_R8_O15_MATERN_CARE	IVW	4	0.0197041	0.0173807	0.256929
finngen_R8_D3_ANAEMIA_IRONDEF_NAS	IVW	4	0.087779	0.0774823	0.25726
finngen_R8_F5_PSYCHDEV	IVW	4	-0.111958	0.0989191	0.257711
finngen_R8_J10_CHRONSINUSITIS	IVW	4	-0.0365185	0.0323025	0.25826
finngen_R8_F5_PANIC	IVW	4	-0.128302	0.11349	0.25826
finngen_R8_C3_MALE_GENITAL_EXALLC	IVW	4	-0.0669179	0.0594197	0.260085
finngen_R8_N14_ENDOMETRIOSIS_PELVICPERITONEUM	IVW	4	0.0941207	0.0836551	0.260545
finngen_R8_N14_OTHFEMPELINF	IVW	4	-0.0708514	0.0629856	0.260639
finngen_R8_O15_PLAC_PRAEVIA	IVW	4	0.211588	0.188222	0.260955
finngen_R8_AB1_TUBERCULOSIS	IVW	4	-0.0524836	0.0467372	0.261458
finngen_R8_PD2ND_EXMORE	IVW	4	-0.339719	0.303176	0.262486
finngen_R8_AB1_INTESTINAL_INFECTIONS	IVW	4	0.032092	0.0286457	0.262583
finngen_R8_CD2_BENIGN_LIP	IVW	4	0.298795	0.266838	0.262815
finngen_R8_C3_SQUOMOUS_CELL_CARCINOMA_SKIN_EXALLC	IVW	4	-0.104872	0.0936647	0.26286
finngen_R8_AB1_MUMPS	IVW	4	0.0603774	0.0539506	0.263087
finngen_R8_L12_NAILDIS	IVW	4	-0.154314	0.137983	0.263415
finngen_R8_D3_HAEMOLYTICANAEMIA	IVW	4	-0.139617	0.124999	0.264019
finngen_R8_RHEUMA_ARHTROPAT_REACTIVE	IVW	4	0.109295	0.0978804	0.264159
finngen_R8_PAIN	IVW	4	-0.0265888	0.0238492	0.264907
finngen_R8_CD2_BENIGN_CONJUNCTIVA	IVW	4	0.314083	0.283017	0.267099
finngen_R8_E4_GRAVES_STRICT	IVW	4	0.202096	0.182139	0.267183
finngen_R8_CD2_BENIGN_BREAST	IVW	4	-0.147524	0.133082	0.26764
finngen_R8_N14_PHIMOSIS	IVW	4	-0.0710533	0.0641214	0.267816
finngen_R8_K11_MN_RETRGN	IVW	4	0.134966	0.121942	0.268379
finngen_R8_C3_NSCLC_ADENO_EXALLC	IVW	4	-0.187229	0.169248	0.268622
finngen_R8_I9_CEREBDOTH	IVW	4	0.150963	0.136707	0.269471
finngen_R8_N14_MENSIRREG	IVW	4	-0.0639983	0.0582715	0.272083
finngen_R8_TONGUEABNORMALITY	IVW	4	-0.0685031	0.0629862	0.276777
finngen_R8_H7_IRIDOACUTE	IVW	4	-0.0851614	0.0783517	0.277076
finngen_R8_CD2_BENIGN_CRANIAL_NERVE	IVW	4	0.157183	0.144977	0.278277
finngen_R8_H8_EXTDISNAS	IVW	4	-0.239449	0.221055	0.278715
finngen_R8_M13_BURSOPATHY	IVW	3	0.128721	0.119395	0.280984
finngen_R8_H7_IRIDOCYCLITIS	IVW	4	-0.0817621	0.0758478	0.281044
finngen_R8_AB1_SCABIES	IVW	3	-0.185629	0.172414	0.281639
finngen_R8_L12_PILONIDALCYST	IVW	4	0.131121	0.121904	0.282099
finngen_R8_K11_PULP_PERIAPICAL	IVW	4	0.0516973	0.0481098	0.282568
finngen_R8_M13_CONNECTNAS	IVW	2	0.15159	0.141946	0.28555
finngen_R8_K11_UC_STRICT2	IVW	4	0.12004	0.113918	0.292002
finngen_R8_SFN	IVW	4	0.110443	0.104816	0.292027
finngen_R8_I9_PROGVASC	IVW	4	0.158189	0.150492	0.293191
finngen_R8_O15_MATERN_CARE_OTHER	IVW	4	0.0408623	0.03891	0.293638
finngen_R8_O15_PUERP_INFECT_OTHER	IVW	4	-0.100022	0.0953098	0.293975
finngen_R8_CD2_BENIGN_COLON_NOS	IVW	4	0.103492	0.0986545	0.294162
finngen_R8_M13_CHONDROMALACIA	IVW	4	-0.191051	0.182383	0.294859
finngen_R8_J10_PHARYNGITIS	IVW	4	0.0607391	0.0580227	0.295184
finngen_R8_HYPOTHY_REIMB	IVW	4	0.0740005	0.070789	0.295853
finngen_R8_H8_TINNITUS	IVW	4	0.0783227	0.0752932	0.29823
finngen_R8_L12_URTICARIA	IVW	4	-0.0770148	0.0740601	0.298388
finngen_R8_O15_DELIV_CAESAR	IVW	4	-0.0249779	0.0240224	0.298445
finngen_R8_E4_HYPOPARA	IVW	4	0.182801	0.175819	0.298474
finngen_R8_M13_ENTESOPATHYOTH	IVW	3	-0.0927416	0.089304	0.299041
finngen_R8_E4_HYTHY_AI_STRICT	IVW	4	-0.0332227	0.0319969	0.299126
finngen_R8_O15_CONCEPT_ABNORM	IVW	4	-0.0325609	0.0314506	0.300528
finngen_R8_J10_VOCALLARYNX	IVW	3	0.0438815	0.0424579	0.301356
finngen_R8_RX_INFERTILITY	IVW	4	-0.0922557	0.0892868	0.301486
finngen_R8_KRA_PSY_DEVWIDE_EXMORE	IVW	4	0.353052	0.34253	0.302673
finngen_R8_AUD_SWEDISH	IVW	4	-0.037266	0.0361861	0.303084
finngen_R8_Q17_OTHER_CONGEN_MALFO_CIRCULATO_SYSTEM	IVW	4	-0.244904	0.239135	0.305777
finngen_R8_M13_ENTESOPATHYLOW	IVW	4	-0.0407715	0.0398341	0.306057
finngen_R8_N14_FEMALE_GENITAL_DYSPLASIA_ALL	IVW	4	0.0392494	0.0384352	0.307168
finngen_R8_E4_DMNAS	IVW	4	0.132034	0.129442	0.307719
finngen_R8_AB1_STREPTO_SEPSIS	IVW	4	-0.14467	0.142065	0.308515
finngen_R8_FG_CVD	IVW	4	-0.0155788	0.0153427	0.30992
finngen_R8_M13_POLYARTHROPATHIES	IVW	4	0.0423336	0.0417817	0.31096
finngen_R8_G6_MERALGIA	IVW	4	0.124798	0.123501	0.312256
finngen_R8_K11_PULPITIS_1_ONLYAVO	IVW	4	-0.0274951	0.0272214	0.31247
finngen_R8_M13_HYPERMOBILITY	IVW	3	0.15177	0.150459	0.313114
finngen_R8_K11_CHRONHEP	IVW	4	-0.198024	0.196322	0.313134
finngen_R8_K11_VASCINT	IVW	4	-0.118896	0.118171	0.314349
finngen_R8_H7_RETINOPATHYDIAB_BKG_SEVERE	IVW	4	0.0730788	0.0727299	0.314994
finngen_R8_H7_VISUDISTURB	IVW	4	-0.0284595	0.0283798	0.315953
finngen_R8_F5_PSYCHOTH	IVW	4	0.0451783	0.0451489	0.316995
finngen_R8_H8_EUSTSALP	IVW	4	-0.0793369	0.0794405	0.317942
finngen_R8_H7_LACRIMALSYSTEM	IVW	4	0.0362814	0.0364025	0.318923
finngen_R8_N14_OTHNONINFVAG	IVW	4	0.163917	0.164481	0.318971
finngen_R8_O15_DELIV_PERIN_LACER	IVW	4	-0.0974578	0.0981477	0.320724
finngen_R8_N14_CERVICAL_LSIL	IVW	4	0.0658358	0.0665547	0.322567
finngen_R8_WET_AMD	IVW	3	0.175837	0.17832	0.324096
finngen_R8_SCND_OTH_COXARTHROSIS	IVW	4	-0.129788	0.132351	0.326771
finngen_R8_N14_NEUROMUSCDYSBLADD	IVW	4	-0.129639	0.13223	0.326887
finngen_R8_M13_SPINENTHES	IVW	4	0.0955951	0.0975965	0.327337
finngen_R8_N14_GLOMEINOTH	IVW	4	-0.0761244	0.0777338	0.327433
finngen_R8_H7_CHORIORETINFLAM	IVW	4	0.199543	0.203884	0.327723
finngen_R8_K11_CROWDI_TEETH_INCLAVO	IVW	4	0.0913934	0.093436	0.328006
finngen_R8_CPAP	IVW	4	0.0669144	0.0685127	0.328732
finngen_R8_VWXY20_SUICI_OTHER_INTENTI_SELF_H	IVW	4	0.139401	0.143458	0.331188
finngen_R8_N14_PROSTHYPERPLA	IVW	4	-0.0411885	0.0424311	0.331691
finngen_R8_D3_IMMUNEMECHANISMNAS	IVW	4	-0.23902	0.246417	0.332057
finngen_R8_O15_DELIV_SPONT	IVW	4	-0.0310559	0.0321122	0.333491
finngen_R8_F5_SCHIZOTYP	IVW	4	0.132807	0.137559	0.334316
finngen_R8_F5_MOODOTH	IVW	4	-0.105691	0.109622	0.334976
finngen_R8_N14_INFLAMMBREAST	IVW	4	0.121802	0.126623	0.336089
finngen_R8_KRA_PSY_SUBSTANCE_EXMORE	IVW	4	-0.0374241	0.0389387	0.3365
finngen_R8_L12_FOLICULAROTH	IVW	4	0.0971911	0.101242	0.337059
finngen_R8_GE_MODE	IVW	4	-0.126585	0.132058	0.337781
finngen_R8_M13_BAKERCYST	IVW	4	0.0875362	0.0913486	0.337929
finngen_R8_K11_DIAHER	IVW	4	0.0622279	0.0649884	0.338304
finngen_R8_H8_EXTDISINOTH	IVW	4	-0.222482	0.232373	0.338348
finngen_R8_K11_PARALIL	IVW	4	0.143071	0.150291	0.341116
finngen_R8_RHEUMA_NOS	IVW	4	0.078509	0.082551	0.341586
finngen_R8_CIRRHOSIS_BROAD	IVW	4	-0.108963	0.114656	0.341938
finngen_R8_C3_BREAST_HERNEG_EXALLC	IVW	4	-0.0449373	0.0474133	0.343242
finngen_R8_M13_TOEDEFORMOTH	IVW	4	0.117028	0.123527	0.343444
finngen_R8_ARTHRO_SPEC	IVW	4	0.222879	0.235297	0.343523
finngen_R8_ASTHMA_OBESITY	IVW	4	-0.066915	0.0707556	0.344291
finngen_R8_ALLERG_ASTHMA	IVW	4	-0.0342239	0.0362403	0.344986
finngen_R8_ST19_FRACT_LOWER_LEG_INCLU_ANKLE	IVW	4	0.0322461	0.0342479	0.346423
finngen_R8_H8_EUSTNAS	IVW	4	-0.162917	0.1731	0.346616
finngen_R8_K11_HERNIA	IVW	3	0.0272486	0.0289911	0.347271
finngen_R8_K11_BILIAOTH	IVW	4	-0.0697556	0.0742217	0.347306
finngen_R8_THROMBOCYTAEMIA	IVW	4	-0.126266	0.134834	0.349041
finngen_R8_D3_OTHERWHITECELL	IVW	4	-0.101466	0.108402	0.349262
finngen_R8_H8_VESTIBNEUR	IVW	4	0.0598426	0.064085	0.350407
finngen_R8_H7_MYOPIA	IVW	4	-0.0833627	0.089308	0.350598
finngen_R8_I9_ARTOTH	IVW	4	-0.0668883	0.0722564	0.354598
finngen_R8_K11_OESOBST	IVW	4	-0.124548	0.134614	0.35485
finngen_R8_AB1_OTHER_SPIROCHAETAL	IVW	4	0.116681	0.126272	0.355463
finngen_R8_N14_CERVICAL_DYSPLASIA_ALL	IVW	4	0.0394238	0.0427639	0.356584
finngen_R8_K11_ORAL_LEUCOPLAC_RELAT_INCLAVO	IVW	4	-0.0456758	0.0497514	0.358577
finngen_R8_AUD	IVW	4	-0.0452781	0.0493545	0.358931
finngen_R8_N14_INFLUTH	IVW	4	0.0254547	0.0277591	0.35915
finngen_R8_G6_RADLES	IVW	4	-0.116905	0.127777	0.360234
finngen_R8_I9_MI_STRICT	IVW	4	0.0186291	0.0203775	0.360613
finngen_R8_H8_PERFORATION	IVW	4	-0.0886377	0.0972872	0.362247
finngen_R8_K11_KELAIBD	IVW	3	0.124232	0.136541	0.362901
finngen_R8_DM_SEVERAL_COMPLICATIONS	IVW	4	0.0560093	0.0616341	0.363488
finngen_R8_K11_PARODON_OPER_DENTAL_OPER	IVW	4	-0.0316236	0.0349043	0.364931
finngen_R8_INV_VENT	IVW	4	0.103963	0.114756	0.364964
finngen_R8_H7_CONVERSTRAB	IVW	4	0.109739	0.121173	0.365129
finngen_R8_M13_MONOARTHRITIS	IVW	4	0.137616	0.152335	0.366327
finngen_R8_H7_IRIDOCYC_ANTER	IVW	4	-0.0678159	0.0754171	0.36854
finngen_R8_CD2_BENIGN_SIGMOID_COLON	IVW	4	0.0802938	0.0894257	0.369248
finngen_R8_CD2_BENIGN_RECTUM	IVW	4	0.0503487	0.0561544	0.369926
finngen_R8_NECROVASC_FG	IVW	4	-0.119425	0.133201	0.369947
finngen_R8_J10_BRONCHIOLITIS	IVW	4	-0.139581	0.15595	0.37077
finngen_R8_N14_HYDRONEPHR	IVW	4	-0.0156157	0.017489	0.371918
finngen_R8_K11_OESSTODUO	IVW	4	0.0160326	0.0180259	0.373777
finngen_R8_L12_ATOPIC	IVW	4	-0.0579049	0.065126	0.373938
finngen_R8_H7_RETIVASCOCCLUSION	IVW	4	0.0735986	0.083001	0.37523
finngen_R8_N14_PROSTAOTH	IVW	4	-0.102194	0.115386	0.375794
finngen_R8_DM_NEOVASCULAR_GLAUCOMA	IVW	4	-0.17588	0.199087	0.377004
finngen_R8_O15_DELIV_MULTIP	IVW	4	-0.117974	0.133907	0.378311
finngen_R8_N14_VULVAL_LSIL	IVW	4	0.1736	0.197084	0.378404
finngen_R8_E4_DM1COMA	IVW	4	-0.0454801	0.0517824	0.379785
finngen_R8_G6_EPIPAROX	IVW	4	-0.0271281	0.0309684	0.381034
finngen_R8_I9_VASCINT	IVW	4	-0.156912	0.180031	0.383434
finngen_R8_L12_DERM_NUMMULAR	IVW	4	0.0821324	0.0942891	0.383716
finngen_R8_J10_PLEUREFFUSION	IVW	4	-0.0802849	0.0922893	0.384341
finngen_R8_G6_ALCODEGEN	IVW	4	0.21123	0.242818	0.384348
finngen_R8_K11_CHOLANGI	IVW	4	0.149121	0.171814	0.385439
finngen_R8_CD2_BENIGN_THYROID	IVW	4	-0.249599	0.287727	0.385674
finngen_R8_M13_JUVERHEU	IVW	4	-0.207474	0.239446	0.38623
finngen_R8_H7_CORNEALOTH	IVW	4	0.119341	0.139245	0.391411
finngen_R8_ULCERENTER	IVW	4	0.112902	0.131737	0.39143
finngen_R8_O15_LABOUR_FETAL_STRESS	IVW	4	0.0444357	0.0520099	0.392901
finngen_R8_J10_SINUSITIS	IVW	4	0.0510995	0.0599604	0.394092
finngen_R8_AB1_ERYSIPELAS	IVW	4	-0.0485694	0.0570125	0.394266
finngen_R8_ASTHMA_PNEUMONIA	IVW	4	0.0257867	0.0302784	0.394405
finngen_R8_E4_VOLUME	IVW	4	0.140961	0.16567	0.394849
finngen_R8_ST19_FRACT_SHOUL_UPPER_ARM	IVW	4	0.045096	0.0530025	0.394865
finngen_R8_N14_ENDOMET_INFERT	IVW	4	0.110874	0.130624	0.395992
finngen_R8_J10_ACUTELOWERNAS	IVW	4	0.0600978	0.070814	0.396064
finngen_R8_REAC_ARTHRO_NOS	IVW	4	0.0955134	0.112579	0.396208
finngen_R8_H7_CONJUVASC	IVW	4	-0.213068	0.251193	0.396312
finngen_R8_N14_MALEGEN	IVW	4	-0.0360078	0.0425487	0.397401
finngen_R8_M13_ANKYLOSPON	IVW	4	-0.0863839	0.10209	0.397466
finngen_R8_M13_MCTD	IVW	3	0.20069	0.237351	0.397809
finngen_R8_FE	IVW	3	0.0711999	0.084465	0.399256
finngen_R8_H8_MED_SUPP	IVW	4	-0.0457976	0.0543649	0.399558
finngen_R8_N14_NEPHROTICSYND	IVW	4	0.236516	0.280914	0.399814
finngen_R8_I9_SECONDRIGHT	IVW	4	-0.205415	0.244204	0.400258
finngen_R8_H8_CERUMEN	IVW	4	-0.114131	0.135928	0.401109
finngen_R8_N14_TUBULOINTNEPHRNAS	IVW	4	0.066031	0.0787012	0.401465
finngen_R8_F5_SCHIZPER	IVW	4	-0.261403	0.311742	0.401736
finngen_R8_M13_BIOMECHLESIO	IVW	4	0.154594	0.184856	0.402987
finngen_R8_G6_ULLNLE	IVW	4	0.0820596	0.0983655	0.40415
finngen_R8_I9_POSTAMI	IVW	4	-0.0758842	0.0910207	0.404449
finngen_R8_C3_RECTUM_ADENO	IVW	4	0.0817079	0.0980185	0.404508
finngen_R8_AB1_VIRAL_CNS	IVW	4	0.130496	0.157599	0.407655
finngen_R8_N14_ABNORMALBLEED	IVW	4	-0.0267686	0.0323618	0.408142
finngen_R8_L12_DISORDSKINAPPENDIX	IVW	4	-0.0266123	0.0321863	0.40834
finngen_R8_D3_COAGDEF_PURPUR_HAEMORRHAGIC	IVW	4	0.0720126	0.0871738	0.408758
finngen_R8_JUVEN_ARTHR	IVW	4	-0.131013	0.15868	0.409008
finngen_R8_I9_HYPTENSHD	IVW	4	0.065166	0.0790291	0.409609
finngen_R8_F5_OCD	IVW	4	-0.130499	0.158393	0.410002
finngen_R8_D3_IMMUDEFANTIBODY	IVW	4	-0.0692376	0.0840572	0.410112
finngen_R8_N14_OVARTORS	IVW	4	-0.146317	0.17801	0.4111
finngen_R8_J10_ASTHMA_EXMORE	IVW	4	-0.022463	0.0273696	0.4118
finngen_R8_CD2_BENIGN_MELANOCYTIC_NOS	IVW	4	-0.118284	0.144133	0.41184
finngen_R8_N14_FEMALE_GENITAL_HSIL	IVW	4	0.0463625	0.0565942	0.412667
finngen_R8_H7_DIPLOPIA	IVW	3	-0.148943	0.182326	0.413982
finngen_R8_AB1_BACT_BIR_OTHER_INF_AGENTS	IVW	4	0.0476499	0.0584149	0.414663
finngen_R8_H7_VERTISTRAB	IVW	4	-0.168512	0.207365	0.416428
finngen_R8_O15_ANTEPART_HAEM_NAS	IVW	4	0.106297	0.131278	0.418107
finngen_R8_N14_OTHETNASKIDUR	IVW	4	0.166266	0.205342	0.418111
finngen_R8_CD2_BENIGN_SKIN	IVW	4	-0.0687479	0.0850094	0.418682
finngen_R8_THYROIDITIS	IVW	4	-0.0549271	0.0679678	0.419013
finngen_R8_K11_EROSION_INCLAVO	IVW	4	-0.0412647	0.0514476	0.422511
finngen_R8_L12_PSORIASIS	IVW	4	0.0336223	0.0419301	0.422631
finngen_R8_POLYCYTVERA	IVW	4	0.134518	0.168121	0.423639
finngen_R8_L12_URTICA_DERTMATOG	IVW	4	0.111535	0.13946	0.423848
finngen_R8_C3_DIGESTIVE_ORGANS_EXALLC	IVW	4	-0.0405769	0.0507396	0.423879
finngen_R8_M13_DORSOPATHYOTH	IVW	4	-0.0233579	0.029212	0.423942
finngen_R8_RHEUMA_SEROPOS_STRICT	IVW	4	-0.0256187	0.0320739	0.424441
finngen_R8_K11_ENERCOLNONINF	IVW	3	0.0790992	0.0990555	0.42456
finngen_R8_M13_PLANTARFASC	IVW	4	0.0703842	0.0886138	0.427032
finngen_R8_C3_BREAST_HERPLUS_EXALLC	IVW	4	0.0394338	0.0498155	0.428596
finngen_R8_F5_STRESSOTH	IVW	4	-0.0235028	0.0297097	0.428895
finngen_R8_O15_PREG_PROLONGED	IVW	4	-0.0783939	0.099162	0.429199
finngen_R8_N14_PROHERNOV	IVW	4	-0.18263	0.23111	0.429391
finngen_R8_FG_OTHHEART	IVW	4	-0.0166093	0.0210246	0.429531
finngen_R8_FG_DOAAC	IVW	4	0.0469475	0.0594322	0.429566
finngen_R8_L12_ROSACEANAS	IVW	4	-0.0836965	0.106216	0.430708
finngen_R8_ALCO_PRESCRIPTION	IVW	4	0.0426209	0.0541887	0.431559
finngen_R8_I9_RHEUFEV	IVW	4	0.125843	0.160056	0.431725
finngen_R8_E4_GRAVES_OPHT_STRICT	IVW	4	0.193862	0.248257	0.434866
finngen_R8_K11_PARODON_OPER	IVW	4	-0.0337436	0.0433306	0.436129
finngen_R8_MUCOPROCT	IVW	4	0.101748	0.131228	0.438129
finngen_R8_J10_ASTHMA_MAIN_EXMORE	IVW	4	-0.034929	0.0450949	0.438596
finngen_R8_AB1_VIRAAL_CONJUNCT	IVW	4	0.141098	0.182183	0.438645
finngen_R8_AB1_HEPATITIS_OTHER_VIRAL	IVW	4	-0.137994	0.178531	0.439557
finngen_R8_I9_HEARTFAIL_AND_ANTIHYPERT	IVW	4	0.0230582	0.0299018	0.440629
finngen_R8_H8_OTOSCLE	IVW	4	0.104686	0.135839	0.440907
finngen_R8_H8_HL_CON_NAS	IVW	3	0.0891426	0.116322	0.44347
finngen_R8_N14_OTHINFVAGVULV	IVW	4	0.161015	0.210194	0.443658
finngen_R8_H7_CHOROIDRETINA	IVW	4	0.0263206	0.0345278	0.44588
finngen_R8_M13_CHRONDROPATHIES	IVW	4	0.0430724	0.0565113	0.445946
finngen_R8_E4_LACTONAS	IVW	4	0.0939823	0.1234	0.446294
finngen_R8_G6_SLEEPAPNO_INCLAVO	IVW	4	-0.0191744	0.025233	0.447318
finngen_R8_FG_CARDMYO	IVW	4	-0.0551887	0.0726731	0.447607
finngen_R8_E4_HYPERKALAEMIA	IVW	4	-0.101037	0.133053	0.447627
finngen_R8_K11_CHOLECYST	IVW	4	0.0874135	0.115124	0.447675
finngen_R8_N14_DIALYSIS	IVW	4	0.0769339	0.101795	0.449787
finngen_R8_M13_ENTEROARTHR	IVW	4	0.189824	0.25135	0.450119
finngen_R8_K11_CHRONGASTR	IVW	4	0.0466617	0.0619385	0.451237
finngen_R8_F5_MANIA	IVW	4	-0.140924	0.187391	0.452031
finngen_R8_M13_BONEDENSOTH	IVW	4	0.249389	0.332515	0.453251
finngen_R8_L12_ERYTHEMAMULTIF	IVW	4	-0.102309	0.136618	0.453938
finngen_R8_VIRALPNEUMONAS	IVW	4	-0.0824786	0.110307	0.454628
finngen_R8_J10_PNEUMONISOLLIQ	IVW	4	-0.11876	0.159301	0.455965
finngen_R8_CD2_BENIGN_HEAMANGIOMA_LYMPHANGIOMA	IVW	4	0.0668157	0.089688	0.456284
finngen_R8_N14_FEMGENPROL	IVW	4	-0.0447058	0.0602279	0.45792
finngen_R8_H8_HL_MIX_NAS	IVW	4	0.0581228	0.078346	0.458164
finngen_R8_M13_OVERUSENAS	IVW	4	-0.117304	0.158294	0.458663
finngen_R8_AB1_SEXUAL_TRANSMISSION_NOS	IVW	4	0.0735681	0.0994128	0.459284
finngen_R8_O15_LABOUR_MALPOS	IVW	4	-0.0149153	0.0201777	0.459787
finngen_R8_K11_MN_RETRGN_AND_SURG	IVW	4	0.162344	0.220101	0.460766
finngen_R8_L12_DERMATITISECZEMA	IVW	4	-0.0278268	0.0377287	0.460787
finngen_R8_CD2_BENIGN_SMALL_INTESTINE	IVW	4	-0.125926	0.170938	0.461319
finngen_R8_T2D	IVW	4	0.0153771	0.020905	0.461994
finngen_R8_N14_FEMALEGENNONINF	IVW	4	-0.024606	0.0334952	0.462576
finngen_R8_AB1_VIRAL_MENINGITIS	IVW	4	0.135569	0.184596	0.4627
finngen_R8_RHEUMA_OTHER_WIDE	IVW	4	0.0433667	0.0591064	0.463128
finngen_R8_I9_HEARTFAIL_AND_CHD	IVW	4	-0.0459375	0.0627458	0.464095
finngen_R8_H7_GLAUCOMAMEDICATION	IVW	4	0.0492448	0.0673328	0.464557
finngen_R8_H7_AMBLYANOPSIA	IVW	3	-0.198789	0.27213	0.465088
finngen_R8_M13_TROCHANTERICBURSITIS	IVW	4	-0.0746678	0.102275	0.465347
finngen_R8_L12_BULLOUS	IVW	4	-0.083113	0.114847	0.469258
finngen_R8_F5_DEMINOTH	IVW	4	-0.185968	0.257095	0.46947
finngen_R8_E4_DM1OPTH	IVW	4	0.0481084	0.0665154	0.469516
finngen_R8_I9_PERICAOTH	IVW	4	-0.158197	0.220271	0.472637
finngen_R8_O15_COMPLIC_PUERP	IVW	4	-0.0529661	0.0740726	0.474574
finngen_R8_M13_MENISCUSDERANGEMENTS	IVW	4	0.0321232	0.0451011	0.476311
finngen_R8_K11_DISLIVOTH	IVW	4	-0.0612066	0.0860132	0.476715
finngen_R8_DM_RETINA_NOS	IVW	4	0.0317841	0.0447086	0.477136
finngen_R8_N14_CHRONKIDNEYDIS	IVW	4	0.0538483	0.0757631	0.477241
finngen_R8_N14_PROSTATITIS	IVW	4	-0.0669234	0.0941897	0.477383
finngen_R8_DENTAL_TMD	IVW	4	-0.0613948	0.0866041	0.478378
finngen_R8_H8_OTHHEARINGLOSS	IVW	4	0.0386102	0.054501	0.478677
finngen_R8_FE_STRICT	IVW	4	0.0846092	0.119594	0.479274
finngen_R8_C3_LIVER_INTRAHEPATIC_BILE_DUCTS_EXALLC	IVW	4	-0.0226778	0.032156	0.48066
finngen_R8_DM_POLYNEURO	IVW	4	-0.0687847	0.0976561	0.481211
finngen_R8_K11_EMBIMPACT_TEETH_INCLAVO	IVW	4	-0.0696867	0.0996124	0.484191
finngen_R8_O15_PREG_GU_INFECT	IVW	4	0.0495942	0.0708952	0.484213
finngen_R8_AB1_ANOGENITAL_HERPES_SIMPLEX	IVW	4	0.0840382	0.120308	0.484849
finngen_R8_NONALLERG_ASTHMA_EXMORE	IVW	4	-0.0507197	0.0728296	0.486168
finngen_R8_M13_IMPINGEMENT	IVW	4	-0.0287235	0.0413411	0.487184
finngen_R8_I9_ARTEMBTHRLOW	IVW	4	-0.213705	0.309247	0.489534
finngen_R8_N14_URINOTH	IVW	4	-0.0100876	0.0146342	0.490624
finngen_R8_D3_COAGDEFNAS	IVW	4	-0.135505	0.197023	0.491603
finngen_R8_N14_CALCULOWER	IVW	4	-0.0940414	0.136917	0.492176
finngen_R8_ILD_INSUFFICIENCY	IVW	4	0.0959121	0.139742	0.492491
finngen_R8_RX_RHEUMA_BIOLOGICAL	IVW	4	-0.0580663	0.0848374	0.493696
finngen_R8_R18_RETEN_URINE	IVW	4	0.0574419	0.084044	0.494307
finngen_R8_NAFLD	IVW	4	-0.0918309	0.134636	0.495196
finngen_R8_CD2_BENIGN_CAECUM	IVW	4	0.0785998	0.115359	0.495651
finngen_R8_D3_AGRANULOCYTOSIS	IVW	4	0.0326467	0.0482302	0.498474
finngen_R8_K11_ORAL	IVW	4	-0.0194147	0.0289391	0.502297
finngen_R8_ALCODELIRIUM	IVW	3	0.0838863	0.125073	0.502413
finngen_R8_O15_POSTPART_DEPR	IVW	3	-0.0473574	0.0707673	0.503368
finngen_R8_N14_DISIMPAIRRENTUB	IVW	4	-0.091834	0.137359	0.503772
finngen_R8_H7_INTERHETEROTRO	IVW	4	0.0862953	0.129252	0.504357
finngen_R8_H7_EYELIDDIS	IVW	4	-0.0262383	0.0393761	0.505187
finngen_R8_C3_STOMACH_EXALLC	IVW	4	0.0714828	0.10742	0.505762
finngen_R8_O15_TWIN_GEST	IVW	4	-0.0585187	0.0880539	0.50632
finngen_R8_E4_PARATHYRO	IVW	4	0.0484279	0.0729408	0.506732
finngen_R8_CD2_BENIGN_TONGUE	IVW	4	0.17356	0.261511	0.506896
finngen_R8_MACULAR_HOLE	IVW	4	-0.10587	0.159889	0.507877
finngen_R8_K11_APHTA_RECUR_INCLAVO	IVW	4	0.0559137	0.084483	0.508078
finngen_R8_M13_DORSALGIANAS	IVW	4	0.0184626	0.0279185	0.508419
finngen_R8_K11_ADHE	IVW	4	0.0662032	0.100296	0.509203
finngen_R8_AB1_ZOSTER	IVW	4	-0.0437215	0.0663246	0.509765
finngen_R8_O15_RETAINED_PLAC_MEMB_NO_HEAMORRH	IVW	4	-0.0541232	0.082224	0.510383
finngen_R8_K11_ORAL_LICHEN_PLANUS_INCLAVO	IVW	4	-0.153786	0.23375	0.510598
finngen_R8_E4_OBESITY	IVW	4	0.0231699	0.0352357	0.510814
finngen_R8_CD2_BENIGN_RECTUM_ANAL	IVW	4	0.0403499	0.0613674	0.510851
finngen_R8_Q17_ASD	IVW	4	0.103083	0.157451	0.512661
finngen_R8_M13_LOWBACKPAIN	IVW	4	-0.0292973	0.044806	0.513196
finngen_R8_ST19_FRACT_NECK	IVW	4	-0.111531	0.170898	0.514002
finngen_R8_Z21_TOBAC_USE	IVW	4	0.0826925	0.126882	0.514576
finngen_R8_M13_PATELLADISLOCATIO	IVW	4	0.0723812	0.111251	0.515298
finngen_R8_AB1_SEQULAE_INF_NOS	IVW	4	-0.0985476	0.151819	0.516265
finngen_R8_M13_PANNICULITIS	IVW	4	0.0825258	0.127544	0.517609
finngen_R8_K11_OTHDISOES	IVW	4	-0.103645	0.160263	0.517816
finngen_R8_DM_NEUROPATHY	IVW	4	0.0631429	0.097696	0.518072
finngen_R8_N14_URETHRALSTRICT	IVW	4	-0.111284	0.172259	0.518262
finngen_R8_AB1_TUBERCU_OTH_ORG	IVW	4	-0.113357	0.175504	0.51835
finngen_R8_L12_CHRONICULCEROFSKIN	IVW	4	-0.143177	0.221676	0.518353
finngen_R8_O15_PUERP_SEPSIS	IVW	4	-0.0790397	0.122539	0.518917
finngen_R8_N14_ENDOMETRIOSIS	IVW	4	0.037995	0.0590009	0.519592
finngen_R8_K11_OTHDISSTOMDUOD	IVW	4	0.0767567	0.120051	0.522583
finngen_R8_L12_FOLLICULARNAS	IVW	4	0.148278	0.233095	0.524693
finngen_R8_H7_RETINOPATHYDIAB_NAS	IVW	4	0.110017	0.173471	0.525944
finngen_R8_H7_RETINOPATHYDIAB_PROLIF	IVW	4	-0.0474092	0.0748326	0.526383
finngen_R8_I9_VASCSYND	IVW	4	0.0695134	0.10981	0.526712
finngen_R8_CD2_BENIGN_ENDOCRINE_OTH	IVW	4	0.0568613	0.0898704	0.526927
finngen_R8_AB1_SEQULEAE_OF_INFECTIONS_AND_PARASITES	IVW	4	-0.11526	0.182299	0.527221
finngen_R8_C3_OVARY_EXALLC	IVW	4	0.0374547	0.059417	0.528453
finngen_R8_AB1_CHOLERA	IVW	4	0.129276	0.205807	0.529912
finngen_R8_AD_AM_EXMORE	IVW	4	-0.0939005	0.149659	0.530378
finngen_R8_H7_VISFIELDDEF	IVW	4	-0.0432624	0.0690548	0.530992
finngen_R8_CD2_BENIGN_LIPO_NOS	IVW	4	0.100772	0.161687	0.533117
finngen_R8_Q17_CONGEN_MALFO_CIRCULATO_SYSTEM	IVW	4	0.0607789	0.0976697	0.533751
finngen_R8_N14_HYPERTROPHYBREAST_BOTH	IVW	4	-0.0736042	0.118784	0.535491
finngen_R8_E4_HYPOKALAEMIA	IVW	4	0.0517115	0.0836381	0.536393
finngen_R8_N14_BARTHOCYS	IVW	4	-0.174285	0.28191	0.536424
finngen_R8_J10_INFLUENZA	IVW	4	0.0395249	0.063969	0.536657
finngen_R8_G6_BELLPA	IVW	4	-0.0506746	0.0820344	0.536757
finngen_R8_K11_ABSCANAL	IVW	4	0.103217	0.167124	0.536834
finngen_R8_O15_MULTIP_GEST	IVW	4	-0.0409134	0.0664452	0.538062
finngen_R8_E4_PCOS	IVW	4	0.0286158	0.0465387	0.538633
finngen_R8_E4_DM2REN	IVW	4	0.0799665	0.130179	0.53903
finngen_R8_N14_OTHPENIS	IVW	4	-0.0790644	0.129028	0.540029
finngen_R8_K11_CHRONPANC	IVW	4	0.0798438	0.130516	0.540701
finngen_R8_L12_OTHPIGMENTATION	IVW	4	-0.184248	0.301474	0.541095
finngen_R8_J10_SIMPLBRONCH	IVW	4	0.0795059	0.130246	0.541578
finngen_R8_O15_MAT_CARE_MALPRESENT	IVW	4	-0.0498635	0.0819119	0.542693
finngen_R8_E4_DMNASNOCOMP	IVW	4	0.0924226	0.151836	0.542724
finngen_R8_H7_ANISOMETROPIA	IVW	4	0.0932602	0.154402	0.545838
finngen_R8_O15_ABORT_UNS	IVW	4	-0.0488243	0.0809627	0.546478
finngen_R8_N14_GENITOUROTH	IVW	4	0.0857491	0.142261	0.546669
finngen_R8_L12_INFECT_DERM	IVW	4	0.0677626	0.11249	0.546916
finngen_R8_K11_OTHENTERCOL	IVW	4	0.0431503	0.0716753	0.547158
finngen_R8_J10_LOWCHRON	IVW	4	-0.0147649	0.0245818	0.548076
finngen_R8_J10_RESPOTHER	IVW	4	0.0601826	0.100692	0.550046
finngen_R8_H8_PERIPHVERTIGO	IVW	4	0.0602382	0.100789	0.550064
finngen_R8_O15_GESTAT_OEDEM_PREINUR	IVW	4	-0.10762	0.180488	0.550994
finngen_R8_H7_RETINAVASC	IVW	4	0.0474804	0.0796458	0.551079
finngen_R8_M13_ARTHROSIS_KNEE	IVW	4	-0.038019	0.0638037	0.551259
finngen_R8_M13_ARTHINOTH	IVW	4	-0.0715827	0.120244	0.551636
finngen_R8_CD2_BENIGN_PAROTID	IVW	4	0.0695999	0.116942	0.551734
finngen_R8_K11_CARIES_DENTIN	IVW	4	-0.0302492	0.050881	0.552173
finngen_R8_ANOSMIA	IVW	4	-0.132245	0.222606	0.552461
finngen_R8_D3_ANAEMIA_IRONDEF_BLOODLOSS	IVW	4	0.0344124	0.0580854	0.553552
finngen_R8_M13_FOREIGNBODY	IVW	4	-0.0810986	0.137276	0.554674
finngen_R8_J10_SEPTDEV	IVW	4	0.0426853	0.0726532	0.556854
finngen_R8_E4_DM2COMA	IVW	4	-0.0622048	0.105881	0.556869
finngen_R8_K11_HYPO_ONLY_INCLAVO	IVW	4	0.0628368	0.10701	0.557065
finngen_R8_K11_JAWS	IVW	4	0.0938781	0.159936	0.557221
finngen_R8_CD2_BENIGN_URINARY	IVW	4	0.125839	0.214549	0.55752
finngen_R8_H7_LIDLACRIMALORBIT	IVW	4	-0.0159581	0.0272223	0.557732
finngen_R8_G6_FEMLAPOP	IVW	4	-0.0632417	0.108288	0.559213
finngen_R8_E4_OVARDYS	IVW	4	-0.0220682	0.0379691	0.561095
finngen_R8_N14_FEMALE_GENITAL_LSIL	IVW	4	0.0496756	0.0859789	0.563423
finngen_R8_G6_ROOTPLEXOTHUNS	IVW	4	-0.0588446	0.102157	0.564602
finngen_R8_G6_HEMIPLE	IVW	4	-0.0998362	0.174492	0.567219
finngen_R8_C3_FEMALE_GENITAL_EXALLC	IVW	4	-0.0275727	0.0482006	0.567295
finngen_R8_H7_CORNULCER	IVW	4	-0.0575476	0.100672	0.567569
finngen_R8_G6_EPLEPSY	IVW	4	0.0643703	0.112776	0.568148
finngen_R8_K11_OPEN_BITE_INCLAVO	IVW	4	0.0838271	0.147142	0.56888
finngen_R8_O15_EXIST_HYPERT_COMPLIC	IVW	4	0.0763886	0.134371	0.569703
finngen_R8_G6_HCNP	IVW	4	0.119088	0.209604	0.569927
finngen_R8_D3_ANAEMIANAS	IVW	4	0.0219909	0.0387168	0.570039
finngen_R8_K11_INTESTOTH	IVW	4	-0.00968746	0.0170629	0.570205
finngen_R8_I9_ANGINA	IVW	3	0.0415897	0.0734243	0.571102
finngen_R8_K11_MISS_TEETH_ACCID_EXTR_PAROD	IVW	4	0.0728186	0.128764	0.571719
finngen_R8_I9_OTHOTH	IVW	4	0.0861337	0.152379	0.571897
finngen_R8_H8_CHOLEASTOMA	IVW	4	0.0371192	0.0657127	0.572161
finngen_R8_N14_OTHNONINFVULV	IVW	4	0.041131	0.0728431	0.572311
finngen_R8_DM_KETOACIDOSIS	IVW	4	0.025474	0.0451965	0.573007
finngen_R8_DEATH	IVW	4	0.0179286	0.0319041	0.574147
finngen_R8_NIV	IVW	3	-0.0464387	0.0827513	0.574672
finngen_R8_E4_DM2NEU	IVW	4	0.081556	0.145357	0.574747
finngen_R8_J10_PNEUMOBACT	IVW	4	-0.0192525	0.0343194	0.574812
finngen_R8_O15_ANTENAT_ABNORM	IVW	4	-0.0373917	0.0669133	0.576293
finngen_R8_F5_OTHERSUB	IVW	4	0.060946	0.10933	0.57722
finngen_R8_N14_UTER_POLYP	IVW	4	0.0432035	0.0775392	0.577403
finngen_R8_E4_DM2OPTH	IVW	4	0.0496155	0.0896106	0.579799
finngen_R8_G6_PARDIPLE	IVW	4	-0.180668	0.326931	0.580525
finngen_R8_H8_EXT_OTH	IVW	4	0.070302	0.127366	0.580969
finngen_R8_M13_ALGONEURO	IVW	4	0.0725343	0.131918	0.582426
finngen_R8_L12_CORNSANDCALLOS	IVW	4	-0.0391273	0.0711842	0.582551
finngen_R8_M13_SACROILIITIS	IVW	4	-0.100568	0.183148	0.58293
finngen_R8_G6_ENCEPHOTH	IVW	4	0.184866	0.336817	0.583101
finngen_R8_INFLUENZA	IVW	4	0.0507644	0.0937078	0.588004
finngen_R8_M13_SYSTCONNECT	IVW	4	0.0304984	0.0565536	0.589691
finngen_R8_M13_DISSYNOTENDNAS	IVW	4	0.135396	0.2515	0.590332
finngen_R8_J10_TONSILLITIS	IVW	4	0.039226	0.0729772	0.590915
finngen_R8_AB1_OTHER_SEPSIS	IVW	4	-0.046119	0.0859551	0.59158
finngen_R8_GRAVES_OPHT	IVW	4	0.161504	0.30222	0.593071
finngen_R8_T1D_STRICT1	IVW	4	0.0419675	0.0787401	0.594042
finngen_R8_K11_OTHGASTR	IVW	4	0.0274626	0.0515608	0.594292
finngen_R8_ALCOHOL_RELATED	IVW	4	-0.0270679	0.0508823	0.594746
finngen_R8_I9_VHD	IVW	4	-0.0168244	0.0316965	0.59556
finngen_R8_I9_IHD	IVW	4	0.0152065	0.0286742	0.59589
finngen_R8_H7_AMD	IVW	3	0.0346993	0.0655581	0.596604
finngen_R8_DM_VITREOUS_BLEEDING	IVW	4	0.0275526	0.0521819	0.597492
finngen_R8_K11_ACUTGASTR	IVW	4	-0.0520677	0.0986604	0.597675
finngen_R8_H8_OTHEREAR	IVW	3	0.036389	0.0689606	0.597722
finngen_R8_D3_PURPURA_AND3_OTHER_HAEMORRHAGIC	IVW	4	0.0663991	0.125844	0.597756
finngen_R8_J10_PNEUMONIA	IVW	4	-0.0158772	0.0301222	0.598129
finngen_R8_M13_MYOSITIS	IVW	4	-0.0806391	0.153668	0.599748
finngen_R8_M13_TRIGGERFINGER	IVW	4	0.0494429	0.0942592	0.599901
finngen_R8_F5_MENTORG	IVW	4	0.0565743	0.108051	0.600564
finngen_R8_E4_THYTOXGOITDIF	IVW	4	0.0698547	0.134327	0.60304
finngen_R8_G6_CPETAL	IVW	4	-0.0729356	0.141736	0.606841
finngen_R8_J10_PNEUMOTHORAX	IVW	4	0.0493163	0.0958598	0.606929
finngen_R8_K11_ORAL_LEUCOPLACIA_INCLAVO	IVW	4	0.108365	0.211082	0.607685
finngen_R8_H8_HL_IDIOP	IVW	4	0.0756098	0.147978	0.609384
finngen_R8_E4_DM2KETO	IVW	4	0.0927331	0.181677	0.609752
finngen_R8_M13_SPONTRUPTSYNOTEND	IVW	4	-0.060231	0.118375	0.610882
finngen_R8_HERING_BILATERAL	IVW	4	0.0719228	0.142338	0.61335
finngen_R8_I9_NONISCHCARDMYOP_STRICT	IVW	4	-0.0797608	0.158747	0.615359
finngen_R8_E4_OBESITYNAS	IVW	4	0.0129583	0.0258153	0.615693
finngen_R8_H7_ALLERGICCONJUNCTIVITIS	IVW	4	-0.0175666	0.0351568	0.617312
finngen_R8_I9_NONRHEVALV	IVW	4	0.0117471	0.0235459	0.617848
finngen_R8_C3_CERVIX_UTERI_EXALLC	IVW	4	0.0351631	0.0706475	0.618677
finngen_R8_K11_CD_STRICT2	IVW	4	0.0668201	0.13445	0.619196
finngen_R8_H8_HL_SEN_NAS	IVW	3	0.0376193	0.0760912	0.621026
finngen_R8_N14_ORHCEPINDIDYMITIS	IVW	4	0.0710816	0.143801	0.62109
finngen_R8_AB1_CANDIDIASIS	IVW	4	0.0571816	0.115887	0.62171
finngen_R8_TEMPOROMANDIB	IVW	4	0.0277514	0.0564347	0.622901
finngen_R8_M13_SOFTTISSUE	IVW	4	-0.00979599	0.0199386	0.623208
finngen_R8_H7_GLAUCCLOSEPRIM	IVW	4	-0.0906154	0.18444	0.623214
finngen_R8_I9_HEARTFAIL_ALLCAUSE	IVW	4	-0.0217308	0.0442438	0.623313
finngen_R8_M13_MYALGIA	IVW	4	-0.0523186	0.106606	0.62359
finngen_R8_K11_IMPACTED_TEETH_INCLAVO	IVW	3	-0.0900369	0.183496	0.623656
finngen_R8_CD2_BENIGN_MENINGES_CEREBRAL	IVW	4	0.0612245	0.125092	0.624533
finngen_R8_I9_HEARTFAIL_AND_OVERWEIGHT	IVW	4	0.0113464	0.0232133	0.624991
finngen_R8_C_STROKE	IVW	4	-0.019973	0.0408703	0.625059
finngen_R8_AB1_GASTROENTERITIS_NOS	IVW	4	0.0121702	0.0249203	0.625291
finngen_R8_GOUT_IDIO	IVW	4	-0.0281781	0.0578264	0.626054
finngen_R8_I9_NONISCHCARDMYOP	IVW	4	-0.0337902	0.0697363	0.628001
finngen_R8_N14_OTHBLADD	IVW	4	0.0167436	0.0346361	0.628801
finngen_R8_BLEEDING	IVW	4	0.0235	0.0491381	0.632477
finngen_R8_O15_GESTAT_HYPERT	IVW	4	-0.0327933	0.0685925	0.632587
finngen_R8_I9_CORATHER	IVW	4	0.0100238	0.0209978	0.633095
finngen_R8_I9_OTHPER	IVW	4	0.0715087	0.149854	0.633227
finngen_R8_N14_NEPHRITICNAS	IVW	4	0.0497682	0.104581	0.63416
finngen_R8_N14_ENDOMETRIOSIS_ASRM_STAGE3_4	IVW	4	0.0343679	0.0722294	0.634206
finngen_R8_ASTHMA_INFECTIONS	IVW	4	0.0184333	0.0388586	0.635236
finngen_R8_OFFICIAL_TILASTOKESKUS_DEATH	IVW	4	-0.0818239	0.172644	0.635538
finngen_R8_O15_OBSTET_TRAUMA_OTHER	IVW	4	0.0167609	0.0356174	0.637939
finngen_R8_M13_SYSTSLCE	IVW	4	0.162275	0.345525	0.638607
finngen_R8_Z21_PROCREATIVE_MANAG	IVW	4	0.0228107	0.0491589	0.642634
finngen_R8_M13_HAMMERTOE	IVW	4	-0.0173034	0.037388	0.643502
finngen_R8_U22_COVID19_SUSPECTED	IVW	4	0.0395338	0.0858072	0.644994
finngen_R8_L12_ACNE	IVW	4	-0.0450177	0.0978228	0.645375
finngen_R8_E4_HYPOPIT	IVW	4	-0.0553176	0.120431	0.645997
finngen_R8_CD2_BENIGN_LEIOMYOMA_UTERI	IVW	4	-0.0131134	0.0285808	0.646365
finngen_R8_G6_MEDLEOTH	IVW	4	-0.0786413	0.171823	0.647177
finngen_R8_G6_NEUROOTH	IVW	4	-0.0714277	0.156404	0.647895
finngen_R8_N14_MESNRUIRREG	IVW	2	-0.0163511	0.0358632	0.64844
finngen_R8_L12_SEBORRKERAT	IVW	4	0.015678	0.0343975	0.648542
finngen_R8_N14_OLIGOMEN	IVW	4	-0.0926446	0.205461	0.652053
finngen_R8_M13_OSTEOCHONDRO	IVW	4	0.0162371	0.0360113	0.65207
finngen_R8_O15_FALSE_LAB	IVW	4	0.0194435	0.0431496	0.652274
finngen_R8_AB1_VIRAL_NOS	IVW	4	-0.0203585	0.0452566	0.652822
finngen_R8_KRA_PSY_SCHIZODEL_EXMORE	IVW	4	-0.0433665	0.0968999	0.654486
finngen_R8_C3_MELANOMA_EXALLC	IVW	4	-0.0595394	0.133298	0.655117
finngen_R8_C3_PANCREAS_EXALLC	IVW	4	0.0527325	0.118276	0.655711
finngen_R8_I9_RHEUVALV	IVW	4	0.113146	0.25485	0.657064
finngen_R8_ASTHMA_NAS	IVW	4	-0.00885666	0.0199701	0.657408
finngen_R8_E4_GOITREDIFF	IVW	4	0.0964433	0.219279	0.660068
finngen_R8_CHRONLARGE	IVW	4	0.0940919	0.214216	0.660489
finngen_R8_O15_PREG_OTHER_MAT_DISORD	IVW	4	0.00682683	0.0155543	0.660732
finngen_R8_F5_STIMUL	IVW	4	-0.113033	0.258526	0.66195
finngen_R8_H8_NOISEINNER	IVW	4	0.101709	0.232768	0.662145
finngen_R8_I9_K_CARDIAC	IVW	4	-0.0137302	0.0315056	0.662982
finngen_R8_ULCERILEO	IVW	4	0.105667	0.24379	0.664698
finngen_R8_E4_LIPOPROTNAS	IVW	4	0.0470821	0.108767	0.665108
finngen_R8_PSORI_STRICT	IVW	3	0.0925083	0.21461	0.66643
finngen_R8_M13_ARTHROSIS_KNEE_PRIM_KNEESURG	IVW	4	-0.0368408	0.0854988	0.666546
finngen_R8_E4_NONTOXIC_THYROID	IVW	4	-0.0275822	0.0641757	0.667347
finngen_R8_E4_THYTOXGOITMULT	IVW	4	0.0621305	0.145355	0.66906
finngen_R8_K11_PANCOTH	IVW	4	-0.0461709	0.108093	0.669278
finngen_R8_I9_VASCDEM	IVW	4	0.111888	0.264504	0.672286
finngen_R8_ASTHMA_ACUTE_RESPIRATORY_INFECTIONS	IVW	4	0.0243115	0.05755	0.672702
finngen_R8_D3_ITP	IVW	4	0.0725342	0.171896	0.67305
finngen_R8_M13_SJOGREN	IVW	4	-0.0492302	0.116951	0.673795
finngen_R8_N14_RENALTUBULOOTH	IVW	4	0.0685602	0.163303	0.674607
finngen_R8_CD2_PRIMARY_LYMPHOID_HEMATOPOIETIC_EXALLC	IVW	4	-0.015256	0.0364543	0.675584
finngen_R8_K11_MAXIL_MOLAR_FAILED_ERUPT_OBSTRUCTION_TOOTH	IVW	4	-0.131586	0.317813	0.678848
finngen_R8_L12_NAIL_INGROW	IVW	4	-0.12035	0.293417	0.681683
finngen_R8_G6_MYOPOTHUNS	IVW	4	-0.0461198	0.112679	0.682318
finngen_R8_L12_IMPETIGO	IVW	4	-0.0931388	0.228146	0.683096
finngen_R8_O15_PREEC_OR_FETGRO	IVW	4	0.0469202	0.115348	0.684177
finngen_R8_K11_OESULC	IVW	4	0.0397659	0.0979041	0.684616
finngen_R8_M13_FIBROBLASTIC	IVW	4	-0.0147081	0.0365109	0.687065
finngen_R8_M13_SCIATICA	IVW	4	0.0149133	0.0370811	0.687551
finngen_R8_DM_PERIPH_ANGIOPATHY	IVW	4	-0.0222892	0.0554245	0.687571
finngen_R8_DRY_AMD	IVW	4	0.0259565	0.0648276	0.688867
finngen_R8_L12_PSORI_VULG	IVW	4	-0.0243386	0.0609709	0.689758
finngen_R8_N14_HYPERTROPHYBREAST	IVW	4	-0.0442645	0.111145	0.690439
finngen_R8_M13_LOWBACKPAINORANDSCIATICA	IVW	4	0.0171507	0.0430747	0.69051
finngen_R8_M13_MUSCLEDISNAS	IVW	3	-0.0799469	0.200808	0.690538
finngen_R8_H8_MENIERE	IVW	4	-0.048355	0.121602	0.690888
finngen_R8_N14_BARTHOOTHNAS	IVW	4	0.0706032	0.179213	0.693608
finngen_R8_F5_VASCDEM	IVW	4	0.0971451	0.24703	0.694133
finngen_R8_I9_CARDMYOOTH	IVW	4	-0.043471	0.110616	0.694328
finngen_R8_CD2_BENIGN_ADRENAL	IVW	4	0.0530966	0.135945	0.696111
finngen_R8_K11_OTHDIG	IVW	4	-0.0213426	0.0546872	0.69634
finngen_R8_C3_URINARY_TRACT_EXALLC	IVW	4	0.0353525	0.0911192	0.69803
finngen_R8_D3_THROMBOCYTOPENIANAS	IVW	4	-0.0776239	0.200536	0.698695
finngen_R8_G6_BRACHPLE	IVW	4	0.0266558	0.0690052	0.699284
finngen_R8_O15_HYPTENSPREG	IVW	4	0.0178912	0.0463806	0.699685
finngen_R8_H7_RETINALBREAK	IVW	4	0.0430485	0.111797	0.700193
finngen_R8_N14_ENDOMETRIOSIS_NOS	IVW	4	0.0394929	0.102805	0.700865
finngen_R8_K11_REIMB_202	IVW	4	0.0117193	0.0306691	0.702373
finngen_R8_CD2_BENIGN_LIPO_SKIN_LIMBS	IVW	4	0.0382086	0.100299	0.703244
finngen_R8_N14_FIANOV	IVW	4	-0.0482761	0.126877	0.703576
finngen_R8_H7_DIVERGSTRAB	IVW	4	-0.0318732	0.0837702	0.703586
finngen_R8_I9_RBBB	IVW	4	-0.0988712	0.259971	0.703711
finngen_R8_J10_PNEUMOPNEUMO	IVW	4	-0.0558484	0.146898	0.703808
finngen_R8_K11_REFLUX	IVW	4	0.0152225	0.0401992	0.704928
finngen_R8_L12_ACTINKERA	IVW	4	0.0187253	0.0494816	0.705112
finngen_R8_ASTHMA_MIXED_EXMORE	IVW	4	0.0594666	0.158863	0.708161
finngen_R8_M13_GLUTEALTEND	IVW	4	-0.0748534	0.200738	0.70923
finngen_R8_L12_PSORI_PUSTUPALM	IVW	4	0.0381919	0.102493	0.709424
finngen_R8_E4_GOITRENOD	IVW	4	0.0381439	0.10273	0.710413
finngen_R8_M13_SPONDYLINFLAMNAS	IVW	4	-0.0298035	0.080289	0.710486
finngen_R8_M13_BONECONTINUITY	IVW	4	0.0692996	0.186884	0.710775
finngen_R8_E4_DM1PERIPH	IVW	4	-0.0842808	0.227545	0.71109
finngen_R8_J10_UPPERINFEC	IVW	3	0.0210841	0.0571107	0.711994
finngen_R8_M13_SOFTTISSUENAS	IVW	4	0.0491122	0.133311	0.712572
finngen_R8_G6_SPINOTH	IVW	4	0.0744332	0.202194	0.712778
finngen_R8_N14_FIOTHNAS	IVW	3	-0.0208393	0.0569986	0.714656
finngen_R8_N14_PYELONEPHR	IVW	4	0.0223559	0.0612604	0.715162
finngen_R8_L12_ALLERGICCONTACT	IVW	4	-0.0136313	0.0373897	0.715431
finngen_R8_K11_LIVER	IVW	4	-0.0281118	0.0773385	0.716239
finngen_R8_AB1_OTHER_VIRAL	IVW	4	0.019279	0.0530422	0.716257
finngen_R8_C3_COLORECTAL_EXALLC	IVW	4	-0.0208417	0.0575928	0.717441
finngen_R8_I9_UAP	IVW	4	0.0192675	0.0532701	0.71758
finngen_R8_J10_PYOTHORAX	IVW	4	0.0362445	0.10027	0.717749
finngen_R8_H7_RETINALDETACHOTH	IVW	4	-0.08989	0.249903	0.719072
finngen_R8_THYROTOXICOSIS	IVW	4	0.0316904	0.0882865	0.719633
finngen_R8_K11_DIVERTIC	IVW	4	0.0155625	0.0433645	0.719687
finngen_R8_O15_OTHER_MATERN_DIS_ELSEWHERE	IVW	4	-0.0150044	0.0419807	0.720784
finngen_R8_I9_HYPOTE	IVW	4	-0.0301762	0.0844401	0.720816
finngen_R8_N14_MENORRHAGIA	IVW	4	0.0226851	0.063653	0.72155
finngen_R8_ALCOHOLACUTE10	IVW	4	0.0410447	0.11526	0.721761
finngen_R8_K11_ORALCYST	IVW	4	-0.0915669	0.260907	0.725621
finngen_R8_E4_DM1NEU	IVW	4	-0.0353491	0.100887	0.72605
finngen_R8_KRA_PSY_CHILDEMOT_EXMORE	IVW	4	0.048514	0.138597	0.72631
finngen_R8_I9_CARDMYO	IVW	4	-0.0321582	0.0924214	0.727877
finngen_R8_H7_CONJUNCTDEGDEPOT	IVW	4	-0.0979435	0.282501	0.728815
finngen_R8_F5_OPIOIDS	IVW	4	-0.0641121	0.184935	0.728836
finngen_R8_E4_DM2PERIPH	IVW	4	-0.0455084	0.132861	0.731955
finngen_R8_H7_BLEPHAROCHALASIS	IVW	4	-0.0177584	0.0520721	0.733078
finngen_R8_C3_MELANOMA_SKIN_EXALLC	IVW	4	-0.0373174	0.110043	0.734522
finngen_R8_ASTHMA_OPPORTUNIST_INFECTIONS	IVW	4	-0.0501967	0.14854	0.735413
finngen_R8_H8_CHRON_SUPOTITIS	IVW	4	-0.0329231	0.0979311	0.736731
finngen_R8_CD2_BENIGN_EAR_RESP	IVW	4	0.0118517	0.0353463	0.737398
finngen_R8_M13_METATARSALGIA	IVW	4	-0.0420598	0.126051	0.738627
finngen_R8_J10_ASTHMACOPDKELA	IVW	4	-0.00824323	0.0247339	0.738926
finngen_R8_ST19_FRACT_WRIST_HAND_LEVEL	IVW	4	-0.0228624	0.0686992	0.739293
finngen_R8_PRIM_KNEEARTHROSIS	IVW	4	-0.0112024	0.0337601	0.740023
finngen_R8_I9_AVBLOCK	IVW	4	0.0186406	0.0563662	0.740867
finngen_R8_CD2_BENIGN_ANUS_ANAL_CANAL	IVW	4	-0.0667783	0.202648	0.741756
finngen_R8_COPD_LATER	IVW	4	-0.0258194	0.0784021	0.741914
finngen_R8_H8_VERTIGO	IVW	4	0.0117805	0.035794	0.742066
finngen_R8_I9_HEARTFAIL_EXMORE	IVW	4	-0.0156545	0.0475908	0.742201
finngen_R8_HERING_UNILATERAL	IVW	4	-0.0869995	0.264753	0.742453
finngen_R8_CD2_BENIGN_UTERUS_OTH	IVW	4	0.0176868	0.0544022	0.745096
finngen_R8_G6_STATUSEPI	IVW	4	0.0545788	0.16942	0.747339
finngen_R8_CD2_BENIGN_DUODENUM	IVW	4	-0.0614263	0.192012	0.749037
finngen_R8_N14_OBSTRUREFLUROPATH	IVW	4	-0.0158113	0.0497085	0.750424
finngen_R8_H8_EXTOTITIS	IVW	4	-0.0109709	0.0345695	0.750971
finngen_R8_J10_INFLUPNEU	IVW	4	-0.00931015	0.0297261	0.75413
finngen_R8_K11_ATTRITION	IVW	4	-0.069889	0.224953	0.756041
finngen_R8_AUTOIMMUNE	IVW	4	-0.00900994	0.0290772	0.756666
finngen_R8_G6_PLANTAR	IVW	2	-0.0422599	0.136828	0.757433
finngen_R8_M13_OSTEOMYELITIS	IVW	3	0.0418138	0.13725	0.760629
finngen_R8_E4_HYPERPRO	IVW	4	0.052902	0.174026	0.761136
finngen_R8_O15_MEMBR_PREMAT_RUPT	IVW	4	0.0183086	0.0604798	0.762101
finngen_R8_O15_MATERN_CARE_PELVIC_ABNORM	IVW	4	-0.00312989	0.0103743	0.762885
finngen_R8_F5_DEMENTIA_INCLAVO	IVW	4	-0.0262234	0.0869552	0.762977
finngen_R8_G6_POSTOPNEURO	IVW	4	0.0382159	0.12681	0.763138
finngen_R8_N14_CERVICAL_HSIL	IVW	4	0.0236738	0.0785939	0.76325
finngen_R8_L12_EPIDERMTHICKNAS	IVW	4	0.0733713	0.24371	0.763369
finngen_R8_CHRONNAS	IVW	4	0.0449759	0.150746	0.765433
finngen_R8_O15_EXCESS_VOMIT_PREG	IVW	4	0.0520359	0.1745	0.76555
finngen_R8_CD2_FOLLICULAR_LYMPHOMA_EXALLC	IVW	4	0.0402691	0.13571	0.766673
finngen_R8_O15_PREECLAMPS	IVW	4	0.0325603	0.110456	0.76816
finngen_R8_I9_VARICVESOTH	IVW	4	0.0317524	0.108156	0.76908
finngen_R8_AB1_VIRAL_OTHER_INTEST_INFECTIONS	IVW	3	0.0196058	0.0668201	0.769208
finngen_R8_ST19_FRACT_FOOT_ANKLE	IVW	4	0.0219528	0.0751497	0.770195
finngen_R8_E4_OBESITYCAL	IVW	4	0.0126621	0.0434048	0.7705
finngen_R8_N14_ENDOMETRIOSIS_RECTPVAGSEPT_VAGINA	IVW	4	-0.0116738	0.0402608	0.771851
finngen_R8_L12_HYPETROPHICSCAR	IVW	4	0.0546455	0.18913	0.772634
finngen_R8_L12_CELLULITIS	IVW	4	-0.0251071	0.0873644	0.773818
finngen_R8_CD2_BENIGN_HEMANGIOMA	IVW	4	0.0229023	0.0800289	0.774744
finngen_R8_K11_FISTULA	IVW	4	0.0150308	0.0526198	0.775147
finngen_R8_N14_EROSECTROPUT	IVW	4	-0.0447399	0.160305	0.780174
finngen_R8_K11_MALABSORB	IVW	4	-0.0247161	0.0886201	0.780322
finngen_R8_CD2_BENIGN_UTERUS_NOS	IVW	4	0.0133941	0.0483639	0.781823
finngen_R8_H7_VISUDISTURBSUB	IVW	4	-0.0243765	0.0882938	0.782483
finngen_R8_ST19_FRACT_SKULL_FACIAL_BONES	IVW	2	0.0196968	0.0714167	0.782701
finngen_R8_I9_HYPTENSEC	IVW	4	-0.0496965	0.180272	0.782797
finngen_R8_I9_CVD_HARD	IVW	4	0.0136251	0.0494283	0.782814
finngen_R8_M13_SPININSTAB	IVW	4	-0.0453999	0.165886	0.784329
finngen_R8_KRA_PSY_EATING_EXMORE	IVW	4	0.0251193	0.0925356	0.78604
finngen_R8_N14_AMENORRHEAPRIM	IVW	4	0.032953	0.1227	0.788264
finngen_R8_J10_EMPHYSEMA	IVW	4	-0.0345893	0.128869	0.788386
finngen_R8_C3_BREAST_HER2NEG_EXALLC	IVW	4	0.0107402	0.0404925	0.790825
finngen_R8_TBC_RESP	IVW	4	-0.029103	0.109984	0.79131
finngen_R8_G6_SLEEPDISOTH	IVW	4	-0.0188277	0.0712839	0.791686
finngen_R8_M13_ROTATORCUFF	IVW	4	-0.00728385	0.0275892	0.791772
finngen_R8_H7_VITROTH	IVW	3	0.0239415	0.0907049	0.791819
finngen_R8_VD_U	IVW	4	0.0777878	0.296292	0.792907
finngen_R8_I9_VEINSOTH	IVW	3	-0.0138446	0.0529489	0.793729
finngen_R8_E4_DM1NASCOMP	IVW	4	0.0177547	0.0679868	0.793978
finngen_R8_H7_ECTROPION	IVW	4	0.0554431	0.213991	0.795565
finngen_R8_AB1_OTHER_INFECTIONS	IVW	4	0.0453012	0.175973	0.796845
finngen_R8_CD2_BENIGN_BRAIN_CNS	IVW	4	-0.03044	0.118572	0.797393
finngen_R8_D3_OTHERBLOOD	IVW	3	0.0474572	0.185247	0.79781
finngen_R8_F5_ALCOHOLAC	IVW	4	0.0198492	0.0776498	0.79824
finngen_R8_ALLERGIC_CONTACT_DERMA_DRUGS_CONTACT_W_SKIN	IVW	4	0.0704887	0.277032	0.799154
finngen_R8_H7_IRIDOCHRONIC	IVW	4	-0.0277327	0.110283	0.801452
finngen_R8_AB1_VIRAL_SKIN_NOS	IVW	4	-0.0235528	0.0939981	0.802149
finngen_R8_J10_LOWERINF	IVW	4	-0.00881308	0.0354866	0.803864
finngen_R8_H7_PTERYGIUM	IVW	4	0.0549858	0.222201	0.804552
finngen_R8_N14_CYSTKID	IVW	4	0.0280659	0.113832	0.805252
finngen_R8_E4_HYPERPARA	IVW	4	0.0213208	0.0867361	0.805828
finngen_R8_KELA_DIAB_INSUL_EXMORE	IVW	4	0.00228051	0.00936117	0.80753
finngen_R8_AD_EO_EXMORE	IVW	4	-0.0385152	0.158747	0.808299
finngen_R8_H7_OCUMUSCLE	IVW	4	-0.0100647	0.0416121	0.808881
finngen_R8_ASTHMA_CHILD_EXMORE	IVW	4	0.0102787	0.0428463	0.81041
finngen_R8_L12_OTHERCONTACT	IVW	4	-0.0155172	0.0648382	0.810856
finngen_R8_ALLERG_RHINITIS	IVW	4	0.00916757	0.0384363	0.811483
finngen_R8_H7_STRABOTH	IVW	4	0.0116931	0.049376	0.812798
finngen_R8_J10_CHRONLARYNGITIS	IVW	4	0.0284938	0.120925	0.813719
finngen_R8_K11_DISTAL_BITE_INCLAVO	IVW	4	-0.0600562	0.256658	0.81499
finngen_R8_M13_RECUDISLOCATIO	IVW	4	0.0467185	0.2014	0.816562
finngen_R8_TRAUMBRAIN_NONCONCUS	IVW	3	-0.0294998	0.127325	0.81678
finngen_R8_F5_NEUROTICOTH	IVW	4	0.0239813	0.103615	0.816968
finngen_R8_E4_MINERAL_MET	IVW	4	0.0166819	0.072213	0.817308
finngen_R8_L12_PRURITUS	IVW	4	0.0152194	0.0659668	0.817538
finngen_R8_K11_DEPOSITS	IVW	4	-0.0303963	0.13227	0.818243
finngen_R8_J10_ACUTEUPPERINFEC	IVW	3	-0.00931261	0.040735	0.819169
finngen_R8_K11_ORAL_LEUCOPLAC_RELAT	IVW	4	0.00988491	0.0432538	0.819232
finngen_R8_G6_MYONEU	IVW	4	0.0214975	0.0941799	0.819444
finngen_R8_RHINITIS_VASOMOTOR	IVW	4	0.0407635	0.179699	0.820545
finngen_R8_O15_BIRTH_BREAT_INFECT	IVW	4	0.0468667	0.207497	0.821305
finngen_R8_N14_BREAST	IVW	4	-0.0080929	0.0358851	0.821573
finngen_R8_H7_MODVISIMPBINOC	IVW	4	-0.0514067	0.230098	0.823215
finngen_R8_KRA_PSY_BEHAV_EXMORE	IVW	4	-0.0545804	0.24619	0.824547
finngen_R8_N14_IMPOTENCE	IVW	4	0.0289321	0.13061	0.824691
finngen_R8_OTHER_SYSTCON_FG	IVW	4	0.0221896	0.100588	0.825406
finngen_R8_J10_CHRONRHINITIS	IVW	4	-0.0158346	0.0724566	0.827009
finngen_R8_O15_PUERP_COMPL_NAS	IVW	4	0.0599838	0.274989	0.827326
finngen_R8_O15_LABOUR_UMBILICAL	IVW	4	-0.0551436	0.252938	0.82742
finngen_R8_H7_VITRBODYGLOBE	IVW	4	-0.0136759	0.0636519	0.829881
finngen_R8_CD2_HODGKIN_LYMPHOMA_EXALLC	IVW	4	-0.0362064	0.169578	0.83093
finngen_R8_G6_SCIALE	IVW	4	0.0270806	0.127126	0.83131
finngen_R8_E4_GOITRENAS	IVW	4	-0.0226218	0.106758	0.832186
finngen_R8_K11_OTHINFLIV	IVW	4	-0.0315227	0.149764	0.833291
finngen_R8_Q17_CONGEN_MALFO_DEFORMAT_MUSCULOS_SYSTEM	IVW	4	-0.0246548	0.117335	0.833571
finngen_R8_AUTOIMMUNE_NONTHYROID_STRICT	IVW	4	-0.00855799	0.0408797	0.834178
finngen_R8_M13_ENTESOPATHYNAS	IVW	2	-0.0231068	0.110979	0.835065
finngen_R8_K11_HERING	IVW	3	0.00831098	0.0401382	0.835964
finngen_R8_FE_MODE	IVW	4	0.0285491	0.138605	0.83681
finngen_R8_C3_KIDNEY_NOTRENALPELVIS_EXALLC	IVW	4	-0.0479349	0.233988	0.837681
finngen_R8_F5_DELIRIUM	IVW	4	-0.0111338	0.0545677	0.838325
finngen_R8_K11_PERITONITIS	IVW	4	0.0319682	0.156788	0.838436
finngen_R8_C3_MENINGES_EXALLC	IVW	4	0.0537909	0.26507	0.839189
finngen_R8_M13_ARTHROSIS_OTH	IVW	4	-0.0159754	0.0790284	0.839801
finngen_R8_H8_OTIMEDNAS	IVW	4	0.024837	0.122999	0.839973
finngen_R8_CD2_BENIGN_MENINGES	IVW	4	0.0247638	0.122899	0.840309
finngen_R8_I9_OTHANEUR	IVW	4	0.0460382	0.228883	0.840587
finngen_R8_DM_HYPOGLYC	IVW	4	0.0217923	0.108976	0.841502
finngen_R8_K11_HEPFAIL	IVW	4	-0.0364853	0.186393	0.844811
finngen_R8_J10_VIRALPNEUMO	IVW	4	-0.0185223	0.0946311	0.84482
finngen_R8_M13_HALLUXRIGIDUS	IVW	4	-0.0162734	0.0843201	0.846963
finngen_R8_PULM_INFECTIONS	IVW	4	-0.00654977	0.0341118	0.847735
finngen_R8_L12_INFECT_SKIN_OTHER	IVW	4	-0.0159084	0.0832617	0.848475
finngen_R8_SPONDYLOPATHY_FG	IVW	4	-0.0185593	0.0972423	0.848638
finngen_R8_CAMPYLOENTERITIS	IVW	4	0.0431953	0.226971	0.849065
finngen_R8_I9_VARICVE	IVW	4	-0.00823755	0.0432905	0.849086
finngen_R8_J10_CHRONTONSADEN	IVW	3	0.00760982	0.0400377	0.849257
finngen_R8_F5_SLEEP_NOS	IVW	4	0.0309419	0.163294	0.849712
finngen_R8_N14_OTHDISMALEGEN	IVW	3	0.0361097	0.190997	0.850046
finngen_R8_M13_DORSALGIA	IVW	4	-0.00496353	0.0269238	0.853735
finngen_R8_I9_VTE	IVW	4	-0.00742508	0.0405266	0.854629
finngen_R8_J10_COLD	IVW	4	-0.0109755	0.0604908	0.856022
finngen_R8_G6_ALZHEIMER	IVW	4	0.0159131	0.0880036	0.856506
finngen_R8_CD2_BENIGN_LIPO_SKIN_HEADFACENECK	IVW	4	0.0165998	0.0920516	0.856893
finngen_R8_Q17_CRANIOSYNOSTOSIS	IVW	4	-0.0318584	0.177097	0.857237
finngen_R8_K11_APPENDACUT	IVW	4	0.00792476	0.0443407	0.858154
finngen_R8_MEMLOSS	IVW	4	0.0191196	0.109268	0.861096
finngen_R8_K11_POSTOPDIS	IVW	4	0.0363404	0.2108	0.863129
finngen_R8_K11_TEETH_HARD	IVW	4	0.0223791	0.130012	0.863335
finngen_R8_K11_OTHDISDIG	IVW	4	0.013763	0.0801023	0.863581
finngen_R8_H7_RETINOPATHYDIAB_BKG	IVW	4	0.0164093	0.0955153	0.863597
finngen_R8_KRA_PSY_ALCOH_EXMORE	IVW	4	0.0139171	0.0814134	0.864268
finngen_R8_ALCOPANCACU	IVW	4	0.034076	0.199371	0.864288
finngen_R8_F5_BULIMIA	IVW	4	-0.0413528	0.245808	0.866401
finngen_R8_K11_CARIES_1_ONLYAVO	IVW	4	-0.00296721	0.0176792	0.866713
finngen_R8_RX_CROHN_1STLINE	IVW	4	-0.00243871	0.0146095	0.867428
finngen_R8_L12_DERMATITISNAS	IVW	4	0.00631488	0.0391286	0.871788
finngen_R8_I9_ANEURYSM	IVW	4	-0.0233719	0.145337	0.872241
finngen_R8_K11_CARIES_2	IVW	4	0.00675795	0.042084	0.872422
finngen_R8_IPF	IVW	4	-0.0216984	0.135662	0.872925
finngen_R8_H7_BLINDANDVISIMPAIRMENT	IVW	4	-0.0260679	0.165702	0.874994
finngen_R8_M13_EARLY_LUMBAR_PROLAPSE	IVW	4	-0.0121239	0.0783878	0.877085
finngen_R8_M13_KNEEDERANGEMENTS	IVW	4	0.00732346	0.0479421	0.87859
finngen_R8_H7_STENOLACRI	IVW	4	-0.0143767	0.094132	0.878612
finngen_R8_K11_ALCOLIV	IVW	4	-0.0181343	0.118961	0.87884
finngen_R8_G6_SLEEPAPNO	IVW	4	-0.00463093	0.0303824	0.878855
finngen_R8_COPD_MODE	IVW	3	0.0131333	0.0863962	0.879177
finngen_R8_C3_LIP_ORAL_PHARYNX_EXALLC	IVW	4	-0.00976338	0.0652986	0.881144
finngen_R8_E4_HYTHYNAS	IVW	4	-0.00563995	0.0377636	0.881278
finngen_R8_D3_WHITEBLOODCELLNAS	IVW	4	-0.0201014	0.134724	0.881393
finngen_R8_I9_CONDUCTIO	IVW	4	-0.00560376	0.0376388	0.881646
finngen_R8_CD2_BENIGN_MELANOCYTIC_LOWERLIMB	IVW	4	0.032088	0.215853	0.881824
finngen_R8_N14_VAGINAL_DYSPLASIA_ALL	IVW	3	0.0858423	0.578893	0.882116
finngen_R8_ST19_TOXIC_EFFECT_ALCOHOL	IVW	4	-0.0259957	0.176545	0.882937
finngen_R8_N14_ENDOMETRIOSIS_OVARY	IVW	3	0.0147526	0.100371	0.883147
finngen_R8_J10_BRONCHITIS	IVW	4	-0.00619319	0.0422107	0.883352
finngen_R8_M13_POSTOPMUSCULOSKE	IVW	4	0.0137054	0.0940334	0.884119
finngen_R8_M13_OSTEOPOROSIS	IVW	4	-0.00845433	0.0580063	0.88412
finngen_R8_M13_SPONDYLOLISTHESIS	IVW	4	0.0101057	0.0705782	0.886145
finngen_R8_F5_ALZHDEMENT	IVW	4	-0.0238232	0.166637	0.886318
finngen_R8_CD2_BENIGN_STOMACH	IVW	4	0.00805085	0.0564333	0.886558
finngen_R8_M13_ARTHROPATHIES	IVW	4	-0.00554796	0.0391579	0.887331
finngen_R8_M13_SPONDYLOPATHYNAS	IVW	4	0.015894	0.112248	0.887398
finngen_R8_K11_DULC	IVW	4	0.0173636	0.123444	0.888139
finngen_R8_J10_PLEURA	IVW	4	0.00661	0.0471931	0.88861
finngen_R8_E4_GOITREMULTINOD	IVW	4	0.0148159	0.106291	0.889143
finngen_R8_D3_COAGOTHER	IVW	4	0.0118503	0.0850479	0.889184
finngen_R8_H7_EYEOTH	IVW	4	0.0131365	0.0946758	0.889646
finngen_R8_Q17_OTHER_CONGEN_MALFO_FACE_NECK	IVW	4	-0.0330536	0.238411	0.889733
finngen_R8_E4_DMNASNASCOMP	IVW	2	-0.0482687	0.348995	0.889997
finngen_R8_N14_CYSTITIS	IVW	4	0.00501214	0.036268	0.890084
finngen_R8_H8_VESTIFUNCNAS	IVW	4	0.0338028	0.244718	0.890138
finngen_R8_H8_BPV	IVW	4	0.0140376	0.102337	0.890896
finngen_R8_N14_BREASTDISOTH	IVW	4	0.0141747	0.103711	0.891288
finngen_R8_K11_ILEUS	IVW	4	-0.0078793	0.0585281	0.892909
finngen_R8_E4_PCOS_CONCORTIUM	IVW	4	-0.005683	0.0422207	0.892926
finngen_R8_O15_PRE_OR_ECLAMPSIA	IVW	4	-0.0145761	0.108876	0.893499
finngen_R8_G6_AD_WIDE	IVW	4	-0.012359	0.0936082	0.894961
finngen_R8_C3_BREAST_EXALLC	IVW	4	0.00355571	0.0272887	0.896329
finngen_R8_I9_ATHSCLE	IVW	4	-0.0066204	0.0510898	0.896896
finngen_R8_O15_AMNIOT_OTHER	IVW	4	0.00826058	0.0638703	0.897094
finngen_R8_F5_CANNABIS	IVW	4	-0.0378539	0.292911	0.897173
finngen_R8_Q17_CONGEN_MALFO_GREAT_ARTERIES	IVW	4	0.0299752	0.238361	0.899925
finngen_R8_I9_HYPTENSRD	IVW	4	-0.0302544	0.240829	0.900028
finngen_R8_F5_DEMNAS	IVW	4	0.0133597	0.10982	0.903176
finngen_R8_DM_RET_VEIN_OCCLU	IVW	4	-0.0223314	0.185607	0.904233
finngen_R8_M13_DEQUERVAIN	IVW	4	0.0126847	0.106554	0.90524
finngen_R8_M13_DORSOPATHYNAS	IVW	3	0.0313918	0.277635	0.909976
finngen_R8_K11_OTHILEUS	IVW	4	0.0121081	0.111446	0.913483
finngen_R8_I9_HEARTFAIL_NS	IVW	4	0.00560116	0.0521983	0.914547
finngen_R8_L12_LUPUS	IVW	4	-0.0280805	0.261798	0.914582
finngen_R8_M13_POLYMYALGIA	IVW	4	0.0146746	0.137315	0.914893
finngen_R8_I9_MYOCARD	IVW	4	-0.0105466	0.0994395	0.915534
finngen_R8_M13_OTHERJOINT	IVW	4	-0.0044904	0.0425848	0.916022
finngen_R8_AB1_RESP_TUBERCU_NONCONF	IVW	4	0.0147245	0.140262	0.916393
finngen_R8_E4_ENDODIS	IVW	4	0.0163771	0.156755	0.916792
finngen_R8_ILD	IVW	4	0.0137931	0.132781	0.917266
finngen_R8_ILD_ENDPOINTS	IVW	4	0.0137931	0.132781	0.917266
finngen_R8_J10_LARYNGITIS	IVW	4	0.00954543	0.093298	0.91851
finngen_R8_G6_MENINGBACT	IVW	4	-0.00922773	0.0919444	0.920057
finngen_R8_CD2_BENIGN_EAR_NASAL_SINUS	IVW	4	0.0104755	0.105396	0.920827
finngen_R8_F5_DELUSIO	IVW	4	0.0192936	0.196678	0.921855
finngen_R8_F5_GAD	IVW	4	0.00887741	0.0909048	0.922205
finngen_R8_BRONCHITIS	IVW	4	-0.00444708	0.0461776	0.923279
finngen_R8_E4_FH_IHD	IVW	4	0.00648811	0.0675238	0.923452
finngen_R8_K11_ERUPTION_INCLAVO	IVW	4	-0.00645523	0.0684307	0.924845
finngen_R8_M13_THORACISPINEPAIN	IVW	4	0.0133601	0.142459	0.925282
finngen_R8_E4_PCOS_BROAD	IVW	4	0.00732055	0.0780666	0.925289
finngen_R8_Q17_VACTREL	IVW	4	0.00670853	0.071636	0.925389
finngen_R8_N14_FEMALEINFERT	IVW	3	-0.00499806	0.0534402	0.925485
finngen_R8_D3_ACQHAEMOLYTICANAEMIA	IVW	4	0.0128254	0.138257	0.926091
finngen_R8_H7_PRESBYOPIA	IVW	4	0.0117023	0.127802	0.927043
finngen_R8_N14_OVARYCYST	IVW	4	-0.00245717	0.0271317	0.927839
finngen_R8_C3_SCLC_EXALLC	IVW	4	-0.0269547	0.299176	0.928211
finngen_R8_PNEUMO_SEPTHICHE	IVW	4	0.00977178	0.108558	0.928276
finngen_R8_D3_SCNDPOLYCYTHAEMIA	IVW	4	0.0248233	0.276597	0.92849
finngen_R8_H7_REFRAACCOMMODIS	IVW	4	-0.00852321	0.0965047	0.929623
finngen_R8_J10_UPPERDIS	IVW	3	-0.00273183	0.0315412	0.93098
finngen_R8_RHEUMA_SERONEG	IVW	4	-0.00472322	0.0547106	0.931203
finngen_R8_K11_EMBED_TEETH_INCLAVO	IVW	4	-0.00809348	0.094601	0.931821
finngen_R8_L12_DECUBITANSULCERANDPRESSURE	IVW	4	-0.0107972	0.126508	0.931985
finngen_R8_O15_ABORT_SPONTAN	IVW	4	-0.00295171	0.0348236	0.932451
finngen_R8_K11_FEMHER	IVW	4	-0.0212706	0.251407	0.932574
finngen_R8_CHOLELITH_BROAD	IVW	4	0.00356131	0.042471	0.933173
finngen_R8_H8_MIDDLEMASTOID	IVW	4	-0.00188733	0.0228569	0.934192
finngen_R8_H7_OCUPAIN	IVW	4	-0.00600047	0.0736094	0.93503
finngen_R8_RX_CROHN_2NDLINE	IVW	4	-0.00505374	0.0635127	0.936579
finngen_R8_AUTOIMMUNE_NONTHYROID	IVW	4	-0.0029846	0.0378827	0.937203
finngen_R8_L12_URTICA_NAS	IVW	3	-0.00769983	0.0998181	0.938513
finngen_R8_K11_OTHANRECT	IVW	4	-0.00459353	0.0602453	0.939223
finngen_R8_E4_THYROID	IVW	3	0.00290628	0.0386382	0.940041
finngen_R8_CHRONSMALL	IVW	4	-0.00890654	0.119144	0.94041
finngen_R8_AB1_EBV	IVW	3	-0.0169391	0.227718	0.940703
finngen_R8_N14_FITUB	IVW	4	-0.0139588	0.189482	0.941274
finngen_R8_F5_DEMENTIA	IVW	4	-0.00638782	0.0869555	0.941439
finngen_R8_T1D_WIDE	IVW	4	0.00348189	0.0483761	0.942622
finngen_R8_J10_COPD	IVW	3	-0.00534892	0.0753464	0.943405
finngen_R8_G6_FACOTH	IVW	4	0.0119227	0.168579	0.943617
finngen_R8_RHEUMA_SEROPOS_WIDE	IVW	4	0.00562	0.080175	0.944117
finngen_R8_E4_ENDOGLAND	IVW	4	-0.00345288	0.0497968	0.944719
finngen_R8_L12_EPIDERMALTHICKOTH	IVW	4	0.0140462	0.202832	0.94479
finngen_R8_L12_INTERNALSUBSTANCEDERM	IVW	4	-0.00838413	0.125668	0.946807
finngen_R8_M13_ANKYLOSPON_STRICT	IVW	4	0.0108689	0.163018	0.946842
finngen_R8_H7_EYELIDINFLAMMATION	IVW	4	-0.00555738	0.0843962	0.947498
finngen_R8_J10_TONSILLECTOMY	IVW	2	0.00234027	0.0380792	0.950994
finngen_R8_K11_CHOLECYSTECTOMY	IVW	4	-0.00440874	0.0718252	0.951055
finngen_R8_O15_LABOUR_INTRAPART_HAEMORRH	IVW	4	-0.0058808	0.0998149	0.953018
finngen_R8_G6_CARPTU	IVW	4	0.00290134	0.0496959	0.953444
finngen_R8_COPD_EARLY	IVW	4	-0.00556766	0.0969825	0.95422
finngen_R8_C3_COLON_ADENO_EXALLC	IVW	4	-0.00431952	0.0754023	0.954317
finngen_R8_K11_CHOLELITH	IVW	4	-0.00235722	0.0413451	0.954535
finngen_R8_H7_ASTIGMATISM	IVW	4	-0.0101546	0.17873	0.954692
finngen_R8_D3_BLOODOTHER	IVW	4	-0.00412273	0.0733261	0.955163
finngen_R8_M13_RHEUMA	IVW	4	0.00405571	0.0741893	0.956404
finngen_R8_AB1_VIRAL_HEMOR_FEVER_NOS	IVW	4	0.00340981	0.0665015	0.959107
finngen_R8_D3_BLOODNAS	IVW	3	0.0117375	0.229519	0.959214
finngen_R8_G6_OTHNEU	IVW	4	0.00116637	0.0244834	0.962004
finngen_R8_VOCALCORDDYS	IVW	4	-0.00835755	0.178608	0.962679
finngen_R8_H7_VISDISTNAS	IVW	4	-0.00862833	0.188863	0.963561
finngen_R8_L12_BULLOTH	IVW	4	0.013258	0.291176	0.963683
finngen_R8_H7_CATARACTOTHER	IVW	4	0.00225296	0.050075	0.964114
finngen_R8_N14_INFCERVIX	IVW	4	-0.00566483	0.125957	0.964128
finngen_R8_CHRONOTH	IVW	4	-0.00568336	0.130117	0.96516
finngen_R8_E4_HYPERALDO	IVW	4	0.0134505	0.310014	0.965393
finngen_R8_N14_KIDUROTH	IVW	4	0.00247994	0.0625683	0.968384
finngen_R8_GENERALI_SKIN_ERUPT_DRUGS_MEDICAM	IVW	4	-0.00915834	0.237766	0.969274
finngen_R8_AD_LO_EXMORE	IVW	4	0.00268275	0.0711942	0.969941
finngen_R8_K11_APPENDOTH	IVW	4	0.00255338	0.0687575	0.970377
finngen_R8_MYELOPROF_NONCML	IVW	4	0.00263395	0.0730179	0.971224
finngen_R8_C3_RECTUM_EXALLC	IVW	4	-0.00528999	0.152724	0.972369
finngen_R8_I9_DVTANDPULM	IVW	4	-0.00115955	0.0340705	0.97285
finngen_R8_L12_HIDRADENITISSUP	IVW	4	-0.00770944	0.241252	0.974507
finngen_R8_T1D_EARLY	IVW	4	-0.0030858	0.100787	0.975575
finngen_R8_N14_VULVOVAGINFINOTH	IVW	4	0.00623138	0.213691	0.976736
finngen_R8_N14_OTHNONINFCERVIX	IVW	4	0.00234654	0.0812308	0.976954
finngen_R8_RHEUMA_SEROPOS	IVW	4	-0.00234408	0.0832797	0.977545
finngen_R8_M13_SCOLIOSIS	IVW	4	0.00163666	0.0583777	0.977634
finngen_R8_CD2_BENIGN_MOUTH_NOS	IVW	4	0.00440338	0.173921	0.979801
finngen_R8_I9_OTHINTRACRA	IVW	4	-0.00332785	0.131456	0.979803
finngen_R8_CD2_BENIGN_KIDNEY	IVW	4	0.00578401	0.24118	0.980867
finngen_R8_K11_DISORD_TEETH	IVW	4	0.00232165	0.0977702	0.981055
finngen_R8_RHEUMA_SEROPOS_OTH	IVW	4	-0.00183483	0.0814627	0.98203
finngen_R8_H7_KERATITISOTH	IVW	4	-0.00169405	0.0797276	0.983048
finngen_R8_N14_POLYPFEMGEN	IVW	4	-0.00088331	0.0424795	0.98341
finngen_R8_Q17_CONGEN_MALFO_GENITAL_ORGANS	IVW	4	0.00153734	0.0754995	0.983754
finngen_R8_M13_DEFORMDORSO	IVW	4	-0.000962024	0.0479879	0.984006
finngen_R8_G6_HYDROCEPH	IVW	4	0.00316684	0.189623	0.986675
finngen_R8_KRA_PSY_DEMENTIA_EXMORE	IVW	4	0.00111182	0.0681748	0.986988
finngen_R8_SPONDYLOARTHRITIS	IVW	4	0.000906066	0.0576151	0.987453
finngen_R8_J10_PLEUROTH	IVW	4	0.000972693	0.0649282	0.988047
finngen_R8_CD2_MULTIPLE_MYELOMA_PLASMA_CELL_EXALLC	IVW	4	0.00304094	0.203452	0.988075
finngen_R8_N14_GLOMERULAR	IVW	4	-0.000520396	0.0486669	0.991468
finngen_R8_F5_MIXPER	IVW	4	-0.000491793	0.0571776	0.993137
finngen_R8_L12_PSORI_NAS	IVW	4	0.000664071	0.0782119	0.993226
finngen_R8_H7_HETEROPHORIA	IVW	4	0.000603571	0.0729601	0.993399
finngen_R8_APPENDICITIS_BROAD	IVW	3	-0.00022457	0.0338877	0.994713
finngen_R8_GEST_DIABETES	IVW	4	0.000196219	0.0373738	0.995811
finngen_R8_M13_HALLUXVALGUS	IVW	4	-0.000337186	0.0764549	0.996481
finngen_R8_Q17_CONGEN_DEFORMITI_FEET	IVW	4	-0.00121275	0.287346	0.996633
finngen_R8_N14_ACUTENEPHRITIC	IVW	4	-0.000896045	0.23252	0.996925
finngen_R8_C3_MENINGIOMA_EXALLC	IVW	4	-0.000833101	0.252687	0.997369
finngen_R8_CD2_BENIGN_MELANOCYTIC_FACE	IVW	4	-0.000677155	0.216405	0.997503
finngen_R8_ULCEROTH	IVW	4	0.000386594	0.188187	0.998361
finngen_R8_E4_CONGEIOD	IVW	4	-0.000125083	0.1748	0.999429

## Sheet: CCN4
Bonferroni correction pval < 3.20E-06 (0.05/1421/11)
CCN4
Diseases	method	nsnp	b	se	pval
finngen_R8_M13_MONOARTHRITIS	IVW	3	-1.08296	0.353382	0.00217991
finngen_R8_N14_ENDOMET_INFERT	IVW	3	-0.682161	0.227932	0.00276409
finngen_R8_PAIN	IVW	3	-0.125244	0.0420584	0.00290273
finngen_R8_J10_PLEURA	IVW	3	-0.297333	0.106707	0.00532892
finngen_R8_H7_CONJUNCTIVITIS	IVW	3	-0.245689	0.0896941	0.00615915
finngen_R8_N14_UTER_POLYP	IVW	3	-0.667841	0.24383	0.00616329
finngen_R8_M13_OSTEOCHONDROPATHY	IVW	3	-0.758784	0.280075	0.00674432
finngen_R8_J10_RESPOTHER	IVW	3	-0.431427	0.162207	0.00782032
finngen_R8_H7_ALLERGICCONJUNCTIVITIS	IVW	3	-0.244034	0.0919442	0.00795085
finngen_R8_G6_SLEEPAPNO_INCLAVO	IVW	3	-0.179608	0.0683736	0.00861748
finngen_R8_N14_FIOTHNAS	IVW	3	-0.328961	0.126953	0.009564
finngen_R8_CD2_BENIGN_OTHER_NOS	IVW	3	-1.12217	0.433673	0.00966458
finngen_R8_AB1_ZOSTER	IVW	3	-0.48518	0.188159	0.00992129
finngen_R8_H7_CONJUNCTIVITISACUNONATOPIC	IVW	2	-0.384183	0.154722	0.0130265
finngen_R8_E4_NONTOXIC_THYROID	IVW	3	-0.327542	0.13361	0.0142272
finngen_R8_CD2_LYMPHOID_LEUKAEMIA_EXALLC	IVW	3	0.799121	0.334915	0.0170309
finngen_R8_O15_ABORT_MEDICAL	IVW	3	-0.199035	0.0837737	0.017508
finngen_R8_M13_SCIATICA	IVW	3	-0.229966	0.0987504	0.0198717
finngen_R8_N14_FEMALEINFERT	IVW	3	-0.276265	0.119115	0.0203786
finngen_R8_ILD	IVW	3	-0.462158	0.19932	0.0204126
finngen_R8_ILD_ENDPOINTS	IVW	3	-0.462158	0.19932	0.0204126
finngen_R8_J10_CHRONTONSADEN	IVW	3	-0.171243	0.0741942	0.0209968
finngen_R8_RX_INFERTILITY	IVW	3	-0.379885	0.165268	0.0215278
finngen_R8_H7_PTOSIS	IVW	3	-0.627487	0.274253	0.0221384
finngen_R8_H8_PERIPHVERTIGO	IVW	2	-0.70353	0.307949	0.022338
finngen_R8_O15_LABOUR_OTHER	IVW	3	-0.534022	0.234131	0.0225563
finngen_R8_H7_HERPESKERATITIS	IVW	3	-0.854909	0.379085	0.0241215
finngen_R8_H7_CHALAZION	IVW	3	0.492537	0.220015	0.0251783
finngen_R8_E4_GOITREMULTINOD	IVW	3	-0.370344	0.166109	0.0257795
finngen_R8_G6_SLEEPAPNO	IVW	3	-0.15602	0.0702254	0.0263031
finngen_R8_N14_POLYPFEMGEN	IVW	3	-0.252659	0.116108	0.0295502
finngen_R8_J10_PNEUMOTHORAX	IVW	3	-0.624526	0.287857	0.0300392
finngen_R8_E4_HYPERALDO	IVW	2	-1.25955	0.587102	0.0319232
finngen_R8_E4_THYROID	IVW	2	-0.171219	0.0804911	0.0334057
finngen_R8_N14_MENORRHAGIA	IVW	3	-0.221306	0.1044	0.0340235
finngen_R8_O15_EXCESS_VOMIT_PREG	IVW	3	-0.558226	0.265096	0.0352256
finngen_R8_KRA_PSY_CHILDOTH_EXMORE	IVW	3	0.76247	0.362516	0.0354418
finngen_R8_I9_AF_REIMB	IVW	2	-0.331242	0.159077	0.0373174
finngen_R8_H8_BPV	IVW	3	-0.297333	0.14401	0.0389544
finngen_R8_I9_HYPTENSRD	IVW	3	0.824573	0.40186	0.0401801
finngen_R8_N14_DIALYSIS	IVW	3	-0.796817	0.389605	0.0408359
finngen_R8_NONALLERG_ASTHMA_EXMORE	IVW	3	-0.310087	0.153278	0.0430695
finngen_R8_CD2_BENIGN_RECTUM	IVW	3	-0.381306	0.188828	0.0434531
finngen_R8_RHEUMA_SERONEG	IVW	3	-0.41569	0.206598	0.044212
finngen_R8_J10_VIRALPNEUMO	IVW	3	-0.453258	0.225313	0.0442533
finngen_R8_G6_EPIPAROX	IVW	3	-0.0988278	0.0496921	0.0467232
finngen_R8_H7_EYELIDDIS	IVW	3	-0.221666	0.11169	0.0471834
finngen_R8_K11_APPENDECTOMY	IVW	3	-0.162414	0.0818956	0.0473466
finngen_R8_I9_DVTANDPULM	IVW	3	0.199966	0.101922	0.0497684
finngen_R8_O15_PREG_ABORT	IVW	3	-0.119335	0.0609131	0.0501012
finngen_R8_N14_OTHNONINFOVA	IVW	3	-0.898954	0.46304	0.0522075
finngen_R8_H7_SCLERACORNEA	IVW	3	-0.181309	0.0946213	0.055346
finngen_R8_SLEEP	IVW	3	-0.126836	0.0662006	0.0553736
finngen_R8_L12_OTHACUSKINSUN	IVW	3	-0.775232	0.404788	0.0554724
finngen_R8_COPD_INSUFFICIENCY	IVW	3	-0.427998	0.225343	0.0575226
finngen_R8_C3_URINARY_TRACT_EXALLC	IVW	3	-0.356636	0.187898	0.057692
finngen_R8_E4_DM2OPTH	IVW	3	-0.387555	0.204467	0.0580345
finngen_R8_N14_OLIGOMEN	IVW	3	-0.747614	0.394917	0.0583457
finngen_R8_E4_GLUCOPANCREAS	IVW	3	-0.477517	0.25362	0.0597266
finngen_R8_L12_URTICARIA	IVW	3	0.242139	0.12866	0.0598346
finngen_R8_J10_LOWCHRON	IVW	2	0.116072	0.0618602	0.0606063
finngen_R8_H7_HETEROPHORIA	IVW	3	-0.511209	0.272555	0.0607081
finngen_R8_N14_ENDOMETRIOSIS	IVW	3	-0.20948	0.111736	0.0608225
finngen_R8_K11_IBS	IVW	3	-0.25444	0.135796	0.0609736
finngen_R8_H7_BLEPHAROCHALASIS	IVW	3	-0.265015	0.143142	0.0641097
finngen_R8_M13_ARTHINOTH	IVW	3	-0.729179	0.393937	0.0641689
finngen_R8_G6_POSTOPNEURO	IVW	3	-0.515736	0.27886	0.0643933
finngen_R8_E4_DMNAS	IVW	3	-0.338192	0.183007	0.0646067
finngen_R8_L12_DECUBITANSULCERANDPRESSURE	IVW	2	0.696254	0.378733	0.0660067
finngen_R8_F5_DISSOCIATIVE	IVW	3	0.697044	0.380431	0.0669142
finngen_R8_N14_ENDOMETRIOSIS_PELVICPERITONEUM	IVW	3	-0.312173	0.174877	0.0742456
finngen_R8_J10_PNEUMONIA	IVW	3	-0.104609	0.0587386	0.0749249
finngen_R8_N14_PHIMOSIS	IVW	3	0.283168	0.159289	0.0754534
finngen_R8_CD2_BENIGN_COLORECANI	IVW	3	-0.234651	0.132242	0.0759953
finngen_R8_G6_ATYFAC	IVW	3	-0.61098	0.345868	0.0773104
finngen_R8_GOUT_IDIO	IVW	3	-0.496442	0.281409	0.0777101
finngen_R8_N14_NEPHRITICNAS	IVW	3	-0.922642	0.526042	0.0794422
finngen_R8_K11_EMBED_TEETH_INCLAVO	IVW	3	0.461813	0.263542	0.0797167
finngen_R8_H8_CHOLEASTOMA	IVW	3	-0.585938	0.335166	0.0804293
finngen_R8_ALCOPANCCHRON	IVW	3	0.522804	0.299996	0.0813854
finngen_R8_N14_HYDROCELE	IVW	3	0.316178	0.181844	0.0820814
finngen_R8_H7_RETINANAS	IVW	3	0.774911	0.445757	0.0821376
finngen_R8_I9_VTE	IVW	3	0.164858	0.0954109	0.0840101
finngen_R8_JOINTPAIN	IVW	3	-0.163988	0.0949578	0.0841752
finngen_R8_O15_GESTAT_HYPERT	IVW	3	-0.282898	0.16527	0.0869471
finngen_R8_F5_PERSMOOD	IVW	3	0.268757	0.157034	0.0869975
finngen_R8_I9_OTHANEUR	IVW	3	-0.566485	0.33245	0.0883868
finngen_R8_K11_MISS_TEETH_ACCID_EXTR_PAROD	IVW	3	-0.38592	0.227081	0.0892286
finngen_R8_M13_SPINSTENOSIS	IVW	3	-0.186806	0.110084	0.0897075
finngen_R8_I9_PROGVASC	IVW	3	-1.29581	0.764592	0.0901181
finngen_R8_I9_SECONDRIGHT	IVW	3	-0.659075	0.38956	0.0906756
finngen_R8_D3_ANAEMIA_B12_DEF	IVW	3	0.371705	0.220846	0.0923566
finngen_R8_ST19_FRACT_FOOT_ANKLE	IVW	3	-0.251442	0.150183	0.0940848
finngen_R8_L12_URTICA_NAS	IVW	3	0.269419	0.161331	0.0949243
finngen_R8_I9_VASCINT	IVW	3	-0.689974	0.413667	0.0953268
finngen_R8_H7_EYEADNEXOTH	IVW	3	-0.634956	0.382158	0.0966128
finngen_R8_ALLERG_RHINITIS	IVW	3	0.214867	0.130001	0.0983704
finngen_R8_I9_HYPOTE	IVW	3	-0.323313	0.19687	0.100535
finngen_R8_KELA_DIAB_INSUL_EXMORE	IVW	3	-0.102508	0.0626655	0.101883
finngen_R8_M13_POLYARTHRITIS	IVW	2	0.733388	0.449363	0.102666
finngen_R8_E4_HYPERPIT	IVW	3	-0.538255	0.33098	0.103897
finngen_R8_L12_ACNE	IVW	3	-0.511949	0.317753	0.107146
finngen_R8_DM_RET_VEIN_OCCLU	IVW	3	-1.14987	0.714339	0.107465
finngen_R8_J10_COPD	IVW	2	0.1822	0.11332	0.10787
finngen_R8_H7_CORNEALDEFORM	IVW	3	-0.82394	0.517151	0.111109
finngen_R8_DM_RETINA_PROLIF	IVW	3	-0.245536	0.154615	0.112276
finngen_R8_ASTHMA_OBESITY	IVW	3	-0.206483	0.130545	0.113717
finngen_R8_AB1_VIRAL_MENINGITIS	IVW	3	-0.628429	0.399454	0.115668
finngen_R8_C3_BLADDER_EXALLC	IVW	3	-0.471481	0.300428	0.116563
finngen_R8_H8_SUP_ACUTE	IVW	3	-0.208853	0.133364	0.117339
finngen_R8_G6_FACOTH	IVW	3	-0.729391	0.465839	0.117405
finngen_R8_H8_MED_SUPP	IVW	3	-0.172732	0.110348	0.117502
finngen_R8_E4_HYTHYNAS	Wald ratio	1	-0.145275	0.0931972	0.119046
finngen_R8_O15_LABOUR_INTRAPART_HAEMORRH	IVW	3	0.520266	0.333925	0.119226
finngen_R8_K11_DIVERTIC	IVW	3	-0.171246	0.110153	0.120035
finngen_R8_Q17_CONGEN_MALFO_OVARIES_FALLOP_TUBES_BROAD_LIGAM	IVW	3	-0.500914	0.323555	0.121584
finngen_R8_M13_CHRONDROPATHIES	IVW	3	-0.284934	0.184763	0.123036
finngen_R8_O15_HYPTENSPREG	IVW	3	-0.168448	0.109287	0.123236
finngen_R8_D3_IMMUNEMECHANISM	IVW	3	-0.291809	0.189424	0.123437
finngen_R8_K11_INTESTOTH	IVW	3	-0.0824682	0.0535662	0.123668
finngen_R8_C3_BREAST_EXALLC	IVW	3	0.169402	0.110524	0.125347
finngen_R8_H8_MIDDLEMASTOID	IVW	3	-0.131021	0.0855622	0.125697
finngen_R8_CD2_BENIGN_SIGMOID_COLON	IVW	3	-0.284753	0.18632	0.126437
finngen_R8_N14_ENDOMETRIOSIS_OVARY	IVW	3	-0.260859	0.1712	0.127582
finngen_R8_K11_EMBIMPACT_TEETH_INCLAVO	IVW	3	0.227193	0.149443	0.128444
finngen_R8_C3_SCLC_EXALLC	IVW	3	-0.768842	0.506122	0.128741
finngen_R8_CD2_BENIGN_RECTUM_ANAL	IVW	3	-0.262833	0.174042	0.131
finngen_R8_J10_PHARYNGITIS	IVW	3	-0.285667	0.189365	0.131415
finngen_R8_N14_ENDOMETRIOSIS_ASRM_STAGE1_2	IVW	3	-0.256997	0.170492	0.131712
finngen_R8_RX_RHEUMA_BIOLOGICAL	IVW	3	-0.310591	0.206191	0.131984
finngen_R8_K11_OPEN_BITE_INCLAVO	IVW	3	-0.553374	0.36741	0.132029
finngen_R8_K11_VASCINT	IVW	3	-0.461619	0.307005	0.132679
finngen_R8_H7_CATARACTOTHER	IVW	3	-0.159016	0.105959	0.133423
finngen_R8_I9_PHLETHROMBDVTLOW	IVW	3	0.255334	0.170295	0.133779
finngen_R8_L12_INFECT_SKIN	IVW	2	-0.163641	0.109311	0.134389
finngen_R8_CD2_BENIGN_MELANOCYTIC_NOS	IVW	3	-0.439451	0.294221	0.135278
finngen_R8_F5_ANOREX	IVW	3	-0.439516	0.294538	0.135641
finngen_R8_M13_ROTATORCUFF	IVW	3	-0.13127	0.0881595	0.136485
finngen_R8_K11_OTHDISSTOMDUOD	IVW	3	0.458517	0.308089	0.136682
finngen_R8_L12_HYPETROPHICSCAR	IVW	3	-0.835629	0.562591	0.137459
finngen_R8_Q17_OTHER_CONGEN_MALFO_DIGES_SYSTEM1	IVW	3	0.565033	0.381626	0.138715
finngen_R8_CD2_MULTIPLE_MYELOMA_PLASMA_CELL_EXALLC	IVW	3	0.542016	0.366832	0.139526
finngen_R8_PRIM_COXARTHROSIS	IVW	3	-0.222287	0.151617	0.142619
finngen_R8_E4_HYPERLIPMIX	IVW	3	0.894021	0.609872	0.142671
finngen_R8_H7_GLAUCNAS	IVW	3	0.469409	0.321775	0.144617
finngen_R8_CD2_BENIGN_PITUITARY_CRANIPHAR	IVW	3	-0.73241	0.503457	0.145735
finngen_R8_M13_POLYARTHROPATHIES	IVW	3	-0.112316	0.0772484	0.145956
finngen_R8_M13_SOFTTISSUENAS	IVW	3	-0.484026	0.333807	0.147054
finngen_R8_N14_FEMGENPAIN	IVW	3	-0.233032	0.160773	0.147214
finngen_R8_AB1_RESP_TUBERCU_NONCONF	IVW	3	0.503849	0.347656	0.14726
finngen_R8_C3_THYROID_GLAND_EXALLC	IVW	3	-0.448741	0.309648	0.147283
finngen_R8_KRA_PSY_DEVWIDE_EXMORE	IVW	3	0.76007	0.524736	0.147483
finngen_R8_M13_REACTARTH	IVW	3	-0.345171	0.239913	0.150227
finngen_R8_K11_APPENDACUT	IVW	3	-0.112295	0.0780953	0.150456
finngen_R8_G6_PLANTAR	IVW	3	-0.429246	0.299272	0.151486
finngen_R8_CD2_BENIGN_PAROTID	IVW	3	0.398949	0.278868	0.152545
finngen_R8_N14_FEMALEGENNONINF	IVW	3	-0.0806497	0.0563915	0.152667
finngen_R8_APPENDICITIS_BROAD	IVW	3	-0.108137	0.0756719	0.152998
finngen_R8_H7_LACRIMALSYSTEM	IVW	3	-0.1645	0.11518	0.153234
finngen_R8_C3_BASAL_CELL_CARCINOMA_INCLAVO_EXALLC	IVW	3	-0.144337	0.101727	0.155937
finngen_R8_K11_MAJOR_ANOMALI_JAW_SIZE_INCLAVO	IVW	3	-0.671536	0.473768	0.156355
finngen_R8_POLLENALLERG	IVW	3	0.237055	0.167413	0.156779
finngen_R8_D3_ANAEMIANAS	IVW	3	0.163821	0.116099	0.15823
finngen_R8_D3_WHITEBLOODCELLNAS	IVW	3	0.595404	0.423287	0.15954
finngen_R8_N14_PROSTHYPERPLA	IVW	3	-0.129594	0.0921993	0.159848
finngen_R8_E4_DMNASNASCOMP	IVW	3	-0.557934	0.397139	0.160057
finngen_R8_L12_SKINSUBCUTISNAS	IVW	3	-0.406875	0.289766	0.160275
finngen_R8_M13_LOWBACKPAINORANDSCIATICA	IVW	3	-0.115177	0.0822069	0.161195
finngen_R8_KRA_PSY_ANXIETY_EXMORE	IVW	3	0.10187	0.0727218	0.161267
finngen_R8_CD2_BENIGN_SALIVARY	IVW	3	0.38214	0.272959	0.161515
finngen_R8_ULCERNAS	IVW	3	0.334611	0.239632	0.162608
finngen_R8_K11_VOLVU	IVW	3	0.675987	0.486044	0.164288
finngen_R8_D3_THROMBOCYTOPENIANAS	IVW	3	0.412542	0.296721	0.164427
finngen_R8_K11_DISLIVOTH	IVW	3	-0.291958	0.210112	0.164669
finngen_R8_L12_OTHACUSKINSUNNAS	IVW	3	-0.974248	0.701149	0.16468
finngen_R8_H8_NONSUPPNAS	IVW	3	-0.199732	0.144102	0.165732
finngen_R8_H7_KERATITISOTH	IVW	3	-0.41134	0.300178	0.170587
finngen_R8_E4_HYPERCHOL	IVW	3	0.117301	0.0857288	0.171224
finngen_R8_D3_SARCOIDOSIS	IVW	3	-0.366165	0.268185	0.172145
finngen_R8_IPF	IVW	3	-0.387803	0.284481	0.172821
finngen_R8_J10_PNEUMOBACT	IVW	3	-0.189328	0.138957	0.173041
finngen_R8_GE_STRICT	IVW	3	-0.675189	0.495762	0.173222
finngen_R8_N14_GENITOUROTH	IVW	3	-0.292525	0.215002	0.17365
finngen_R8_I9_AORTANEUR	IVW	2	-0.232972	0.171497	0.174318
finngen_R8_AB1_VIRAL_OTHER_INTEST_INFECTIONS	IVW	3	0.202004	0.148771	0.174522
finngen_R8_J10_PNEUMONONBACT	IVW	3	0.600555	0.445263	0.177412
finngen_R8_G6_FEMLAPOP	IVW	3	-0.477845	0.354493	0.177669
finngen_R8_I9_ARTOTH	IVW	3	-0.332157	0.247013	0.178725
finngen_R8_Q17_ASD	IVW	3	-0.51987	0.386671	0.178794
finngen_R8_M13_PLANTARFASC	IVW	3	0.418192	0.31306	0.181608
finngen_R8_F5_DEMINOTH	IVW	3	-0.502206	0.376033	0.181701
finngen_R8_J10_CHRONSINUSITIS	IVW	3	0.136671	0.102372	0.181862
finngen_R8_N14_CHRONTUBULOINTNEPHRITIS	IVW	3	-0.503942	0.377819	0.182263
finngen_R8_M13_RECUDISLOCATIO	IVW	3	0.358774	0.269002	0.182295
finngen_R8_H7_GLAUCCLOSEPRIM	IVW	3	0.578476	0.434113	0.18268
finngen_R8_G6_BELLPA	IVW	3	0.291979	0.221001	0.186445
finngen_R8_C3_MELANOMA_SKIN_EXALLC	IVW	3	-0.307875	0.233526	0.187379
finngen_R8_AB1_VIRAL_SKIN_MUCOUS_MEMBRANE	IVW	3	-0.144467	0.109895	0.188649
finngen_R8_O15_ICP_WIDE	IVW	3	-0.339615	0.258474	0.188872
finngen_R8_C3_DLBCL_EXALLC	IVW	3	-0.56746	0.432548	0.189553
finngen_R8_HLP_C3_DLBCL	IVW	3	-0.5673	0.432545	0.189676
finngen_R8_O15_ICP_WIDE_EXMORE	IVW	3	-0.338198	0.259553	0.192575
finngen_R8_CAMPYLOENTERITIS	IVW	3	0.636988	0.488868	0.19258
finngen_R8_FALLS	IVW	3	0.354221	0.272524	0.193676
finngen_R8_F5_OCD	IVW	3	0.383983	0.296307	0.19501
finngen_R8_H7_CORNEALOTH	IVW	3	-0.334856	0.258433	0.195074
finngen_R8_AB1_ANOGENITAL_HERPES_SIMPLEX	IVW	3	-0.397192	0.306597	0.195152
finngen_R8_K11_DISORD_TEETH	IVW	3	-0.220122	0.170687	0.197181
finngen_R8_MACULAR_PUCKER	IVW	3	-0.286418	0.222334	0.197666
finngen_R8_J10_INFLUPNEU	IVW	3	-0.0732745	0.0569438	0.198169
finngen_R8_O15_POSTPART_HEAMORRH_LB	IVW	3	0.190629	0.148157	0.198209
finngen_R8_K11_FUNCDYSP	IVW	3	0.240028	0.186561	0.198237
finngen_R8_DENTAL_TMD	IVW	3	0.18564	0.144304	0.198287
finngen_R8_E4_DM2NASCOMP	IVW	3	-0.0867741	0.067501	0.198609
finngen_R8_N14_MESNRUIRREG	IVW	3	-0.100662	0.0784392	0.199381
finngen_R8_ALLERGIC_CONTACT_DERMA_DRUGS_CONTACT_W_SKIN	IVW	3	0.687448	0.536526	0.20009
finngen_R8_N14_IGA_NEPHROPATHY	IVW	3	-0.662771	0.51898	0.20158
finngen_R8_H7_RETINASEPAR	IVW	3	-0.503115	0.394249	0.201908
finngen_R8_VIRALPNEUMONAS	IVW	3	-0.452257	0.355097	0.2028
finngen_R8_H7_REFRAACCOMMODIS	IVW	3	-0.191923	0.15142	0.204982
finngen_R8_ASTHMA_NAS	IVW	3	-0.117594	0.0928121	0.205152
finngen_R8_DRUGADVERS_NEUTROPENIA	IVW	3	0.360605	0.284933	0.205664
finngen_R8_M13_DORSALGIANAS	IVW	3	-0.140127	0.110858	0.206222
finngen_R8_C3_ENDOCRINE_EXALLC	IVW	3	-0.374374	0.29622	0.206287
finngen_R8_K11_DEPOSITS	IVW	3	0.367136	0.291848	0.208402
finngen_R8_N14_OTHPENIS	IVW	3	0.319772	0.254926	0.209707
finngen_R8_H8_EXT_OTH	IVW	3	-0.426616	0.340308	0.209981
finngen_R8_L12_BULLOUS	IVW	3	-0.416837	0.332921	0.210548
finngen_R8_C3_BREAST_HERNEG_EXALLC	IVW	3	0.219801	0.175598	0.21067
finngen_R8_PRIM_KNEEARTHROSIS	IVW	3	-0.134609	0.107587	0.210874
finngen_R8_TBC_RESP	IVW	3	0.375429	0.300292	0.211221
finngen_R8_C3_BREAST_HER2NEG_EXALLC	IVW	3	0.143814	0.115263	0.212141
finngen_R8_Q17_CONGEN_MALFO_DEFORMAT_MUSCULOS_SYSTEM	IVW	3	-0.313875	0.251875	0.212707
finngen_R8_ST19_FRACT_RIBS_STERNUM_THORACIC_SPINE	IVW	3	-0.171647	0.137896	0.21322
finngen_R8_C3_OESOPHAGUS_EXALLC	IVW	3	-0.670428	0.538894	0.21347
finngen_R8_N14_OTHNONINFVULV	IVW	3	-0.536571	0.433541	0.215847
finngen_R8_O15_POSTPART_HEAMORRH_ALLW	IVW	3	0.178741	0.145179	0.218258
finngen_R8_D3_IMMUDEFANTIBODY	IVW	3	0.584481	0.474742	0.218265
finngen_R8_F5_ALLANXIOUS	IVW	3	0.108247	0.0879426	0.218368
finngen_R8_M13_SOFTTISSUEOTH	IVW	3	-0.0829316	0.067611	0.219974
finngen_R8_H7_ECTROPION	IVW	3	-0.490205	0.400627	0.221106
finngen_R8_RHEU_ARTHRITIS_OTH	IVW	3	-0.152241	0.124981	0.223184
finngen_R8_M13_ARTHROSIS_KNEE	IVW	3	-0.0850028	0.0698513	0.223638
finngen_R8_Q17_CONGEN_MALFO_GENITAL_ORGANS	IVW	3	-0.292948	0.240813	0.223795
finngen_R8_AB1_OTHER_SEPSIS	IVW	3	0.145183	0.119359	0.223849
finngen_R8_C3_SKIN_EXALLC	IVW	3	-0.120389	0.099276	0.225256
finngen_R8_DM_RETINOPATHY_EXMORE	IVW	3	-0.250262	0.206464	0.22546
finngen_R8_N14_RENFAILNAS	IVW	3	0.359557	0.296764	0.225669
finngen_R8_CD2_BENIGN_MOUTH_NOS	IVW	3	-0.504641	0.416628	0.225799
finngen_R8_M13_CALCIFICTEND	IVW	3	-0.381812	0.315613	0.226376
finngen_R8_AB1_OTHER_INFECTIONS	IVW	3	0.41956	0.347562	0.227374
finngen_R8_ARTHRO_SPEC	IVW	3	-0.621416	0.515536	0.228057
finngen_R8_N14_URINOTH	IVW	3	0.0765284	0.0635247	0.228318
finngen_R8_K11_JAWS	IVW	3	0.353427	0.293415	0.228385
finngen_R8_L12_OTHERCONTACT	IVW	3	0.307921	0.255682	0.228469
finngen_R8_M13_SJOGREN	IVW	3	0.307416	0.255544	0.228982
finngen_R8_J10_UPPERINFEC	IVW	3	0.0658177	0.0547414	0.229233
finngen_R8_C3_PANCREAS_EXALLC	IVW	3	0.410861	0.342368	0.230118
finngen_R8_M13_DORSALGIA	IVW	3	-0.0950228	0.0791912	0.230172
finngen_R8_F5_DELUSIO	IVW	3	0.341435	0.28479	0.230566
finngen_R8_CD2_BENIGN_LARYNX	IVW	3	-0.513688	0.42867	0.230789
finngen_R8_I9_ARTEMBTHRLOW	IVW	3	0.587901	0.490739	0.23092
finngen_R8_C3_BASAL_CELL_CARCINOMA_EXALLC	IVW	3	-0.123457	0.103075	0.231021
finngen_R8_AB1_OTHER_BACTERIAL	IVW	3	0.0786341	0.0657617	0.231797
finngen_R8_I9_ICH	IVW	3	0.261759	0.219215	0.232449
finngen_R8_F5_PARAPER	IVW	2	0.98224	0.82329	0.232843
finngen_R8_N14_FIANOV	IVW	3	-0.319733	0.26818	0.23317
finngen_R8_H8_EXT_INFNAS	IVW	3	-0.396142	0.333809	0.235333
finngen_R8_N14_POSTMENBLEED	IVW	3	-0.223289	0.188168	0.235366
finngen_R8_N14_FEMALEGENINF	IVW	3	0.107502	0.0908273	0.236578
finngen_R8_AB1_INTESTINAL_INFECTIONS	IVW	3	0.0787875	0.066616	0.236923
finngen_R8_KRA_PSY_CODUCTEMOT_EXMORE	IVW	3	0.66124	0.559903	0.237606
finngen_R8_H8_HL_MIX_NAS	IVW	3	-0.253756	0.214923	0.237729
finngen_R8_K11_UC_STRICT2	IVW	3	-0.214297	0.181598	0.237976
finngen_R8_L12_ULCERLOWLIMB	IVW	3	0.367773	0.312069	0.238598
finngen_R8_C3_BRAIN_EXALLC	IVW	2	-0.689668	0.585428	0.238774
finngen_R8_AB1_HERPES_SIMPLEX	IVW	3	-0.261624	0.223274	0.241292
finngen_R8_M13_POSTOPMUSCULOSKE	IVW	3	0.366172	0.313224	0.242387
finngen_R8_DRUGADVERS_CATAR	IVW	3	-0.601615	0.515787	0.243452
finngen_R8_O15_PLAC_PRAEVIA	IVW	3	0.429325	0.368414	0.243885
finngen_R8_M13_MENISCUSDERANGEMENTS	IVW	3	-0.122314	0.105467	0.246157
finngen_R8_M13_MYALGIA	IVW	3	0.182313	0.157441	0.246874
finngen_R8_J10_BRONCHIOLITIS	IVW	3	-0.343557	0.297121	0.247564
finngen_R8_M13_ANKYLOSPON_STRICT	IVW	3	-0.425816	0.368318	0.247636
finngen_R8_AB1_TUBERCULOSIS	IVW	3	0.348639	0.301633	0.247747
finngen_R8_H7_VITROTH	IVW	3	-0.140088	0.121594	0.24928
finngen_R8_ALCOHOL_RELATED	IVW	3	-0.0984908	0.0856232	0.250028
finngen_R8_H7_PTERYGIUM	IVW	3	-0.920229	0.800313	0.250211
finngen_R8_J10_ASBESTPNEUMOC	IVW	3	-0.601489	0.525383	0.252268
finngen_R8_ABDOM_HERNIA	IVW	3	-0.120946	0.105928	0.253546
finngen_R8_K11_ORAL_LICHEN_WIDE_HYPOT_THYRO	IVW	3	0.414878	0.364339	0.254822
finngen_R8_H7_CONJUVASC	IVW	3	-0.75302	0.661794	0.255185
finngen_R8_K11_CHOLANGI	IVW	3	-0.377221	0.332156	0.256093
finngen_R8_H7_PARASTRA6	IVW	3	-0.564891	0.497774	0.256444
finngen_R8_H8_MASTCHRON	IVW	3	-0.697	0.614705	0.256846
finngen_R8_NIV	IVW	3	-0.216666	0.19117	0.257058
finngen_R8_O15_POSTPART_HAEMORRH_PLACENTA	IVW	3	0.24449	0.216176	0.258065
finngen_R8_H7_VITROPACIT	IVW	3	0.465264	0.411546	0.258255
finngen_R8_K11_GINGIVA	IVW	3	-0.631148	0.558477	0.258425
finngen_R8_N14_ACUTENEPHRITIC	IVW	3	0.594414	0.52724	0.259571
finngen_R8_H7_ASTIGMATISM	IVW	3	-0.388681	0.345403	0.260462
finngen_R8_L12_OTHPIGMENTATION	IVW	3	0.438054	0.389314	0.260506
finngen_R8_M13_LOOSEJOINT	IVW	3	-0.553408	0.492804	0.261447
finngen_R8_C3_NSCLC_ADENO_EXALLC	IVW	3	0.404387	0.360782	0.262347
finngen_R8_H8_VERTIGO	IVW	3	-0.169997	0.152206	0.264041
finngen_R8_CD2_PRIMARY_LYMPHOID_HEMATOPOIETIC_EXALLC	IVW	3	0.244688	0.219228	0.264365
finngen_R8_N14_ABNORMALBLEED	IVW	3	-0.15237	0.136686	0.26496
finngen_R8_J10_TONSILLITIS	IVW	3	0.128356	0.115184	0.265126
finngen_R8_E4_HYTHY_AI_STRICT	Wald ratio	1	-0.111849	0.100642	0.266414
finngen_R8_CD2_BENIGN_BONE_LONG_LOWER	IVW	2	-0.551865	0.496678	0.26652
finngen_R8_H7_EYEOTH	IVW	3	-0.233583	0.210546	0.267251
finngen_R8_K11_LIVER	IVW	3	-0.158091	0.142704	0.267936
finngen_R8_HERING_UNILATERAL	IVW	3	0.529406	0.479509	0.269568
finngen_R8_I9_RHEUFEV	IVW	3	0.50213	0.454882	0.26965
finngen_R8_H7_MODVISIMPBINOC	IVW	3	-0.535203	0.487818	0.272582
finngen_R8_M13_ARTHROSIS_OTH	IVW	3	-0.103498	0.0943465	0.272642
finngen_R8_AB1_ERYSIPELAS	IVW	3	0.102532	0.093764	0.27417
finngen_R8_K11_ADHE	IVW	3	-0.292612	0.267642	0.274262
finngen_R8_K11_CHRONPANC	IVW	3	0.24135	0.22083	0.27443
finngen_R8_M13_SHOULDERBURSITIS	IVW	3	-0.557385	0.510666	0.275059
finngen_R8_AB1_VIRAL_WARTS	IVW	3	0.260478	0.238879	0.275529
finngen_R8_AB1_CHLAMYDIA_OTHER	IVW	3	0.313962	0.288526	0.276525
finngen_R8_F5_OTHPER	IVW	3	0.255058	0.234523	0.27679
finngen_R8_Q17_OTHER_CONGEN_MALFO_CIRCULATO_SYSTEM	IVW	3	0.836308	0.770057	0.277464
finngen_R8_N14_MENOPAUSOT	IVW	3	-0.24579	0.226363	0.277559
finngen_R8_AUD_SWEDISH	IVW	3	-0.097488	0.08987	0.278025
finngen_R8_M13_DORSOPATHYOTH	IVW	3	-0.0936248	0.0863486	0.278247
finngen_R8_E4_DMNASNOCOMP	IVW	3	-0.266233	0.24585	0.278849
finngen_R8_K11_TOOTH_DEV	IVW	3	-0.351688	0.325616	0.280111
finngen_R8_K11_DIAHER	IVW	3	-0.17654	0.163805	0.281147
finngen_R8_K11_PARODON_OPER	IVW	3	0.101039	0.0939742	0.282294
finngen_R8_CD2_BENIGN_BONE_CARTILAGE	IVW	3	0.2862	0.266203	0.282321
finngen_R8_F5_BEHEMOCHILD	IVW	3	0.198117	0.184584	0.28313
finngen_R8_E4_HYPOPIT	IVW	3	-0.319335	0.298169	0.284175
finngen_R8_H7_HYPERMETRO	IVW	3	-0.347255	0.325344	0.285815
finngen_R8_CD2_BENIGN_EAR_NASAL_SINUS	IVW	3	0.423651	0.397068	0.285996
finngen_R8_REAC_ARTHRO_NOS	IVW	3	-0.315013	0.295322	0.286119
finngen_R8_F5_PSYTRANS	IVW	3	-0.248422	0.233763	0.287915
finngen_R8_N14_CYSTKID	IVW	3	0.414277	0.390297	0.28849
finngen_R8_N14_CYSTITIS	IVW	3	0.106181	0.100124	0.288923
finngen_R8_DM_RETINA_NOS	IVW	3	-0.261494	0.247188	0.290111
finngen_R8_J10_NASALPOLYP	IVW	3	0.362197	0.342446	0.290202
finngen_R8_E4_DM1OPTH	IVW	2	-0.475313	0.450168	0.291034
finngen_R8_H7_CORNEALNAS	IVW	3	-0.468624	0.444091	0.291314
finngen_R8_M13_ARTHROSIS_INCLAVO	IVW	3	-0.0543045	0.0515639	0.292272
finngen_R8_M13_PYOGARTH	IVW	3	-0.319086	0.303637	0.293314
finngen_R8_G6_AD_WIDE	IVW	3	0.133934	0.12749	0.293469
finngen_R8_D3_IMMUNEMECHANISMNAS	IVW	3	-0.496008	0.472684	0.29402
finngen_R8_CHRONSMALL	IVW	3	-0.559385	0.533456	0.294359
finngen_R8_I9_MYOCARD	IVW	3	-0.348134	0.332017	0.294389
finngen_R8_BLEEDING	IVW	3	-0.0766907	0.0732106	0.294853
finngen_R8_I9_HEARTFAIL_AND_ANTIHYPERT	IVW	3	0.112673	0.107623	0.295135
finngen_R8_M13_OSTEOCHONDRO	IVW	3	-0.113209	0.108179	0.29533
finngen_R8_GE_MODE	IVW	3	0.302362	0.289169	0.295735
finngen_R8_H7_RETINALDETACH	IVW	3	-0.12941	0.123936	0.29641
finngen_R8_CD2_BENIGN_MELANOCYTIC_FACE	IVW	3	-0.339042	0.325165	0.297097
finngen_R8_CD2_BENIGN_LIPO_NOS	IVW	3	0.261831	0.251361	0.297572
finngen_R8_H7_RETINOPATHYDIAB_PROLIF	IVW	2	-0.459375	0.441312	0.297908
finngen_R8_J10_SIMPLBRONCH	IVW	3	0.365721	0.351654	0.298339
finngen_R8_M13_OLECRANONBURSITIS	IVW	3	-0.323711	0.311536	0.298767
finngen_R8_M13_ADHCAPSULITIS	IVW	3	-0.180698	0.174028	0.299118
finngen_R8_H8_SUP_OTINAS	IVW	3	-0.49529	0.47707	0.299182
finngen_R8_CD2_BENIGN_MELANOCYTIC_SCALPNECK	IVW	2	-0.618259	0.595556	0.299214
finngen_R8_I9_CONDUCTIO	IVW	3	-0.140278	0.135132	0.299233
finngen_R8_M13_NEURALGIA	IVW	3	-0.513253	0.494426	0.299234
finngen_R8_CD2_BENIGN_CONJUNCTIVA	IVW	3	-0.464073	0.44728	0.299482
finngen_R8_I9_THAORTANEUR	IVW	2	-0.180595	0.174439	0.300533
finngen_R8_I9_RHEUVALV	IVW	3	0.488255	0.472892	0.301844
finngen_R8_K11_OESSTODUO	IVW	3	0.0609223	0.0590926	0.302558
finngen_R8_N14_CERVICAL_LSIL	IVW	3	0.237789	0.231122	0.303552
finngen_R8_J10_SINUSITIS	IVW	3	0.108968	0.106078	0.304308
finngen_R8_K11_KELAIBD	IVW	3	-0.215768	0.210421	0.30517
finngen_R8_M13_SYSTSLCE	IVW	3	0.526581	0.515491	0.307012
finngen_R8_O15_MAT_CARE_MALPRESENT	IVW	3	0.175988	0.172342	0.307181
finngen_R8_H7_LIDLACRIMALORBIT	IVW	3	-0.0771078	0.0755529	0.307453
finngen_R8_E4_DM2PERIPH	IVW	3	0.278929	0.274505	0.309573
finngen_R8_N14_ENDOMETRIOSIS_ASRM_STAGE3_4	IVW	3	-0.151583	0.14923	0.309738
finngen_R8_H7_CATARACTSENILE	IVW	3	-0.110264	0.108626	0.310066
finngen_R8_K11_TEETH_HARD	IVW	3	0.235186	0.231747	0.310182
finngen_R8_CD2_BENIGN_MELANOCYTIC	IVW	3	-0.143402	0.141336	0.310287
finngen_R8_N14_INFCERVIX	IVW	3	0.394183	0.389447	0.311461
finngen_R8_N14_PROHERNOV	IVW	3	0.388841	0.385084	0.312612
finngen_R8_N14_AMENORRHEAPRIM	IVW	3	0.285005	0.282806	0.313563
finngen_R8_Q17_OTHER_CONGEN_MALFO_SKIN	IVW	3	0.382252	0.379325	0.313591
finngen_R8_C3_MELANOMA_EXALLC	IVW	3	-0.208917	0.207593	0.314234
finngen_R8_K11_LIP_ORAL_MUCOSA	IVW	3	-0.187705	0.186747	0.314834
finngen_R8_K11_PERIODON_CHRON	IVW	3	0.287144	0.285719	0.314903
finngen_R8_I9_HYPERTROCARDMYOP	IVW	3	0.397604	0.396475	0.315935
finngen_R8_O15_PREG_OTHER_MAT_DISORD	IVW	3	-0.0805044	0.0803133	0.31616
finngen_R8_RHEUMA_ARHTROPAT_REACTIVE	IVW	3	-0.274903	0.274593	0.316765
finngen_R8_O15_POSTPART_HEAMORRH	IVW	3	0.146562	0.146415	0.316826
finngen_R8_Q17_CONGEN_DEFORMITI_FEET	IVW	3	-0.496944	0.496949	0.317316
finngen_R8_H8_VESTIFUNCNAS	IVW	3	-0.463778	0.464873	0.318452
finngen_R8_J10_EXTERLUNG	IVW	3	0.299781	0.300752	0.318875
finngen_R8_D3_ITP	IVW	3	0.464359	0.466239	0.319266
finngen_R8_J10_TONSILLECTOMY	IVW	3	-0.155186	0.156143	0.320284
finngen_R8_C3_COLON_ADENO_EXALLC	IVW	3	0.272233	0.274054	0.320537
finngen_R8_N14_ACUTERENFAIL	IVW	3	0.170061	0.171209	0.320566
finngen_R8_E4_DM2KETO	IVW	3	1.02739	1.03594	0.321321
finngen_R8_K11_MALABSORB	IVW	3	0.364266	0.36826	0.322587
finngen_R8_E4_LIPOPROT	IVW	3	0.107345	0.108597	0.32292
finngen_R8_M13_HAMMERTOE	IVW	3	-0.1849	0.187131	0.323115
finngen_R8_F5_DEMENTIA_INCLAVO	IVW	3	0.109318	0.110666	0.32324
finngen_R8_KRA_PSY_PERSON_EXMORE	IVW	3	0.146861	0.148698	0.323326
finngen_R8_D3_AGRANULOCYTOSIS	IVW	3	0.220632	0.223399	0.323342
finngen_R8_M13_ARTHROSIS	IVW	3	-0.0567355	0.0575342	0.324075
finngen_R8_M13_INTERVERTEB	IVW	3	-0.085993	0.0872488	0.324327
finngen_R8_M13_ENTESOPATHYOTH	IVW	3	-0.1895	0.192603	0.325169
finngen_R8_T2D	IVW	3	-0.0610959	0.0622506	0.326371
finngen_R8_T1D_WIDE	IVW	3	-0.142714	0.145869	0.327891
finngen_R8_K11_HYPO_ONLY_INCLAVO	IVW	3	-0.423172	0.434409	0.329991
finngen_R8_M13_POLYMYALGIA	IVW	3	-0.215014	0.22088	0.330334
finngen_R8_D3_ACQHAEMOLYTICANAEMIA	IVW	3	0.504761	0.519039	0.330806
finngen_R8_N14_PYELONEPHR	IVW	3	-0.0843054	0.0868112	0.331481
finngen_R8_L12_ERYTHEMANODOSUM	IVW	3	-0.434652	0.447578	0.331488
finngen_R8_AB1_VIRAAL_CONJUNCT	IVW	3	-0.699649	0.721062	0.331895
finngen_R8_M13_SPONDYLINFLAMNAS	IVW	3	-0.522419	0.538856	0.332297
finngen_R8_K11_PARODON_OPER_DENTAL_OPER	IVW	3	0.118303	0.122073	0.332487
finngen_R8_C3_COLON_EXALLC	IVW	3	0.206518	0.213258	0.332849
finngen_R8_APPENDACUT_COMPLIC	IVW	3	-0.150665	0.155834	0.333631
finngen_R8_CHRONOTH	IVW	3	-0.371292	0.384077	0.333687
finngen_R8_O15_PREECLAMPS	IVW	3	-0.164061	0.169846	0.334074
finngen_R8_H7_RETINALDETACHOTH	IVW	3	-0.450261	0.466181	0.334119
finngen_R8_DM_PERIPH_ANGIOPATHY	IVW	3	0.253974	0.263101	0.334389
finngen_R8_G6_HEMIPLE	IVW	3	-0.412634	0.428245	0.335273
finngen_R8_F5_MIXPER	IVW	3	0.241191	0.250437	0.335507
finngen_R8_C3_LUNG_NONSMALL_EXALLC	IVW	3	0.255908	0.266468	0.336868
finngen_R8_J10_LOWERINF	IVW	3	-0.0867974	0.0905803	0.337943
finngen_R8_K11_CROSSBITE	IVW	3	0.307793	0.321527	0.338424
finngen_R8_O15_DELIV_SPONT	IVW	3	0.0560841	0.0587048	0.339396
finngen_R8_E4_HYPOOSMNAT	IVW	3	0.174688	0.183679	0.341578
finngen_R8_AB1_EBV	IVW	3	0.251676	0.264674	0.341659
finngen_R8_I9_ARTEMBTHR	IVW	3	0.350937	0.369619	0.342389
finngen_R8_N14_OBSTRUREFLUROPATH	IVW	3	-0.198578	0.209363	0.342881
finngen_R8_F5_INSOMNIA	IVW	3	-0.193989	0.204557	0.342956
finngen_R8_O15_RETAINED_PLAC_MEMB_NO_HEAMORRH	IVW	3	-0.200106	0.212129	0.345517
finngen_R8_CD2_BENIGN_MELANOCYTIC_LOWERLIMB	IVW	2	-0.443602	0.470825	0.3461
finngen_R8_K11_UMBHER	IVW	3	-0.133191	0.14139	0.34619
finngen_R8_KRA_PSY_BEHAV_EXMORE	IVW	3	-0.545245	0.581462	0.348392
finngen_R8_O15_GESTAT_OEDEM_PREINUR	IVW	3	-0.233122	0.248748	0.348665
finngen_R8_H7_GLAUCOMAMEDICATION	IVW	3	0.465746	0.497568	0.34925
finngen_R8_CD2_BENIGN_MELANOCYTIC_TRUNK	IVW	3	-0.214555	0.229495	0.349839
finngen_R8_E4_GRAVES_STRICT	IVW	3	-0.22297	0.238543	0.349933
finngen_R8_G6_TRINEU	IVW	3	-0.298973	0.320164	0.3504
finngen_R8_H8_EUSTSALP	IVW	3	-0.283589	0.30386	0.350672
finngen_R8_I9_K_CARDIAC	IVW	3	-0.111798	0.119793	0.350683
finngen_R8_M13_FIBROMYALGIA	IVW	3	-0.255664	0.274592	0.351819
finngen_R8_H7_CORNULCER	IVW	3	-0.163268	0.175598	0.352484
finngen_R8_J10_PNEUMONISOLLIQ	IVW	3	0.331449	0.35688	0.353023
finngen_R8_J10_ASTHMA_EXMORE	IVW	3	-0.0899429	0.0968846	0.353226
finngen_R8_N14_VAGINAL_DYSPLASIA_ALL	IVW	3	-0.469203	0.506655	0.354404
finngen_R8_I9_ANGIO	IVW	3	0.108569	0.117434	0.355222
finngen_R8_E4_ENDODIS	IVW	3	0.298233	0.323151	0.356065
finngen_R8_K11_PERIODON_CHRON_COMPL	IVW	3	0.347531	0.376943	0.356542
finngen_R8_H8_PERFORATION	IVW	3	-0.222039	0.240871	0.356625
finngen_R8_H7_RETINOPATHYDIAB_BKG_SEVERE	IVW	3	-0.402942	0.437146	0.356656
finngen_R8_M13_ARTHROPATHIES	IVW	3	-0.0495843	0.0538462	0.357128
finngen_R8_AB1_MUMPS	IVW	3	0.478481	0.520617	0.358061
finngen_R8_O15_ICP_EXMORE	IVW	3	-0.268094	0.291734	0.358113
finngen_R8_F5_PHOBANX	IVW	3	0.183301	0.19968	0.358634
finngen_R8_H7_OCUMUSCLE	IVW	3	-0.144096	0.156997	0.358711
finngen_R8_H7_IRIDOCHRONIC	IVW	3	0.318407	0.347223	0.359136
finngen_R8_H8_HL_CON_NAS	IVW	3	-0.288103	0.314576	0.359748
finngen_R8_M13_CERVICOBRACHSDR	IVW	3	-0.171076	0.186849	0.359884
finngen_R8_M13_GOUT	IVW	3	-0.132753	0.145411	0.361267
finngen_R8_J10_BRONCHITIS	IVW	3	-0.0954701	0.104689	0.361801
finngen_R8_D3_COAGDEFNAS	IVW	3	-0.336676	0.369353	0.362017
finngen_R8_ST19_FRACT_SHOUL_UPPER_ARM	IVW	3	-0.109957	0.120672	0.362188
finngen_R8_O15_PRE_OR_ECLAMPSIA	IVW	3	-0.138964	0.152532	0.362269
finngen_R8_CD2_BENIGN_MENINGES	IVW	3	-0.261582	0.28715	0.362317
finngen_R8_L12_LYMPHADENITIS	IVW	3	-0.272347	0.300438	0.364671
finngen_R8_K11_CARIES_DENTIN	IVW	3	0.135957	0.149981	0.364673
finngen_R8_O15_FALSE_LAB	IVW	3	-0.105039	0.116128	0.365725
finngen_R8_M13_METATARSALGIA	IVW	3	-0.225947	0.250733	0.367511
finngen_R8_M13_DORSOPATHY	IVW	3	-0.0641489	0.0711896	0.367536
finngen_R8_GOUT_STRICT	IVW	3	-0.179025	0.199025	0.368382
finngen_R8_N14_NEPHROTICSYND	IVW	3	0.391739	0.435889	0.368805
finngen_R8_CD2_BENIGN_MOUTH_PHARYNX	IVW	3	-0.289252	0.322167	0.369274
finngen_R8_E4_THYTOXGOITMULT	IVW	3	-0.288526	0.321761	0.369875
finngen_R8_O15_MULTIP_GEST	IVW	3	-0.290165	0.323951	0.370411
finngen_R8_I9_VARICVESOTH	IVW	3	-0.264798	0.296552	0.371898
finngen_R8_O15_DELIV_MULTIP	IVW	3	-0.358765	0.40204	0.3722
finngen_R8_CD2_BENIGN_TRANSVERSE_COLON	IVW	3	-0.236865	0.265542	0.37239
finngen_R8_CD2_BENIGN_LIP	IVW	3	0.469648	0.526558	0.372436
finngen_R8_T2D_WIDE	IVW	3	-0.0654566	0.0739349	0.37598
finngen_R8_C3_KIDNEY_NOTRENALPELVIS_EXALLC	IVW	3	-0.251126	0.283812	0.376246
finngen_R8_INV_VENT	IVW	3	0.25379	0.28749	0.377356
finngen_R8_K11_MAXIL_MOLAR_FAILED_ERUPT_OBSTRUCTION_TOOTH	IVW	3	0.319537	0.362265	0.377749
finngen_R8_J10_PERITONSABSC	IVW	3	0.149869	0.170697	0.379954
finngen_R8_M13_SCOLIOSIS	IVW	3	0.223597	0.254986	0.38054
finngen_R8_O15_MATERN_CARE_PELVIC_ABNORM	IVW	3	-0.122329	0.139646	0.381033
finngen_R8_R18_RETEN_URINE	IVW	3	-0.108522	0.124094	0.381839
finngen_R8_M13_PREPATELLARBURSITIS	IVW	3	-0.322835	0.369581	0.382381
finngen_R8_H7_VISUDISTURBSUB	IVW	3	-0.133521	0.152944	0.382659
finngen_R8_L12_PSORI_PUSTUPALM	IVW	3	0.337767	0.387001	0.382783
finngen_R8_O15_ANTEPART_HAEM_NAS	IVW	3	0.228523	0.262468	0.383934
finngen_R8_L12_DISORDSKINAPPENDIX	IVW	3	-0.131769	0.151759	0.385242
finngen_R8_M13_SPINENTHES	IVW	3	-0.32595	0.376836	0.387059
finngen_R8_O15_EXIST_HYPERT_COMPLIC	IVW	3	-0.330412	0.382216	0.387333
finngen_R8_CD2_BENIGN_ENDOCRINE_OTH	IVW	3	-0.253113	0.293252	0.388069
finngen_R8_H8_OTHEREAR	IVW	3	-0.0715038	0.0828845	0.388307
finngen_R8_H7_VERTISTRAB	IVW	3	0.374241	0.43583	0.390514
finngen_R8_I9_PULMEMB	IVW	3	0.11608	0.135491	0.391591
finngen_R8_F5_MIXEDDEV	IVW	3	0.466604	0.544784	0.391724
finngen_R8_F5_DEMENTIA	IVW	3	0.0984686	0.115741	0.3949
finngen_R8_L12_ACTINKERA	IVW	3	-0.110296	0.129892	0.395804
finngen_R8_I9_OTHINTRACRA	IVW	3	-0.399372	0.470605	0.396085
finngen_R8_M13_ENTESOPATHYNAS	IVW	3	-0.30151	0.356019	0.397054
finngen_R8_CD2_BENIGN_BREAST	IVW	3	0.325799	0.385284	0.397771
finngen_R8_AB1_DERMATOPHYTOSIS	IVW	3	-0.185621	0.219519	0.397789
finngen_R8_C3_OTHER_SKIN_EXALLC	IVW	3	-0.0906731	0.107457	0.398774
finngen_R8_M13_SPONDYLOLISTHESIS	IVW	3	0.144795	0.171702	0.399066
finngen_R8_E4_DM2REN	IVW	3	0.210319	0.249482	0.399216
finngen_R8_APPENDACUT_NOCOMPLIC	IVW	3	-0.110125	0.130652	0.399294
finngen_R8_H8_OTIMEDNAS	IVW	3	-0.182154	0.216585	0.400333
finngen_R8_E4_HYPERPRO	IVW	3	-0.333403	0.396992	0.401007
finngen_R8_ST19_FRACT_LUMBAR_SPINE_PELVIS	IVW	3	-0.139309	0.165989	0.401318
finngen_R8_L12_LUPUS	IVW	3	0.715492	0.853337	0.40177
finngen_R8_M13_BIOMECHLESIO	IVW	3	-0.467472	0.557768	0.401967
finngen_R8_F5_STRESSOTH	IVW	3	0.129806	0.155376	0.403475
finngen_R8_O15_MATERN_CARE_CERVICAL_INCOMPETENCE	IVW	3	0.336327	0.404974	0.406262
finngen_R8_K11_VENTHER	IVW	3	-0.123182	0.148664	0.407334
finngen_R8_M13_JUVOSTEOCHONRHIP	IVW	3	0.342176	0.41384	0.408332
finngen_R8_RX_CROHN_1STLINE	IVW	3	-0.0434964	0.0527692	0.409782
finngen_R8_GEST_DIABETES	IVW	3	-0.0978191	0.118872	0.410567
finngen_R8_CD2_BENIGN_CONNECTIVE_SOFT	IVW	3	0.233631	0.284284	0.411179
finngen_R8_K11_FIBROCHIRLIV	IVW	3	-0.247513	0.301219	0.411246
finngen_R8_M13_ALGONEURO	IVW	3	0.560119	0.682901	0.412099
finngen_R8_F5_ALZHDEMENT	IVW	3	0.158335	0.193219	0.412524
finngen_R8_H8_HL_NAS	IVW	3	-0.228019	0.278276	0.412559
finngen_R8_E4_ENDOMETPOSTOP	IVW	3	-0.182358	0.222922	0.413338
finngen_R8_H7_EYELIDINOTH	IVW	3	-0.349598	0.427447	0.413429
finngen_R8_SPONDYLOARTHRITIS	IVW	3	-0.175623	0.215138	0.414313
finngen_R8_AB1_SYPHILIS	IVW	3	0.41697	0.511522	0.414983
finngen_R8_K11_ACUTPANC	IVW	3	0.13302	0.163793	0.416721
finngen_R8_M13_ARTHTROSIS_COX_PRIM_HIPSURG	IVW	3	-0.139094	0.171454	0.417216
finngen_R8_F5_ANXIETY	IVW	3	0.0848543	0.104658	0.417493
finngen_R8_G6_ALZHEIMER	IVW	3	0.119428	0.147478	0.418052
finngen_R8_Q17_CONGEN_MALFO_URINARY_SYSTEM	IVW	3	-0.259273	0.320479	0.418506
finngen_R8_H7_RETINOPATHYDIAB_BKG	IVW	2	-0.605473	0.749059	0.418911
finngen_R8_M13_OTHERJOINT	IVW	3	-0.0433144	0.0535964	0.418999
finngen_R8_H7_RETINOPATHYDIAB_NAS	IVW	3	0.237307	0.294205	0.419894
finngen_R8_ALCOPANCACU	IVW	3	-0.519078	0.644306	0.420451
finngen_R8_H7_CHORIORETINFLAM	IVW	3	0.38091	0.473125	0.420765
finngen_R8_T1D_STRICT1	IVW	3	-0.181515	0.225815	0.421501
finngen_R8_L12_INFECT_SKIN_OTHER	IVW	3	-0.31621	0.393484	0.421619
finngen_R8_H7_GLAUCOMA_NTG	IVW	3	-0.232829	0.289991	0.422043
finngen_R8_AB1_PROTOZOAL	IVW	3	0.574659	0.715899	0.422143
finngen_R8_N14_CALCULOWER	IVW	3	-0.282793	0.3523	0.422145
finngen_R8_H7_RETINALDETACHBREAK	IVW	3	-0.25307	0.315937	0.423124
finngen_R8_L12_ERYTHEMATOUSOTH	IVW	3	-0.347903	0.4348	0.423627
finngen_R8_J10_NECROTIC	IVW	3	-0.268711	0.33607	0.42396
finngen_R8_L12_PSORI_VULG	IVW	3	0.155072	0.19408	0.424284
finngen_R8_M13_OTHERBONE	IVW	3	-0.157869	0.197595	0.424317
finngen_R8_M13_FLATFOOT	IVW	3	-0.309884	0.388336	0.424882
finngen_R8_H8_TINNITUS	IVW	3	0.122552	0.153644	0.425083
finngen_R8_K11_PULP_PERIAPICAL	IVW	2	-0.115224	0.144643	0.425677
finngen_R8_K11_ORAL_LICHEN_PLANUS_INCLAVO	IVW	3	0.351216	0.440955	0.425748
finngen_R8_ANTIDEPRESSANTS	IVW	3	0.0512474	0.064347	0.425786
finngen_R8_AB1_VARICELLA	IVW	3	-0.282572	0.357004	0.428647
finngen_R8_I9_OTHPER	IVW	3	-0.216455	0.273748	0.429114
finngen_R8_O15_LABOUR_MALPOS	IVW	3	-0.119482	0.152827	0.434326
finngen_R8_M13_CERVICALGIA	IVW	3	-0.124551	0.159409	0.434609
finngen_R8_ASTHMA_PNEUMONIA	IVW	3	-0.0923634	0.118774	0.436781
finngen_R8_E4_GOITREDIFF	IVW	3	-0.753022	0.969273	0.437222
finngen_R8_RX_ANTIHYP	IVW	3	0.0567422	0.0730723	0.437441
finngen_R8_K11_OTHDISOES	IVW	3	0.18299	0.235792	0.437709
finngen_R8_L12_ALLERGICCONTACT	IVW	3	0.239406	0.308672	0.437985
finngen_R8_L12_SCARCONDITIONS	IVW	3	-0.311165	0.403256	0.440333
finngen_R8_Q17_VACTREL	IVW	3	-0.13961	0.181004	0.440525
finngen_R8_K11_OTHGASTR	IVW	3	0.114891	0.149162	0.441157
finngen_R8_J10_ACUTELOWERNAS	IVW	3	-0.145297	0.188651	0.441186
finngen_R8_CD2_BENIGN_BRAIN_CNS	IVW	3	-0.345847	0.449983	0.442144
finngen_R8_K11_OTHINFLIV	IVW	3	0.260488	0.338957	0.442191
finngen_R8_C3_BREAST_HERPLUS_EXALLC	IVW	3	0.110565	0.143936	0.442397
finngen_R8_L12_CORNSANDCALLOS	IVW	3	-0.218804	0.284974	0.442605
finngen_R8_M13_TENDOSYNOVITISNAS	IVW	3	-0.162651	0.211997	0.442942
finngen_R8_D3_COAGDEF	IVW	3	-0.532114	0.694144	0.443334
finngen_R8_G6_SCIALE	IVW	3	-0.261	0.340697	0.44363
finngen_R8_O15_PREEC_OR_FETGRO	IVW	3	-0.104978	0.137336	0.444636
finngen_R8_J10_PLEURPLAGUE	IVW	3	-0.240304	0.314531	0.444863
finngen_R8_N14_CERVICAL_DYSPLASIA_ALL	IVW	3	0.112452	0.147341	0.445336
finngen_R8_O15_MATERN_CARE_OTHER	IVW	3	0.109151	0.143364	0.446447
finngen_R8_CHRONLARGE	IVW	3	-0.245785	0.322896	0.446544
finngen_R8_H8_VESTIBNEUR	IVW	3	0.215213	0.283052	0.447058
finngen_R8_M13_SOFTTISSUE	IVW	3	-0.0360176	0.047449	0.447805
finngen_R8_VOCALCORDDYS	IVW	3	0.302396	0.399751	0.449373
finngen_R8_ST19_FRACT_NECK	IVW	3	-0.332292	0.439357	0.449461
finngen_R8_E4_LACTONAS	IVW	3	-0.523494	0.692513	0.449689
finngen_R8_K11_DEEP_BITE_INCLAVO	IVW	3	-0.187652	0.248285	0.449774
finngen_R8_H7_DIVERGSTRAB	IVW	3	-0.200303	0.265288	0.450226
finngen_R8_D3_OTHERWHITECELL	IVW	3	0.274518	0.367323	0.454853
finngen_R8_AB1_SEQULEAE_OF_INFECTIONS_AND_PARASITES	IVW	3	0.192498	0.257721	0.455109
finngen_R8_K11_HERNIA	IVW	3	-0.0497125	0.0666532	0.455766
finngen_R8_M13_BURSOPATHY	IVW	3	-0.152519	0.204905	0.456672
finngen_R8_K11_PARALIL	IVW	3	-0.345888	0.466785	0.458693
finngen_R8_AB1_SALMONELLA_OTH	IVW	3	0.290983	0.393797	0.459959
finngen_R8_L12_FOLLICULARNAS	IVW	3	-0.308019	0.417742	0.460914
finngen_R8_K11_FEMHER	IVW	3	0.26309	0.356973	0.46112
finngen_R8_E4_FH	IVW	3	0.134739	0.182909	0.461337
finngen_R8_ABDOM_HERNIA_POSTOP	IVW	3	-0.127659	0.173331	0.461425
finngen_R8_H7_KERATITISINOTH	IVW	3	-0.302334	0.410829	0.461784
finngen_R8_TEMPOROMANDIB_INCLAVO	IVW	2	-0.131541	0.179094	0.462656
finngen_R8_M13_INFBURSA	IVW	3	-0.60321	0.821556	0.462809
finngen_R8_M13_LIMBPAIN	IVW	3	-0.0614213	0.0837202	0.463162
finngen_R8_K11_POSTOPDIS	IVW	3	-0.498243	0.67982	0.463617
finngen_R8_M13_JUVERHEU	IVW	3	-0.348802	0.47706	0.464688
finngen_R8_F5_ADHD	IVW	3	0.209722	0.287131	0.465143
finngen_R8_F5_EMOPER	IVW	3	-0.197428	0.271003	0.466302
finngen_R8_O15_MEMBR_PREMAT_RUPT	IVW	3	0.130184	0.178872	0.466731
finngen_R8_K11_OTHPERITON	IVW	3	-0.256705	0.352754	0.466786
finngen_R8_M13_GLUTEALTEND	IVW	3	0.400494	0.550458	0.46688
finngen_R8_ST19_FRACT_LOWER_LEG_INCLU_ANKLE	IVW	3	-0.0677032	0.0931003	0.467099
finngen_R8_J10_PLEUROTH	IVW	3	0.170671	0.235775	0.469144
finngen_R8_E4_METABOLIA	IVW	3	0.0703478	0.0972846	0.46961
finngen_R8_M13_SHOULDERNAS	IVW	3	0.184885	0.257184	0.472214
finngen_R8_O15_DELIV_FORCEP_VAC	IVW	3	0.113293	0.157747	0.472637
finngen_R8_RX_CODEINE_TRAMADOL	IVW	3	-0.0425305	0.0592791	0.473089
finngen_R8_JUVEN_ARTHR	IVW	3	-0.236035	0.329009	0.47312
finngen_R8_F5_SPEECH	IVW	3	0.229976	0.320938	0.473637
finngen_R8_F5_SCHIZOAFF	IVW	3	0.338698	0.473404	0.474329
finngen_R8_F5_PSYCHDEV	IVW	3	0.153597	0.214698	0.474356
finngen_R8_N14_FITUB	IVW	3	-0.238328	0.333389	0.474693
finngen_R8_E4_PCOS_CONCORTIUM	IVW	3	-0.0561613	0.0786221	0.47503
finngen_R8_Q17_CYSTIC_KIDNEY_DISEA	IVW	3	-0.42291	0.592061	0.475041
finngen_R8_M13_ARTHTROSIS_COX	IVW	3	-0.072903	0.102125	0.475312
finngen_R8_I9_CORATHER	IVW	3	0.0995543	0.139594	0.475741
finngen_R8_N14_URETHRAOTH	IVW	3	0.0612505	0.0859383	0.476015
finngen_R8_AB1_BACTINF_NOS	IVW	3	0.0818058	0.114875	0.476384
finngen_R8_N14_OTHNONINFVAG	IVW	3	0.189631	0.266629	0.47695
finngen_R8_FG_CARDMYO	IVW	3	0.140802	0.198011	0.477034
finngen_R8_J10_VOCALLARYNX	IVW	3	-0.0672946	0.0947219	0.477429
finngen_R8_H7_VISFIELDDEF	IVW	3	-0.257491	0.362728	0.477783
finngen_R8_K11_GULC	IVW	3	-0.128494	0.181729	0.479526
finngen_R8_O15_DELIV_CAESAR	IVW	3	-0.0888249	0.125945	0.480644
finngen_R8_F5_BULIMIA	IVW	3	0.460639	0.655897	0.48249
finngen_R8_ST19_TOXIC_EFFECT_ALCOHOL	IVW	3	-0.3537	0.505261	0.483906
finngen_R8_C3_RECTUM_ADENO	IVW	3	-0.239327	0.342018	0.484083
finngen_R8_M13_SACROCOGG	IVW	3	-0.299545	0.428123	0.484133
finngen_R8_E4_OBESITYNAS	IVW	3	0.0872728	0.12521	0.485797
finngen_R8_KRA_PSY_ANYMENTAL	IVW	3	0.0342308	0.049132	0.485985
finngen_R8_CD2_BENIGN_ANUS_ANAL_CANAL	IVW	3	0.33002	0.473723	0.48602
finngen_R8_VWXY20_SUICI_OTHER_INTENTI_SELF_H	IVW	3	-0.227889	0.327619	0.486685
finngen_R8_KRA_PSY_HYPERKIN_EXMORE	IVW	3	0.281415	0.404734	0.486862
finngen_R8_N14_MENSIRREG	IVW	3	0.0714281	0.102822	0.487256
finngen_R8_DM_MACULOPATHY_EXMORE	IVW	3	-0.223464	0.321957	0.487633
finngen_R8_G6_MS	IVW	3	0.255416	0.368048	0.487699
finngen_R8_M13_SPONDYLOSIS	IVW	2	0.0742541	0.107314	0.48898
finngen_R8_M13_SHOULDER	IVW	3	-0.0510923	0.0739178	0.489437
finngen_R8_E4_OVARDYS	IVW	3	0.201366	0.292184	0.490714
finngen_R8_O15_POSTPART_HAEMORRH_ANATOMY	IVW	3	-0.166876	0.242823	0.491936
finngen_R8_K11_CARIES_1_ONLYAVO	IVW	3	-0.029563	0.0430267	0.492029
finngen_R8_F5_PTSD	IVW	3	-0.301617	0.4416	0.494602
finngen_R8_G6_RADLES	IVW	3	-0.303921	0.445272	0.49489
finngen_R8_ASTHMA_EOSINOPHIL_SUGG	IVW	3	0.271935	0.398827	0.495343
finngen_R8_H8_OTALGIA	IVW	3	0.199156	0.292733	0.496294
finngen_R8_CD2_BENIGN_SKIN	IVW	3	-0.0799296	0.118102	0.498543
finngen_R8_I9_CEREBDOTH	IVW	3	-0.235089	0.348026	0.499363
finngen_R8_O15_TWIN_GEST	IVW	3	-0.279345	0.413599	0.499421
finngen_R8_O15_ABORT_SPONTAN	IVW	3	0.0697756	0.103313	0.499434
finngen_R8_CD2_BENIGN_CHOROID	IVW	3	0.242228	0.35908	0.499943
finngen_R8_MACULAR_HOLE	IVW	3	-0.245631	0.365445	0.501494
finngen_R8_E4_DM1PERIPH	IVW	3	0.330878	0.493065	0.502179
finngen_R8_M13_KNEEDERANGEMENTS	IVW	3	-0.0628483	0.0938631	0.503129
finngen_R8_TONGUEABNORMALITY	IVW	3	-0.217859	0.325948	0.503889
finngen_R8_K11_ENERCOLNONINF	IVW	3	-0.0666789	0.0997798	0.503967
finngen_R8_H7_STENOLACRI	IVW	3	-0.168781	0.25265	0.504105
finngen_R8_M13_DEFORMACQ	IVW	3	-0.350355	0.525413	0.504888
finngen_R8_M13_BONEDENSOTH	IVW	3	-0.454682	0.682268	0.505138
finngen_R8_H7_AMBLYANOPSIA	IVW	3	0.265033	0.398029	0.505499
finngen_R8_COPD_MODE	IVW	2	0.0846256	0.127225	0.505946
finngen_R8_AB1_CHOLERA	IVW	3	-0.23227	0.349214	0.505972
finngen_R8_CD2_BENIGN_EAR_RESP	IVW	3	-0.179088	0.270113	0.507323
finngen_R8_H8_EXTOTITIS	IVW	3	-0.107198	0.16236	0.509094
finngen_R8_E4_FH_IHD	IVW	3	0.296181	0.448847	0.509337
finngen_R8_J10_ASTHMA_MAIN_EXMORE	IVW	3	-0.080485	0.122263	0.510347
finngen_R8_O15_COMPLIC_LAB_DELIV	IVW	3	-0.0557326	0.0847405	0.510741
finngen_R8_M13_OSTEOMYELITIS	IVW	3	0.353923	0.538185	0.51078
finngen_R8_H8_HL_SEN_NAS	IVW	3	-0.0810284	0.123637	0.512226
finngen_R8_G6_MONONPOTHUS	IVW	3	-0.291592	0.447065	0.514249
finngen_R8_H7_HORDEOLUM	IVW	3	-0.232805	0.357278	0.514655
finngen_R8_H7_CONJUHAEMOR	IVW	3	-0.196143	0.30114	0.514831
finngen_R8_N14_POSTMENATRVAG	IVW	3	-0.279953	0.430362	0.515365
finngen_R8_CD2_BENIGN_CAECUM	IVW	3	-0.253242	0.389394	0.515467
finngen_R8_I9_HYPTENSEC	IVW	3	0.220278	0.339271	0.516165
finngen_R8_D3_BLOODOTHER	IVW	3	0.152881	0.235812	0.516779
finngen_R8_ST19_TOXIC_EFFECT_ETHAN	IVW	3	-0.322576	0.497648	0.516855
finngen_R8_ST19_FRACT_FOREA	IVW	3	-0.0611656	0.0944443	0.51722
finngen_R8_BACT_INTEST_INFECTION_NOS	IVW	3	-0.197455	0.305196	0.517646
finngen_R8_J10_CHRONRHINITIS	IVW	3	-0.081154	0.125819	0.518922
finngen_R8_E4_HYPERLIPNAS	IVW	3	0.12475	0.193586	0.519304
finngen_R8_D3_ANAEMIA_IRONDEF_BLOODLOSS	IVW	3	-0.207121	0.322372	0.520554
finngen_R8_N14_GLOMER_NEPHRITIS	IVW	3	0.203085	0.316205	0.520705
finngen_R8_F5_KELAMENT	IVW	3	-0.0898899	0.140003	0.520837
finngen_R8_ASTHMA_CHILD_EXMORE	IVW	3	0.115323	0.179722	0.521086
finngen_R8_O15_OTHER_MATERN_DIS_ELSEWHERE	IVW	3	0.0799605	0.124615	0.521095
finngen_R8_AMN2	IVW	3	-0.167243	0.260742	0.521255
finngen_R8_K11_ABSCANAL	IVW	3	0.162056	0.252675	0.521287
finngen_R8_M13_TOEDEFORMOTH	IVW	3	-0.261943	0.409104	0.521988
finngen_R8_HYPOTHY_REIMB	IVW	2	-0.266555	0.416483	0.522164
finngen_R8_Q17_CONGEN_MALFO_GREAT_ARTERIES	IVW	3	-0.418975	0.654715	0.522215
finngen_R8_G6_EPLEPSY	IVW	3	-0.0769391	0.120784	0.524126
finngen_R8_H7_RETINOCHISISCYST	IVW	3	-0.33729	0.530096	0.524593
finngen_R8_M13_RHEUMATISM	IVW	3	-0.119013	0.187527	0.52566
finngen_R8_G6_OTHNEU	IVW	3	-0.0521527	0.082321	0.526388
finngen_R8_KRA_PSY_CHILDEMOT_EXMORE	IVW	3	0.28684	0.45279	0.526411
finngen_R8_L12_ATROPHICSKIN	IVW	3	-0.135817	0.214645	0.526894
finngen_R8_ULCERENTER	IVW	3	0.264624	0.419858	0.528517
finngen_R8_J10_INFLUENZA	IVW	3	-0.0883744	0.140225	0.528541
finngen_R8_J10_COLD	IVW	3	-0.128414	0.204095	0.529225
finngen_R8_G6_SLEEPDISOTH	IVW	3	-0.143382	0.227955	0.529355
finngen_R8_CONGEN_HEART_ARTER	IVW	3	-0.12879	0.20599	0.531824
finngen_R8_DENTAL_TMD_FIBRO	IVW	3	-0.0862226	0.138142	0.532524
finngen_R8_O15_PLAC_PREMAT_SEPAR	IVW	3	-0.355639	0.570265	0.532865
finngen_R8_C3_MENINGES_EXALLC	IVW	3	-0.232967	0.373718	0.533036
finngen_R8_AB1_BACT_BIR_OTHER_INF_AGENTS	IVW	3	0.255859	0.411174	0.533768
finngen_R8_COPD_OPPORTUNIST_INFECTIONS	IVW	3	0.328308	0.527865	0.533973
finngen_R8_N14_FEMALE_GENITAL_LSIL	IVW	3	0.126706	0.203853	0.534235
finngen_R8_K11_BARRET	IVW	3	0.325504	0.523707	0.534246
finngen_R8_PDSTRICT_EXMORE	IVW	3	-0.13431	0.216238	0.534522
finngen_R8_I9_RBBB	IVW	3	-0.258255	0.415859	0.53459
finngen_R8_E4_THYTOXGOITDIF	IVW	3	-0.119589	0.193251	0.536028
finngen_R8_DM_NEOVASCULAR_GLAUCOMA	IVW	3	0.239432	0.38707	0.536196
finngen_R8_F5_OPIOIDS	IVW	3	0.236279	0.38337	0.537682
finngen_R8_D3_PURPURA_AND3_OTHER_HAEMORRHAGIC	IVW	3	0.196688	0.319171	0.537732
finngen_R8_M13_OSTEONECROSIS	IVW	3	-0.213112	0.346409	0.538421
finngen_R8_K11_ORALCYST	IVW	3	-0.227508	0.37082	0.539528
finngen_R8_J10_UPPERDIS	IVW	3	-0.0296237	0.0483906	0.540419
finngen_R8_K11_EROSION_INCLAVO	IVW	3	-0.110388	0.180904	0.541727
finngen_R8_E4_SHORT	IVW	3	0.357883	0.587272	0.54226
finngen_R8_ASTHMA_MIXED_EXMORE	IVW	3	-0.183282	0.304784	0.547606
finngen_R8_H8_EUSTNAS	IVW	3	-0.443302	0.738386	0.548262
finngen_R8_J10_BRONCHNAS	IVW	3	0.633268	1.05602	0.548722
finngen_R8_G6_ALCODEGEN	IVW	3	-0.446581	0.745431	0.549112
finngen_R8_H7_EPISCLERITIS	IVW	3	-0.258003	0.430846	0.549286
finngen_R8_I9_AVBLOCK	IVW	3	-0.107915	0.180846	0.550693
finngen_R8_E4_GOITRENOD	IVW	3	-0.168268	0.282084	0.55083
finngen_R8_M13_SHORTACHILLES	IVW	3	0.300127	0.503204	0.550887
finngen_R8_AB1_SEXUAL_TRANSMISSION_NOS	IVW	3	-0.101697	0.170842	0.551661
finngen_R8_I9_DISVEINLYMPH	IVW	3	0.0469952	0.0790393	0.552124
finngen_R8_I9_NONRHEVALV	IVW	3	0.0580783	0.0977217	0.552296
finngen_R8_KRA_PSY_ANYMENTAL_SUICID_PREG_NERV_EXMORE	IVW	3	0.137289	0.231126	0.552511
finngen_R8_H7_VISDISTNAS	IVW	3	0.196393	0.330762	0.552673
finngen_R8_H7_PERIPHRETINADEGEN	IVW	3	-0.268827	0.45309	0.552967
finngen_R8_M13_MYOSITIS	IVW	3	0.288826	0.487045	0.55317
finngen_R8_G6_MONOOTHUNS	IVW	3	-0.256668	0.433722	0.553998
finngen_R8_AB1_TUBERCU_OTH_ORG	IVW	3	0.498848	0.847976	0.556344
finngen_R8_N14_URETHRITISANDURSYNDR	IVW	3	-0.30514	0.518871	0.556475
finngen_R8_L12_LICHENSCLERATROPH	IVW	3	-0.158497	0.271401	0.559224
finngen_R8_D3_COAGOTHER	IVW	3	-0.171602	0.294083	0.559546
finngen_R8_H7_CHOROIDRETINA	IVW	3	-0.0825895	0.14212	0.561155
finngen_R8_M13_DUPUTRYEN	IVW	3	-0.147843	0.254609	0.561466
finngen_R8_J10_SEPTDEV	IVW	3	-0.0701006	0.120746	0.561536
finngen_R8_U22_COVID19_SUSPECTED	IVW	3	0.121362	0.209065	0.561577
finngen_R8_AD_LO_EXMORE	IVW	3	0.110794	0.191381	0.562643
finngen_R8_K11_PULPITIS_3	IVW	3	0.134865	0.233159	0.562976
finngen_R8_D3_ALLERGPURPURA	IVW	3	0.299884	0.51932	0.563632
finngen_R8_O15_PREG_GU_INFECT	IVW	3	-0.137446	0.238101	0.563763
finngen_R8_I9_SEQULAE	IVW	3	0.073364	0.127121	0.56386
finngen_R8_H7_IRIDOACUTE	IVW	3	-0.0952276	0.165229	0.564387
finngen_R8_K11_ORAL_LICHEN_PLANUS_WIDE	IVW	3	0.0991096	0.172396	0.565363
finngen_R8_ULCEROTH	IVW	3	-0.18174	0.316251	0.565516
finngen_R8_CD2_BENIGN_HEAMANGIOMA_LYMPHANGIOMA	IVW	3	-0.149547	0.260242	0.565531
finngen_R8_E4_DM2COMA	IVW	3	0.151146	0.263287	0.565919
finngen_R8_MUCOPROCT	IVW	3	-0.116167	0.20302	0.567189
finngen_R8_K11_ORAL_LEUCOPLAC_RELAT	IVW	3	0.186115	0.325359	0.567301
finngen_R8_M13_PSORIARTH	IVW	3	-0.131341	0.229777	0.567593
finngen_R8_K11_OTHANRECT	IVW	3	0.0754432	0.132141	0.568046
finngen_R8_L12_DERMATITISECZEMA	IVW	3	-0.0384482	0.0675314	0.569127
finngen_R8_SLE_FG	IVW	2	-0.767814	1.35096	0.5698
finngen_R8_I9_REVASC	IVW	3	0.0933961	0.16454	0.570294
finngen_R8_H7_ENTROPION	IVW	3	0.239391	0.423325	0.571732
finngen_R8_I9_POSTAMI	IVW	3	-0.163761	0.289876	0.572118
finngen_R8_N14_INFLUTH	IVW	3	-0.11125	0.197149	0.572554
finngen_R8_CD2_BENIGN_LIPO_SKIN_TRUNK	IVW	3	0.155728	0.276126	0.572771
finngen_R8_E4_DM1NEU	IVW	3	-0.221137	0.394371	0.574978
finngen_R8_E4_GOITRENAS	IVW	3	-0.162169	0.289373	0.575197
finngen_R8_O15_LABOUR_FETAL_STRESS	IVW	3	-0.0828469	0.147948	0.575497
finngen_R8_K11_BILIAOTH	IVW	3	-0.150941	0.270399	0.576697
finngen_R8_C3_CERVIX_UTERI_EXALLC	IVW	3	-0.125661	0.225152	0.576766
finngen_R8_FE	IVW	3	0.0879319	0.157674	0.577062
finngen_R8_M13_SPONDYLOPATHYNAS	IVW	3	-0.353419	0.635332	0.578024
finngen_R8_SMOKING_DEPEND	IVW	3	0.212937	0.383099	0.578329
finngen_R8_CD2_FOLLICULAR_LYMPHOMA_EXALLC	IVW	3	0.216886	0.390307	0.578428
finngen_R8_I9_VARICVE	IVW	3	0.0447534	0.0806434	0.578926
finngen_R8_K11_CHOLELITH	IVW	3	-0.0397494	0.0717603	0.579634
finngen_R8_N14_OTHBLADD	IVW	3	-0.145377	0.262472	0.579663
finngen_R8_ANOSMIA	IVW	3	-0.263843	0.477358	0.580459
finngen_R8_L12_LICHENPLANUS_INCLAVO	IVW	3	0.101582	0.184101	0.581103
finngen_R8_I9_CARDMYOOTH	IVW	3	-0.143122	0.25942	0.581154
finngen_R8_Q17_CONGEN_MALFO_EYE_EAR_FACE_NECK	IVW	3	-0.160377	0.29077	0.58125
finngen_R8_N14_VAGINITIS	IVW	3	0.110331	0.200301	0.581755
finngen_R8_M13_ENTESOPATHYLOW	IVW	3	-0.0850159	0.154917	0.583154
finngen_R8_I9_CAVS_OPERATED	IVW	3	-0.107081	0.195525	0.583926
finngen_R8_F5_MENTORG	IVW	3	-0.130767	0.238778	0.583931
finngen_R8_L12_DERM_NUMMULAR	IVW	3	0.152857	0.27922	0.584075
finngen_R8_O15_PUERP_COMPL_NAS	IVW	3	0.332815	0.611515	0.586272
finngen_R8_K11_OESULC	IVW	3	-0.235791	0.434934	0.587728
finngen_R8_J10_BRONCH	IVW	3	0.128756	0.23857	0.589406
finngen_R8_I9_CARDMYO	IVW	3	0.0905918	0.168507	0.590843
finngen_R8_N14_KIDUROTH	IVW	3	0.117432	0.218602	0.591134
finngen_R8_KRA_PSY_ALCOH_EXMORE	IVW	3	-0.105391	0.196596	0.591906
finngen_R8_CD2_BENIGN_THYROID	IVW	3	-0.231192	0.431319	0.59195
finngen_R8_AB1_VIRAL_SKIN_NOS	IVW	3	-0.212072	0.396779	0.593007
finngen_R8_C3_STOMACH_EXALLC	IVW	3	-0.224007	0.419155	0.593048
finngen_R8_I9_IHD	IVW	3	0.0736903	0.138062	0.593517
finngen_R8_NEURODEGOTH	IVW	3	0.0659172	0.123532	0.593615
finngen_R8_K11_CARIES_2	IVW	3	0.0478444	0.0900327	0.595134
finngen_R8_N14_RENALTUBULOOTH	IVW	3	-0.364754	0.686965	0.595443
finngen_R8_CD2_MYELOID_LEUKAEMIA_EXALLC	IVW	3	0.263688	0.499561	0.597611
finngen_R8_ASTHMA_ALLERG	IVW	3	0.100564	0.191148	0.598817
finngen_R8_H7_RETINOPATHYDIAB	IVW	3	-0.149338	0.284297	0.599382
finngen_R8_C_STROKE	IVW	3	-0.0487206	0.0930158	0.600425
finngen_R8_H7_IRIDONAS	IVW	3	-0.210514	0.402882	0.601307
finngen_R8_H8_EXTDISINOTH	IVW	3	0.267281	0.512493	0.601997
finngen_R8_AUTOIMMUNE_HYPERTHYROIDISM	IVW	3	-0.182814	0.351284	0.602774
finngen_R8_CD2_BENIGN_COLON_NOS	IVW	3	-0.105828	0.203467	0.602979
finngen_R8_H7_RETINALBREAK	IVW	3	-0.105749	0.203337	0.603017
finngen_R8_L12_URTICA_ALLERG	IVW	3	0.147282	0.283433	0.603317
finngen_R8_E4_PCOS	IVW	3	0.181904	0.350745	0.604026
finngen_R8_M13_SPONDYLOPATHY	IVW	2	-0.0417552	0.080578	0.604321
finngen_R8_I9_AORTVALV_EARLY	IVW	3	0.225642	0.436055	0.604833
finngen_R8_KRA_PSY_DEMENTIA_EXMORE	IVW	3	0.063593	0.123153	0.605592
finngen_R8_F5_EATOTH	IVW	3	0.169868	0.329031	0.605667
finngen_R8_G6_NERPLEX	IVW	3	-0.0328701	0.0637135	0.605921
finngen_R8_K11_PULPITIS_1_ONLYAVO	IVW	3	0.026501	0.0514166	0.606262
finngen_R8_K11_STOMATITIS	IVW	3	0.133945	0.260184	0.606687
finngen_R8_K11_GALLBLAOTH	IVW	3	0.191828	0.372901	0.606957
finngen_R8_AB1_SCABIES	IVW	3	0.198583	0.38622	0.607132
finngen_R8_M13_BONECONTINUITY	IVW	3	-0.133099	0.258923	0.607217
finngen_R8_N14_HYPERTROPHYBREAST	IVW	3	0.0922834	0.179718	0.607609
finngen_R8_N14_NEUROMUSCDYSBLADD	IVW	3	0.202226	0.394023	0.607788
finngen_R8_N14_OVARYCYST	IVW	3	-0.0498971	0.0972629	0.607943
finngen_R8_O15_LABOUR_LONG	IVW	3	-0.114447	0.223633	0.608818
finngen_R8_DM_NEUROPATHY	IVW	3	0.127738	0.250496	0.610093
finngen_R8_AB1_SEQULAE_TUBERCU	IVW	3	0.269894	0.531913	0.611872
finngen_R8_J10_PYOTHORAX	IVW	3	-0.262658	0.518564	0.612498
finngen_R8_H7_CONJUNCTIVITISCHRON	IVW	3	-0.389934	0.772567	0.613752
finngen_R8_I9_VARICVEOES	IVW	3	-0.203037	0.403452	0.61479
finngen_R8_L12_PILONIDALCYST	IVW	3	-0.134594	0.268672	0.616399
finngen_R8_H8_EXTDISNAS	IVW	3	0.208997	0.419394	0.618251
finngen_R8_D3_ANAEMIA_IRONDEF_NAS	IVW	3	0.0712342	0.143123	0.618685
finngen_R8_M13_CHONDROMALACIA	IVW	3	-0.2238	0.45094	0.619685
finngen_R8_F5_AGORAPHOBIA	IVW	3	0.211898	0.429972	0.622141
finngen_R8_H7_EYELIDINFLAMMATION	IVW	3	0.112046	0.227629	0.622557
finngen_R8_E4_DM1REN	IVW	3	-0.23175	0.472379	0.623708
finngen_R8_AB1_HEPATITIS_OTHER_VIRAL	IVW	3	-0.163202	0.333214	0.624288
finngen_R8_M13_PATELLADISLOCATIO	IVW	3	0.182364	0.372615	0.624546
finngen_R8_L12_ABSCESS_CUT	IVW	2	-0.0849871	0.173851	0.624948
finngen_R8_AB1_GASTROENTERITIS_NOS	IVW	3	0.0509389	0.104512	0.625977
finngen_R8_M13_ARTHROSIS_POLY	IVW	3	0.0828518	0.170173	0.626351
finngen_R8_M13_TROCHANTERICBURSITIS	IVW	3	0.108786	0.223664	0.626698
finngen_R8_I9_PAROXTAC	IVW	3	0.0670034	0.137904	0.62706
finngen_R8_F5_MANIA	IVW	3	0.206435	0.426857	0.628658
finngen_R8_K11_CHRONHEP	IVW	3	-0.281626	0.582602	0.628817
finngen_R8_K11_ERUPTION_INCLAVO	IVW	3	0.103668	0.214692	0.629189
finngen_R8_CHIRHEP_NAS	IVW	3	-0.185172	0.383904	0.629566
finngen_R8_N14_OTHDISMALEGEN	IVW	3	-0.322737	0.671644	0.630859
finngen_R8_RHINITIS_VASOMOTOR	IVW	3	-0.204766	0.427886	0.632256
finngen_R8_I9_ANGINA	IVW	3	0.0890069	0.186297	0.632814
finngen_R8_CD2_BENIGN_EYE	IVW	3	0.1212	0.255526	0.635275
finngen_R8_N14_LUMPNASBREAST	IVW	3	0.0893236	0.188717	0.635984
finngen_R8_K11_ORAL_LEUCOPLAC_RELAT_INCLAVO	IVW	3	0.125692	0.26586	0.636374
finngen_R8_H7_STRABOTH	IVW	3	-0.107766	0.228049	0.63653
finngen_R8_K11_REIMB_202	IVW	3	-0.0427959	0.090626	0.636766
finngen_R8_COPD_LATER	IVW	3	0.117377	0.249322	0.637794
finngen_R8_SFN	IVW	3	-0.253044	0.537974	0.638095
finngen_R8_FG_DOAAC	IVW	3	0.0609275	0.129773	0.638716
finngen_R8_FG_CEREBVASC	IVW	3	-0.0453603	0.0966714	0.638911
finngen_R8_K11_ACUTGASTR	IVW	3	-0.122809	0.262458	0.639845
finngen_R8_M13_DEQUERVAIN	IVW	3	0.154395	0.330462	0.640349
finngen_R8_E4_VIT_B_DEF	IVW	3	-0.245071	0.525304	0.640835
finngen_R8_KRA_PSY_EATING_EXMORE	IVW	3	0.222363	0.477714	0.641592
finngen_R8_GE	IVW	3	-0.180771	0.388619	0.641814
finngen_R8_Q17_SEPTA_DEFEC	IVW	3	-0.141376	0.304116	0.642022
finngen_R8_M13_MEDIALEPICOND	IVW	3	-0.184991	0.398002	0.642075
finngen_R8_I9_PERICAOTH	IVW	3	-0.248756	0.535701	0.642392
finngen_R8_I9_E_DRONE	IVW	3	0.213566	0.462915	0.644548
finngen_R8_AB1_OTHER_VIRAL	IVW	3	0.0601619	0.130409	0.64456
finngen_R8_RX_PARACETAMOL_NSAID	IVW	3	-0.0254372	0.0552016	0.644938
finngen_R8_H7_RETINALDISOTH	IVW	3	-0.0741458	0.161017	0.645168
finngen_R8_O15_LABOUR_OBSTR_OTHER	IVW	3	-0.125445	0.272949	0.645809
finngen_R8_SCND_OTH_KNEEARTHROSIS	IVW	3	-0.161548	0.353258	0.647449
finngen_R8_Q17_CONGEN_MALFO_CIRCULATO_SYSTEM	IVW	3	0.127662	0.279418	0.647753
finngen_R8_HERING_BILATERAL	IVW	3	0.113808	0.250453	0.649534
finngen_R8_Q17_CRANIOSYNOSTOSIS	IVW	3	-0.212604	0.468345	0.649866
finngen_R8_SCND_OTH_COXARTHROSIS	IVW	3	-0.202665	0.448068	0.651047
finngen_R8_T1D_EARLY	IVW	3	-0.109753	0.242969	0.651474
finngen_R8_CD2_HODGKIN_LYMPHOMA_EXALLC	IVW	3	-0.206627	0.458382	0.652153
finngen_R8_L12_OTHERDISSKINANDSUBCUTIS	IVW	3	-0.0881088	0.195564	0.652324
finngen_R8_G6_PARKINSON	IVW	3	-0.0892427	0.198638	0.653235
finngen_R8_CD2_BENIGN_MENINGES_CEREBRAL	IVW	3	-0.188627	0.419897	0.653272
finngen_R8_E4_FLUIDELECTRO	IVW	3	0.0605299	0.135021	0.653937
finngen_R8_Q17_LVOTO_BROAD	IVW	3	0.139852	0.311999	0.653977
finngen_R8_M13_CARTILAGE	IVW	3	-0.302433	0.675252	0.654239
finngen_R8_O15_PREG_ECTOP	IVW	3	-0.0881004	0.197621	0.655739
finngen_R8_N14_BREAST	IVW	3	0.0459202	0.103024	0.655797
finngen_R8_G6_MONOLOWOTHUNS	IVW	3	-0.338347	0.761995	0.657023
finngen_R8_G6_NEUATR	IVW	3	-0.186129	0.419484	0.657252
finngen_R8_K11_PARODON_PERIAPIC_CHRONIC	IVW	3	0.117074	0.26434	0.657844
finngen_R8_K11_OESOBST	IVW	3	-0.179646	0.407431	0.659269
finngen_R8_K11_ALCOLIV	IVW	3	0.10634	0.241279	0.659405
finngen_R8_G6_POLYOTHUNS	IVW	3	0.0783271	0.178238	0.660334
finngen_R8_O15_MATERN_CARE	IVW	3	0.0321843	0.0737077	0.662367
finngen_R8_N14_BARTHOCYS	IVW	3	0.17113	0.392511	0.662846
finngen_R8_E4_MINERAL_MET	IVW	3	-0.12151	0.278836	0.662999
finngen_R8_M13_OSTEOPOROSIS	IVW	3	-0.100973	0.232766	0.664436
finngen_R8_Z21_TOBAC_USE	IVW	3	-0.157726	0.363627	0.664465
finngen_R8_J10_LARYNGITIS	IVW	3	0.192735	0.444818	0.664804
finngen_R8_K11_GASTRODUOULC	IVW	3	-0.0586086	0.136081	0.666695
finngen_R8_ASTHMA_OPPORTUNIST_INFECTIONS	IVW	3	0.160739	0.374176	0.6675
finngen_R8_M13_IMPINGEMENT	IVW	3	0.0595117	0.138577	0.667596
finngen_R8_H7_IRIDOCYCLITIS	IVW	3	-0.0655216	0.152663	0.667785
finngen_R8_MYELOPROF_NONCML	IVW	3	0.141551	0.330388	0.668333
finngen_R8_ULCERILEO	IVW	3	-0.154356	0.360702	0.6687
finngen_R8_F5_SCHOLA	IVW	3	-0.16104	0.377963	0.670055
finngen_R8_G6_DYSTON	IVW	3	0.315979	0.741648	0.670072
finngen_R8_J10_ACUTEUPPERINFEC	IVW	3	0.0305504	0.0718224	0.670574
finngen_R8_O15_LABOUR_PELVIC_ABNORM	IVW	2	-0.0960612	0.226182	0.671049
finngen_R8_K11_PANCOTH	IVW	3	0.13262	0.312621	0.671405
finngen_R8_AB1_CANDIDIASIS	IVW	3	0.086928	0.20515	0.671764
finngen_R8_N14_FEMALE_GENITAL_DYSPLASIA_ALL	IVW	3	0.0582013	0.137452	0.671982
finngen_R8_F5_DEPPER	IVW	3	0.216977	0.513122	0.672401
finngen_R8_N14_ENDOMETRIOSIS_NOS	IVW	3	-0.102038	0.241372	0.672483
finngen_R8_Q17_OTHER_CONGEN_MALFO	IVW	3	0.106957	0.253395	0.672954
finngen_R8_L12_INFECT_DERM	IVW	3	0.165238	0.392842	0.674032
finngen_R8_N14_PROSTATITIS	IVW	3	-0.112447	0.26736	0.67406
finngen_R8_H8_HL_IDIOP	IVW	3	0.100625	0.239477	0.674349
finngen_R8_C3_RECTUM_EXALLC	IVW	3	-0.142902	0.342092	0.676144
finngen_R8_CD2_BENIGN_LIPO_SKIN_LIMBS	IVW	3	-0.17093	0.409873	0.676654
finngen_R8_L12_URTICA_DERTMATOG	IVW	3	0.12337	0.295865	0.676692
finngen_R8_THYROIDITIS	IVW	3	-0.126389	0.303361	0.676951
finngen_R8_H8_OTHHEARINGLOSS	IVW	3	-0.0580965	0.139721	0.677553
finngen_R8_I9_VASCSYND	IVW	3	-0.195228	0.471315	0.678713
finngen_R8_K11_PERITON	IVW	3	-0.100897	0.244222	0.679508
finngen_R8_ALCO_PRESCRIPTION	IVW	3	-0.103058	0.250203	0.680413
finngen_R8_N14_BREASTDISOTH	IVW	3	-0.113513	0.277544	0.682546
finngen_R8_C3_MENINGIOMA_EXALLC	IVW	3	-0.154721	0.379402	0.683419
finngen_R8_L12_EPIDERMALTHICKOTH	IVW	3	-0.158348	0.388543	0.683609
finngen_R8_K11_OTHINT	IVW	3	-0.0952893	0.234454	0.684427
finngen_R8_RX_CROHN_2NDLINE	IVW	3	-0.0382365	0.0942299	0.684905
finngen_R8_H7_MYOPIA	IVW	3	-0.110092	0.271437	0.685044
finngen_R8_L12_EPIDERMTHICKNAS	IVW	3	-0.197225	0.486601	0.685249
finngen_R8_G6_CERCYST	IVW	3	0.218469	0.539366	0.685443
finngen_R8_MACULA_NAS	IVW	3	-0.0892568	0.220921	0.686197
finngen_R8_TEMPOROMANDIB	IVW	3	0.0853047	0.211356	0.686501
finngen_R8_I9_LYMPHOTH	IVW	3	0.225291	0.558713	0.686778
finngen_R8_D3_IMMUDEF	IVW	3	0.141691	0.351561	0.686923
finngen_R8_G6_MYONEU	IVW	3	-0.10066	0.249756	0.686924
finngen_R8_I9_ATHSCLE	IVW	3	0.0515811	0.128003	0.686972
finngen_R8_M13_GIANTCELL	IVW	3	-0.180886	0.449794	0.687571
finngen_R8_FG_CVD	IVW	3	0.0344361	0.0857708	0.68806
finngen_R8_H8_EXTERNAL	IVW	3	-0.05283	0.13159	0.688071
finngen_R8_G6_NEUROOTH	IVW	3	0.125044	0.31149	0.688098
finngen_R8_N14_PROSTAOTH	IVW	3	-0.162945	0.407658	0.689369
finngen_R8_CD2_BENIGN_SALIVARY_NOS	IVW	3	0.248451	0.62195	0.689547
finngen_R8_I9_OTHILLHEART	IVW	3	0.129609	0.324524	0.689612
finngen_R8_CPAP	IVW	3	-0.0634073	0.15954	0.691044
finngen_R8_H7_BLINDANDVISIMPAIRMENT	IVW	3	-0.162268	0.408352	0.691092
finngen_R8_ILD_INSUFFICIENCY	IVW	3	-0.18805	0.474234	0.69171
finngen_R8_CD2_BENIGN_DESCENDING_COLON	IVW	3	-0.12916	0.32639	0.692309
finngen_R8_O15_PRETERM	IVW	3	-0.0725724	0.183871	0.69307
finngen_R8_CIRRHOSIS_BROAD	IVW	3	-0.0800938	0.203383	0.693724
finngen_R8_I9_VHD	IVW	3	0.0269252	0.0685624	0.694533
finngen_R8_AB1_BACT_INTEST_OTH	IVW	3	0.0902536	0.22984	0.694556
finngen_R8_G6_OTHDEMYEL	IVW	3	0.157849	0.402259	0.694759
finngen_R8_L12_SEBORRKERAT	IVW	3	-0.0698016	0.177944	0.694861
finngen_R8_H7_KERATOCONUS	IVW	3	-0.186855	0.477099	0.695318
finngen_R8_H7_DIPLOPIA	IVW	3	0.0830269	0.211996	0.695322
finngen_R8_PD2ND_EXMORE	IVW	3	0.266499	0.68099	0.695546
finngen_R8_I9_ENDOCARD	IVW	3	0.212679	0.544394	0.696041
finngen_R8_O15_POLYHYDR	IVW	3	-0.179492	0.460167	0.696493
finngen_R8_THYROTOXICOSIS	IVW	3	-0.0560824	0.143865	0.696664
finngen_R8_H8_NOISEINNER	IVW	3	-0.154769	0.397583	0.697073
finngen_R8_L12_VASCULITISNAS	IVW	3	0.256984	0.66348	0.698514
finngen_R8_O15_LABOUR_UMBILICAL	IVW	3	-0.132429	0.343021	0.699446
finngen_R8_M13_TRIGGERFINGER	IVW	3	-0.0924228	0.239416	0.699471
finngen_R8_CHOLELITH_BROAD	IVW	3	-0.0270979	0.0703002	0.699897
finngen_R8_L12_DERMATITISNAS	IVW	3	0.0346576	0.0900087	0.700202
finngen_R8_K11_CHOLECYST	IVW	3	0.0761127	0.197758	0.700328
finngen_R8_H8_HL_PRESBY	IVW	3	-0.112206	0.291779	0.700564
finngen_R8_SLE_STRICT	IVW	2	-0.53543	1.3932	0.700744
finngen_R8_CD2_BENIGN_OTHERDIGESTIVE	IVW	3	0.0704111	0.183471	0.701147
finngen_R8_E4_LIPOPROTNAS	IVW	3	-0.0779481	0.203153	0.701207
finngen_R8_O15_DELIV_PERIN_LACER	IVW	3	-0.142446	0.371832	0.70165
finngen_R8_RHEUMA_SEROPOS_WIDE	IVW	3	0.0597328	0.156048	0.701879
finngen_R8_I9_NONISCHCARDMYOP	IVW	3	-0.051958	0.135906	0.702233
finngen_R8_M13_CONNECTNAS	IVW	3	0.151942	0.398056	0.702676
finngen_R8_C3_FEMALE_GENITAL_EXALLC	IVW	3	-0.0689501	0.180667	0.702726
finngen_R8_L12_ALOPECAREATA	IVW	3	0.192578	0.506971	0.704049
finngen_R8_N14_OTHNONINFCERVIX	IVW	3	-0.15916	0.420586	0.705116
finngen_R8_M13_ANKYLOSPON	IVW	3	0.0908073	0.240058	0.705228
finngen_R8_E4_HYPERKALAEMIA	IVW	3	0.176599	0.469088	0.706565
finngen_R8_I9_SAH	IVW	3	-0.103788	0.276206	0.707092
finngen_R8_H7_PARASTRAB	IVW	3	-0.169071	0.450429	0.707396
finngen_R8_O15_POOR_FETGRO	IVW	3	0.082276	0.22031	0.708809
finngen_R8_L12_IMPETIGO	IVW	3	0.169867	0.456805	0.709998
finngen_R8_E4_PCOS_BROAD	IVW	3	-0.0865872	0.233434	0.710691
finngen_R8_SMOKING	IVW	3	0.0865249	0.233512	0.710982
finngen_R8_K11_DULC	IVW	3	-0.0798979	0.216544	0.712151
finngen_R8_I9_SAHANEUR	IVW	3	-0.0796076	0.215969	0.712421
finngen_R8_K11_ATTRITION	IVW	3	-0.240498	0.65396	0.713055
finngen_R8_RHEUMA_SEROPOS	IVW	3	0.0526059	0.14321	0.71337
finngen_R8_RHEUMA_SEROPOS_STRICT	IVW	3	0.0710147	0.193618	0.713785
finngen_R8_M13_ARTHTROSIS_COX_PRIM_ICD10	IVW	3	-0.0552605	0.150737	0.713915
finngen_R8_DM_NEPHROPATHY_EXMORE	IVW	3	0.0937628	0.256309	0.7145
finngen_R8_FE_STRICT	IVW	3	0.0611116	0.168241	0.716427
finngen_R8_K11_MN_RETRGN_AND_SURG	IVW	3	0.183199	0.504545	0.716532
finngen_R8_L12_BULLOTH	IVW	3	-0.173711	0.480145	0.71751
finngen_R8_D3_ANAEMIA	IVW	3	0.0555527	0.153757	0.717874
finngen_R8_E4_DM2NEU	IVW	3	0.10915	0.302845	0.718537
finngen_R8_K11_REFLUX	IVW	3	-0.0359119	0.100217	0.720089
finngen_R8_K11_APPENDOTH	IVW	3	0.0897419	0.253106	0.722917
finngen_R8_K11_CD_STRICT2	IVW	3	-0.158551	0.447769	0.723271
finngen_R8_O15_OBSTET_TRAUMA_OTHER	IVW	3	-0.119537	0.339245	0.724568
finngen_R8_F5_DEPRESSIO	IVW	3	0.0349425	0.0996733	0.725911
finngen_R8_H7_CORNEALSCAR	IVW	3	-0.202814	0.579403	0.726309
finngen_R8_ULCERPROCT	IVW	3	0.162901	0.466231	0.72679
finngen_R8_I9_LBBB	IVW	3	0.104149	0.298105	0.726811
finngen_R8_ASTHMA_ACUTE_RESPIRATORY_INFECTIONS	IVW	3	0.0571478	0.163752	0.727096
finngen_R8_L12_CELLULITIS	IVW	3	0.0823233	0.236095	0.727325
finngen_R8_I9_OTHOTH	IVW	3	0.180933	0.519249	0.727501
finngen_R8_F5_NEUROTICOTH	IVW	3	-0.11225	0.322877	0.7281
finngen_R8_M13_DORSOPATHYNAS	IVW	3	-0.146601	0.421979	0.728281
finngen_R8_M13_HYPERMOBILITY	IVW	3	-0.116	0.334854	0.729028
finngen_R8_M13_DISSYNOTENDNAS	IVW	3	-0.125941	0.367538	0.731853
finngen_R8_AB1_STREPTO_SEPSIS	IVW	3	-0.120291	0.351219	0.731979
finngen_R8_M13_SOFTOVERUSE	IVW	3	-0.0495388	0.145025	0.732661
finngen_R8_F5_SCHIZPER	IVW	3	-0.182516	0.536191	0.733559
finngen_R8_I9_ABAORTANEUR	IVW	3	0.0842443	0.249328	0.735449
finngen_R8_E4_OBESITY	IVW	3	0.0310346	0.0919455	0.735715
finngen_R8_CHRONNAS	IVW	3	0.0965462	0.28658	0.736199
finngen_R8_KRA_PSY_SPEELING_EXMORE	IVW	3	0.09088	0.27114	0.737491
finngen_R8_CD2_BENIGN_KIDNEY	IVW	3	0.151165	0.456452	0.740513
finngen_R8_CD2_BENIGN_LIPO_SKIN_HEADFACENECK	IVW	3	-0.100795	0.305038	0.741072
finngen_R8_N14_TUBULOINTNEPHRNAS	IVW	3	0.0913795	0.277176	0.741642
finngen_R8_F5_PANIC	IVW	3	0.0621613	0.188864	0.742055
finngen_R8_K11_FISTULA	IVW	3	-0.0448724	0.136968	0.743205
finngen_R8_I9_CARDARR	IVW	3	0.0907379	0.276992	0.743227
finngen_R8_K11_APHTA_RECUR	IVW	3	0.119664	0.366491	0.744036
finngen_R8_M13_OVERUSENAS	IVW	3	0.1487	0.455934	0.744315
finngen_R8_G6_ENCEPHOTH	IVW	3	0.15762	0.483346	0.744347
finngen_R8_J10_EMPHYSEMA	IVW	3	0.0972625	0.29842	0.744481
finngen_R8_O15_ANTENAT_ABNORM	IVW	3	-0.0961447	0.295238	0.744688
finngen_R8_I9_CABG	IVW	3	0.0703462	0.217496	0.746364
finngen_R8_C3_CORPUS_UTERI_EXALLC	IVW	3	0.132806	0.411397	0.746833
finngen_R8_F5_MILDRET	IVW	3	0.201097	0.627927	0.748775
finngen_R8_M13_FOREIGNBODY	IVW	3	0.14874	0.467568	0.750399
finngen_R8_F5_VASCDEM	IVW	3	0.128525	0.406175	0.751679
finngen_R8_H7_ANISOMETROPIA	IVW	3	0.146243	0.462305	0.751749
finngen_R8_CD2_BENIGN_ASCENDING_COLON	IVW	3	-0.0736032	0.233067	0.752153
finngen_R8_N14_HYDRONEPHR	IVW	3	-0.071543	0.227938	0.753619
finngen_R8_M13_GANGLION	IVW	3	-0.0474751	0.15151	0.754018
finngen_R8_NECROVASC_FG	IVW	3	-0.0969406	0.310908	0.755194
finngen_R8_M13_SYNOTEND	IVW	3	-0.0325012	0.104497	0.755781
finngen_R8_AUTOIMMUNE_NONTHYROID	IVW	3	-0.0281386	0.0913115	0.75796
finngen_R8_I9_VEINSOTH	IVW	3	-0.0577861	0.187523	0.757964
finngen_R8_F5_GAD	IVW	3	0.0751681	0.244253	0.758275
finngen_R8_RHEUMA_SEROPOS_OTH	IVW	3	0.0482604	0.157362	0.759083
finngen_R8_I9_MI_STRICT	IVW	3	0.0727456	0.237509	0.759388
finngen_R8_D3_BLOODNAS	IVW	3	-0.156685	0.512971	0.760026
finngen_R8_VD_SC	IVW	3	0.209042	0.684884	0.760196
finngen_R8_H7_BINOCUMOVOTH	IVW	3	0.160732	0.526837	0.760299
finngen_R8_FG_OTHHEART	IVW	3	0.0292526	0.0963852	0.761512
finngen_R8_BRONCHITIS	IVW	3	-0.0194602	0.064133	0.761558
finngen_R8_I9_STR	IVW	3	-0.0262441	0.0870797	0.763125
finngen_R8_H7_GLAUCOMA_XFG	IVW	3	-0.0956619	0.317476	0.763171
finngen_R8_M13_MUSCULOSKELEOTH	IVW	3	-0.103954	0.346013	0.763847
finngen_R8_H7_MACULADEGEN	IVW	3	-0.0373515	0.125642	0.766249
finngen_R8_K11_ORAL_LEUCOPLACIA_INCLAVO	IVW	3	0.218267	0.735805	0.766743
finngen_R8_AB1_VIRAL_HEMOR_FEVER_NOS	IVW	3	0.0934795	0.315515	0.76702
finngen_R8_CD2_BENIGN_LIPOMATOUS	IVW	3	0.0597085	0.202313	0.767895
finngen_R8_ST19_FRACT_FEMUR	IVW	3	0.0428054	0.145243	0.768211
finngen_R8_AD_EO_EXMORE	IVW	3	0.111869	0.379753	0.768313
finngen_R8_I9_HYPTENSHD	IVW	3	-0.043688	0.148863	0.769157
finngen_R8_G6_PARDIPLE	IVW	3	0.155266	0.529244	0.769237
finngen_R8_C3_OVARY_EXALLC	IVW	3	-0.116552	0.399177	0.770301
finngen_R8_N14_DISIMPAIRRENTUB	IVW	3	-0.126843	0.434693	0.770439
finngen_R8_M13_LATERALEPICOND	IVW	3	-0.0713124	0.245195	0.771174
finngen_R8_CD2_BENIGN_SMALL_INTESTINE	IVW	3	0.115945	0.400665	0.772289
finngen_R8_M13_MUSCLEDISNAS	IVW	3	0.195379	0.675461	0.772388
finngen_R8_I9_LYMPHADE	IVW	3	0.085723	0.298023	0.773623
finngen_R8_H7_GLAUCOMA_POAG	IVW	3	-0.0436877	0.152539	0.77457
finngen_R8_I9_AORTDIS	IVW	3	-0.122138	0.427113	0.774908
finngen_R8_M13_CERVICOCRANSDR	IVW	3	-0.0665682	0.233249	0.775341
finngen_R8_N14_OVARTORS	IVW	3	-0.145602	0.510556	0.775504
finngen_R8_D3_COAGDEF_PURPUR_HAEMORRHAGIC	IVW	3	0.0482568	0.169825	0.776291
finngen_R8_PULM_INFECTIONS	IVW	3	-0.012806	0.0451362	0.776626
finngen_R8_N14_MALEINFERT	IVW	3	-0.103496	0.364835	0.776656
finngen_R8_I9_CHD	IVW	3	0.0387015	0.136907	0.777419
finngen_R8_L12_SEBORRHOEIC	IVW	3	-0.111445	0.395184	0.777937
finngen_R8_H8_CHRON_SUPOTITIS	IVW	3	-0.077511	0.276094	0.778909
finngen_R8_I9_NONISCHCARDMYOP_STRICT	IVW	3	0.0873353	0.312285	0.779734
finngen_R8_L12_INTERNALSUBSTANCEDERM	IVW	3	-0.0719365	0.258296	0.780625
finngen_R8_I9_HYPTENSESS	IVW	3	0.0322327	0.115778	0.780705
finngen_R8_L12_FOLICULAROTH	IVW	3	-0.082785	0.298409	0.781457
finngen_R8_N14_ENDOMETRIOSIS_DEEP	IVW	3	-0.0661561	0.240763	0.783487
finngen_R8_AUTOIMMUNE_NONTHYROID_STRICT	IVW	3	-0.027785	0.101598	0.784484
finngen_R8_M13_BONEDISNAS	IVW	3	-0.200797	0.736143	0.785031
finngen_R8_K11_HEPFAIL	IVW	3	0.175375	0.643129	0.785091
finngen_R8_Q17_CONGEN_MALFO_AORTIC_MITRAL_VALVES	IVW	3	-0.177177	0.652348	0.78593
finngen_R8_G6_HYDROCEPH	IVW	3	0.0879556	0.324333	0.786245
finngen_R8_K11_APHTA_RECUR_INCLAVO	IVW	3	0.0842932	0.312202	0.787164
finngen_R8_M13_PANNICULITIS	IVW	3	0.127036	0.471618	0.787651
finngen_R8_CD2_NONHODGKIN_NAS_EXALLC	IVW	3	-0.17652	0.661034	0.789441
finngen_R8_VD_U	IVW	3	0.104154	0.393744	0.791377
finngen_R8_M13_DEFORMDORSO	IVW	3	0.0349653	0.132716	0.792196
finngen_R8_E4_OBESITYCAL	IVW	3	0.0286718	0.108907	0.792343
finngen_R8_CD2_BENIGN_ADRENAL	IVW	3	0.0974476	0.375194	0.795075
finngen_R8_K11_ANOMALI_DENTAL_ARCH_RELATIONS1_INCLAVO	IVW	3	-0.0557419	0.21479	0.795235
finngen_R8_I9_VASCDEM	IVW	3	0.101646	0.392426	0.795621
finngen_R8_N14_GLOMERULAR	IVW	3	0.0638644	0.247323	0.796235
finngen_R8_E4_VOLUME	IVW	3	-0.072253	0.279852	0.796266
finngen_R8_KRA_PSY_SLEEP_NONORG_EXMORE	IVW	3	0.0559395	0.217479	0.79701
finngen_R8_M13_CERVICDISC	IVW	3	-0.0393895	0.153713	0.797754
finngen_R8_COPD_EARLY	IVW	3	-0.0502548	0.198071	0.799711
finngen_R8_N14_BARTHOABSCESS	IVW	3	0.128789	0.509231	0.800338
finngen_R8_H7_CONJUNCTIVITISATOPIC	IVW	3	-0.14079	0.559748	0.801408
finngen_R8_M13_TEMPARTERIT	IVW	3	-0.107362	0.427145	0.801546
finngen_R8_DEATH	IVW	3	-0.018818	0.0749903	0.801862
finngen_R8_O15_COMPLIC_ABORT_ECTOP_MOLAR	IVW	3	-0.0999987	0.39884	0.802028
finngen_R8_Q17_LVOTO_NARROW	IVW	3	-0.167751	0.671995	0.802873
finngen_R8_O15_POSTPART_DEPR	IVW	3	0.0279997	0.112285	0.80308
finngen_R8_H7_IRIDOCYC_ANTER	IVW	3	-0.0394622	0.160576	0.805872
finngen_R8_RHEUMA_OTHER_WIDE	IVW	3	-0.0402249	0.16459	0.806926
finngen_R8_KRA_PSY_MOOD_EXMORE	IVW	3	0.0238545	0.0980985	0.807875
finngen_R8_M13_MUSCLESTRAIN	IVW	2	0.124995	0.515616	0.808456
finngen_R8_M13_RHEUMA	IVW	3	-0.0390665	0.161304	0.808632
finngen_R8_F5_EMOCHILD	IVW	3	0.0958606	0.399312	0.81028
finngen_R8_F5_STIMUL	IVW	3	-0.104191	0.438827	0.812323
finngen_R8_O15_HAEMORRH_EARLY_PREG	IVW	3	0.0317904	0.134902	0.8137
finngen_R8_O15_CONCEPT_ABNORM	IVW	3	0.0399319	0.169478	0.81373
finngen_R8_L12_PSORI_ARTHRO	IVW	3	-0.0527119	0.223828	0.813819
finngen_R8_N14_IMPOTENCE	IVW	3	0.102223	0.435384	0.814374
finngen_R8_L12_FOLLICULARCYST	IVW	3	-0.0410632	0.175067	0.814552
finngen_R8_J10_CHRONLARYNGITIS	IVW	3	0.0602843	0.257775	0.815091
finngen_R8_N14_CHRONEPHROPATH	IVW	3	0.0882443	0.38045	0.816579
finngen_R8_L12_ATOPIC	IVW	3	-0.0269154	0.11632	0.817012
finngen_R8_F5_SEDAHYP	IVW	3	-0.0735126	0.320984	0.818852
finngen_R8_C3_DIGESTIVE_ORGANS_EXALLC	IVW	3	0.0290136	0.127057	0.819374
finngen_R8_N14_BENIGNMAMDYSP	IVW	3	0.0444567	0.195567	0.820173
finngen_R8_K11_GINGIVITIS_PERIODONTAL	IVW	3	0.0116158	0.0514375	0.821338
finngen_R8_ULCERRECT	IVW	3	0.0581669	0.261079	0.823695
finngen_R8_AD_AM_EXMORE	IVW	3	0.0693382	0.31144	0.823818
finngen_R8_K11_OTHABDHER	IVW	3	-0.0873031	0.393169	0.824275
finngen_R8_TRAUMBRAIN_NONCONCUS	IVW	3	0.0647965	0.293382	0.825201
finngen_R8_AB1_GONOCOCCAL	IVW	3	-0.216541	0.98467	0.825939
finngen_R8_CD2_BENIGN_HEMANGIOMA	IVW	3	-0.0594316	0.271412	0.826672
finngen_R8_I9_OTHARR	IVW	3	0.0180875	0.0829331	0.827353
finngen_R8_CD2_BENIGN_CONNSOFT_UPPERLIMB	IVW	3	0.109006	0.500243	0.827502
finngen_R8_INFLUENZA	IVW	3	-0.0393504	0.181516	0.828374
finngen_R8_CD2_BENIGN_LEIOMYOMA_UTERI	IVW	3	-0.0238065	0.11022	0.828996
finngen_R8_E4_HYPOPARA	IVW	3	0.0916703	0.425642	0.829479
finngen_R8_N14_FEMALE_GENITAL_HSIL	IVW	3	-0.036119	0.169479	0.831235
finngen_R8_NAFLD	IVW	3	-0.0584293	0.276257	0.832494
finngen_R8_L12_LICHSIMPANDPRURIGO	IVW	3	-0.0667595	0.316472	0.832927
finngen_R8_K11_HERING	IVW	3	0.0219051	0.104286	0.83363
finngen_R8_C3_NSCLC_SQUAM_EXALLC	IVW	3	0.0907521	0.43226	0.833708
finngen_R8_F5_MOOD	IVW	3	0.0240451	0.114561	0.833754
finngen_R8_AB1_VIRAL_CNS	IVW	3	-0.0575403	0.275225	0.834397
finngen_R8_CD2_BENIGN_URINARY	IVW	3	-0.0785315	0.37577	0.834457
finngen_R8_F5_SOCPHOB	IVW	3	0.0550007	0.26335	0.834565
finngen_R8_K11_IMPACTED_TEETH_INCLAVO	IVW	3	0.038011	0.182886	0.835355
finngen_R8_CD2_BENIGN_CRANIAL_NERVE	IVW	3	0.0987209	0.477022	0.836047
finngen_R8_M13_PATELLAOTH	IVW	3	0.0333824	0.161823	0.836564
finngen_R8_I9_HEARTFAIL_NS	IVW	3	-0.0139729	0.0679434	0.837061
finngen_R8_K11_ILEUS	IVW	3	-0.0351381	0.173472	0.839481
finngen_R8_KRA_PSY_SCHIZODEL_EXMORE	IVW	3	0.0331017	0.164248	0.840281
finngen_R8_H7_GLAUCSUSP	IVW	3	-0.0259751	0.129093	0.840532
finngen_R8_F5_ALCOHOL_DEPENDENCE	IVW	3	-0.0262558	0.131388	0.841611
finngen_R8_O15_FAILED_INDUCT	IVW	3	0.0686873	0.344328	0.841885
finngen_R8_O15_PREG_PROLONGED	IVW	3	-0.0392835	0.197099	0.842021
finngen_R8_D3_HAEMOLYTICANAEMIA	IVW	3	0.0871001	0.438953	0.842711
finngen_R8_AB1_VIRAL_HEPATITIS	IVW	3	-0.0765681	0.389543	0.844173
finngen_R8_H7_VISUDISTURB	IVW	3	-0.020546	0.10544	0.845504
finngen_R8_L12_PSORIASIS	IVW	3	0.0261868	0.135712	0.846991
finngen_R8_ALLERG_ASTHMA	IVW	3	-0.0257478	0.133981	0.847606
finngen_R8_ALCODELIRIUM	IVW	3	-0.05341	0.278855	0.848108
finngen_R8_J10_PLEUREFFUSION	IVW	3	-0.0369263	0.192868	0.848166
finngen_R8_MEMLOSS	IVW	3	-0.0632156	0.330715	0.84841
finngen_R8_F5_BEHAVE	IVW	3	-0.0247502	0.129757	0.848727
finngen_R8_K11_ORAL	IVW	3	0.00869177	0.0456253	0.848915
finngen_R8_E4_THYROIDITSUBAC	IVW	3	-0.101497	0.540699	0.851101
finngen_R8_H8_OTOSCLE	IVW	3	-0.0781207	0.417706	0.851642
finngen_R8_N14_VULVAL_DYSPLASIA_ALL	IVW	3	0.0717818	0.385403	0.852248
finngen_R8_N14_VULVAL_LSIL	IVW	3	-0.0861536	0.463901	0.852668
finngen_R8_Q17_OTHER_CONGEN_MALFO_FACE_NECK	IVW	3	-0.0831662	0.448951	0.853036
finngen_R8_G6_ROOTPLEXOTHUNS	IVW	3	-0.0466206	0.253924	0.854327
finngen_R8_H7_INTERHETEROTRO	IVW	3	-0.0583078	0.317721	0.854391
finngen_R8_K11_CROWDI_TEETH_INCLAVO	IVW	3	-0.0493523	0.269197	0.854538
finngen_R8_G6_MERALGIA	IVW	3	0.0811111	0.445376	0.85549
finngen_R8_F5_ALCOHOLAC	IVW	3	-0.0249579	0.137157	0.85561
finngen_R8_K11_OESITIS	IVW	3	-0.0680064	0.376334	0.856597
finngen_R8_ASTHMA_INFECTIONS	IVW	3	0.030207	0.169917	0.8589
finngen_R8_N14_HYPERTROPHYBREAST_BOTH	IVW	3	-0.0292982	0.165505	0.85949
finngen_R8_U22_COVID19_CONFIRMED	IVW	3	0.0723633	0.413201	0.860979
finngen_R8_G6_CPETAL	IVW	3	-0.08614	0.494551	0.861726
finngen_R8_K11_CHRONGASTR	IVW	3	0.0231234	0.133065	0.862042
finngen_R8_F5_SCHIZOTYP	IVW	3	0.0830556	0.484893	0.863999
finngen_R8_DM_VITREOUS_BLEEDING	IVW	3	0.0416232	0.243735	0.864403
finngen_R8_N14_MALEGEN	IVW	3	0.0185745	0.108985	0.86467
finngen_R8_G6_SPINOTH	IVW	3	0.0767102	0.452331	0.865334
finngen_R8_F5_DELIRIUM	IVW	3	0.0457351	0.273285	0.867092
finngen_R8_M13_ENTEROARTHR	IVW	3	0.0849299	0.510409	0.867846
finngen_R8_GENERALI_SKIN_ERUPT_DRUGS_MEDICAM	IVW	3	0.0658361	0.397961	0.868603
finngen_R8_I9_TIA	IVW	3	-0.0164871	0.0997302	0.868695
finngen_R8_L12_NAILDIS	IVW	3	-0.0450455	0.272514	0.868711
finngen_R8_AUTOIMMUNE	IVW	3	-0.0165118	0.100435	0.869413
finngen_R8_L12_OTHERSKINSUBCUTIS	IVW	3	-0.0147206	0.0908785	0.871321
finngen_R8_AB1_RUBELLA	IVW	3	0.0667947	0.412988	0.871514
finngen_R8_I9_HYPTENS	IVW	3	0.0189797	0.117707	0.8719
finngen_R8_E4_DM1COMA	IVW	3	0.0595854	0.373585	0.873278
finngen_R8_CARDIAC_ARRHYTM	IVW	3	0.0117008	0.074361	0.874968
finngen_R8_C3_LIVER_INTRAHEPATIC_BILE_DUCTS_EXALLC	IVW	3	0.0743257	0.474918	0.875637
finngen_R8_I9_HEARTFAIL_AND_CHD	IVW	3	0.0319595	0.205373	0.876335
finngen_R8_OFFICIAL_TILASTOKESKUS_DEATH	IVW	3	0.0585757	0.377593	0.876719
finngen_R8_M13_HALLUXRIGIDUS	IVW	3	0.0298861	0.192748	0.87678
finngen_R8_I9_ARTEMBTHRNAS	IVW	3	-0.0741654	0.479222	0.877009
finngen_R8_M13_BAKERCYST	IVW	3	-0.0432515	0.282731	0.878416
finngen_R8_KRA_PSY_SUBSTANCE_EXMORE	IVW	3	-0.0145514	0.0964095	0.880028
finngen_R8_DM_KETOACIDOSIS	IVW	3	-0.0223254	0.149184	0.881041
finngen_R8_DM_HYPOGLYC	IVW	3	0.0334984	0.224272	0.881266
finngen_R8_RX_N05C	IVW	3	-0.00841425	0.056495	0.881603
finngen_R8_Z21_PROBL_RELATED_MEDICAL_FACILITI_OTH_HEALTH_CARE	IVW	3	-0.0815693	0.547899	0.881651
finngen_R8_CD2_BENIGN_RECTOSIGMOID_JUNC	IVW	3	0.0607428	0.409227	0.882001
finngen_R8_E4_HYPERPARA	IVW	3	-0.0332276	0.225334	0.882769
finngen_R8_RX_GLUCOSAMINE	IVW	3	0.0169534	0.115294	0.883096
finngen_R8_H7_VITRBODYGLOBE	IVW	3	-0.0159167	0.108376	0.883238
finngen_R8_DRY_AMD	IVW	3	0.035127	0.239397	0.883344
finngen_R8_K11_MN_RETRGN	IVW	3	0.0457577	0.31347	0.883944
finngen_R8_N14_RENFAIL	IVW	3	0.0163501	0.112676	0.884626
finngen_R8_AB1_SEQULAE_INF_NOS	IVW	3	0.043189	0.312942	0.890233
finngen_R8_L12_PRURITUS	IVW	3	0.0325874	0.239778	0.891895
finngen_R8_K11_PERITONITIS	IVW	3	-0.0403107	0.297476	0.89221
finngen_R8_O15_COMPLIC_PUERP	IVW	3	0.02863	0.213818	0.893482
finngen_R8_DM_SEVERAL_COMPLICATIONS	IVW	3	0.0193054	0.144185	0.893487
finngen_R8_GOUT_NOS	IVW	3	-0.0237541	0.180364	0.895221
finngen_R8_N14_ENDOMETRIOSIS_UTERUS	IVW	3	-0.0261465	0.199768	0.895867
finngen_R8_M13_TIETZE	IVW	3	-0.0561618	0.430925	0.896307
finngen_R8_G6_ULLNLE	IVW	3	0.025944	0.199728	0.896648
finngen_R8_I9_THROMBOTH	IVW	3	0.0312133	0.241762	0.897273
finngen_R8_L12_PSORI_NAS	IVW	3	0.0404544	0.314236	0.897564
finngen_R8_RHEUMA_NOS	IVW	3	0.0446496	0.348315	0.898001
finngen_R8_F5_CANNABIS	IVW	3	-0.113044	0.88271	0.898098
finngen_R8_F5_SUBSNOALCO	IVW	3	0.0314929	0.246475	0.898328
finngen_R8_F5_SLEEP_NOS	IVW	3	-0.0933096	0.735681	0.899071
finngen_R8_G6_NEUINFL	IVW	3	-0.0492025	0.393584	0.900514
finngen_R8_L12_NAIL_INGROW	IVW	3	0.0410161	0.333292	0.902057
finngen_R8_K11_MIH_INCLAVO	IVW	3	-0.066825	0.543725	0.902185
finngen_R8_L12_HIDRADENITISSUP	IVW	3	0.0521468	0.426004	0.902575
finngen_R8_M13_SYSTCONNECT	IVW	3	-0.0161504	0.134572	0.904473
finngen_R8_RX_STATIN	IVW	3	0.00615115	0.0512794	0.90452
finngen_R8_C3_RESPIRATORY_INTRATHORACIC_EXALLC	IVW	3	-0.0195128	0.163639	0.905083
finngen_R8_N14_ENDOMETRIOSIS_RECTPVAGSEPT_VAGINA	IVW	3	-0.0406368	0.348033	0.907049
finngen_R8_CD2_BENIGN_TONGUE	IVW	3	0.0729181	0.627226	0.907451
finngen_R8_J10_BRONCHIECTASIS	IVW	3	0.045989	0.396352	0.907628
finngen_R8_O15_PUERP_SEPSIS	IVW	3	0.0235297	0.204078	0.90821
finngen_R8_G6_STATUSEPI	IVW	3	0.045467	0.397123	0.908849
finngen_R8_N14_OTHINFVAGVULV	IVW	3	0.0455352	0.403905	0.910239
finngen_R8_N14_CHRONKIDNEYDIS	IVW	3	-0.0156102	0.138479	0.910247
finngen_R8_C3_COLORECTAL_EXALLC	IVW	3	0.018689	0.167499	0.911159
finngen_R8_ALCOHOLACUTE10	IVW	3	-0.0187986	0.169103	0.911484
finngen_R8_KRA_PSY_MENTALRET_EXMORE	IVW	3	-0.0475781	0.429158	0.911724
finngen_R8_I9_CVD_HARD	IVW	3	0.0146718	0.133878	0.912734
finngen_R8_G6_MENINGBACT	IVW	3	-0.0442648	0.406615	0.913312
finngen_R8_N14_OTHNONINFUTER	IVW	3	0.021849	0.201027	0.913451
finngen_R8_O15_PUERP_INFECT_OTHER	IVW	3	0.029118	0.27158	0.914617
finngen_R8_ERECTILE_DYSFUNCTION	IVW	3	0.0561588	0.523911	0.914637
finngen_R8_I9_ANEURYSM	IVW	3	0.0302965	0.284931	0.915321
finngen_R8_M13_LOWBACKPAIN	IVW	3	-0.0137159	0.129897	0.915907
finngen_R8_E4_ENDODISNAS	IVW	3	-0.0555041	0.528726	0.916394
finngen_R8_G6_MYOPOTHUNS	IVW	3	0.0286464	0.273793	0.916671
finngen_R8_G6_HCNP	IVW	3	-0.0480268	0.469847	0.918584
finngen_R8_H7_CONVERSTRAB	IVW	3	-0.0382885	0.374939	0.918662
finngen_R8_L12_LICHENPLANUS	IVW	3	0.0237259	0.233645	0.919117
finngen_R8_Z21_PROCREATIVE_MANAG	IVW	3	-0.0127725	0.126	0.919257
finngen_R8_I9_PERICARD	IVW	3	-0.0416444	0.410858	0.919265
finngen_R8_E4_ADDISON	IVW	3	0.0429023	0.426533	0.919881
finngen_R8_L12_ROSACEANAS	IVW	3	-0.0553957	0.551223	0.91995
finngen_R8_FE_MODE	IVW	3	-0.035934	0.358238	0.9201
finngen_R8_CD2_BENIGN_FEMALE_GEN_OTH	IVW	3	0.0368982	0.377483	0.922133
finngen_R8_M13_SPONTRUPTSYNOTEND	IVW	3	-0.0507571	0.520142	0.922263
finngen_R8_C3_SQUOMOUS_CELL_CARCINOMA_SKIN_EXALLC	IVW	3	0.0230081	0.236407	0.922469
finngen_R8_O15_PREG_MATERN_CARE	IVW	3	0.0154715	0.159315	0.922637
finngen_R8_H7_GLOBE	IVW	3	0.0478798	0.504748	0.924427
finngen_R8_J10_ASTHMACOPDKELA	IVW	3	-0.011419	0.121737	0.925268
finngen_R8_L12_FOODDERMAT	IVW	3	-0.038898	0.419884	0.92619
finngen_R8_F5_ANAPER	IVW	3	0.0523712	0.568184	0.926561
finngen_R8_K11_SALIVARY	IVW	3	0.0204433	0.224554	0.927461
finngen_R8_SPONDYLOPATHY_FG	IVW	3	-0.0263009	0.294566	0.928854
finngen_R8_M13_EARLY_LUMBAR_PROLAPSE	IVW	3	-0.0158377	0.178317	0.929227
finngen_R8_O15_MATERN_CARE_DISPROP	IVW	3	0.0323457	0.366084	0.929594
finngen_R8_H7_OCUPAIN	IVW	3	-0.0247652	0.283812	0.930466
finngen_R8_N14_BARTHOOTHNAS	IVW	3	-0.0391358	0.449699	0.93065
finngen_R8_M13_THORACISPINEPAIN	IVW	3	0.0166691	0.191888	0.930776
finngen_R8_AB1_MYCOSES	IVW	3	-0.0124739	0.144709	0.931307
finngen_R8_I9_AF	IVW	3	0.0106269	0.123756	0.93157
finngen_R8_L12_PRURIGONOD	IVW	3	-0.0435136	0.522464	0.933625
finngen_R8_G6_BRACHPLE	IVW	3	0.0218533	0.264397	0.934127
finngen_R8_CD2_BENIGN_DUODENUM	IVW	3	-0.0416048	0.518102	0.935997
finngen_R8_I9_HEARTFAIL_ALLCAUSE	IVW	3	0.00924772	0.116017	0.936468
finngen_R8_AUD	IVW	3	-0.00835632	0.105201	0.936689
finngen_R8_I9_INTRACRA	IVW	3	0.0134608	0.170749	0.937165
finngen_R8_PNEUMO_SEPTHICHE	IVW	3	-0.034192	0.437398	0.937692
finngen_R8_CD2_BENIGN_OVARY	IVW	3	-0.015125	0.194402	0.937985
finngen_R8_E4_DM1KETO	IVW	3	-0.0314379	0.407814	0.938553
finngen_R8_C_DIFFICILE_ENTEROCOLITIS	IVW	3	0.0192675	0.253181	0.939338
finngen_R8_L12_LICHENSIMPLEX	IVW	3	0.032704	0.433615	0.939879
finngen_R8_O15_LABOUR_ABNORM_FORCES	IVW	3	0.016962	0.226617	0.940335
finngen_R8_WET_AMD	IVW	3	-0.0211257	0.288244	0.941574
finngen_R8_H7_AMD	IVW	3	-0.0181059	0.251714	0.942657
finngen_R8_F5_PSYCHOTH	IVW	3	-0.013748	0.193766	0.943437
finngen_R8_AB1_PEDICULOSIS_ACARIASIS_OTHERINFEST	IVW	3	-0.0231509	0.328724	0.943854
finngen_R8_CD2_NONFOLLICULAR_LYMPHOMA_EXALLC	IVW	3	0.0214998	0.306663	0.944107
finngen_R8_K11_COELIAC	IVW	3	0.0251336	0.360812	0.944466
finngen_R8_CD2_BENIGN_STOMACH	IVW	3	-0.0173731	0.250902	0.944797
finngen_R8_ST19_FRACT_SKULL_FACIAL_BONES	IVW	3	0.0157582	0.229422	0.945239
finngen_R8_I9_UAP	IVW	3	0.00835545	0.121934	0.945368
finngen_R8_O15_AMNIOT_OTHER	IVW	3	-0.0140477	0.205844	0.945591
finngen_R8_M13_HALLUXVALGUS	IVW	3	-0.00747504	0.112528	0.947037
finngen_R8_J10_PNEUMOPNEUMO	IVW	3	0.033126	0.500748	0.947256
finngen_R8_K11_OTHILEUS	IVW	3	0.0119412	0.180739	0.947323
finngen_R8_OSTEOPOROSIS_FRACTURE_FG	IVW	3	0.0212513	0.322075	0.947392
finngen_R8_M13_ENTESOPATHYLOWNAS	IVW	3	0.0188264	0.285848	0.947488
finngen_R8_L12_ERYTHEMAMULTIF	IVW	3	0.0334367	0.515364	0.94827
finngen_R8_L12_GRANULOMATOUSSKIN	IVW	3	-0.0336291	0.527954	0.949211
finngen_R8_M13_ARTHROSIS_KNEE_PRIM_KNEESURG	IVW	3	-0.00769775	0.120905	0.949235
finngen_R8_C3_MALE_GENITAL_EXALLC	IVW	3	-0.00787189	0.124565	0.949611
finngen_R8_N14_OTHETNASKIDUR	IVW	3	0.0267679	0.430306	0.950398
finngen_R8_L12_PAPULOSQUAMOUS	IVW	3	0.00706206	0.114166	0.950676
finngen_R8_K11_DENTOFACIAL_ANOMALIES	IVW	3	0.00797507	0.132621	0.952049
finngen_R8_O15_BIRTH_BREAT_INFECT	IVW	3	0.0250673	0.420341	0.952446
finngen_R8_I9_HEARTFAIL_EXMORE	IVW	3	0.00637116	0.108138	0.953018
finngen_R8_E4_HYPOKALAEMIA	IVW	3	-0.0133144	0.22855	0.953545
finngen_R8_I9_STR_EMBOLIC	IVW	3	0.027315	0.470312	0.953686
finngen_R8_CD2_BENIGN_UTERUS_NOS	IVW	3	0.021463	0.374967	0.954354
finngen_R8_CHILDHOOD_ALLERGY	IVW	3	0.0108698	0.189983	0.954374
finngen_R8_M13_SACROILIITIS	IVW	3	-0.0325875	0.580534	0.955235
finngen_R8_K11_OTHDISDIG	IVW	3	-0.00898987	0.162528	0.955889
finngen_R8_M13_BICIPITALTEND	IVW	3	-0.0194551	0.352049	0.955929
finngen_R8_AB1_VIRAL_NOS	IVW	3	0.00920086	0.167519	0.956199
finngen_R8_N14_FEMGENPROL	IVW	3	0.00656456	0.120542	0.95657
finngen_R8_F5_MOODOTH	IVW	3	0.0148932	0.276759	0.957084
finngen_R8_H7_RETIVASCOCCLUSION	IVW	3	-0.0119449	0.225121	0.957684
finngen_R8_F5_SCHZPHR	IVW	3	-0.0119801	0.232446	0.958896
finngen_R8_O15_ABORT_UNS	IVW	3	0.0190701	0.371401	0.959049
finngen_R8_M13_SPININSTAB	IVW	3	-0.0221861	0.438927	0.959687
finngen_R8_D3_ACUTEPOSTBLEEDANAEMIA	IVW	3	0.0344786	0.683619	0.959775
finngen_R8_C3_CANCER_EXALLC	IVW	3	0.00270618	0.0547586	0.960584
finngen_R8_I9_HEARTFAIL_AND_OVERWEIGHT	IVW	3	0.00829283	0.174559	0.962109
finngen_R8_M13_RADICULOPATHY	IVW	3	-0.00939767	0.199353	0.962401
finngen_R8_F5_SOMATOFORM	IVW	3	-0.00845079	0.179537	0.962458
finngen_R8_POLYCYTVERA	IVW	3	0.0307148	0.653952	0.962539
finngen_R8_K11_OTHENTERCOL	IVW	3	0.00677249	0.145106	0.962774
finngen_R8_E4_DM1NASCOMP	IVW	3	-0.0099377	0.238821	0.966808
finngen_R8_N14_CERVICAL_HSIL	IVW	3	0.00696023	0.177614	0.968741
finngen_R8_E4_CONGEIOD	IVW	3	0.0327461	0.844427	0.969067
finngen_R8_VIT_DEF	IVW	3	0.0206537	0.556843	0.970413
finngen_R8_K11_CONSTIPATION	IVW	3	0.00271647	0.073841	0.970654
finngen_R8_N14_URETHRALSTRICT	IVW	3	0.0117519	0.323536	0.971024
finngen_R8_F5_OTHERSUB	IVW	3	0.0126519	0.352206	0.971345
finngen_R8_H7_RETINAVASC	IVW	3	0.00832309	0.23361	0.971579
finngen_R8_N14_EROSECTROPUT	IVW	3	-0.0157513	0.44604	0.97183
finngen_R8_THROMBOCYTAEMIA	IVW	3	0.0147962	0.419465	0.971861
finngen_R8_N14_SPERMATOCELE	IVW	3	0.0097898	0.277558	0.971863
finngen_R8_N14_ORHCEPINDIDYMITIS	IVW	3	-0.00878273	0.25211	0.97221
finngen_R8_C3_LIP_ORAL_PHARYNX_EXALLC	IVW	3	-0.0109749	0.318579	0.972519
finngen_R8_H7_PRESBYOPIA	IVW	3	-0.013015	0.381857	0.972811
finngen_R8_K11_CHOLECYSTECTOMY	IVW	3	0.00275772	0.0820263	0.97318
finngen_R8_E4_OBESITYXTRMALV	IVW	3	0.0205885	0.642034	0.974418
finngen_R8_E4_PARATHYRO	IVW	3	0.00759227	0.252531	0.976016
finngen_R8_D3_SCNDPOLYCYTHAEMIA	IVW	3	-0.0145534	0.519145	0.977636
finngen_R8_K11_OTHFUNC	IVW	3	-0.00471674	0.168758	0.977702
finngen_R8_N14_SALPHOOPH	IVW	3	-0.0044687	0.170692	0.979114
finngen_R8_H7_CONJUNCTDEGDEPOT	IVW	3	0.0134085	0.531519	0.979874
finngen_R8_N14_GLOMEINOTH	IVW	3	-0.00951912	0.383381	0.980191
finngen_R8_N14_INFLAMMBREAST	IVW	3	0.00788255	0.318416	0.98025
finngen_R8_K11_HAEMORR	IVW	3	-0.00456953	0.195655	0.981367
finngen_R8_C3_BRONCHUS_LUNG_EXALLC	IVW	3	-0.00395151	0.17468	0.981952
finngen_R8_OSTPOPATFRCTURE_POSTEMENO	IVW	3	0.00801541	0.354466	0.981959
finngen_R8_M13_ACHILLESTEND	IVW	3	-0.00506511	0.229199	0.982369
finngen_R8_D3_ANAEMIA_IRONDEF	IVW	3	-0.00360784	0.163406	0.982385
finngen_R8_H8_EXT_NAS	IVW	3	0.00545694	0.249665	0.982562
finngen_R8_D3_OTHERBLOOD	IVW	3	-0.00669219	0.321129	0.983374
finngen_R8_G6_MEDLEOTH	IVW	3	0.0103372	0.503633	0.983624
finngen_R8_PSORI_STRICT	IVW	3	0.0129515	0.636934	0.983777
finngen_R8_G6_XTRAPYROTH	IVW	3	0.00475214	0.235034	0.983869
finngen_R8_G6_CARPTU	IVW	3	-0.00397832	0.208612	0.984785
finngen_R8_C3_PROSTATE_EXALLC	IVW	3	0.00239012	0.127149	0.985002
finngen_R8_K11_OTHDIG	IVW	3	-0.00181601	0.103395	0.985987
finngen_R8_H8_MENIERE	IVW	3	-0.00403887	0.242736	0.986725
finngen_R8_DM_POLYNEURO	IVW	3	0.00745469	0.465829	0.987232
finngen_R8_E4_ENDOGLAND	IVW	3	-0.00168565	0.109887	0.987761
finngen_R8_F5_DEMNAS	IVW	3	-0.00321574	0.221643	0.988424
finngen_R8_H8_CERUMEN	IVW	3	-0.00425083	0.295391	0.988518
finngen_R8_G6_XTRAPYR	IVW	3	-0.00284044	0.199653	0.988649
finngen_R8_OTHER_SYSTCON_FG	IVW	3	0.00188885	0.140564	0.989279
finngen_R8_CD2_BENIGN_UTERUS_OTH	IVW	3	0.00441074	0.333067	0.989434
finngen_R8_I9_STR_EMBOLIC_WITH_FLIMMER	IVW	3	-0.00858053	0.678109	0.989904
finngen_R8_F5_MENTALUNSPE	IVW	3	-0.00318326	0.265039	0.990417
finngen_R8_H7_GLAUCOMA	IVW	3	0.00156229	0.14182	0.991211
finngen_R8_L12_CHRONICULCEROFSKIN	IVW	3	-0.00306268	0.30537	0.991998
finngen_R8_N14_VULVOVAGINFINOTH	IVW	3	-0.00444818	0.461185	0.992304
finngen_R8_M13_FIBROBLASTIC	IVW	3	-0.0017993	0.22232	0.993543
finngen_R8_N14_OTHFEMPELINF	IVW	3	0.00226271	0.300663	0.993995
finngen_R8_AB1_OTHER_SPIROCHAETAL	IVW	3	0.00190031	0.271157	0.994408
finngen_R8_E4_GRAVES_OPHT_STRICT	IVW	3	0.00623616	0.908782	0.994525
finngen_R8_F5_BIPO	IVW	3	0.00252372	0.369417	0.994549
finngen_R8_O15_MATERN_CARE_FETAL_ABNORM	IVW	3	-0.00044698	0.187159	0.998094
finngen_R8_N14_CALCUKIDUR	IVW	3	-0.000254856	0.132176	0.998462
finngen_R8_K11_DISTAL_BITE_INCLAVO	IVW	3	0.000905522	0.47922	0.998492
finngen_R8_ST19_FRACT_WRIST_HAND_LEVEL	IVW	3	0.000230454	0.18214	0.99899
finngen_R8_GRAVES_OPHT	IVW	3	0.000974986	0.964801	0.999194
finngen_R8_M13_MCTD	IVW	3	-0.00018758	0.407584	0.999633

## Sheet: CFHR4
Bonferroni correction pval < 3.20E-06 (0.05/1421/11)
CFHR4
Diseases	method	nsnp	b	se	pval
finngen_R8_H7_CHOROIDRETINA	IVW	2	0.182689	0.030765	2.88172e-09
finngen_R8_H7_BLINDANDVISIMPAIRMENT	IVW	3	0.256539	0.0545935	2.61344e-06
finngen_R8_H7_RETINALDISOTH	IVW	3	0.238169	0.0535122	8.55708e-06
finngen_R8_O15_POSTPART_HAEMORRH_ANATOMY	IVW	3	-0.189294	0.043363	1.26928e-05
finngen_R8_H7_MACULADEGEN	IVW	3	0.425929	0.103867	4.11862e-05
finngen_R8_H7_MODVISIMPBINOC	IVW	3	0.452089	0.110354	4.1908e-05
finngen_R8_K11_HERING	IVW	3	0.0554809	0.0141199	8.52012e-05
finngen_R8_C3_OTHER_SKIN_EXALLC	IVW	2	-0.0786824	0.0202927	0.00010559
finngen_R8_WET_AMD	IVW	3	0.776928	0.206691	0.000170669
finngen_R8_MACULA_NAS	IVW	3	0.149954	0.0400846	0.000183328
finngen_R8_G6_CARPTU	IVW	3	-0.0596899	0.0160561	0.000201128
finngen_R8_K11_HERNIA	IVW	3	0.0399429	0.0110445	0.000298548
finngen_R8_G6_NERPLEX	IVW	3	-0.0383779	0.0114708	0.000820718
finngen_R8_C3_BASAL_CELL_CARCINOMA_EXALLC	Wald ratio	1	-0.0692292	0.0208142	0.000880837
finngen_R8_H7_CATARACTSENILE	IVW	3	0.0414091	0.0125566	0.000974452
finngen_R8_C3_BASAL_CELL_CARCINOMA_INCLAVO_EXALLC	Wald ratio	1	-0.0675192	0.020544	0.00101421
finngen_R8_H8_TINNITUS	IVW	3	0.0913854	0.0278724	0.00104284
finngen_R8_F5_SOCPHOB	IVW	3	0.155782	0.0477974	0.00111721
finngen_R8_I9_E_DRONE	IVW	3	0.273309	0.0842845	0.00118404
finngen_R8_K11_DIVERTIC	IVW	3	0.0464197	0.0144601	0.00132644
finngen_R8_G6_FACOTH	IVW	3	-0.261203	0.0814233	0.00133681
finngen_R8_DM_RETINOPATHY_EXMORE	IVW	3	0.0764861	0.0238455	0.00133863
finngen_R8_E4_THYROIDITSUBAC	IVW	3	0.272557	0.0851755	0.00137455
finngen_R8_M13_SOFTTISSUEOTH	IVW	3	-0.038195	0.0121943	0.00173495
finngen_R8_I9_SAH	IVW	3	0.141789	0.0458006	0.00196285
finngen_R8_M13_MENISCUSDERANGEMENTS	IVW	3	-0.0472045	0.0156745	0.00259917
finngen_R8_O15_MATERN_CARE_PELVIC_ABNORM	IVW	3	-0.0750636	0.0250828	0.00276588
finngen_R8_MACULAR_PUCKER	IVW	3	0.125944	0.0424158	0.00298499
finngen_R8_I9_SAHANEUR	IVW	3	0.105653	0.0358538	0.00321104
finngen_R8_CD2_BENIGN_COLORECANI	Wald ratio	1	0.056505	0.0192742	0.00337183
finngen_R8_N14_OTHINFVAGVULV	IVW	3	0.215287	0.0735174	0.00340732
finngen_R8_H7_KERATITISOTH	IVW	3	0.120218	0.0412951	0.00360052
finngen_R8_F5_ANXIETY	IVW	3	0.0543589	0.0189089	0.00404313
finngen_R8_I9_CAVS_OPERATED	IVW	3	0.071984	0.0251317	0.00417971
finngen_R8_O15_POSTPART_HEAMORRH	IVW	3	-0.0745954	0.0262602	0.00450242
finngen_R8_M13_HALLUXVALGUS	IVW	3	0.0576069	0.0203745	0.00469268
finngen_R8_M13_MYALGIA	IVW	3	-0.0798061	0.028453	0.00503417
finngen_R8_H7_GLOBE	IVW	3	0.257283	0.0917459	0.00504259
finngen_R8_H7_RETINASEPAR	IVW	3	-0.194078	0.0693951	0.00516266
finngen_R8_O15_COMPLIC_ABORT_ECTOP_MOLAR	IVW	3	-0.195319	0.0702402	0.00542375
finngen_R8_F5_DEPRESSIO	IVW	3	0.0337282	0.0121971	0.00568782
finngen_R8_BLEEDING	IVW	3	0.0365178	0.013212	0.00570988
finngen_R8_KRA_PSY_MOOD_EXMORE	IVW	3	0.0334214	0.0121368	0.00589234
finngen_R8_G6_HYDROCEPH	IVW	3	0.161165	0.0586487	0.00599655
finngen_R8_J10_PLEUREFFUSION	IVW	3	0.095274	0.0348062	0.00619519
finngen_R8_T2D_WIDE	IVW	3	-0.0357469	0.0133269	0.00731165
finngen_R8_J10_PLEURPLAGUE	IVW	3	0.117816	0.0440084	0.00742555
finngen_R8_H8_VERTIGO	IVW	3	0.0600126	0.022581	0.00786865
finngen_R8_I9_MYOCARD	IVW	3	-0.155356	0.0587658	0.00820166
finngen_R8_CD2_BENIGN_BREAST	IVW	3	0.120788	0.045747	0.00828199
finngen_R8_F5_MOOD	IVW	3	0.0305287	0.0116947	0.00904193
finngen_R8_K11_OESITIS	IVW	3	0.156139	0.0600134	0.00927543
finngen_R8_O15_POSTPART_HEAMORRH_ALLW	IVW	3	-0.0735986	0.0286861	0.0102982
finngen_R8_H7_SCLERACORNEA	IVW	3	0.0432753	0.0170902	0.0113358
finngen_R8_D3_COAGDEF	IVW	3	-0.226031	0.0895529	0.0116029
finngen_R8_N14_URINOTH	IVW	3	0.0288675	0.0114892	0.0119852
finngen_R8_KELA_DIAB_INSUL_EXMORE	IVW	3	-0.0281313	0.0112517	0.012413
finngen_R8_F5_OPIOIDS	IVW	3	0.17131	0.0691998	0.013302
finngen_R8_O15_POSTPART_HEAMORRH_LB	IVW	3	-0.0747357	0.0303661	0.013849
finngen_R8_I9_HEARTFAIL_NS	IVW	3	-0.0301058	0.0122416	0.013921
finngen_R8_I9_PERICAOTH	IVW	3	0.203221	0.0837965	0.0153009
finngen_R8_CD2_BENIGN_OTHERDIGESTIVE	IVW	3	0.0805974	0.0332548	0.0153662
finngen_R8_F5_MENTORG	Wald ratio	1	0.116896	0.0485578	0.0160682
finngen_R8_D3_ALLERGPURPURA	IVW	3	-0.185905	0.0777963	0.0168649
finngen_R8_K11_CHRONGASTR	IVW	3	0.0583889	0.0244509	0.01694
finngen_R8_AB1_ANOGENITAL_HERPES_SIMPLEX	IVW	3	0.153481	0.0644365	0.0172239
finngen_R8_K11_ATTRITION	IVW	3	-0.191582	0.080438	0.0172315
finngen_R8_G6_HCNP	IVW	3	0.20049	0.0845291	0.0176993
finngen_R8_AB1_BACT_INTEST_OTH	IVW	2	0.0790536	0.033465	0.018163
finngen_R8_J10_TONSILLECTOMY	IVW	3	-0.0355132	0.0151624	0.019171
finngen_R8_C3_SKIN_EXALLC	IVW	3	-0.0624507	0.026924	0.0203669
finngen_R8_O15_AMNIOT_OTHER	IVW	3	-0.0861675	0.0372336	0.0206546
finngen_R8_D3_COAGOTHER	IVW	3	-0.122342	0.0531294	0.0212946
finngen_R8_PRIM_KNEEARTHROSIS	IVW	3	-0.0428854	0.0186758	0.0216586
finngen_R8_DENTAL_TMD	IVW	3	-0.0536103	0.0233575	0.0217215
finngen_R8_J10_PLEURA	IVW	3	0.0441741	0.0192787	0.0219433
finngen_R8_F5_PHOBANX	IVW	3	0.082435	0.0360042	0.0220448
finngen_R8_H8_BPV	IVW	3	0.0683455	0.0299808	0.0226289
finngen_R8_CD2_BENIGN_RECTUM_ANAL	IVW	2	0.0751535	0.0330592	0.023008
finngen_R8_K11_IMPACTED_TEETH_INCLAVO	IVW	3	-0.0747978	0.0329968	0.0234013
finngen_R8_N14_OTHFEMPELINF	IVW	3	-0.0732406	0.0325866	0.0246036
finngen_R8_N14_CYSTITIS	IVW	3	0.0405369	0.0180831	0.024981
finngen_R8_AB1_VIRAL_MENINGITIS	IVW	3	0.161367	0.0722295	0.0254776
finngen_R8_I9_CARDARR	IVW	3	-0.111625	0.0499906	0.0255549
finngen_R8_N14_CERVICAL_HSIL	IVW	3	0.0715581	0.0321245	0.0259124
finngen_R8_E4_SHORT	IVW	3	0.216724	0.0973112	0.0259389
finngen_R8_H7_CATARACTOTHER	IVW	3	0.0503142	0.0227178	0.0267777
finngen_R8_E4_GOITREDIFF	IVW	3	0.174415	0.079237	0.027723
finngen_R8_H8_NOISEINNER	IVW	3	-0.157604	0.0716044	0.0277337
finngen_R8_C_STROKE	IVW	3	0.0302994	0.0138275	0.0284341
finngen_R8_CD2_BENIGN_OVARY	IVW	3	-0.0695619	0.0318111	0.0287631
finngen_R8_Q17_CONGEN_MALFO_GENITAL_ORGANS	IVW	3	-0.0951206	0.0435406	0.0289152
finngen_R8_CD2_BENIGN_BRAIN_CNS	IVW	3	-0.120656	0.0553244	0.0291915
finngen_R8_DM_POLYNEURO	IVW	3	-0.155638	0.0716074	0.0297436
finngen_R8_I9_INTRACRA	IVW	3	0.0998281	0.0459861	0.0299438
finngen_R8_K11_EROSION_INCLAVO	IVW	3	0.0938492	0.0441082	0.0333615
finngen_R8_I9_PHLETHROMBDVTLOW	IVW	3	-0.0521559	0.0246133	0.0340896
finngen_R8_CD2_BENIGN_RECTUM	IVW	2	0.075953	0.0358649	0.0341959
finngen_R8_F5_OTHERSUB	IVW	3	0.103647	0.0489857	0.0343562
finngen_R8_F5_PARAPER	IVW	3	0.202043	0.096721	0.036714
finngen_R8_H7_EYEOTH	IVW	3	-0.0768606	0.0368938	0.0372246
finngen_R8_H7_CORNEALOTH	IVW	3	0.0969092	0.0466765	0.0378767
finngen_R8_M13_LIMBPAIN	IVW	3	-0.029617	0.014315	0.0385519
finngen_R8_C_DIFFICILE_ENTEROCOLITIS	IVW	3	0.108375	0.0527974	0.0401064
finngen_R8_O15_EXCESS_VOMIT_PREG	IVW	3	-0.0978629	0.0479266	0.0411581
finngen_R8_H7_LIDLACRIMALORBIT	IVW	3	0.0278312	0.0136386	0.0412878
finngen_R8_H7_LACRIMALSYSTEM	IVW	3	0.0513231	0.0252203	0.0418516
finngen_R8_C3_THYROID_GLAND_EXALLC	IVW	3	-0.113248	0.0558333	0.0425267
finngen_R8_DM_MACULOPATHY_EXMORE	IVW	3	-0.0800912	0.0395343	0.0427786
finngen_R8_H8_NONSUPPNAS	IVW	3	-0.0524493	0.0260553	0.044115
finngen_R8_H7_RETINAVASC	IVW	3	0.0797076	0.0398641	0.0455562
finngen_R8_E4_DM2NASCOMP	IVW	3	-0.0346658	0.0173403	0.0455929
finngen_R8_D3_COAGDEF_PURPUR_HAEMORRHAGIC	IVW	3	-0.0611105	0.0306631	0.0462654
finngen_R8_AB1_HERPES_SIMPLEX	IVW	3	0.0801289	0.0403104	0.0468339
finngen_R8_N14_VULVOVAGINFINOTH	IVW	3	0.125903	0.0633647	0.0469272
finngen_R8_AB1_OTHER_BACTERIAL	IVW	3	0.0235723	0.0118735	0.047112
finngen_R8_Q17_CONGEN_MALFO_GREAT_ARTERIES	IVW	3	0.188821	0.0954979	0.048016
finngen_R8_H8_VESTIFUNCNAS	IVW	3	0.155943	0.0788862	0.0480632
finngen_R8_O15_POOR_FETGRO	IVW	3	0.0783818	0.0398754	0.0493371
finngen_R8_H8_EXTDISNAS	IVW	3	0.15786	0.0804337	0.0496909
finngen_R8_M13_NEURALGIA	IVW	3	-0.121251	0.0618713	0.0500271
finngen_R8_ST19_FRACT_SKULL_FACIAL_BONES	IVW	3	0.0553273	0.0282475	0.0501525
finngen_R8_ST19_FRACT_WRIST_HAND_LEVEL	IVW	3	0.0433997	0.0221854	0.050439
finngen_R8_FG_CEREBVASC	IVW	3	0.0341435	0.0174749	0.050718
finngen_R8_H8_CHRON_SUPOTITIS	IVW	3	-0.0971336	0.0499377	0.0517632
finngen_R8_I9_HEARTFAIL_AND_CHD	IVW	3	-0.0441336	0.0227104	0.0519776
finngen_R8_ST19_FRACT_RIBS_STERNUM_THORACIC_SPINE	IVW	3	0.0482542	0.0249068	0.0526976
finngen_R8_E4_DM2PERIPH	IVW	3	-0.0961215	0.0497411	0.0533056
finngen_R8_N14_ENDOMET_INFERT	IVW	3	-0.0797142	0.041345	0.0538521
finngen_R8_COPD_MODE	IVW	3	0.039343	0.0204428	0.0542872
finngen_R8_F5_DELIRIUM	IVW	3	0.0824487	0.0429599	0.054959
finngen_R8_N14_FEMALE_GENITAL_HSIL	IVW	3	0.0586836	0.0306395	0.0554554
finngen_R8_I9_HEARTFAIL_EXMORE	IVW	3	-0.0347625	0.0182601	0.0569436
finngen_R8_PRIM_COXARTHROSIS	IVW	3	0.0487674	0.0256346	0.0571181
finngen_R8_N14_VULVAL_DYSPLASIA_ALL	IVW	3	-0.132329	0.0696266	0.0573599
finngen_R8_M13_SPININSTAB	IVW	3	-0.159418	0.0840425	0.0578452
finngen_R8_E4_OBESITY	IVW	3	-0.0316332	0.0166795	0.0578895
finngen_R8_E4_DM2OPTH	IVW	3	-0.0699125	0.0369628	0.0585672
finngen_R8_ANTIDEPRESSANTS	IVW	3	0.0219931	0.0116305	0.0586266
finngen_R8_I9_HYPTENSHD	IVW	3	-0.0506333	0.0268099	0.0589449
finngen_R8_ST19_TOXIC_EFFECT_ETHAN	IVW	3	0.12342	0.0653675	0.0590125
finngen_R8_H7_CHALAZION	IVW	3	-0.0746221	0.0397238	0.0603096
finngen_R8_KRA_PSY_BEHAV_EXMORE	IVW	3	-0.238583	0.12705	0.0603999
finngen_R8_RX_PARACETAMOL_NSAID	IVW	3	-0.0187147	0.00996948	0.0604904
finngen_R8_M13_ARTHROSIS_INCLAVO	IVW	3	-0.0174597	0.00930743	0.0606709
finngen_R8_CHIRHEP_NAS	IVW	3	-0.129498	0.069147	0.0610977
finngen_R8_H7_GLAUCOMA	IVW	3	0.0387069	0.0207049	0.0615599
finngen_R8_H7_PARASTRA6	IVW	3	0.154437	0.0827744	0.0620753
finngen_R8_ABDOM_HERNIA	IVW	3	0.0356265	0.0191158	0.0623606
finngen_R8_I9_HEARTFAIL_ALLCAUSE	IVW	3	-0.0337969	0.0182334	0.0638005
finngen_R8_F5_ALLANXIOUS	IVW	3	0.0331615	0.0179263	0.0643309
finngen_R8_H8_EUSTSALP	IVW	3	0.0870053	0.0470448	0.0643982
finngen_R8_H8_MIDDLEMASTOID	IVW	3	-0.028565	0.015466	0.0647537
finngen_R8_M13_KNEEDERANGEMENTS	IVW	3	-0.0244079	0.0132244	0.06494
finngen_R8_E4_DM2NEU	IVW	3	-0.165226	0.0895881	0.065141
finngen_R8_CD2_BENIGN_STOMACH	IVW	3	0.0831935	0.0451741	0.0655309
finngen_R8_AB1_SEQULAE_INF_NOS	IVW	3	-0.103653	0.0565404	0.0667637
finngen_R8_I9_SEQULAE	IVW	3	0.0417903	0.0229296	0.0683715
finngen_R8_G6_MYONEU	IVW	3	0.0722161	0.0396589	0.0686177
finngen_R8_J10_PERITONSABSC	IVW	3	-0.0492063	0.0270251	0.0686432
finngen_R8_L12_PILONIDALCYST	IVW	3	-0.0810177	0.0445554	0.0690089
finngen_R8_H7_OCUPAIN	IVW	3	-0.0930031	0.051287	0.0697723
finngen_R8_CHILDHOOD_ALLERGY	IVW	3	0.0621863	0.0343009	0.0698374
finngen_R8_AB1_VIRAAL_CONJUNCT	IVW	3	0.182444	0.100859	0.070465
finngen_R8_H8_PERIPHVERTIGO	IVW	3	0.0839282	0.0464109	0.0705488
finngen_R8_F5_EMOPER	IVW	3	0.0753281	0.0416678	0.0706333
finngen_R8_O15_FALSE_LAB	IVW	3	-0.0377407	0.0209759	0.0719807
finngen_R8_H7_RETIVASCOCCLUSION	IVW	3	0.0724277	0.0404728	0.0735278
finngen_R8_D3_SARCOIDOSIS	IVW	3	-0.0650781	0.0364756	0.0743984
finngen_R8_O15_PLAC_PREMAT_SEPAR	IVW	3	-0.165059	0.0931406	0.0763699
finngen_R8_I9_OTHINTRACRA	IVW	3	0.15033	0.0848451	0.0764258
finngen_R8_H7_RETINALDETACH	IVW	3	0.0394544	0.0223286	0.0772294
finngen_R8_M13_REACTARTH	IVW	3	0.0764933	0.0433952	0.0779487
finngen_R8_M13_ARTHINOTH	IVW	3	-0.125738	0.0713795	0.0781463
finngen_R8_L12_URTICARIA	IVW	3	0.0408594	0.023248	0.0788247
finngen_R8_O15_LABOUR_MALPOS	IVW	3	-0.0481567	0.0275815	0.0808146
finngen_R8_J10_COPD	IVW	3	0.0338715	0.0195057	0.0824766
finngen_R8_E4_ENDOMETPOSTOP	IVW	3	-0.0956777	0.0551809	0.0829375
finngen_R8_D3_ANAEMIA_IRONDEF	IVW	3	0.0354305	0.0204435	0.0830783
finngen_R8_J10_UPPERDIS	IVW	3	-0.0151392	0.00873844	0.0831874
finngen_R8_CD2_BENIGN_CHOROID	IVW	3	0.112182	0.0648031	0.0834297
finngen_R8_AB1_SEQULAE_TUBERCU	IVW	3	0.166306	0.0960787	0.0834625
finngen_R8_H7_CONJUNCTDEGDEPOT	IVW	3	0.168488	0.0975038	0.0839858
finngen_R8_DM_PERIPH_ANGIOPATHY	IVW	3	-0.0818389	0.0475953	0.085528
finngen_R8_O15_LABOUR_PELVIC_ABNORM	IVW	3	-0.0616692	0.0359019	0.0858488
finngen_R8_H7_GLAUCSUSP	IVW	3	0.0421165	0.0245672	0.086467
finngen_R8_F5_DELUSIO	IVW	3	-0.111067	0.0649836	0.0874209
finngen_R8_J10_PNEUMONISOLLIQ	IVW	3	-0.0815701	0.0480892	0.0898436
finngen_R8_N14_PHIMOSIS	IVW	2	0.0517994	0.0305546	0.0900174
finngen_R8_D3_ANAEMIA_IRONDEF_NAS	IVW	3	0.0400363	0.0236278	0.0901778
finngen_R8_I9_THROMBOTH	IVW	3	-0.0850722	0.0503234	0.09093
finngen_R8_CD2_LYMPHOID_LEUKAEMIA_EXALLC	IVW	3	0.102021	0.060456	0.0915026
finngen_R8_G6_MS	IVW	3	-0.0839189	0.0499462	0.0929211
finngen_R8_CD2_BENIGN_CRANIAL_NERVE	IVW	3	-0.195456	0.116506	0.0934151
finngen_R8_KRA_PSY_ANYMENTAL	IVW	3	0.0148433	0.00887614	0.0944714
finngen_R8_PD2ND_EXMORE	IVW	3	-0.165943	0.0993899	0.0949954
finngen_R8_ABDOM_HERNIA_POSTOP	IVW	3	0.0520946	0.031231	0.0953079
finngen_R8_J10_CHRONLARYNGITIS	IVW	3	-0.0588594	0.0355298	0.0975969
finngen_R8_J10_EMPHYSEMA	IVW	3	0.114529	0.0691519	0.0976817
finngen_R8_K11_OTHINT	IVW	3	0.0700135	0.0423611	0.0983759
finngen_R8_M13_EARLY_LUMBAR_PROLAPSE	IVW	3	-0.0422945	0.0257048	0.099889
finngen_R8_L12_ALLERGICCONTACT	IVW	3	-0.0601981	0.0367234	0.101165
finngen_R8_J10_NECROTIC	IVW	3	-0.0994035	0.0606989	0.101495
finngen_R8_N14_FEMALE_GENITAL_LSIL	IVW	3	-0.0740357	0.0452762	0.102007
finngen_R8_O15_POLYHYDR	IVW	3	-0.109936	0.0673199	0.102462
finngen_R8_K11_GULC	IVW	3	0.0494963	0.0303764	0.103221
finngen_R8_M13_SPONDYLOPATHYNAS	IVW	3	-0.168628	0.103532	0.103366
finngen_R8_I9_HYPTENS	IVW	3	-0.0151538	0.0093103	0.103601
finngen_R8_HERING_UNILATERAL	IVW	3	0.140593	0.0863852	0.103629
finngen_R8_H7_GLAUCOMA_XFG	IVW	3	0.110094	0.0676976	0.103893
finngen_R8_KRA_PSY_EATING_EXMORE	IVW	2	0.0810301	0.0498447	0.104024
finngen_R8_AB1_MUMPS	IVW	3	-0.135472	0.0834503	0.104507
finngen_R8_K11_GASTRODUOULC	IVW	3	0.0398488	0.0245471	0.104512
finngen_R8_K11_CROWDI_TEETH_INCLAVO	IVW	3	-0.0787101	0.0485741	0.105143
finngen_R8_H7_ASTIGMATISM	IVW	3	0.122228	0.0756063	0.105956
finngen_R8_SMOKING	IVW	3	-0.0680176	0.0421241	0.106377
finngen_R8_K11_OTHDISOES	IVW	3	0.0737836	0.0457298	0.106643
finngen_R8_C3_MELANOMA_EXALLC	IVW	3	-0.0724437	0.0449384	0.106948
finngen_R8_H7_OCUMUSCLE	IVW	3	0.0304025	0.018893	0.107573
finngen_R8_G6_STATUSEPI	IVW	3	0.115457	0.0717694	0.107678
finngen_R8_H7_STRABOTH	IVW	3	0.0441541	0.0274471	0.107681
finngen_R8_M13_FIBROMYALGIA	IVW	3	-0.0798767	0.0497452	0.108336
finngen_R8_F5_PERSMOOD	IVW	3	0.0454313	0.028311	0.108556
finngen_R8_H7_IRIDOCYCLITIS	IVW	3	0.0442391	0.0275782	0.108685
finngen_R8_H7_PERIPHRETINADEGEN	IVW	3	0.18093	0.112814	0.10876
finngen_R8_M13_GOUT	IVW	3	0.0420093	0.0263031	0.110238
finngen_R8_O15_DELIV_CAESAR	IVW	2	-0.038462	0.0240982	0.110477
finngen_R8_I9_VTE	IVW	3	-0.027369	0.0172134	0.11184
finngen_R8_I9_ICH	Wald ratio	1	0.0690675	0.0435979	0.11315
finngen_R8_AB1_VIRAL_SKIN_MUCOUS_MEMBRANE	IVW	3	0.0352545	0.0223009	0.113911
finngen_R8_T2D	IVW	3	-0.0262672	0.0166415	0.114471
finngen_R8_J10_LARYNGITIS	IVW	3	-0.0575077	0.0364448	0.114579
finngen_R8_K11_VENTHER	IVW	3	0.0423252	0.0268262	0.114622
finngen_R8_G6_ROOTPLEXOTHUNS	IVW	3	-0.0583511	0.0370557	0.115329
finngen_R8_J10_PNEUMOPNEUMO	IVW	3	0.102636	0.0653742	0.116421
finngen_R8_M13_SJOGREN	IVW	3	0.0723816	0.0461195	0.116547
finngen_R8_N14_INFCERVIX	IVW	3	0.083699	0.0535718	0.118201
finngen_R8_L12_LICHENSCLERATROPH	IVW	3	-0.0758023	0.0490295	0.122091
finngen_R8_F5_GAD	IVW	3	0.0595473	0.0385547	0.12247
finngen_R8_ALCODELIRIUM	IVW	3	0.0775374	0.0503438	0.123522
finngen_R8_Z21_TOBAC_USE	IVW	3	-0.100301	0.0654795	0.125572
finngen_R8_C3_COLORECTAL_EXALLC	IVW	3	0.0593183	0.0389581	0.127855
finngen_R8_SLE_FG	IVW	3	0.114502	0.0752573	0.128142
finngen_R8_G6_MEDLEOTH	IVW	3	-0.133507	0.0879296	0.128929
finngen_R8_M13_SOFTTISSUE	IVW	3	-0.0129787	0.00856881	0.129862
finngen_R8_M13_SPINSTENOSIS	IVW	3	-0.0270326	0.0178712	0.130372
finngen_R8_J10_BRONCHNAS	IVW	3	-0.120209	0.0795409	0.130715
finngen_R8_K11_OTHDISDIG	IVW	3	0.0347539	0.0230064	0.130885
finngen_R8_O15_PREECLAMPS	IVW	3	-0.0518942	0.034354	0.130897
finngen_R8_I9_HEARTFAIL_AND_ANTIHYPERT	IVW	3	-0.0291262	0.0193897	0.13306
finngen_R8_I9_AORTDIS	IVW	3	0.115696	0.0771297	0.13361
finngen_R8_E4_ENDODIS	IVW	3	0.0875198	0.0584524	0.13432
finngen_R8_O15_ICP_EXMORE	IVW	3	-0.0789234	0.0528009	0.134983
finngen_R8_O15_MATERN_CARE	IVW	3	-0.0199137	0.0133254	0.135067
finngen_R8_L12_INFECT_SKIN_OTHER	IVW	3	0.0666271	0.0446045	0.135246
finngen_R8_I9_HYPTENSESS	IVW	3	-0.0148795	0.00996337	0.135327
finngen_R8_M13_DEFORMACQ	IVW	3	0.0976214	0.0654336	0.135722
finngen_R8_C3_MELANOMA_SKIN_EXALLC	IVW	3	-0.0648887	0.0435423	0.13616
finngen_R8_I9_CARDMYO	IVW	3	-0.047476	0.0319382	0.137148
finngen_R8_CD2_BENIGN_MELANOCYTIC_SCALPNECK	IVW	3	0.14156	0.0954894	0.138215
finngen_R8_L12_URTICA_NAS	IVW	3	0.0431854	0.029157	0.138572
finngen_R8_K11_ANOMALI_DENTAL_ARCH_RELATIONS1_INCLAVO	IVW	3	-0.0450416	0.0304427	0.138993
finngen_R8_DM_NEOVASCULAR_GLAUCOMA	IVW	3	0.125425	0.0848085	0.139161
finngen_R8_C3_RESPIRATORY_INTRATHORACIC_EXALLC	IVW	3	0.0436308	0.0295129	0.139309
finngen_R8_Q17_CONGEN_MALFO_DEFORMAT_MUSCULOS_SYSTEM	IVW	3	0.082251	0.0556768	0.139597
finngen_R8_E4_HYPERPRO	IVW	3	-0.105719	0.0716678	0.14018
finngen_R8_I9_PERICARD	IVW	3	0.109123	0.0740674	0.140672
finngen_R8_L12_ATROPHICSKIN	IVW	3	-0.068545	0.0465775	0.14112
finngen_R8_Q17_LVOTO_BROAD	IVW	3	0.0630794	0.0428872	0.141339
finngen_R8_M13_OSTEOPOROSIS	IVW	3	0.041001	0.0279539	0.142448
finngen_R8_K11_CHOLECYSTECTOMY	IVW	3	0.0265324	0.0180962	0.142598
finngen_R8_K11_PULPITIS_3	IVW	3	-0.0607987	0.0414794	0.142715
finngen_R8_M13_SACROCOGG	IVW	3	-0.113102	0.0772157	0.142986
finngen_R8_E4_OBESITYCAL	IVW	3	-0.0287333	0.019665	0.143978
finngen_R8_C3_ENDOCRINE_EXALLC	IVW	3	-0.10464	0.0716501	0.14417
finngen_R8_M13_ENTEROARTHR	IVW	3	-0.134866	0.0923888	0.144354
finngen_R8_N14_BREASTDISOTH	IVW	3	0.0596101	0.0408555	0.144553
finngen_R8_O15_PREG_MATERN_CARE	IVW	3	-0.0417581	0.0287816	0.146818
finngen_R8_CD2_BENIGN_BONE_CARTILAGE	IVW	3	-0.0695813	0.0480917	0.14794
finngen_R8_K11_APPENDOTH	IVW	3	-0.0660179	0.0456418	0.148055
finngen_R8_L12_ERYTHEMATOUSOTH	IVW	3	0.11346	0.078456	0.148133
finngen_R8_H8_PERFORATION	IVW	3	-0.0724836	0.0501599	0.148443
finngen_R8_K11_FIBROCHIRLIV	IVW	3	-0.0784814	0.0543964	0.149086
finngen_R8_M13_SOFTTISSUENAS	IVW	3	-0.0877019	0.0608462	0.14948
finngen_R8_VIT_DEF	IVW	3	0.0916709	0.063608	0.149532
finngen_R8_M13_SPONDYLOPATHY	IVW	3	-0.018626	0.0129342	0.14985
finngen_R8_F5_ALCOHOL_DEPENDENCE	IVW	3	0.0341839	0.0237454	0.14998
finngen_R8_O15_PUERP_COMPL_NAS	IVW	3	-0.102479	0.0713453	0.150894
finngen_R8_O15_POSTPART_DEPR	IVW	3	0.0425886	0.0296942	0.151503
finngen_R8_AB1_VIRAL_CNS	IVW	3	0.0909813	0.0636327	0.152777
finngen_R8_E4_DM1KETO	IVW	3	0.0726233	0.0508155	0.15296
finngen_R8_O15_HYPTENSPREG	IVW	3	-0.0294689	0.0206513	0.153586
finngen_R8_N14_ORHCEPINDIDYMITIS	IVW	3	0.0648477	0.045536	0.154419
finngen_R8_O15_PRE_OR_ECLAMPSIA	IVW	3	-0.0394806	0.0278088	0.15569
finngen_R8_I9_OTHILLHEART	IVW	3	-0.0915179	0.0645022	0.155948
finngen_R8_COPD_EARLY	IVW	3	0.039048	0.0276244	0.157499
finngen_R8_H7_CORNEALDEFORM	IVW	3	0.139791	0.0989867	0.157887
finngen_R8_G6_SCIALE	IVW	3	-0.0863965	0.0613129	0.158803
finngen_R8_D3_ITP	IVW	3	0.115706	0.0821179	0.158828
finngen_R8_G6_MONOOTHUNS	IVW	3	-0.110359	0.0783431	0.158935
finngen_R8_M13_ACHILLESTEND	IVW	3	0.0584418	0.0415455	0.159518
finngen_R8_AUD_SWEDISH	IVW	3	0.0228247	0.0162288	0.159596
finngen_R8_OFFICIAL_TILASTOKESKUS_DEATH	IVW	3	0.0705433	0.0501715	0.159712
finngen_R8_I9_NONRHEVALV	IVW	3	0.024776	0.0176294	0.15991
finngen_R8_H8_MED_SUPP	IVW	3	-0.03525	0.0251026	0.160249
finngen_R8_H7_CONJUNCTIVITIS	IVW	3	0.0200438	0.0142925	0.160796
finngen_R8_K11_APPENDACUT	IVW	3	0.019773	0.0141055	0.160976
finngen_R8_TRAUMBRAIN_NONCONCUS	IVW	3	0.0520442	0.0371844	0.161626
finngen_R8_E4_HYPERCHOL	IVW	3	-0.0260619	0.0186241	0.161704
finngen_R8_N14_HYPERTROPHYBREAST	IVW	3	-0.0454102	0.0324758	0.16203
finngen_R8_K11_CHOLELITH	IVW	3	0.0180899	0.0129483	0.162388
finngen_R8_M13_PSORIARTH	IVW	2	0.0616444	0.0442075	0.163187
finngen_R8_H8_MENIERE	IVW	3	0.060964	0.0437826	0.163794
finngen_R8_M13_MONOARTHRITIS	IVW	3	-0.0890796	0.0640439	0.164251
finngen_R8_M13_BAKERCYST	IVW	3	0.0719371	0.0518131	0.165017
finngen_R8_Q17_CONGEN_MALFO_OVARIES_FALLOP_TUBES_BROAD_LIGAM	IVW	3	-0.0801179	0.0577801	0.165563
finngen_R8_C3_DIGESTIVE_ORGANS_EXALLC	IVW	3	0.0316888	0.0229316	0.167007
finngen_R8_KRA_PSY_ANXIETY_EXMORE	IVW	3	0.0180882	0.0131362	0.16852
finngen_R8_M13_BONEDENSOTH	IVW	3	-0.122644	0.0891008	0.168678
finngen_R8_H7_CONJUNCTIVITISACUNONATOPIC	IVW	3	0.0342521	0.0248968	0.168895
finngen_R8_N14_SALPHOOPH	IVW	3	-0.0423941	0.0308368	0.169198
finngen_R8_K11_STOMATITIS	IVW	3	0.0645384	0.0470684	0.170324
finngen_R8_AB1_VIRAL_SKIN_NOS	IVW	3	0.0982666	0.0717023	0.170537
finngen_R8_M13_PYOGARTH	IVW	3	-0.070431	0.0514079	0.170674
finngen_R8_AB1_RUBELLA	IVW	3	0.102175	0.0745841	0.170708
finngen_R8_DRUGADVERS_NEUTROPENIA	IVW	3	-0.0706041	0.0515519	0.17082
finngen_R8_K11_OESSTODUO	IVW	3	0.0145979	0.0106677	0.171179
finngen_R8_K11_EMBIMPACT_TEETH_INCLAVO	IVW	3	-0.0368963	0.0269884	0.171588
finngen_R8_K11_MN_RETRGN	IVW	3	-0.0771642	0.0565327	0.172269
finngen_R8_J10_EXTERLUNG	IVW	3	-0.0480228	0.0352865	0.173533
finngen_R8_CD2_BENIGN_SMALL_INTESTINE	IVW	3	0.097946	0.0720545	0.174041
finngen_R8_K11_APPENDECTOMY	IVW	3	0.0201005	0.0147926	0.174203
finngen_R8_CD2_BENIGN_UTERUS_OTH	IVW	3	-0.0898122	0.0661106	0.1743
finngen_R8_O15_RETAINED_PLAC_MEMB_NO_HEAMORRH	IVW	3	-0.0686175	0.0505258	0.174441
finngen_R8_E4_HYPERKALAEMIA	IVW	3	0.086225	0.0636468	0.1755
finngen_R8_FE_STRICT	IVW	3	-0.0404803	0.029881	0.175508
finngen_R8_N14_VULVAL_LSIL	IVW	3	-0.126755	0.0938139	0.176653
finngen_R8_I9_VASCINT	IVW	3	0.100582	0.0745271	0.177144
finngen_R8_E4_DM1REN	IVW	3	-0.0777954	0.0578286	0.178536
finngen_R8_J10_INFLUPNEU	IVW	3	0.0138246	0.0102815	0.17875
finngen_R8_L12_ERYTHEMAMULTIF	IVW	3	0.125079	0.0932307	0.179724
finngen_R8_PAIN	IVW	3	-0.0101797	0.00759594	0.180197
finngen_R8_H7_HETEROPHORIA	IVW	2	0.0694538	0.0519175	0.180971
finngen_R8_F5_ALCOHOLAC	IVW	3	0.0331124	0.0247767	0.181407
finngen_R8_K11_OTHINFLIV	IVW	3	-0.0718816	0.0539451	0.182697
finngen_R8_H7_VISFIELDDEF	IVW	3	-0.0639475	0.0480531	0.183266
finngen_R8_K11_UMBHER	IVW	3	0.0502817	0.0378024	0.183479
finngen_R8_ILD_INSUFFICIENCY	IVW	3	-0.113147	0.0854066	0.185237
finngen_R8_N14_BARTHOCYS	IVW	3	0.105615	0.0799891	0.186712
finngen_R8_AB1_SEXUAL_TRANSMISSION_NOS	IVW	3	0.0596072	0.0452052	0.187305
finngen_R8_F5_ADHD	IVW	3	-0.0754053	0.0571898	0.187333
finngen_R8_CD2_BENIGN_FEMALE_GEN_OTH	IVW	3	0.0898673	0.0682085	0.187659
finngen_R8_M13_FOREIGNBODY	IVW	3	-0.0831439	0.0634007	0.189722
finngen_R8_R18_RETEN_URINE	IVW	3	0.0293066	0.0223625	0.19002
finngen_R8_CD2_BENIGN_LIPOMATOUS	IVW	3	0.0314779	0.0240345	0.190299
finngen_R8_I9_STR_EMBOLIC	IVW	3	0.0817603	0.0624443	0.190422
finngen_R8_C3_SQUOMOUS_CELL_CARCINOMA_SKIN_EXALLC	IVW	3	-0.0557228	0.042559	0.190431
finngen_R8_N14_CERVICAL_LSIL	IVW	3	-0.0585619	0.0448443	0.191588
finngen_R8_H7_IRIDOCYC_ANTER	IVW	3	0.0378736	0.0290089	0.191694
finngen_R8_M13_ARTHROSIS_KNEE	IVW	3	-0.0164201	0.012595	0.192336
finngen_R8_N14_RENFAIL	IVW	3	0.0265152	0.0203501	0.192592
finngen_R8_RHEUMA_SEROPOS	IVW	3	0.0319703	0.0246292	0.194265
finngen_R8_H8_SUP_ACUTE	IVW	3	-0.0312744	0.0241016	0.194422
finngen_R8_O15_MATERN_CARE_CERVICAL_INCOMPETENCE	IVW	3	-0.0931465	0.0718214	0.19466
finngen_R8_D3_IMMUNEMECHANISM	IVW	3	-0.0387451	0.0298934	0.194938
finngen_R8_D3_OTHERWHITECELL	IVW	3	0.0802351	0.0619242	0.195079
finngen_R8_N14_FEMGENPAIN	IVW	3	-0.0375819	0.029076	0.196171
finngen_R8_E4_OBESITYNAS	IVW	3	-0.0291614	0.0225922	0.196783
finngen_R8_CD2_BENIGN_DESCENDING_COLON	IVW	3	0.0760276	0.0589419	0.197095
finngen_R8_F5_ANAPER	IVW	3	-0.0929783	0.0721653	0.197604
finngen_R8_K11_OPEN_BITE_INCLAVO	IVW	3	-0.113876	0.0884916	0.198146
finngen_R8_K11_MAXIL_MOLAR_FAILED_ERUPT_OBSTRUCTION_TOOTH	IVW	3	-0.0839428	0.0652528	0.198295
finngen_R8_K11_LIVER	IVW	3	-0.0362676	0.0282207	0.198742
finngen_R8_H7_IRIDOACUTE	IVW	3	0.0382198	0.0298534	0.200457
finngen_R8_M13_BONECONTINUITY	IVW	3	0.0599631	0.0468662	0.200737
finngen_R8_PULM_INFECTIONS	IVW	2	0.0114501	0.00897603	0.202086
finngen_R8_GE_MODE	IVW	3	-0.0710762	0.0557619	0.202438
finngen_R8_M13_IMPINGEMENT	IVW	3	-0.0318737	0.025032	0.202905
finngen_R8_H7_STENOLACRI	IVW	3	0.0580605	0.0455997	0.202924
finngen_R8_I9_HYPTENSEC	IVW	3	-0.0587736	0.0462477	0.203784
finngen_R8_CHOLELITH_BROAD	IVW	3	0.0160862	0.0126848	0.204746
finngen_R8_I9_SECONDRIGHT	IVW	2	0.104233	0.0822631	0.20513
finngen_R8_N14_CYSTKID	IVW	3	0.105861	0.0836129	0.205483
finngen_R8_ANOSMIA	IVW	3	-0.108507	0.085819	0.206097
finngen_R8_RHEUMA_SEROPOS_WIDE	IVW	3	0.030695	0.0243426	0.207325
finngen_R8_CD2_BENIGN_LIPO_SKIN_HEADFACENECK	IVW	3	0.0691769	0.0550763	0.209109
finngen_R8_D3_COAGDEFNAS	IVW	3	-0.10988	0.0875059	0.209228
finngen_R8_M13_SOFTOVERUSE	IVW	3	0.032794	0.0261901	0.210514
finngen_R8_E4_HYPERPARA	IVW	3	-0.0391368	0.0312982	0.211136
finngen_R8_O15_PUERP_SEPSIS	IVW	3	0.0465471	0.0372478	0.211424
finngen_R8_SMOKING_DEPEND	IVW	3	-0.0623644	0.0499246	0.211603
finngen_R8_O15_MULTIP_GEST	IVW	3	-0.0618631	0.0496123	0.212423
finngen_R8_F5_MILDRET	IVW	3	0.104353	0.0837335	0.212672
finngen_R8_RHEUMA_SEROPOS_OTH	IVW	3	0.0304911	0.0244736	0.212811
finngen_R8_N14_KIDUROTH	IVW	3	0.0491846	0.0394989	0.213054
finngen_R8_M13_ARTHTROSIS_COX_PRIM_ICD10	IVW	3	0.0314013	0.025233	0.213332
finngen_R8_CD2_BENIGN_UTERUS_NOS	IVW	3	-0.0841744	0.0677866	0.214326
finngen_R8_I9_CONDUCTIO	IVW	3	-0.0302177	0.0243864	0.2153
finngen_R8_E4_HYPERLIPNAS	IVW	3	0.0271065	0.0218799	0.21539
finngen_R8_G6_MYOPOTHUNS	IVW	3	0.0598703	0.0483695	0.215802
finngen_R8_CD2_BENIGN_PITUITARY_CRANIPHAR	IVW	3	-0.0931713	0.0753886	0.216503
finngen_R8_K11_DISTAL_BITE_INCLAVO	IVW	3	-0.125979	0.102004	0.216816
finngen_R8_C3_URINARY_TRACT_EXALLC	IVW	2	-0.0444479	0.0360119	0.217108
finngen_R8_L12_HIDRADENITISSUP	IVW	3	0.0948814	0.076904	0.217291
finngen_R8_C3_RECTUM_ADENO	IVW	3	0.0780593	0.0632768	0.217345
finngen_R8_L12_BULLOUS	IVW	3	-0.0739468	0.0601004	0.218552
finngen_R8_G6_MONONPOTHUS	IVW	3	0.0990541	0.0805742	0.218939
finngen_R8_I9_VARICVE	Wald ratio	1	0.0201115	0.0163953	0.219949
finngen_R8_G6_NEUINFL	IVW	3	0.0713368	0.0581978	0.220288
finngen_R8_M13_SPONTRUPTSYNOTEND	IVW	3	0.0596418	0.0487165	0.220854
finngen_R8_TBC_RESP	IVW	3	0.0662653	0.0541855	0.221354
finngen_R8_L12_IMPETIGO	IVW	3	-0.0850878	0.0696858	0.222078
finngen_R8_E4_DM1PERIPH	IVW	3	-0.108873	0.0893968	0.223278
finngen_R8_N14_URETHRAOTH	IVW	3	0.0167477	0.0137721	0.223961
finngen_R8_J10_PYOTHORAX	IVW	3	-0.0911383	0.0752747	0.225994
finngen_R8_M13_GLUTEALTEND	IVW	3	-0.0998897	0.0826467	0.226803
finngen_R8_N14_FEMGENPROL	IVW	3	0.0294392	0.0244026	0.227665
finngen_R8_E4_DM2COMA	IVW	3	-0.0416112	0.0345265	0.228128
finngen_R8_M13_SCIATICA	IVW	3	-0.0322005	0.0267584	0.22883
finngen_R8_M13_SYSTSLCE	IVW	3	-0.111812	0.0930759	0.229635
finngen_R8_AB1_OTHER_SEPSIS	IVW	3	0.0258427	0.0215263	0.22994
finngen_R8_CD2_BENIGN_HEAMANGIOMA_LYMPHANGIOMA	IVW	3	-0.0563687	0.0470249	0.230645
finngen_R8_ALCOHOL_RELATED	IVW	3	0.0184966	0.0154644	0.231667
finngen_R8_D3_AGRANULOCYTOSIS	IVW	3	-0.0482816	0.040398	0.232028
finngen_R8_I9_AORTVALV_EARLY	IVW	3	0.0536658	0.0449559	0.232578
finngen_R8_I9_VHD	IVW	3	0.0119174	0.0100036	0.233529
finngen_R8_M13_OTHERJOINT	IVW	3	-0.0112922	0.00948403	0.233789
finngen_R8_K11_CHOLECYST	IVW	3	0.0489051	0.0412415	0.235692
finngen_R8_N14_IGA_NEPHROPATHY	IVW	3	0.110985	0.0938519	0.236987
finngen_R8_F5_PSYTRANS	IVW	3	0.0497863	0.042227	0.238391
finngen_R8_KRA_PSY_HYPERKIN_EXMORE	IVW	3	-0.0616742	0.0523314	0.238585
finngen_R8_N14_OTHBLADD	IVW	3	0.0551111	0.0468103	0.239064
finngen_R8_F5_SOMATOFORM	IVW	3	0.0381278	0.0324457	0.239945
finngen_R8_O15_DELIV_PERIN_LACER	IVW	3	-0.040376	0.0344557	0.241268
finngen_R8_M13_ANKYLOSPON	IVW	3	0.0509625	0.0435249	0.241646
finngen_R8_N14_NEUROMUSCDYSBLADD	IVW	3	0.0531646	0.0454066	0.241657
finngen_R8_SLE_STRICT	IVW	3	0.104126	0.0894876	0.244593
finngen_R8_G6_POLYOTHUNS	IVW	3	-0.0484094	0.0417009	0.245694
finngen_R8_GE_STRICT	IVW	3	-0.103126	0.0889177	0.246136
finngen_R8_D3_ANAEMIA_IRONDEF_BLOODLOSS	IVW	3	0.0539684	0.0465678	0.246489
finngen_R8_H7_PARASTRAB	IVW	3	0.0624043	0.0539334	0.247247
finngen_R8_K11_OTHANRECT	IVW	3	0.0478149	0.0414085	0.248208
finngen_R8_O15_TWIN_GEST	IVW	3	-0.0518807	0.0452454	0.251526
finngen_R8_H7_INTERHETEROTRO	IVW	3	0.0657051	0.0573538	0.251956
finngen_R8_CIRRHOSIS_BROAD	IVW	3	-0.0420504	0.0367168	0.252099
finngen_R8_M13_OSTEOCHONDRO	IVW	3	0.0197109	0.0172362	0.252801
finngen_R8_CD2_BENIGN_EYE	IVW	3	0.0660708	0.0578051	0.253042
finngen_R8_M13_ARTHROSIS_OTH	IVW	3	0.0194397	0.0170613	0.254536
finngen_R8_Q17_CONGEN_DEFORMITI_FEET	IVW	3	0.101846	0.0897712	0.256584
finngen_R8_I9_STR_EMBOLIC_WITH_FLIMMER	IVW	3	-0.102993	0.0908565	0.256973
finngen_R8_O15_EXIST_HYPERT_COMPLIC	IVW	3	-0.0790011	0.0697815	0.257584
finngen_R8_DM_NEUROPATHY	IVW	3	-0.0620331	0.0550106	0.259464
finngen_R8_E4_LIPOPROTNAS	IVW	3	0.0412982	0.0366343	0.259612
finngen_R8_M13_JUVOSTEOCHONRHIP	IVW	3	-0.0842098	0.0747576	0.25998
finngen_R8_J10_CHRONTONSADEN	IVW	3	-0.0136969	0.0121698	0.260386
finngen_R8_L12_VASCULITISNAS	IVW	3	0.106421	0.0949032	0.262134
finngen_R8_L12_PRURIGONOD	IVW	3	0.105804	0.0945274	0.263014
finngen_R8_N14_PROSTAOTH	IVW	3	-0.0967724	0.0865687	0.263623
finngen_R8_N14_NEPHRITICNAS	IVW	3	-0.106001	0.0948647	0.263829
finngen_R8_K11_VOLVU	IVW	3	0.0979421	0.0878445	0.264872
finngen_R8_D3_IMMUDEFANTIBODY	IVW	3	-0.104079	0.0933639	0.26495
finngen_R8_ALCO_PRESCRIPTION	IVW	3	0.0501979	0.0450887	0.265574
finngen_R8_G6_SPINOTH	IVW	3	-0.0908728	0.0817118	0.266089
finngen_R8_C3_BREAST_HERPLUS_EXALLC	IVW	3	-0.0288353	0.0259524	0.266532
finngen_R8_ASTHMA_PNEUMONIA	IVW	3	-0.0238156	0.021447	0.26681
finngen_R8_AUD	IVW	3	0.0210225	0.0189906	0.268296
finngen_R8_Q17_LVOTO_NARROW	IVW	3	0.0890087	0.0806254	0.269602
finngen_R8_CD2_BENIGN_ASCENDING_COLON	IVW	3	0.0461838	0.042004	0.271546
finngen_R8_FE_MODE	IVW	3	-0.0710556	0.0646424	0.271676
finngen_R8_D3_SCNDPOLYCYTHAEMIA	IVW	3	0.102878	0.0937632	0.272551
finngen_R8_FG_DOAAC	IVW	3	-0.0222509	0.0202964	0.272948
finngen_R8_E4_DM1COMA	IVW	3	0.0559852	0.0510961	0.273216
finngen_R8_M13_OVERUSENAS	IVW	3	0.0901321	0.0822819	0.273338
finngen_R8_D3_BLOODNAS	IVW	3	0.128044	0.116973	0.273675
finngen_R8_ASTHMA_MIXED_EXMORE	IVW	3	-0.0604972	0.0553171	0.274111
finngen_R8_I9_DVTANDPULM	IVW	3	-0.0200943	0.0183872	0.274464
finngen_R8_K11_ACUTPANC	IVW	3	0.0414903	0.0379761	0.274597
finngen_R8_HERING_BILATERAL	IVW	3	0.0466314	0.0427021	0.274826
finngen_R8_ASTHMA_NAS	IVW	3	-0.0182882	0.0167509	0.274935
finngen_R8_C3_BRONCHUS_LUNG_EXALLC	IVW	3	0.0342859	0.0314853	0.276176
finngen_R8_I9_STR	IVW	3	0.0171093	0.0157254	0.276592
finngen_R8_H7_BLEPHAROCHALASIS	IVW	3	0.0280655	0.0258162	0.276981
finngen_R8_I9_PROGVASC	IVW	3	0.0979224	0.090448	0.278969
finngen_R8_APPENDICITIS_BROAD	IVW	3	0.0147909	0.0136669	0.279145
finngen_R8_F5_SCHIZOAFF	IVW	3	-0.0614149	0.0569121	0.280535
finngen_R8_I9_RHEUVALV	IVW	3	0.119338	0.110695	0.280998
finngen_R8_H7_CORNEALNAS	IVW	3	0.0859519	0.0801149	0.283334
finngen_R8_L12_PRURITUS	IVW	3	0.0464694	0.043326	0.283472
finngen_R8_N14_URETHRALSTRICT	IVW	3	0.0625442	0.0583266	0.283581
finngen_R8_F5_DEPPER	IVW	3	0.0992623	0.0926357	0.28393
finngen_R8_I9_POSTAMI	IVW	3	-0.0466683	0.0436334	0.28482
finngen_R8_AB1_ERYSIPELAS	IVW	3	0.0180542	0.0169194	0.285941
finngen_R8_N14_CHRONKIDNEYDIS	IVW	3	0.0330214	0.0309747	0.28639
finngen_R8_E4_GOITRENAS	IVW	3	0.0507218	0.0477057	0.287681
finngen_R8_L12_LICHENPLANUS	IVW	3	0.0413835	0.0389818	0.288412
finngen_R8_F5_BULIMIA	IVW	3	0.123267	0.116606	0.290455
finngen_R8_H8_EUSTNAS	IVW	3	-0.0937057	0.0887289	0.290927
finngen_R8_E4_PCOS_CONCORTIUM	IVW	3	-0.0149939	0.0142078	0.291274
finngen_R8_O15_PREG_OTHER_MAT_DISORD	IVW	3	-0.0190722	0.0181233	0.292635
finngen_R8_M13_ARTHTROSIS_COX	IVW	3	0.0270256	0.0256818	0.292651
finngen_R8_FE	IVW	3	-0.0298169	0.02846	0.294786
finngen_R8_I9_VARICVESOTH	IVW	3	0.1	0.0955522	0.295308
finngen_R8_VD_U	IVW	2	0.0788329	0.0753452	0.295427
finngen_R8_M13_ENTESOPATHYNAS	IVW	3	-0.0490394	0.0468894	0.29563
finngen_R8_C3_RECTUM_EXALLC	IVW	3	0.0777837	0.0744574	0.296174
finngen_R8_I9_CARDMYOOTH	IVW	3	-0.0486837	0.0467063	0.297255
finngen_R8_I9_IHD	IVW	3	0.0124018	0.0118992	0.2973
finngen_R8_M13_POLYARTHROPATHIES	IVW	3	0.014557	0.013982	0.297819
finngen_R8_CD2_MULTIPLE_MYELOMA_PLASMA_CELL_EXALLC	IVW	3	0.0688116	0.0661526	0.298249
finngen_R8_L12_SCARCONDITIONS	IVW	3	-0.0756315	0.0727639	0.298615
finngen_R8_H7_CORNULCER	IVW	3	0.0329362	0.0317029	0.298849
finngen_R8_PNEUMO_SEPTHICHE	IVW	3	0.0937146	0.0902256	0.298958
finngen_R8_DM_RET_VEIN_OCCLU	IVW	3	-0.0884277	0.0852142	0.299405
finngen_R8_E4_NONTOXIC_THYROID	IVW	3	0.0339781	0.0327508	0.299515
finngen_R8_AB1_VIRAL_WARTS	IVW	3	-0.044695	0.0431094	0.299837
finngen_R8_ASTHMA_INFECTIONS	IVW	3	-0.0167296	0.0161454	0.300118
finngen_R8_L12_LYMPHADENITIS	IVW	3	-0.083222	0.0804126	0.300698
finngen_R8_M13_LOWBACKPAINORANDSCIATICA	IVW	3	-0.0179812	0.0173844	0.300982
finngen_R8_O15_COMPLIC_LAB_DELIV	IVW	3	-0.020481	0.0198093	0.301178
finngen_R8_O15_MATERN_CARE_OTHER	IVW	3	0.0259163	0.0251015	0.301856
finngen_R8_O15_ICP_WIDE_EXMORE	IVW	3	-0.0483047	0.0469549	0.303599
finngen_R8_K11_JAWS	IVW	3	-0.0545345	0.0530136	0.303626
finngen_R8_DM_SEVERAL_COMPLICATIONS	IVW	3	-0.0207378	0.0201675	0.303819
finngen_R8_H7_DIPLOPIA	IVW	3	0.0393744	0.038298	0.303901
finngen_R8_CD2_BENIGN_BONE_LONG_LOWER	IVW	3	-0.0887031	0.0865129	0.305214
finngen_R8_O15_MATERN_CARE_DISPROP	IVW	3	-0.0673353	0.0660058	0.307661
finngen_R8_K11_PANCOTH	IVW	3	-0.0575086	0.0564152	0.308022
finngen_R8_O15_ICP_WIDE	IVW	3	-0.0474678	0.0467006	0.309426
finngen_R8_G6_XTRAPYR	IVW	3	0.0241895	0.0237998	0.30945
finngen_R8_M13_ARTHROSIS_KNEE_PRIM_KNEESURG	IVW	3	-0.0381042	0.0375182	0.309811
finngen_R8_F5_EATOTH	IVW	3	0.124331	0.122737	0.311069
finngen_R8_I9_PULMEMB	IVW	3	0.0248384	0.0245577	0.31181
finngen_R8_AB1_TUBERCULOSIS	IVW	3	0.0565521	0.055986	0.312442
finngen_R8_N14_ENDOMETRIOSIS_PELVICPERITONEUM	IVW	3	-0.0318533	0.0316231	0.313801
finngen_R8_Q17_CONGEN_MALFO_AORTIC_MITRAL_VALVES	IVW	3	0.103467	0.102968	0.314971
finngen_R8_CD2_BENIGN_MELANOCYTIC_LOWERLIMB	IVW	3	0.14453	0.144943	0.318689
finngen_R8_K11_HEPFAIL	IVW	2	-0.0787868	0.0791164	0.319331
finngen_R8_L12_ROSACEANAS	IVW	3	0.0708823	0.071202	0.319488
finngen_R8_H7_DIVERGSTRAB	IVW	3	0.057905	0.0585651	0.322796
finngen_R8_K11_MN_RETRGN_AND_SURG	IVW	3	-0.0899683	0.0910361	0.32302
finngen_R8_F5_DEMENTIA_INCLAVO	IVW	3	-0.0196482	0.0199116	0.323754
finngen_R8_N14_OTHNONINFCERVIX	IVW	3	0.0607678	0.0617813	0.325315
finngen_R8_C3_CORPUS_UTERI_EXALLC	IVW	3	0.0622847	0.0634244	0.326085
finngen_R8_L12_OTHERSKINSUBCUTIS	IVW	3	-0.0154032	0.0157057	0.32672
finngen_R8_K11_FUNCDYSP	IVW	3	0.0286242	0.0292373	0.327565
finngen_R8_L12_DERM_NUMMULAR	IVW	3	0.0492499	0.0504282	0.328751
finngen_R8_KRA_PSY_DEMENTIA_EXMORE	IVW	3	-0.0216013	0.0221427	0.329288
finngen_R8_J10_PNEUMONIA	IVW	3	0.0112398	0.0115398	0.330057
finngen_R8_J10_COLD	IVW	3	-0.0358074	0.0367942	0.330464
finngen_R8_KRA_PSY_SLEEP_NONORG_EXMORE	IVW	3	0.0355947	0.0366075	0.330885
finngen_R8_N14_GLOMER_NEPHRITIS	IVW	3	0.0555346	0.0571467	0.331155
finngen_R8_E4_FLUIDELECTRO	IVW	3	0.0236541	0.0243776	0.331886
finngen_R8_M13_CERVICOBRACHSDR	IVW	3	-0.0301182	0.0310477	0.332015
finngen_R8_K11_CARIES_1_ONLYAVO	IVW	3	0.014195	0.0146354	0.332092
finngen_R8_H7_REFRAACCOMMODIS	IVW	3	0.026472	0.0273217	0.332595
finngen_R8_CD2_BENIGN_KIDNEY	IVW	3	0.0797778	0.0823488	0.332655
finngen_R8_N14_ENDOMETRIOSIS_ASRM_STAGE1_2	IVW	3	-0.0296409	0.0308106	0.336032
finngen_R8_L12_DECUBITANSULCERANDPRESSURE	IVW	3	-0.0584632	0.0608724	0.336843
finngen_R8_M13_SPONDYLINFLAMNAS	IVW	3	-0.0586758	0.0614309	0.339501
finngen_R8_G6_AD_WIDE	IVW	3	-0.0218318	0.0229212	0.340858
finngen_R8_N14_OTHNONINFVAG	IVW	3	0.0459546	0.0482882	0.341263
finngen_R8_E4_DM2KETO	IVW	3	-0.0856599	0.0902701	0.342657
finngen_R8_I9_HEARTFAIL_AND_OVERWEIGHT	IVW	3	-0.023653	0.0250492	0.345036
finngen_R8_K11_ORAL_LICHEN_WIDE_HYPOT_THYRO	IVW	3	-0.0776122	0.0822624	0.34544
finngen_R8_AB1_GASTROENTERITIS_NOS	IVW	3	0.0174208	0.0186811	0.351061
finngen_R8_C3_CANCER_EXALLC	IVW	3	-0.00919377	0.00988932	0.352544
finngen_R8_J10_ASBESTPNEUMOC	IVW	3	0.0867891	0.0934307	0.352933
finngen_R8_K11_DENTOFACIAL_ANOMALIES	IVW	3	-0.0220922	0.0239437	0.356179
finngen_R8_L12_ERYTHEMANODOSUM	IVW	3	0.104032	0.112861	0.356645
finngen_R8_H7_CONJUHAEMOR	IVW	3	0.0500943	0.0543813	0.356963
finngen_R8_DEATH	IVW	3	0.0123095	0.0134031	0.358407
finngen_R8_POLLENALLERG	IVW	3	-0.0277618	0.0302637	0.358969
finngen_R8_CD2_BENIGN_LEIOMYOMA_UTERI	IVW	3	-0.0133169	0.0145266	0.359285
finngen_R8_AB1_STREPTO_SEPSIS	IVW	3	0.0550604	0.0601612	0.36008
finngen_R8_E4_HYPOPARA	Wald ratio	1	0.0791571	0.0867772	0.36167
finngen_R8_I9_PAROXTAC	IVW	3	0.0287944	0.0315736	0.361781
finngen_R8_CD2_BENIGN_LIPO_SKIN_TRUNK	IVW	3	0.0345699	0.0379082	0.361802
finngen_R8_E4_PARATHYRO	IVW	3	-0.0267778	0.0293961	0.362332
finngen_R8_K11_OESOBST	IVW	3	0.113945	0.125291	0.363115
finngen_R8_RX_ANTIHYP	IVW	3	-0.0104272	0.0114698	0.363299
finngen_R8_COPD_OPPORTUNIST_INFECTIONS	IVW	3	-0.0863225	0.0951274	0.364174
finngen_R8_N14_BARTHOOTHNAS	IVW	3	0.0736275	0.0811831	0.364443
finngen_R8_ASTHMA_OPPORTUNIST_INFECTIONS	IVW	3	-0.0632739	0.0699033	0.365379
finngen_R8_O15_POSTPART_HAEMORRH_PLACENTA	IVW	3	-0.0425885	0.0471435	0.366325
finngen_R8_N14_FITUB	IVW	3	-0.0711096	0.0789606	0.367817
finngen_R8_THYROIDITIS	IVW	3	0.049196	0.054731	0.368723
finngen_R8_M13_DORSOPATHYOTH	IVW	3	-0.00932528	0.0103887	0.369377
finngen_R8_GOUT_IDIO	IVW	3	0.0455834	0.0508441	0.369969
finngen_R8_APPENDACUT_NOCOMPLIC	IVW	3	0.018767	0.0209435	0.370212
finngen_R8_H7_ALLERGICCONJUNCTIVITIS	IVW	3	0.0148855	0.0166193	0.370425
finngen_R8_CD2_BENIGN_SIGMOID_COLON	IVW	3	0.0427198	0.0477415	0.370885
finngen_R8_L12_PSORI_PUSTUPALM	IVW	3	0.0624848	0.0700169	0.372166
finngen_R8_K11_PERIODON_CHRON_COMPL	IVW	3	0.0488123	0.0549351	0.374247
finngen_R8_M13_POLYARTHRITIS	IVW	3	0.0670243	0.0756914	0.37589
finngen_R8_E4_THYTOXGOITMULT	IVW	3	-0.0514868	0.0581617	0.37603
finngen_R8_I9_CORATHER	IVW	3	0.0159956	0.018106	0.376998
finngen_R8_H7_RETINALDETACHBREAK	IVW	3	0.0336373	0.0380972	0.377272
finngen_R8_L12_SEBORRKERAT	IVW	3	-0.028209	0.0320342	0.37854
finngen_R8_M13_TRIGGERFINGER	IVW	3	-0.063475	0.0723718	0.38045
finngen_R8_H8_HL_PRESBY	IVW	3	0.0328453	0.0374987	0.381082
finngen_R8_M13_PATELLADISLOCATIO	IVW	2	-0.0530546	0.0606558	0.381746
finngen_R8_M13_ARTHROPATHIES	IVW	3	-0.00703113	0.00804661	0.382227
finngen_R8_M13_FIBROBLASTIC	IVW	3	0.0229891	0.0263853	0.3836
finngen_R8_H7_VISDISTNAS	IVW	3	-0.0460716	0.0529945	0.384648
finngen_R8_N14_CERVICAL_DYSPLASIA_ALL	IVW	3	0.0231329	0.0266482	0.385347
finngen_R8_AB1_BACTINF_NOS	IVW	3	0.0161744	0.0187229	0.387654
finngen_R8_CD2_BENIGN_HEMANGIOMA	IVW	3	-0.0423057	0.0490403	0.388318
finngen_R8_SPONDYLOARTHRITIS	IVW	3	0.0253238	0.0293747	0.388634
finngen_R8_K11_PULPITIS_1_ONLYAVO	IVW	3	-0.010962	0.012745	0.389732
finngen_R8_G6_NEUATR	IVW	3	-0.0595619	0.0693312	0.39029
finngen_R8_J10_PNEUMOBACT	IVW	3	0.0231003	0.0269026	0.390527
finngen_R8_F5_BEHEMOCHILD	IVW	3	-0.0270336	0.0314927	0.390667
finngen_R8_O15_HAEMORRH_EARLY_PREG	IVW	3	-0.0208518	0.0243775	0.392347
finngen_R8_ULCERRECT	IVW	3	-0.0402328	0.0471149	0.393144
finngen_R8_K11_ORALCYST	IVW	3	-0.0794181	0.0933186	0.394746
finngen_R8_C3_DLBCL_EXALLC	IVW	3	0.0662682	0.0780747	0.396004
finngen_R8_HLP_C3_DLBCL	IVW	3	0.0662373	0.0780742	0.396221
finngen_R8_RHEUMA_SEROPOS_STRICT	IVW	3	0.0308805	0.0364573	0.396977
finngen_R8_J10_ASTHMA_EXMORE	IVW	3	-0.0105123	0.0124301	0.39771
finngen_R8_F5_SLEEP_NOS	IVW	3	0.0717981	0.0849209	0.397848
finngen_R8_J10_SINUSITIS	IVW	3	-0.0140313	0.016609	0.398222
finngen_R8_J10_BRONCH	IVW	3	-0.0363342	0.0430653	0.398837
finngen_R8_L12_INFECT_SKIN	IVW	3	-0.0138861	0.0164727	0.399242
finngen_R8_ULCERILEO	IVW	3	-0.0548536	0.0651927	0.400119
finngen_R8_O15_FAILED_INDUCT	IVW	3	-0.0570046	0.0678106	0.400547
finngen_R8_M13_SPONDYLOSIS	IVW	3	-0.0160925	0.0191802	0.401463
finngen_R8_D3_ANAEMIANAS	IVW	3	0.0172363	0.0205773	0.402235
finngen_R8_O15_CONCEPT_ABNORM	IVW	3	-0.018759	0.0223983	0.402301
finngen_R8_D3_PURPURA_AND3_OTHER_HAEMORRHAGIC	IVW	3	-0.0311552	0.0372498	0.402938
finngen_R8_AB1_VARICELLA	IVW	3	0.0655242	0.0784292	0.403461
finngen_R8_N14_OTHNONINFOVA	IVW	3	-0.0698466	0.0836032	0.403462
finngen_R8_N14_HYPERTROPHYBREAST_BOTH	IVW	3	-0.0249161	0.0299011	0.404684
finngen_R8_K11_CARIES_DENTIN	IVW	3	-0.022554	0.0270846	0.405
finngen_R8_O15_PREG_ECTOP	IVW	3	0.0259163	0.0311353	0.405197
finngen_R8_L12_URTICA_DERTMATOG	IVW	3	0.0444339	0.0534576	0.405861
finngen_R8_E4_DMNASNASCOMP	IVW	3	-0.0807863	0.097308	0.406419
finngen_R8_D3_IMMUNEMECHANISMNAS	IVW	3	0.0708807	0.0854252	0.406686
finngen_R8_K11_IBS	IVW	3	-0.0203502	0.0245309	0.406778
finngen_R8_F5_BEHAVE	IVW	3	0.0351645	0.0424053	0.406964
finngen_R8_TONGUEABNORMALITY	IVW	3	0.0487414	0.0587904	0.407065
finngen_R8_CD2_BENIGN_CAECUM	IVW	3	0.0393134	0.0475583	0.408443
finngen_R8_E4_HYPOOSMNAT	IVW	3	0.0273222	0.0331744	0.41017
finngen_R8_G6_SLEEPAPNO_INCLAVO	IVW	3	-0.0117241	0.0142375	0.410242
finngen_R8_K11_DEEP_BITE_INCLAVO	IVW	3	-0.0369028	0.0448334	0.410446
finngen_R8_AUTOIMMUNE_HYPERTHYROIDISM	IVW	3	-0.0761585	0.0926788	0.411221
finngen_R8_M13_TOEDEFORMOTH	IVW	3	0.0683892	0.0835923	0.413284
finngen_R8_G6_SLEEPDISOTH	IVW	3	-0.0335823	0.0410886	0.41375
finngen_R8_KRA_PSY_PERSON_EXMORE	IVW	3	0.0219434	0.0268494	0.41377
finngen_R8_M13_PREPATELLARBURSITIS	IVW	3	-0.0546058	0.0669031	0.41439
finngen_R8_RHEUMA_NOS	IVW	3	-0.030273	0.0371372	0.414977
finngen_R8_N14_MESNRUIRREG	IVW	3	-0.0115095	0.0141627	0.416409
finngen_R8_I9_ANGIO	IVW	3	-0.0172154	0.021194	0.416634
finngen_R8_M13_CALCIFICTEND	IVW	3	0.0467661	0.0576867	0.417543
finngen_R8_GOUT_STRICT	IVW	3	0.0290944	0.0359699	0.418599
finngen_R8_H7_EPISCLERITIS	IVW	3	0.0512754	0.0636349	0.420373
finngen_R8_K11_ALCOLIV	IVW	3	-0.0351032	0.0435792	0.42053
finngen_R8_FG_OTHHEART	IVW	3	0.00828624	0.0102937	0.420829
finngen_R8_ASTHMA_ACUTE_RESPIRATORY_INFECTIONS	IVW	3	-0.015061	0.0187338	0.421427
finngen_R8_AB1_RESP_TUBERCU_NONCONF	IVW	3	0.0503277	0.0628073	0.422955
finngen_R8_D3_ANAEMIA	IVW	3	0.0154597	0.0193025	0.423182
finngen_R8_CD2_BENIGN_TONGUE	IVW	3	-0.0695257	0.0868245	0.42327
finngen_R8_M13_DORSOPATHYNAS	IVW	3	-0.0708514	0.0885024	0.423387
finngen_R8_F5_EMOCHILD	IVW	3	-0.0476686	0.0595745	0.423624
finngen_R8_I9_NONISCHCARDMYOP	IVW	3	-0.0323983	0.0405044	0.423785
finngen_R8_O15_PUERP_INFECT_OTHER	IVW	3	0.0457245	0.0573087	0.42495
finngen_R8_COPD_LATER	IVW	3	0.032859	0.0412348	0.425523
finngen_R8_MUCOPROCT	IVW	3	-0.0292193	0.036669	0.425545
finngen_R8_MACULAR_HOLE	IVW	3	0.0813758	0.102329	0.426475
finngen_R8_CD2_BENIGN_RECTOSIGMOID_JUNC	IVW	3	0.0615502	0.0774095	0.426542
finngen_R8_K11_REIMB_202	IVW	3	0.0134787	0.0169697	0.427034
finngen_R8_O15_PREG_GU_INFECT	IVW	3	0.034108	0.0430407	0.428093
finngen_R8_M13_OSTEONECROSIS	IVW	3	-0.0496205	0.0626459	0.428314
finngen_R8_C3_NSCLC_SQUAM_EXALLC	IVW	3	0.0707059	0.0893812	0.428909
finngen_R8_K11_HYPO_ONLY_INCLAVO	IVW	3	0.0687724	0.0869662	0.429064
finngen_R8_F5_MENTALUNSPE	IVW	2	0.0472436	0.0597435	0.429076
finngen_R8_C3_BREAST_HER2NEG_EXALLC	IVW	3	-0.0164079	0.0207833	0.429834
finngen_R8_Q17_OTHER_CONGEN_MALFO_DIGES_SYSTEM1	IVW	3	-0.0542747	0.0688317	0.430397
finngen_R8_RX_STATIN	IVW	3	-0.00787729	0.00999613	0.430677
finngen_R8_M13_ALGONEURO	IVW	3	0.061563	0.0783415	0.431968
finngen_R8_L12_FOLLICULARCYST	IVW	3	-0.0247583	0.0315917	0.433219
finngen_R8_K11_OTHDIG	IVW	3	0.0146194	0.0186581	0.433311
finngen_R8_M13_CHONDROMALACIA	IVW	3	0.0674671	0.0861612	0.433607
finngen_R8_I9_RHEUFEV	IVW	3	0.0564366	0.0721818	0.434293
finngen_R8_N14_CHRONEPHROPATH	IVW	3	0.0537313	0.068754	0.434508
finngen_R8_I9_K_CARDIAC	IVW	3	-0.0141545	0.0181376	0.435158
finngen_R8_N14_CALCULOWER	IVW	3	-0.0486244	0.0624026	0.435859
finngen_R8_K11_CD_STRICT2	IVW	3	-0.0440127	0.0565787	0.436627
finngen_R8_K11_UC_STRICT2	IVW	3	-0.0263118	0.0338379	0.436814
finngen_R8_M13_MYOSITIS	IVW	3	-0.0682587	0.087841	0.437117
finngen_R8_I9_LYMPHADE	IVW	3	-0.0592145	0.0762916	0.437654
finngen_R8_N14_OTHNONINFUTER	IVW	3	0.0301057	0.0389057	0.439042
finngen_R8_I9_CABG	IVW	3	0.018952	0.0245032	0.439256
finngen_R8_O15_ABORT_SPONTAN	IVW	3	-0.0221144	0.0287215	0.441324
finngen_R8_M13_ENTESOPATHYLOW	IVW	3	0.0269487	0.0350688	0.442218
finngen_R8_APPENDACUT_COMPLIC	IVW	3	0.0216074	0.028129	0.442395
finngen_R8_K11_POSTOPDIS	IVW	3	-0.0630221	0.0821515	0.442996
finngen_R8_L12_OTHACUSKINSUNNAS	IVW	3	-0.0646613	0.0846376	0.44488
finngen_R8_AB1_SALMONELLA_OTH	IVW	3	0.0538043	0.0705047	0.445385
finngen_R8_FG_CARDMYO	IVW	3	-0.0273016	0.0357974	0.445659
finngen_R8_RX_INFERTILITY	IVW	3	-0.0226773	0.0298722	0.447766
finngen_R8_H7_RETINANAS	IVW	3	-0.0608518	0.0802607	0.448345
finngen_R8_K11_CHOLANGI	IVW	3	0.0427823	0.0564448	0.448481
finngen_R8_DM_RETINA_PROLIF	IVW	3	0.0232485	0.030702	0.448911
finngen_R8_C3_CERVIX_UTERI_EXALLC	IVW	3	0.0307298	0.0406691	0.449887
finngen_R8_K11_CHRONHEP	IVW	3	0.0579963	0.0768143	0.450237
finngen_R8_G6_RADLES	IVW	3	0.0756701	0.100304	0.450603
finngen_R8_H7_CHORIORETINFLAM	IVW	3	0.0889493	0.117962	0.450819
finngen_R8_M13_GANGLION	IVW	3	-0.020628	0.0273649	0.450962
finngen_R8_O15_COMPLIC_PUERP	IVW	3	0.020244	0.0269084	0.451852
finngen_R8_M13_SHOULDERBURSITIS	IVW	3	0.104332	0.138779	0.452181
finngen_R8_I9_NONISCHCARDMYOP_STRICT	IVW	3	-0.0539344	0.0719574	0.453537
finngen_R8_K11_OTHENTERCOL	IVW	3	0.0282072	0.0376985	0.454321
finngen_R8_J10_NASALPOLYP	IVW	3	-0.0320456	0.0428319	0.454356
finngen_R8_N14_PYELONEPHR	IVW	3	-0.0116468	0.0156709	0.457355
finngen_R8_AUTOIMMUNE_NONTHYROID	IVW	3	0.0081369	0.0109508	0.457455
finngen_R8_Q17_CONGEN_MALFO_EYE_EAR_FACE_NECK	IVW	3	-0.0389992	0.0525097	0.45766
finngen_R8_M13_ARTHTROSIS_COX_PRIM_HIPSURG	IVW	3	0.0173033	0.023317	0.458032
finngen_R8_F5_MIXPER	IVW	3	-0.0357577	0.0483382	0.459458
finngen_R8_M13_CARTILAGE	IVW	3	0.0627754	0.0849558	0.459956
finngen_R8_L12_CELLULITIS	IVW	3	0.0212428	0.028878	0.461971
finngen_R8_ASTHMA_EOSINOPHIL_SUGG	IVW	3	-0.0342487	0.0466819	0.463155
finngen_R8_E4_HYPERPIT	IVW	3	-0.0438432	0.0598043	0.46349
finngen_R8_K11_INTESTOTH	IVW	3	0.00708748	0.00966844	0.463526
finngen_R8_CD2_BENIGN_ENDOCRINE_OTH	IVW	3	-0.0499538	0.0683362	0.464778
finngen_R8_K11_DULC	IVW	3	0.028506	0.039028	0.465146
finngen_R8_H8_HL_CON_NAS	IVW	3	-0.034246	0.046918	0.465444
finngen_R8_J10_PLEUROTH	IVW	3	0.0481025	0.0660289	0.466304
finngen_R8_L12_ATOPIC	IVW	3	0.0163722	0.0224757	0.466346
finngen_R8_MYELOPROF_NONCML	IVW	3	0.0387718	0.0534524	0.468236
finngen_R8_I9_TIA	IVW	3	0.0129744	0.0179784	0.470501
finngen_R8_T1D_EARLY	IVW	3	0.0393246	0.0545914	0.471313
finngen_R8_F5_DEMNAS	IVW	3	-0.0334515	0.0464622	0.471542
finngen_R8_M13_TROCHANTERICBURSITIS	IVW	3	0.0290644	0.0403857	0.471728
finngen_R8_F5_SCHZPHR	IVW	3	-0.0301181	0.0418767	0.472012
finngen_R8_O15_PREG_PROLONGED	IVW	3	0.0342261	0.0477121	0.473161
finngen_R8_K11_CONSTIPATION	IVW	3	0.00953928	0.0133262	0.474098
finngen_R8_AB1_INTESTINAL_INFECTIONS	IVW	3	0.0181542	0.0253852	0.474516
finngen_R8_N14_TUBULOINTNEPHRNAS	IVW	3	-0.0357921	0.0500748	0.474749
finngen_R8_C3_COLON_EXALLC	IVW	3	0.0275301	0.0385625	0.475283
finngen_R8_K11_ADHE	IVW	3	0.0344265	0.0483333	0.476296
finngen_R8_E4_DMNAS	IVW	3	-0.0196119	0.027571	0.476885
finngen_R8_ULCERENTER	IVW	3	0.0539866	0.0759155	0.476997
finngen_R8_E4_GOITRENOD	IVW	3	0.0421314	0.0593451	0.477742
finngen_R8_M13_SYNOTEND	IVW	3	-0.0134571	0.0189585	0.477816
finngen_R8_Z21_PROCREATIVE_MANAG	IVW	3	-0.0161625	0.0227731	0.477878
finngen_R8_N14_ENDOMETRIOSIS_ASRM_STAGE3_4	IVW	3	-0.0190586	0.0269818	0.47997
finngen_R8_F5_DEMINOTH	IVW	3	-0.0539005	0.0763181	0.480026
finngen_R8_E4_VOLUME	IVW	3	-0.032584	0.0461399	0.480064
finngen_R8_N14_SPERMATOCELE	IVW	3	-0.0352382	0.0500807	0.481664
finngen_R8_CPAP	IVW	3	-0.0203325	0.0289042	0.48178
finngen_R8_RX_N05C	IVW	3	-0.00716046	0.0101973	0.482558
finngen_R8_RHEUMA_ARHTROPAT_REACTIVE	IVW	3	0.0348439	0.0496245	0.482585
finngen_R8_O15_ANTEPART_HAEM_NAS	IVW	3	0.0332013	0.0474379	0.483996
finngen_R8_DM_NEPHROPATHY_EXMORE	IVW	3	-0.0263309	0.0376566	0.484403
finngen_R8_CD2_BENIGN_LARYNX	IVW	3	-0.0570874	0.081657	0.484481
finngen_R8_L12_NAIL_INGROW	IVW	2	-0.0444529	0.0638372	0.486211
finngen_R8_CD2_BENIGN_CONJUNCTIVA	IVW	3	-0.0560098	0.0806035	0.48713
finngen_R8_FALLS	IVW	3	0.0340391	0.0490498	0.487701
finngen_R8_G6_CERCYST	IVW	3	-0.0407304	0.058694	0.487717
finngen_R8_Q17_CONGEN_MALFO_CIRCULATO_SYSTEM	IVW	3	0.0380633	0.0551549	0.490121
finngen_R8_G6_OTHNEU	IVW	3	0.0102078	0.0148525	0.491906
finngen_R8_M13_CERVICDISC	IVW	3	0.015758	0.0229292	0.491927
finngen_R8_JUVEN_ARTHR	IVW	3	0.0406902	0.0595817	0.494651
finngen_R8_E4_GOITREMULTINOD	IVW	3	0.0215191	0.0315311	0.49494
finngen_R8_G6_FEMLAPOP	IVW	3	-0.0435851	0.0639483	0.495513
finngen_R8_I9_OTHOTH	IVW	3	0.0493178	0.0725318	0.496538
finngen_R8_N14_MENOPAUSOT	IVW	3	0.0692465	0.10201	0.497251
finngen_R8_H7_EYEADNEXOTH	IVW	2	-0.147394	0.217171	0.497326
finngen_R8_AB1_OTHER_SPIROCHAETAL	IVW	3	0.0402509	0.0593221	0.497445
finngen_R8_G6_XTRAPYROTH	IVW	3	0.0320767	0.0473925	0.498514
finngen_R8_L12_CORNSANDCALLOS	IVW	3	-0.0346846	0.0515218	0.500819
finngen_R8_H7_RETINOPATHYDIAB_NAS	IVW	3	-0.035683	0.0531223	0.501765
finngen_R8_KRA_PSY_SUBSTANCE_EXMORE	IVW	3	0.0112947	0.0168892	0.503652
finngen_R8_AB1_SEQULEAE_OF_INFECTIONS_AND_PARASITES	IVW	3	-0.0310807	0.04657	0.504518
finngen_R8_F5_SCHOLA	IVW	3	0.0454158	0.0680782	0.5047
finngen_R8_N14_MENORRHAGIA	IVW	3	-0.0201224	0.0301833	0.504981
finngen_R8_K11_MALABSORB	IVW	3	-0.0442646	0.0664127	0.505087
finngen_R8_N14_NEPHROTICSYND	IVW	3	0.052406	0.0787272	0.505625
finngen_R8_H7_PTERYGIUM	IVW	3	0.0570713	0.0858052	0.505969
finngen_R8_J10_ASTHMA_MAIN_EXMORE	IVW	3	-0.00895746	0.0135295	0.507926
finngen_R8_RX_CODEINE_TRAMADOL	IVW	3	0.00791466	0.011957	0.508019
finngen_R8_VOCALCORDDYS	IVW	3	-0.0477932	0.072212	0.50807
finngen_R8_CD2_BENIGN_ANUS_ANAL_CANAL	IVW	3	0.0562856	0.0853756	0.509722
finngen_R8_K11_PERITONITIS	IVW	3	0.0353458	0.0536596	0.510086
finngen_R8_Q17_VACTREL	IVW	3	0.0214602	0.0326964	0.5116
finngen_R8_F5_SPEECH	IVW	3	-0.0468825	0.0719382	0.514592
finngen_R8_M13_INFBURSA	IVW	3	-0.0675959	0.103895	0.515295
finngen_R8_O15_MEMBR_PREMAT_RUPT	IVW	3	0.0186936	0.0288419	0.516895
finngen_R8_L12_ABSCESS_CUT	IVW	3	-0.0169664	0.0262041	0.517325
finngen_R8_K11_ORAL_LICHEN_PLANUS_WIDE	IVW	3	-0.0201307	0.0311259	0.517794
finngen_R8_K11_ORAL_LEUCOPLAC_RELAT_INCLAVO	IVW	3	-0.0310436	0.0480213	0.517985
finngen_R8_E4_GLUCOPANCREAS	IVW	3	-0.0296534	0.0458859	0.518123
finngen_R8_I9_OTHPER	IVW	3	0.0317963	0.0494432	0.520167
finngen_R8_CD2_BENIGN_URINARY	IVW	3	0.0563449	0.0878618	0.521334
finngen_R8_D3_OTHERBLOOD	IVW	3	0.0341418	0.0535185	0.523511
finngen_R8_AD_LO_EXMORE	IVW	3	-0.0294902	0.0462911	0.524085
finngen_R8_CD2_BENIGN_LIP	IVW	3	-0.0603997	0.0949266	0.524596
finngen_R8_CONGEN_HEART_ARTER	IVW	3	0.0293823	0.0462963	0.525651
finngen_R8_M13_SYSTCONNECT	IVW	3	-0.01378	0.0217632	0.526617
finngen_R8_E4_DM1NASCOMP	IVW	3	-0.0194253	0.0306972	0.526861
finngen_R8_M13_SCOLIOSIS	IVW	3	0.0396807	0.0627178	0.526938
finngen_R8_C3_LIVER_INTRAHEPATIC_BILE_DUCTS_EXALLC	IVW	3	0.0540918	0.0855595	0.527248
finngen_R8_M13_FLATFOOT	IVW	3	-0.0332889	0.052677	0.527424
finngen_R8_K11_APHTA_RECUR	IVW	3	0.0585165	0.0927123	0.527935
finngen_R8_AB1_TUBERCU_OTH_ORG	IVW	3	0.0622593	0.098685	0.528113
finngen_R8_CD2_BENIGN_MELANOCYTIC_NOS	IVW	3	-0.0544208	0.0865283	0.529391
finngen_R8_K11_GINGIVA	IVW	3	0.0509115	0.081114	0.530231
finngen_R8_M13_RADICULOPATHY	IVW	3	0.0283498	0.0451952	0.530479
finngen_R8_G6_MONOLOWOTHUNS	IVW	3	0.0520798	0.0830928	0.530812
finngen_R8_CD2_BENIGN_COLON_NOS	IVW	3	0.0442397	0.0706229	0.531038
finngen_R8_ST19_FRACT_LOWER_LEG_INCLU_ANKLE	IVW	3	0.0105251	0.0168146	0.531347
finngen_R8_F5_DEMENTIA	IVW	3	-0.013025	0.020814	0.531459
finngen_R8_M13_LOOSEJOINT	IVW	3	-0.0912319	0.145815	0.531532
finngen_R8_H7_ENTROPION	IVW	3	-0.0304181	0.0487328	0.532508
finngen_R8_K11_KELAIBD	IVW	3	-0.0200727	0.0322487	0.533656
finngen_R8_K11_TEETH_HARD	IVW	3	-0.0260254	0.0418608	0.534131
finngen_R8_ILD	IVW	3	0.0223525	0.0359624	0.534238
finngen_R8_ILD_ENDPOINTS	IVW	3	0.0223525	0.0359624	0.534238
finngen_R8_CD2_BENIGN_THYROID	IVW	3	-0.0509877	0.0821298	0.534719
finngen_R8_E4_ENDODISNAS	IVW	2	-0.0716105	0.115354	0.534738
finngen_R8_JOINTPAIN	IVW	3	-0.00929839	0.0150166	0.535779
finngen_R8_L12_LUPUS	IVW	3	-0.0595378	0.0961961	0.535968
finngen_R8_L12_INTERNALSUBSTANCEDERM	IVW	3	0.0286349	0.0467161	0.539906
finngen_R8_D3_ACQHAEMOLYTICANAEMIA	IVW	3	-0.0573686	0.0936022	0.539944
finngen_R8_KRA_PSY_SCHIZODEL_EXMORE	IVW	3	0.01814	0.0296732	0.540983
finngen_R8_M13_THORACISPINEPAIN	IVW	3	0.0211473	0.0346244	0.541357
finngen_R8_M13_DORSOPATHY	IVW	3	-0.0052685	0.00866299	0.54308
finngen_R8_K11_TOOTH_DEV	IVW	3	0.0357017	0.0587325	0.543274
finngen_R8_G6_NEUROOTH	IVW	3	-0.0521395	0.0858027	0.543409
finngen_R8_C3_BLADDER_EXALLC	IVW	3	-0.0435511	0.0717923	0.544099
finngen_R8_HYPOTHY_REIMB	IVW	3	-0.0219798	0.0363282	0.545155
finngen_R8_G6_ALCODEGEN	IVW	3	0.0569006	0.0940739	0.545278
finngen_R8_H8_OTHEREAR	IVW	3	0.00717516	0.0119329	0.547646
finngen_R8_D3_ANAEMIA_B12_DEF	IVW	3	0.0413468	0.0689446	0.548699
finngen_R8_M13_DEFORMDORSO	IVW	3	0.0143721	0.0239652	0.5487
finngen_R8_N14_INFLAMMBREAST	IVW	3	-0.0468857	0.0782381	0.548993
finngen_R8_Z21_PROBL_RELATED_MEDICAL_FACILITI_OTH_HEALTH_CARE	IVW	3	0.0346539	0.0578504	0.549156
finngen_R8_H8_EXT_NAS	IVW	3	-0.0259864	0.0434486	0.549777
finngen_R8_M13_HALLUXRIGIDUS	IVW	3	-0.0208827	0.0349165	0.54979
finngen_R8_N14_PROSTHYPERPLA	IVW	3	-0.00991373	0.0166448	0.55144
finngen_R8_RHEUMA_SERONEG	IVW	3	0.0222056	0.0374834	0.553576
finngen_R8_K11_ORAL_LEUCOPLAC_RELAT	IVW	3	-0.034687	0.058743	0.554864
finngen_R8_AB1_DERMATOPHYTOSIS	IVW	3	-0.025304	0.0430133	0.556342
finngen_R8_MEMLOSS	IVW	3	0.0269566	0.0458819	0.556854
finngen_R8_N14_OTHPENIS	IVW	3	-0.027041	0.0460714	0.557246
finngen_R8_M13_OSTEOMYELITIS	IVW	3	-0.03267	0.0557055	0.557556
finngen_R8_M13_OTHERBONE	IVW	3	0.0190393	0.032501	0.558005
finngen_R8_M13_OLECRANONBURSITIS	IVW	3	0.0449876	0.0769075	0.558576
finngen_R8_L12_SEBORRHOEIC	IVW	3	-0.0267073	0.0456744	0.558728
finngen_R8_I9_ARTEMBTHR	IVW	3	-0.0323758	0.0554524	0.559322
finngen_R8_O15_MAT_CARE_MALPRESENT	IVW	3	0.0181493	0.0311143	0.559683
finngen_R8_ST19_FRACT_SHOUL_UPPER_ARM	IVW	3	-0.0126962	0.0217874	0.560076
finngen_R8_M13_DEQUERVAIN	IVW	3	-0.0348196	0.0597938	0.560345
finngen_R8_AD_AM_EXMORE	IVW	3	-0.0501613	0.0870366	0.564396
finngen_R8_CD2_BENIGN_MELANOCYTIC_TRUNK	IVW	3	0.0237699	0.0414368	0.566209
finngen_R8_F5_MOODOTH	IVW	3	0.0285179	0.0498677	0.56741
finngen_R8_TEMPOROMANDIB_INCLAVO	IVW	3	0.0120411	0.0211143	0.568489
finngen_R8_CD2_BENIGN_EAR_NASAL_SINUS	IVW	3	0.040816	0.0716073	0.56868
finngen_R8_K11_PULP_PERIAPICAL	IVW	3	-0.0124097	0.0218086	0.569336
finngen_R8_G6_ALZHEIMER	IVW	3	-0.0278277	0.0491212	0.571047
finngen_R8_N14_ENDOMETRIOSIS_NOS	IVW	3	0.0279936	0.0495735	0.572285
finngen_R8_N14_ENDOMETRIOSIS_UTERUS	IVW	3	0.0204282	0.0362354	0.572915
finngen_R8_F5_CANNABIS	IVW	3	0.0764279	0.135696	0.573279
finngen_R8_O15_LABOUR_OBSTR_OTHER	IVW	3	-0.0276758	0.0492692	0.574303
finngen_R8_M13_BICIPITALTEND	IVW	3	-0.035746	0.0636436	0.574349
finngen_R8_N14_GENITOUROTH	IVW	3	0.0216414	0.0388109	0.57711
finngen_R8_C3_SCLC_EXALLC	IVW	3	-0.0507687	0.0910797	0.577248
finngen_R8_C3_BREAST_EXALLC	IVW	3	-0.0110529	0.0199424	0.579414
finngen_R8_M13_ANKYLOSPON_STRICT	IVW	3	0.0368956	0.0666662	0.579964
finngen_R8_C3_KIDNEY_NOTRENALPELVIS_EXALLC	IVW	3	0.0282781	0.0512256	0.580928
finngen_R8_M13_MUSCULOSKELEOTH	IVW	3	0.02039	0.0369524	0.581092
finngen_R8_INV_VENT	IVW	3	0.0285483	0.0518982	0.582262
finngen_R8_L12_OTHERCONTACT	IVW	3	0.0421024	0.0767264	0.583187
finngen_R8_O15_LABOUR_ABNORM_FORCES	IVW	3	-0.0364734	0.0667343	0.58469
finngen_R8_RX_CROHN_1STLINE	IVW	3	-0.00543044	0.00994314	0.584964
finngen_R8_M13_HAMMERTOE	IVW	3	-0.0210839	0.0386515	0.585419
finngen_R8_AB1_VIRAL_NOS	IVW	3	-0.0164795	0.0302561	0.585983
finngen_R8_G6_PARDIPLE	IVW	3	0.0512554	0.0941716	0.586251
finngen_R8_J10_RESPOTHER	IVW	3	-0.0187404	0.0346461	0.58857
finngen_R8_H8_CHOLEASTOMA	IVW	2	0.0347138	0.0642285	0.58887
finngen_R8_J10_SEPTDEV	IVW	3	-0.0117547	0.0217897	0.589569
finngen_R8_J10_VIRALPNEUMO	IVW	3	-0.0217503	0.0404786	0.59104
finngen_R8_F5_PSYCHOTH	IVW	3	0.0188076	0.035005	0.591071
finngen_R8_N14_ACUTENEPHRITIC	IVW	3	0.0508925	0.0951934	0.592912
finngen_R8_H7_ECTROPION	IVW	3	0.0574268	0.107432	0.592967
finngen_R8_OTHER_SYSTCON_FG	IVW	3	0.0135996	0.0254499	0.593088
finngen_R8_N14_OTHETNASKIDUR	IVW	3	-0.0414978	0.0777072	0.593323
finngen_R8_C3_FEMALE_GENITAL_EXALLC	IVW	3	0.0207832	0.0391871	0.595863
finngen_R8_AB1_GONOCOCCAL	IVW	3	0.0455571	0.0859315	0.596004
finngen_R8_N14_FEMALEINFERT	IVW	3	-0.0180845	0.034191	0.596858
finngen_R8_ST19_FRACT_FEMUR	IVW	3	0.0185507	0.0351079	0.597228
finngen_R8_J10_INFLUENZA	IVW	3	0.013363	0.0253288	0.597789
finngen_R8_H7_CORNEALSCAR	IVW	3	0.0560715	0.106684	0.599177
finngen_R8_L12_PAPULOSQUAMOUS	IVW	3	0.0171068	0.0326773	0.600621
finngen_R8_O15_DELIV_MULTIP	IVW	3	0.02505	0.047907	0.601052
finngen_R8_L12_INFECT_DERM	IVW	3	-0.0209359	0.0400394	0.601056
finngen_R8_C3_COLON_ADENO_EXALLC	IVW	3	-0.0229674	0.0439532	0.601293
finngen_R8_F5_STRESSOTH	IVW	3	-0.0105443	0.0202187	0.602011
finngen_R8_J10_CHRONSINUSITIS	IVW	3	-0.00971831	0.0186618	0.602535
finngen_R8_H7_AMBLYANOPSIA	IVW	3	0.054614	0.104892	0.602597
finngen_R8_M13_TENDOSYNOVITISNAS	IVW	3	-0.0237372	0.0456085	0.602745
finngen_R8_AUTOIMMUNE_NONTHYROID_STRICT	IVW	3	0.00578804	0.0111464	0.603571
finngen_R8_H8_EXTOTITIS	IVW	3	-0.0152245	0.0293342	0.60376
finngen_R8_CD2_BENIGN_LIPO_NOS	IVW	3	0.0276467	0.053556	0.605701
finngen_R8_L12_LICHSIMPANDPRURIGO	IVW	3	0.0294104	0.0570798	0.606378
finngen_R8_H7_RETINOPATHYDIAB_BKG	IVW	3	-0.0191974	0.03742	0.607934
finngen_R8_K11_ERUPTION_INCLAVO	IVW	3	-0.0213534	0.0416916	0.608529
finngen_R8_ALLERG_ASTHMA	IVW	3	0.0123767	0.0241936	0.608953
finngen_R8_K11_SALIVARY	IVW	3	0.0151254	0.0295888	0.609221
finngen_R8_Q17_OTHER_CONGEN_MALFO_CIRCULATO_SYSTEM	IVW	3	0.0470246	0.0922835	0.610355
finngen_R8_M13_LOWBACKPAIN	IVW	2	0.0077492	0.0153349	0.613327
finngen_R8_G6_ATYFAC	IVW	3	0.0315845	0.0625669	0.613692
finngen_R8_CARDIAC_ARRHYTM	IVW	3	0.00579656	0.0116144	0.617721
finngen_R8_IPF	IVW	3	0.0254706	0.051282	0.619417
finngen_R8_AB1_BACT_BIR_OTHER_INF_AGENTS	IVW	3	-0.0270789	0.054523	0.619436
finngen_R8_G6_POSTOPNEURO	IVW	3	-0.0249139	0.0504094	0.621142
finngen_R8_M13_INTERVERTEB	IVW	3	0.00631342	0.0128197	0.622382
finngen_R8_CD2_NONHODGKIN_NAS_EXALLC	IVW	3	-0.0341865	0.0694263	0.622427
finngen_R8_H7_CONVERSTRAB	IVW	3	0.0319992	0.0651361	0.623238
finngen_R8_N14_ENDOMETRIOSIS_OVARY	IVW	3	-0.0151888	0.030989	0.624038
finngen_R8_L12_ULCERLOWLIMB	IVW	3	-0.0236171	0.0483894	0.625505
finngen_R8_M13_POSTOPMUSCULOSKE	IVW	3	-0.0274089	0.0562086	0.625814
finngen_R8_H7_EYELIDDIS	IVW	3	0.00982167	0.0201431	0.625836
finngen_R8_G6_BELLPA	IVW	3	-0.0301358	0.0619555	0.626676
finngen_R8_K11_ILEUS	IVW	3	0.0124158	0.0255358	0.626818
finngen_R8_O15_LABOUR_INTRAPART_HAEMORRH	IVW	3	0.0292189	0.0601839	0.627326
finngen_R8_C3_MENINGES_EXALLC	IVW	3	0.0362864	0.0751248	0.629085
finngen_R8_I9_ANEURYSM	IVW	3	0.0299848	0.0625444	0.631642
finngen_R8_J10_CHRONRHINITIS	IVW	3	0.0142542	0.0298284	0.632739
finngen_R8_C3_MENINGIOMA_EXALLC	IVW	3	0.0336576	0.0706378	0.633731
finngen_R8_M13_DUPUTRYEN	IVW	3	0.015484	0.0326961	0.635803
finngen_R8_KRA_PSY_DEVWIDE_EXMORE	IVW	3	0.0774611	0.163594	0.63586
finngen_R8_L12_PSORIASIS	IVW	3	0.0146898	0.0310381	0.636012
finngen_R8_C3_BRAIN_EXALLC	IVW	3	0.0370475	0.0783116	0.636157
finngen_R8_RHEU_ARTHRITIS_OTH	IVW	3	0.010693	0.0226125	0.636299
finngen_R8_K11_REFLUX	IVW	3	0.00706255	0.0150327	0.63849
finngen_R8_COPD_INSUFFICIENCY	IVW	3	-0.0190757	0.040638	0.63878
finngen_R8_T1D_STRICT1	IVW	3	0.0282876	0.0602676	0.638807
finngen_R8_N14_ABNORMALBLEED	IVW	3	-0.0115837	0.0247024	0.639119
finngen_R8_I9_DISVEINLYMPH	Wald ratio	1	-0.00586662	0.0125166	0.639278
finngen_R8_L12_FOLICULAROTH	IVW	3	0.0251404	0.0538561	0.640638
finngen_R8_REAC_ARTHRO_NOS	IVW	3	0.0248527	0.0532515	0.640712
finngen_R8_M13_DISSYNOTENDNAS	IVW	3	0.0290458	0.0629905	0.644717
finngen_R8_G6_MENINGBACT	IVW	3	0.0472933	0.103186	0.646714
finngen_R8_N14_VAGINAL_DYSPLASIA_ALL	IVW	3	-0.0418886	0.0915508	0.647279
finngen_R8_O15_DELIV_SPONT	IVW	3	0.00791828	0.0173948	0.648959
finngen_R8_K11_FEMHER	IVW	3	0.0292479	0.0642553	0.648977
finngen_R8_ARTHRO_SPEC	IVW	3	-0.0485924	0.107454	0.651114
finngen_R8_I9_RBBB	IVW	3	0.0337353	0.0751112	0.653332
finngen_R8_M13_METATARSALGIA	IVW	3	0.0203487	0.0453184	0.653421
finngen_R8_K11_PARODON_OPER_DENTAL_OPER	IVW	3	0.00676404	0.0151155	0.654521
finngen_R8_H7_HERPESKERATITIS	IVW	3	-0.0305671	0.0684123	0.655015
finngen_R8_NONALLERG_ASTHMA_EXMORE	IVW	3	0.0158851	0.0356962	0.656314
finngen_R8_C3_NSCLC_ADENO_EXALLC	IVW	3	-0.0276125	0.0622994	0.657605
finngen_R8_E4_HYTHYNAS	IVW	3	-0.00558317	0.0126187	0.658163
finngen_R8_I9_OTHANEUR	IVW	3	0.0270841	0.0612961	0.658593
finngen_R8_CD2_BENIGN_MELANOCYTIC	IVW	3	0.0127075	0.0287842	0.658869
finngen_R8_AB1_VIRAL_OTHER_INTEST_INFECTIONS	IVW	3	0.0128264	0.0290747	0.659101
finngen_R8_CD2_BENIGN_SKIN	IVW	3	-0.00940301	0.021326	0.659272
finngen_R8_K11_OTHDISSTOMDUOD	IVW	3	-0.0241082	0.0546823	0.659302
finngen_R8_N14_FIOTHNAS	IVW	3	-0.0154217	0.0350144	0.65962
finngen_R8_I9_VEINSOTH	IVW	3	0.00935889	0.0213196	0.660675
finngen_R8_I9_VARICVEOES	IVW	3	-0.0317791	0.0726526	0.661812
finngen_R8_AB1_OTHER_VIRAL	IVW	3	-0.0102677	0.023569	0.663096
finngen_R8_L12_HYPETROPHICSCAR	IVW	3	0.0263235	0.0604309	0.663129
finngen_R8_N14_ENDOMETRIOSIS	IVW	3	-0.00877546	0.0202217	0.664315
finngen_R8_K11_ABSCANAL	IVW	3	0.0197715	0.0457058	0.665319
finngen_R8_C3_LUNG_NONSMALL_EXALLC	IVW	3	-0.015438	0.0357153	0.665558
finngen_R8_AD_EO_EXMORE	IVW	3	-0.029331	0.0683463	0.667812
finngen_R8_ST19_FRACT_FOOT_ANKLE	IVW	3	-0.0149217	0.0347798	0.6679
finngen_R8_K11_LIP_ORAL_MUCOSA	IVW	3	-0.0171022	0.0398769	0.668015
finngen_R8_K11_OTHILEUS	IVW	3	0.0131317	0.0307563	0.669408
finngen_R8_J10_TONSILLITIS	IVW	3	-0.0141839	0.0332482	0.669666
finngen_R8_N14_PROHERNOV	IVW	3	0.0294355	0.0695756	0.672242
finngen_R8_L12_GRANULOMATOUSSKIN	IVW	3	-0.0373185	0.0884344	0.673032
finngen_R8_CD2_BENIGN_SALIVARY_NOS	IVW	3	-0.0354094	0.08412	0.673799
finngen_R8_I9_CHD	IVW	3	-0.00551668	0.0131148	0.674015
finngen_R8_H7_RETINOPATHYDIAB_BKG_SEVERE	IVW	3	-0.0381293	0.0908299	0.67464
finngen_R8_RX_GLUCOSAMINE	IVW	3	-0.00823717	0.0196976	0.675814
finngen_R8_O15_OBSTET_TRAUMA_OTHER	IVW	3	-0.030712	0.0741803	0.678861
finngen_R8_J10_PNEUMONONBACT	IVW	3	0.033232	0.0805391	0.679886
finngen_R8_E4_FH	IVW	3	-0.0135676	0.0330334	0.681274
finngen_R8_CHRONLARGE	IVW	3	-0.023906	0.0583261	0.681902
finngen_R8_M13_OSTEOCHONDROPATHY	IVW	3	-0.0207137	0.0506463	0.682549
finngen_R8_N14_PROSTATITIS	IVW	3	-0.0158573	0.0388045	0.6828
finngen_R8_KRA_PSY_CHILDEMOT_EXMORE	IVW	3	0.0364085	0.0892616	0.683358
finngen_R8_CAMPYLOENTERITIS	IVW	3	-0.0359299	0.0882857	0.684027
finngen_R8_D3_THROMBOCYTOPENIANAS	IVW	3	0.0217865	0.0535491	0.684117
finngen_R8_H7_KERATITISINOTH	IVW	3	0.030185	0.0742583	0.684386
finngen_R8_G6_BRACHPLE	IVW	3	0.0180722	0.0444721	0.68447
finngen_R8_CD2_NONFOLLICULAR_LYMPHOMA_EXALLC	IVW	3	-0.0183775	0.0452393	0.684574
finngen_R8_H7_IRIDOCHRONIC	IVW	3	0.0254093	0.0627755	0.685651
finngen_R8_K11_PARALIL	IVW	3	-0.028519	0.0707843	0.687022
finngen_R8_INFLUENZA	IVW	3	0.0132021	0.032801	0.687322
finngen_R8_G6_TRINEU	IVW	3	-0.0232747	0.0579319	0.687861
finngen_R8_C3_PROSTATE_EXALLC	IVW	3	0.0103139	0.0257587	0.688859
finngen_R8_I9_HYPOTE	IVW	3	-0.0263472	0.0661805	0.690548
finngen_R8_T1D_WIDE	IVW	3	-0.0101864	0.0255881	0.690562
finngen_R8_N14_MENSIRREG	IVW	3	-0.0105594	0.0265336	0.690656
finngen_R8_F5_ANOREX	IVW	3	0.0268629	0.0675646	0.690934
finngen_R8_CD2_FOLLICULAR_LYMPHOMA_EXALLC	IVW	3	-0.0401442	0.101236	0.691706
finngen_R8_TEMPOROMANDIB	IVW	3	-0.0124247	0.0315078	0.693333
finngen_R8_L12_EPIDERMTHICKNAS	IVW	3	0.0381984	0.0973805	0.694867
finngen_R8_SPONDYLOPATHY_FG	IVW	3	0.013467	0.0343456	0.694983
finngen_R8_F5_SEDAHYP	IVW	3	0.019532	0.0500378	0.696281
finngen_R8_D3_IMMUDEF	IVW	3	-0.0269752	0.0693559	0.697322
finngen_R8_H7_ANISOMETROPIA	IVW	3	-0.0354567	0.0914408	0.698197
finngen_R8_H8_HL_SEN_NAS	IVW	3	-0.00541955	0.0139807	0.698278
finngen_R8_F5_VASCDEM	IVW	3	-0.0350552	0.0904557	0.698357
finngen_R8_L12_FOODDERMAT	IVW	3	-0.0292721	0.0757304	0.699104
finngen_R8_K11_ACUTGASTR	IVW	3	-0.0182659	0.0473637	0.699754
finngen_R8_ST19_TOXIC_EFFECT_ALCOHOL	IVW	3	-0.0351589	0.091204	0.699869
finngen_R8_H7_GLAUCOMA_POAG	IVW	3	0.0105897	0.0275391	0.700583
finngen_R8_VD_SC	IVW	3	-0.0354757	0.0927441	0.702082
finngen_R8_ULCEROTH	IVW	3	-0.0293662	0.0767889	0.702144
finngen_R8_M13_MEDIALEPICOND	IVW	3	-0.0274346	0.0718913	0.702749
finngen_R8_L12_DISORDSKINAPPENDIX	IVW	3	0.00720784	0.0189097	0.703076
finngen_R8_N14_ENDOMETRIOSIS_RECTPVAGSEPT_VAGINA	IVW	3	-0.0204164	0.0535805	0.703172
finngen_R8_E4_VIT_B_DEF	IVW	3	0.0623645	0.164331	0.704313
finngen_R8_F5_ALZHDEMENT	IVW	3	0.0131313	0.0347621	0.705619
finngen_R8_N14_IMPOTENCE	IVW	3	-0.025537	0.067802	0.706441
finngen_R8_O15_MATERN_CARE_FETAL_ABNORM	IVW	3	0.0173674	0.0463492	0.707877
finngen_R8_I9_MI_STRICT	IVW	3	-0.00645769	0.017263	0.708347
finngen_R8_N14_OVARYCYST	IVW	3	0.00666245	0.017811	0.708357
finngen_R8_O15_PRETERM	IVW	3	-0.0155261	0.0415901	0.708915
finngen_R8_CD2_BENIGN_CONNSOFT_UPPERLIMB	IVW	3	0.02526	0.0679732	0.710178
finngen_R8_M13_ENTESOPATHYOTH	IVW	3	0.00857647	0.0230888	0.710297
finngen_R8_NIV	IVW	3	-0.0124735	0.0337179	0.71143
finngen_R8_NEURODEGOTH	IVW	3	-0.013131	0.0355458	0.711821
finngen_R8_J10_PHARYNGITIS	IVW	2	0.0132987	0.0360602	0.712283
finngen_R8_F5_INSOMNIA	IVW	3	0.0153473	0.0416998	0.712841
finngen_R8_M13_JUVERHEU	IVW	3	0.0316416	0.0862784	0.713814
finngen_R8_PSORI_STRICT	IVW	3	-0.0318376	0.0871075	0.71474
finngen_R8_CD2_HODGKIN_LYMPHOMA_EXALLC	IVW	3	0.0301861	0.0827727	0.715345
finngen_R8_AB1_PROTOZOAL	IVW	3	0.041012	0.112991	0.716629
finngen_R8_I9_ENDOCARD	IVW	3	0.0336597	0.0928559	0.716983
finngen_R8_K11_MISS_TEETH_ACCID_EXTR_PAROD	IVW	3	-0.0148826	0.041066	0.717048
finngen_R8_D3_BLOODOTHER	IVW	3	-0.0126735	0.035034	0.71754
finngen_R8_DM_KETOACIDOSIS	IVW	3	0.00972663	0.0269613	0.718277
finngen_R8_H8_EXTDISINOTH	IVW	3	-0.0308276	0.085756	0.719236
finngen_R8_M13_ADHCAPSULITIS	IVW	3	-0.0161948	0.0453314	0.720902
finngen_R8_H7_GLAUCOMAMEDICATION	IVW	3	0.0173084	0.0485087	0.721234
finngen_R8_I9_HYPTENSRD	IVW	3	0.0323396	0.0908535	0.721875
finngen_R8_K11_ORAL_LICHEN_PLANUS_INCLAVO	IVW	3	-0.023617	0.0664482	0.722275
finngen_R8_I9_AVBLOCK	IVW	3	-0.0166568	0.0469875	0.722969
finngen_R8_H7_RETINOPATHYDIAB_PROLIF	IVW	3	-0.0289423	0.0819679	0.724019
finngen_R8_F5_MIXEDDEV	IVW	3	0.0630051	0.178775	0.724519
finngen_R8_M13_SPONDYLOLISTHESIS	IVW	3	-0.0109175	0.0310204	0.724879
finngen_R8_K11_DISORD_TEETH	IVW	3	0.0100529	0.0286169	0.72537
finngen_R8_G6_ENCEPHOTH	IVW	3	0.0306369	0.0873453	0.725771
finngen_R8_G6_CPETAL	IVW	3	0.0134921	0.0389296	0.728909
finngen_R8_L12_PSORI_VULG	IVW	3	0.0114134	0.0330704	0.730002
finngen_R8_G6_PARKINSON	IVW	3	0.0123267	0.0357517	0.730256
finngen_R8_J10_ASTHMACOPDKELA	IVW	3	-0.00414307	0.0120311	0.730572
finngen_R8_N14_EROSECTROPUT	IVW	3	-0.0284702	0.0829148	0.731323
finngen_R8_O15_PREG_ABORT	IVW	3	-0.00376836	0.011003	0.731987
finngen_R8_CD2_BENIGN_LIPO_SKIN_LIMBS	IVW	3	0.0169663	0.0499658	0.73419
finngen_R8_I9_REVASC	IVW	3	-0.00596978	0.0175839	0.734231
finngen_R8_K11_PERITON	IVW	3	0.0139934	0.0412577	0.734481
finngen_R8_K11_PERIODON_CHRON	IVW	3	-0.0148976	0.0440887	0.735438
finngen_R8_H8_HL_MIX_NAS	IVW	3	-0.013093	0.0388742	0.736264
finngen_R8_KRA_PSY_MENTALRET_EXMORE	IVW	3	0.0312441	0.0929047	0.736643
finngen_R8_AB1_VIRAL_HEMOR_FEVER_NOS	IVW	3	-0.0164702	0.0496591	0.740143
finngen_R8_M13_CERVICOCRANSDR	IVW	3	-0.0201367	0.0607303	0.74021
finngen_R8_CD2_PRIMARY_LYMPHOID_HEMATOPOIETIC_EXALLC	IVW	3	0.00901305	0.027221	0.740564
finngen_R8_N14_FEMALE_GENITAL_DYSPLASIA_ALL	IVW	3	0.00821472	0.0248513	0.74098
finngen_R8_N14_BENIGNMAMDYSP	IVW	3	-0.0243571	0.0740352	0.74216
finngen_R8_D3_ACUTEPOSTBLEEDANAEMIA	IVW	3	0.0242258	0.073729	0.742474
finngen_R8_M13_ROTATORCUFF	IVW	3	0.00519565	0.0158212	0.74261
finngen_R8_E4_LACTONAS	IVW	3	0.0281743	0.0861344	0.743595
finngen_R8_K11_ENERCOLNONINF	IVW	3	0.00719731	0.0220451	0.74406
finngen_R8_F5_OCD	IVW	3	0.0173518	0.0534834	0.745609
finngen_R8_N14_POSTMENATRVAG	IVW	3	0.0189859	0.058686	0.746305
finngen_R8_CD2_BENIGN_SALIVARY	IVW	3	-0.0151889	0.0470039	0.746589
finngen_R8_F5_STIMUL	IVW	3	-0.0255451	0.0791014	0.74674
finngen_R8_I9_LBBB	IVW	3	-0.0173232	0.0538543	0.747704
finngen_R8_Q17_SEPTA_DEFEC	IVW	3	0.0321717	0.100098	0.747906
finngen_R8_ST19_FRACT_FOREA	IVW	3	-0.00830638	0.0259239	0.748654
finngen_R8_ALLERGIC_CONTACT_DERMA_DRUGS_CONTACT_W_SKIN	IVW	3	-0.0358566	0.11195	0.748747
finngen_R8_H8_HL_NAS	IVW	3	-0.0178515	0.0558333	0.749174
finngen_R8_H7_VISUDISTURBSUB	IVW	3	-0.00878394	0.0276437	0.75067
finngen_R8_CD2_BENIGN_MELANOCYTIC_FACE	IVW	3	-0.0186445	0.0587213	0.750858
finngen_R8_H7_CONJUNCTIVITISCHRON	IVW	3	-0.0262116	0.0826847	0.751238
finngen_R8_H7_CONJUNCTIVITISATOPIC	IVW	3	0.0212398	0.0671685	0.751838
finngen_R8_E4_HYPOKALAEMIA	IVW	3	-0.0130263	0.041297	0.752435
finngen_R8_G6_EPIPAROX	IVW	3	0.00375665	0.0119361	0.752966
finngen_R8_E4_HYPERALDO	IVW	3	0.0277343	0.0885573	0.754144
finngen_R8_F5_PTSD	IVW	3	0.021629	0.0692474	0.75478
finngen_R8_E4_LIPOPROT	IVW	3	-0.00408338	0.0131415	0.75601
finngen_R8_H7_RETINALDETACHOTH	IVW	3	-0.0260892	0.0840494	0.756254
finngen_R8_GE	IVW	3	-0.0198528	0.0639679	0.75629
finngen_R8_AUTOIMMUNE	IVW	3	0.00271062	0.00874892	0.756695
finngen_R8_K11_OTHABDHER	IVW	3	-0.021885	0.0709096	0.757602
finngen_R8_FG_CVD	IVW	3	-0.00269641	0.0087516	0.758002
finngen_R8_THYROTOXICOSIS	IVW	3	0.00799649	0.0259816	0.758254
finngen_R8_H8_EXT_INFNAS	IVW	3	0.0177533	0.058056	0.75976
finngen_R8_H8_HL_IDIOP	IVW	3	-0.020885	0.0692436	0.762944
finngen_R8_N14_OLIGOMEN	IVW	3	-0.0214705	0.0714098	0.763669
finngen_R8_H7_GLAUCCLOSEPRIM	IVW	3	-0.0200253	0.0668188	0.76441
finngen_R8_M13_SACROILIITIS	IVW	3	-0.0187415	0.0627142	0.765062
finngen_R8_L12_DERMATITISNAS	IVW	3	-0.00481257	0.0162516	0.767131
finngen_R8_CD2_MYELOID_LEUKAEMIA_EXALLC	IVW	3	0.0266379	0.0903477	0.768118
finngen_R8_E4_OBESITYXTRMALV	IVW	3	0.0298719	0.101666	0.768894
finngen_R8_J10_UPPERINFEC	IVW	3	-0.00549071	0.0187029	0.769083
finngen_R8_ASTHMA_CHILD_EXMORE	IVW	3	0.0118525	0.0403978	0.76922
finngen_R8_N14_FEMALEGENNONINF	IVW	3	0.00298587	0.0101883	0.76947
finngen_R8_E4_CONGEIOD	IVW	3	-0.0222479	0.0765198	0.771245
finngen_R8_M13_MCTD	IVW	3	0.0175834	0.0607216	0.772142
finngen_R8_AMN2	IVW	3	-0.0265168	0.0917809	0.772647
finngen_R8_G6_SLEEPAPNO	IVW	3	-0.00429043	0.0148875	0.773202
finngen_R8_GEST_DIABETES	IVW	3	-0.0061733	0.0214892	0.773902
finngen_R8_L12_CHRONICULCEROFSKIN	IVW	3	0.0157506	0.0548279	0.773903
finngen_R8_CD2_BENIGN_TRANSVERSE_COLON	IVW	3	0.0202198	0.0704487	0.774101
finngen_R8_POLYCYTVERA	IVW	3	0.0215608	0.075181	0.774277
finngen_R8_J10_BRONCHIECTASIS	IVW	3	-0.0169983	0.059283	0.774317
finngen_R8_N14_OVARTORS	IVW	3	-0.0262033	0.0925659	0.777118
finngen_R8_H7_CONJUVASC	IVW	3	-0.0267113	0.0945146	0.777472
finngen_R8_J10_BRONCHIOLITIS	IVW	3	-0.0151186	0.0535246	0.777589
finngen_R8_M13_ARTHROSIS	IVW	3	-0.0029289	0.0103812	0.77784
finngen_R8_L12_PSORI_ARTHRO	IVW	3	0.0180833	0.0643267	0.778622
finngen_R8_J10_ACUTEUPPERINFEC	IVW	3	-0.00376918	0.0134097	0.778651
finngen_R8_H8_VESTIBNEUR	IVW	3	0.0133732	0.0476329	0.778898
finngen_R8_SCND_OTH_COXARTHROSIS	IVW	3	-0.0220568	0.0791333	0.780452
finngen_R8_AB1_SCABIES	IVW	3	0.0192371	0.0697116	0.782584
finngen_R8_K11_ORAL	IVW	3	-0.00226459	0.0082432	0.783529
finngen_R8_CHRONNAS	IVW	3	-0.014215	0.0518187	0.783837
finngen_R8_C3_MALE_GENITAL_EXALLC	IVW	3	0.00660112	0.0240809	0.78399
finngen_R8_K11_PARODON_OPER	IVW	3	-0.00395069	0.0144403	0.784401
finngen_R8_L12_BULLOTH	IVW	3	-0.0236796	0.0867099	0.784784
finngen_R8_I9_ARTOTH	IVW	3	-0.0121388	0.0445936	0.785461
finngen_R8_N14_UTER_POLYP	IVW	3	0.0119933	0.0441611	0.785944
finngen_R8_M13_RHEUMA	IVW	3	0.00582317	0.0214754	0.786272
finngen_R8_H7_HORDEOLUM	IVW	3	0.0174045	0.0645083	0.787312
finngen_R8_N14_DISIMPAIRRENTUB	IVW	3	0.0233541	0.0869463	0.788234
finngen_R8_M13_BURSOPATHY	IVW	3	0.00992762	0.0370586	0.788784
finngen_R8_L12_EPIDERMALTHICKOTH	IVW	3	-0.0245526	0.0916934	0.788878
finngen_R8_K11_CROSSBITE	IVW	3	-0.0155035	0.0581112	0.78963
finngen_R8_Q17_CRANIOSYNOSTOSIS	IVW	3	-0.0318222	0.119529	0.790061
finngen_R8_J10_ACUTELOWERNAS	IVW	3	-0.00906132	0.0340631	0.790227
finngen_R8_F5_SUBSNOALCO	IVW	3	0.00773114	0.0291837	0.791076
finngen_R8_M13_CONNECTNAS	IVW	3	0.0205068	0.0783021	0.793404
finngen_R8_K11_BARRET	IVW	3	0.0185561	0.071015	0.793863
finngen_R8_O15_GESTAT_OEDEM_PREINUR	IVW	3	-0.0116805	0.0450016	0.795205
finngen_R8_O15_LABOUR_UMBILICAL	IVW	3	-0.0293442	0.113192	0.795448
finngen_R8_O15_PREEC_OR_FETGRO	IVW	3	-0.00620939	0.0240919	0.796609
finngen_R8_N14_OTHDISMALEGEN	IVW	3	-0.0197466	0.0770325	0.797687
finngen_R8_N14_RENALTUBULOOTH	IVW	3	-0.0261326	0.102824	0.79938
finngen_R8_M13_BIOMECHLESIO	IVW	3	0.0223516	0.0884521	0.800502
finngen_R8_CD2_BENIGN_OTHER_NOS	IVW	3	-0.0197754	0.078378	0.800802
finngen_R8_CD2_BENIGN_MOUTH_PHARYNX	IVW	3	-0.0102514	0.0408267	0.80174
finngen_R8_M13_RHEUMATISM	IVW	3	0.00893596	0.035788	0.802826
finngen_R8_K11_OESULC	IVW	3	0.0187198	0.0750711	0.803082
finngen_R8_GOUT_NOS	IVW	3	-0.00811075	0.0325889	0.803453
finngen_R8_G6_PLANTAR	IVW	3	-0.0171953	0.0692036	0.803768
finngen_R8_L12_ALOPECAREATA	IVW	3	0.0370053	0.149352	0.80431
finngen_R8_H8_CERUMEN	IVW	3	-0.0132177	0.0534271	0.804601
finngen_R8_N14_HYDROCELE	IVW	3	-0.0124689	0.0504942	0.804956
finngen_R8_K11_CARIES_2	IVW	3	-0.00400951	0.0162763	0.805419
finngen_R8_J10_PNEUMOTHORAX	IVW	3	-0.0127363	0.0517305	0.805524
finngen_R8_C3_OESOPHAGUS_EXALLC	IVW	3	0.0235449	0.0970695	0.808348
finngen_R8_OSTPOPATFRCTURE_POSTEMENO	IVW	3	0.0154989	0.0639886	0.808614
finngen_R8_K11_FISTULA	IVW	3	-0.00578924	0.0247441	0.815012
finngen_R8_K11_MAJOR_ANOMALI_JAW_SIZE_INCLAVO	IVW	3	-0.0199754	0.0854116	0.815084
finngen_R8_F5_NEUROTICOTH	IVW	3	0.013514	0.0580068	0.815782
finngen_R8_K11_HAEMORR	IVW	3	-0.00900935	0.0387832	0.816305
finngen_R8_GENERALI_SKIN_ERUPT_DRUGS_MEDICAM	IVW	3	-0.0167163	0.071995	0.816393
finngen_R8_PDSTRICT_EXMORE	IVW	3	0.00901938	0.0389554	0.816902
finngen_R8_DM_VITREOUS_BLEEDING	IVW	3	0.0101263	0.0440468	0.81817
finngen_R8_ASTHMA_ALLERG	IVW	3	-0.00790111	0.0345575	0.819151
finngen_R8_M13_POLYMYALGIA	IVW	3	-0.00911205	0.0398659	0.819205
finngen_R8_CHRONSMALL	IVW	3	-0.0214911	0.0940465	0.819245
finngen_R8_J10_VOCALLARYNX	IVW	3	-0.00430762	0.018931	0.820001
finngen_R8_ULCERPROCT	IVW	3	0.0125171	0.0556165	0.821933
finngen_R8_N14_GLOMEINOTH	IVW	3	-0.00959649	0.0426955	0.822161
finngen_R8_N14_DIALYSIS	IVW	3	-0.0158141	0.0705053	0.822527
finngen_R8_ASTHMA_OBESITY	IVW	3	-0.00516465	0.0235536	0.826438
finngen_R8_H7_VITROPACIT	IVW	3	-0.016183	0.0741568	0.827253
finngen_R8_L12_ACNE	IVW	2	0.0230275	0.105587	0.827359
finngen_R8_K11_DISLIVOTH	IVW	3	-0.014541	0.0667479	0.827547
finngen_R8_I9_HYPERTROCARDMYOP	IVW	3	-0.0180497	0.0829747	0.827793
finngen_R8_AB1_MYCOSES	IVW	3	0.00747515	0.0346596	0.829242
finngen_R8_U22_COVID19_SUSPECTED	IVW	3	-0.00811271	0.0377594	0.829882
finngen_R8_N14_CHRONTUBULOINTNEPHRITIS	Wald ratio	1	-0.0161738	0.0769219	0.833463
finngen_R8_E4_PCOS	IVW	3	-0.0191921	0.0918307	0.834453
finngen_R8_E4_THYROID	IVW	3	0.00251454	0.0121373	0.835874
finngen_R8_H8_SUP_OTINAS	IVW	3	-0.0221554	0.107169	0.836219
finngen_R8_G6_HEMIPLE	IVW	3	0.0121001	0.0585311	0.836221
finngen_R8_N14_POSTMENBLEED	IVW	3	0.00774239	0.0375346	0.836577
finngen_R8_DRUGADVERS_CATAR	IVW	3	0.019192	0.0932404	0.836921
finngen_R8_H7_EYELIDINOTH	IVW	3	0.015803	0.07727	0.83795
finngen_R8_AB1_EBV	IVW	3	-0.00977229	0.0478562	0.838196
finngen_R8_I9_ATHSCLE	IVW	3	0.00405341	0.0198898	0.838515
finngen_R8_N14_ACUTERENFAIL	IVW	3	0.0101851	0.0503016	0.839541
finngen_R8_H7_VISUDISTURB	IVW	3	-0.00384877	0.0190446	0.839845
finngen_R8_E4_PCOS_BROAD	IVW	3	-0.00852165	0.0421764	0.839879
finngen_R8_I9_ARTEMBTHRLOW	IVW	3	-0.0148228	0.0736378	0.840469
finngen_R8_H7_MYOPIA	IVW	3	0.00836648	0.0416608	0.840836
finngen_R8_CD2_BENIGN_DUODENUM	IVW	3	-0.0187065	0.0932088	0.840938
finngen_R8_E4_ADDISON	IVW	3	-0.0154549	0.0770624	0.84105
finngen_R8_N14_AMENORRHEAPRIM	IVW	3	0.00996642	0.0497186	0.841123
finngen_R8_O15_DELIV_FORCEP_VAC	IVW	3	0.00807832	0.040486	0.841845
finngen_R8_N14_FIANOV	IVW	3	-0.00964285	0.0484381	0.842204
finngen_R8_J10_LOWERINF	IVW	3	-0.00325677	0.0163609	0.842217
finngen_R8_Q17_ASD	IVW	3	-0.0233363	0.117864	0.84305
finngen_R8_O15_GESTAT_HYPERT	IVW	3	-0.00502211	0.0256791	0.844945
finngen_R8_E4_DM1NEU	IVW	3	-0.0139339	0.0712965	0.845052
finngen_R8_M13_ARTHROSIS_POLY	IVW	3	0.00600344	0.0308432	0.845671
finngen_R8_THROMBOCYTAEMIA	IVW	3	0.017474	0.0899189	0.845917
finngen_R8_G6_ULLNLE	IVW	3	0.00937501	0.0486483	0.847186
finngen_R8_O15_ABORT_MEDICAL	IVW	3	0.00258344	0.0134442	0.847617
finngen_R8_O15_ABORT_UNS	IVW	3	0.0156222	0.0821001	0.849088
finngen_R8_KRA_PSY_ALCOH_EXMORE	IVW	3	-0.00675798	0.0355401	0.849191
finngen_R8_M13_SHORTACHILLES	IVW	3	0.0277551	0.146307	0.849541
finngen_R8_F5_AGORAPHOBIA	IVW	3	-0.0226834	0.119826	0.849855
finngen_R8_I9_OTHARR	IVW	3	0.00453907	0.024028	0.850165
finngen_R8_G6_OTHDEMYEL	IVW	3	0.0137011	0.0727176	0.850551
finngen_R8_KRA_PSY_SPEELING_EXMORE	IVW	3	-0.00911613	0.0488584	0.851988
finngen_R8_N14_MALEINFERT	IVW	3	-0.0146919	0.078816	0.852125
finngen_R8_E4_DMNASNOCOMP	IVW	3	0.00885447	0.0476493	0.852581
finngen_R8_F5_PSYCHDEV	IVW	3	0.0105361	0.056714	0.852621
finngen_R8_K11_GALLBLAOTH	IVW	3	0.0124452	0.0672928	0.853276
finngen_R8_M13_TIETZE	IVW	3	0.0142827	0.0776857	0.85413
finngen_R8_J10_LOWCHRON	IVW	3	-0.00181476	0.00993265	0.855029
finngen_R8_ALCOPANCCHRON	IVW	3	0.00988981	0.0542218	0.855272
finngen_R8_BACT_INTEST_INFECTION_NOS	IVW	3	0.0142882	0.0785159	0.855599
finngen_R8_M13_MUSCLEDISNAS	IVW	3	-0.0264606	0.14568	0.855869
finngen_R8_H7_HYPERMETRO	IVW	3	0.0181993	0.100597	0.856437
finngen_R8_F5_SCHIZOTYP	IVW	3	-0.0157473	0.0870524	0.85645
finngen_R8_C3_BREAST_HERNEG_EXALLC	IVW	3	-0.00600865	0.0334226	0.857327
finngen_R8_K11_EMBED_TEETH_INCLAVO	IVW	3	0.00935508	0.0521426	0.857613
finngen_R8_I9_ANGINA	IVW	3	0.00262723	0.0146899	0.858059
finngen_R8_DM_RETINA_NOS	IVW	3	-0.00707034	0.0396438	0.858451
finngen_R8_U22_COVID19_CONFIRMED	IVW	3	-0.0185898	0.104455	0.858747
finngen_R8_CD2_BENIGN_CONNECTIVE_SOFT	IVW	3	-0.0100775	0.0569094	0.859445
finngen_R8_L12_LICHENSIMPLEX	IVW	3	0.0138219	0.0781797	0.859668
finngen_R8_N14_FEMALEGENINF	IVW	3	-0.00290075	0.0164147	0.859731
finngen_R8_L12_URTICA_ALLERG	IVW	3	-0.00964581	0.0547827	0.860236
finngen_R8_N14_GLOMERULAR	IVW	3	0.00615052	0.0350335	0.860639
finngen_R8_AB1_SYPHILIS	IVW	3	-0.0158123	0.0905406	0.86136
finngen_R8_E4_DM1OPTH	IVW	3	0.00872457	0.0500364	0.861579
finngen_R8_H7_PTOSIS	IVW	3	0.0076211	0.0445162	0.864068
finngen_R8_K11_OTHPERITON	IVW	3	0.0108707	0.0637643	0.864631
finngen_R8_K11_GINGIVITIS_PERIODONTAL	IVW	3	0.00158277	0.00929448	0.864781
finngen_R8_RHINITIS_VASOMOTOR	IVW	3	0.00881341	0.0519801	0.865361
finngen_R8_Q17_OTHER_CONGEN_MALFO	IVW	3	0.0106786	0.0633183	0.866072
finngen_R8_M13_BONEDISNAS	IVW	3	0.0138806	0.0826934	0.866696
finngen_R8_E4_METABOLIA	IVW	3	-0.00188589	0.0112435	0.866795
finngen_R8_D3_HAEMOLYTICANAEMIA	IVW	3	-0.0131422	0.0792608	0.868307
finngen_R8_K11_BILIAOTH	IVW	3	-0.013393	0.0811813	0.868962
finngen_R8_I9_ABAORTANEUR	IVW	3	-0.0110945	0.0674569	0.869362
finngen_R8_ST19_FRACT_LUMBAR_SPINE_PELVIS	IVW	3	0.00729789	0.0444966	0.869723
finngen_R8_I9_ARTEMBTHRNAS	IVW	3	0.0132369	0.0807187	0.869741
finngen_R8_N14_VAGINITIS	IVW	3	-0.00588832	0.0362145	0.870837
finngen_R8_M13_SHOULDERNAS	IVW	3	0.00744512	0.0458686	0.871058
finngen_R8_E4_HYPOPIT	IVW	3	-0.0124938	0.0780776	0.872867
finngen_R8_F5_OTHPER	IVW	3	0.00675556	0.0422414	0.872938
finngen_R8_AB1_CHOLERA	IVW	3	0.0171032	0.108379	0.874608
finngen_R8_F5_SCHIZPER	IVW	3	0.0152177	0.0966408	0.874877
finngen_R8_H7_BINOCUMOVOTH	IVW	3	0.015208	0.097201	0.875671
finngen_R8_I9_CEREBDOTH	IVW	3	0.0115168	0.0738639	0.876097
finngen_R8_N14_HYDRONEPHR	IVW	3	-0.00640254	0.0411309	0.876299
finngen_R8_E4_MINERAL_MET	IVW	3	0.0162211	0.104598	0.876758
finngen_R8_E4_FH_IHD	IVW	3	0.00906444	0.0585422	0.876951
finngen_R8_AB1_CHLAMYDIA_OTHER	IVW	3	0.0085434	0.0570801	0.881022
finngen_R8_OSTEOPOROSIS_FRACTURE_FG	IVW	3	0.00874711	0.0584764	0.881093
finngen_R8_K11_DIAHER	IVW	3	0.00326104	0.0219656	0.881979
finngen_R8_M13_RECUDISLOCATIO	IVW	3	0.00703854	0.0487485	0.885197
finngen_R8_N14_RENFAILNAS	IVW	3	0.00697408	0.0490083	0.88684
finngen_R8_E4_GRAVES_STRICT	IVW	3	0.00612206	0.0431051	0.887059
finngen_R8_M13_HYPERMOBILITY	IVW	3	-0.011833	0.0841362	0.888153
finngen_R8_M13_CHRONDROPATHIES	IVW	3	0.00724855	0.0517923	0.888696
finngen_R8_I9_UAP	IVW	3	-0.00329767	0.0236272	0.888999
finngen_R8_KRA_PSY_CHILDOTH_EXMORE	IVW	3	0.00907082	0.0651036	0.88919
finngen_R8_ALCOPANCACU	IVW	3	-0.0103637	0.0755444	0.890884
finngen_R8_M13_PLANTARFASC	IVW	3	0.00606574	0.0443813	0.891289
finngen_R8_H7_EYELIDINFLAMMATION	IVW	3	-0.00558818	0.0410761	0.891786
finngen_R8_N14_MALEGEN	IVW	3	0.00176108	0.0129572	0.891888
finngen_R8_N14_CALCUKIDUR	IVW	3	0.00313215	0.0238748	0.895625
finngen_R8_I9_VASCSYND	IVW	3	0.00892141	0.0680494	0.895695
finngen_R8_H8_MASTCHRON	IVW	3	-0.0109722	0.0837431	0.895758
finngen_R8_I9_AF_REIMB	IVW	3	-0.00268958	0.0205514	0.895878
finngen_R8_N14_BARTHOABSCESS	IVW	3	-0.0112909	0.0875809	0.897421
finngen_R8_H7_GLAUCOMA_NTG	IVW	3	-0.00672374	0.0523631	0.897828
finngen_R8_H7_VITROTH	IVW	3	-0.00281839	0.0220475	0.898281
finngen_R8_D3_WHITEBLOODCELLNAS	IVW	3	-0.00897201	0.0706586	0.898959
finngen_R8_I9_CVD_HARD	IVW	3	0.00145776	0.011533	0.899416
finngen_R8_ALCOHOLACUTE10	IVW	3	0.00365452	0.0294266	0.901164
finngen_R8_AB1_CANDIDIASIS	IVW	2	0.0105529	0.0871262	0.903595
finngen_R8_E4_ENDOGLAND	IVW	3	-0.00227942	0.0191852	0.905425
finngen_R8_N14_ENDOMETRIOSIS_DEEP	IVW	3	-0.00672735	0.0566868	0.905532
finngen_R8_M13_GIANTCELL	IVW	3	0.00862932	0.0732407	0.906209
finngen_R8_O15_ANTENAT_ABNORM	IVW	3	-0.00622987	0.053245	0.906857
finngen_R8_M13_ENTESOPATHYLOWNAS	IVW	3	-0.00722096	0.0633165	0.909202
finngen_R8_N14_BREAST	IVW	3	-0.00212242	0.0186128	0.909214
finngen_R8_K11_DEPOSITS	IVW	3	0.00587603	0.0527565	0.911315
finngen_R8_C3_LIP_ORAL_PHARYNX_EXALLC	IVW	3	-0.00638544	0.0575034	0.911581
finngen_R8_ST19_FRACT_NECK	IVW	3	0.00662403	0.0605583	0.912899
finngen_R8_L12_PSORI_NAS	IVW	3	0.00610164	0.0566785	0.914271
finngen_R8_C3_PANCREAS_EXALLC	IVW	3	0.00654015	0.0617476	0.915648
finngen_R8_H7_VITRBODYGLOBE	IVW	3	0.00303377	0.0290151	0.916726
finngen_R8_O15_LABOUR_LONG	IVW	3	-0.00533388	0.0512393	0.917092
finngen_R8_SFN	IVW	3	0.0142866	0.13738	0.917175
finngen_R8_AB1_HEPATITIS_OTHER_VIRAL	IVW	3	-0.00552675	0.053709	0.918041
finngen_R8_CD2_BENIGN_MENINGES	IVW	3	0.006614	0.0647486	0.918638
finngen_R8_CHRONOTH	IVW	3	-0.00521564	0.0511344	0.918758
finngen_R8_KRA_PSY_CODUCTEMOT_EXMORE	IVW	3	-0.0101678	0.100313	0.919264
finngen_R8_M13_LATERALEPICOND	IVW	2	0.00985545	0.0979076	0.91982
finngen_R8_C3_OVARY_EXALLC	IVW	3	0.00611882	0.0614913	0.920736
finngen_R8_E4_THYTOXGOITDIF	IVW	3	0.0034417	0.0348868	0.921414
finngen_R8_NECROVASC_FG	IVW	3	0.00549941	0.0563746	0.922289
finngen_R8_O15_LABOUR_FETAL_STRESS	IVW	3	0.00258873	0.0267361	0.922865
finngen_R8_K11_VASCINT	IVW	3	0.00522131	0.0553774	0.924882
finngen_R8_H7_KERATOCONUS	IVW	3	0.0095955	0.102958	0.925746
finngen_R8_F5_DISSOCIATIVE	IVW	3	0.0064128	0.0688265	0.925766
finngen_R8_L12_SKINSUBCUTISNAS	IVW	3	-0.00487781	0.0524317	0.925878
finngen_R8_ALLERG_RHINITIS	IVW	3	-0.00303115	0.032673	0.926084
finngen_R8_H7_RETINOCHISISCYST	IVW	3	0.00883744	0.0953946	0.926189
finngen_R8_CD2_BENIGN_MOUTH_NOS	IVW	3	0.00820475	0.0895922	0.927033
finngen_R8_M13_MUSCLESTRAIN	IVW	3	-0.00900879	0.0989114	0.927429
finngen_R8_RX_RHEUMA_BIOLOGICAL	IVW	3	-0.00338196	0.0372991	0.927754
finngen_R8_E4_GRAVES_OPHT_STRICT	IVW	3	-0.0218497	0.243824	0.928595
finngen_R8_J10_SIMPLBRONCH	IVW	3	-0.00859026	0.0979077	0.930085
finngen_R8_M13_DORSALGIA	IVW	2	0.000986839	0.011275	0.930254
finngen_R8_G6_MERALGIA	IVW	3	-0.0070208	0.0804221	0.930434
finngen_R8_K11_PARODON_PERIAPIC_CHRONIC	IVW	3	-0.00254559	0.0294893	0.93121
finngen_R8_H7_RETINALBREAK	IVW	3	-0.0030471	0.0353471	0.931303
finngen_R8_L12_FOLLICULARNAS	IVW	3	0.00648697	0.0754215	0.931459
finngen_R8_J10_BRONCHITIS	IVW	3	-0.00213041	0.0256641	0.933843
finngen_R8_L12_ACTINKERA	IVW	3	0.00207115	0.0251334	0.934324
finngen_R8_K11_CHRONPANC	IVW	3	-0.0032844	0.0399332	0.93445
finngen_R8_CD2_BENIGN_MENINGES_CEREBRAL	IVW	3	0.00503476	0.0614282	0.934677
finngen_R8_O15_LABOUR_OTHER	IVW	3	-0.00514578	0.0643204	0.936235
finngen_R8_M13_SHOULDER	IVW	3	0.00106536	0.0133334	0.936315
finngen_R8_H7_IRIDONAS	IVW	3	-0.00578011	0.0728224	0.936736
finngen_R8_F5_PANIC	IVW	3	-0.003111	0.0394762	0.937186
finngen_R8_Q17_OTHER_CONGEN_MALFO_FACE_NECK	IVW	3	0.00632769	0.0811382	0.937839
finngen_R8_AB1_VIRAL_HEPATITIS	IVW	3	0.00382244	0.0492846	0.938179
finngen_R8_L12_OTHACUSKINSUN	IVW	3	-0.00683429	0.0888822	0.93871
finngen_R8_CD2_BENIGN_EAR_RESP	IVW	3	-0.0065311	0.0856713	0.939233
finngen_R8_K11_ORAL_LEUCOPLACIA_INCLAVO	IVW	3	0.00644391	0.0883213	0.941838
finngen_R8_L12_OTHPIGMENTATION	IVW	3	0.00524379	0.0760635	0.945038
finngen_R8_N14_OTHNONINFVULV	IVW	3	-0.00319679	0.0465285	0.945224
finngen_R8_AB1_PEDICULOSIS_ACARIASIS_OTHERINFEST	IVW	3	-0.00404634	0.05933	0.945626
finngen_R8_E4_OVARDYS	IVW	3	0.00358306	0.0528635	0.945961
finngen_R8_I9_AF	IVW	3	0.00108427	0.016035	0.946089
finngen_R8_Q17_OTHER_CONGEN_MALFO_SKIN	IVW	3	-0.00461609	0.0684732	0.946252
finngen_R8_H7_GLAUCNAS	Wald ratio	1	0.00440886	0.0654335	0.94628
finngen_R8_ULCERNAS	IVW	3	-0.0023033	0.0348031	0.947234
finngen_R8_K11_COELIAC	IVW	3	-0.00249645	0.0382034	0.947898
finngen_R8_E4_DM2REN	IVW	3	-0.00294861	0.0452031	0.947991
finngen_R8_N14_INFLUTH	IVW	3	-0.00230132	0.0356064	0.948467
finngen_R8_N14_OBSTRUREFLUROPATH	IVW	3	-0.00235603	0.037775	0.950268
finngen_R8_H8_OTOSCLE	IVW	3	0.00396682	0.0636694	0.950321
finngen_R8_GRAVES_OPHT	IVW	3	-0.0129804	0.214431	0.95173
finngen_R8_K11_OTHGASTR	IVW	3	0.00157063	0.0269181	0.953471
finngen_R8_VWXY20_SUICI_OTHER_INTENTI_SELF_H	IVW	3	-0.00342405	0.0589161	0.953655
finngen_R8_RX_CROHN_2NDLINE	IVW	3	-0.000929464	0.0170292	0.956473
finngen_R8_SCND_OTH_KNEEARTHROSIS	IVW	3	0.00343839	0.063974	0.957137
finngen_R8_KRA_PSY_ANYMENTAL_SUICID_PREG_NERV_EXMORE	IVW	3	-0.00218647	0.0418064	0.95829
finngen_R8_H8_EXT_OTH	IVW	3	-0.00283706	0.0570311	0.960325
finngen_R8_BRONCHITIS	IVW	3	0.000692935	0.0140585	0.960689
finngen_R8_E4_HYTHY_AI_STRICT	IVW	3	-0.000659363	0.0136616	0.961506
finngen_R8_AB1_ZOSTER	IVW	3	-0.00162438	0.0336928	0.961548
finngen_R8_M13_DORSALGIANAS	IVW	3	-0.00106885	0.0225427	0.962183
finngen_R8_RHEUMA_OTHER_WIDE	IVW	3	0.00140915	0.0297497	0.962221
finngen_R8_O15_BIRTH_BREAT_INFECT	IVW	3	0.0033826	0.0757047	0.964361
finngen_R8_F5_MANIA	IVW	3	0.00343089	0.0770495	0.964483
finngen_R8_M13_CERVICALGIA	IVW	3	-0.00125704	0.0288171	0.965206
finngen_R8_L12_LICHENPLANUS_INCLAVO	IVW	3	-0.00143073	0.0332311	0.965659
finngen_R8_I9_LYMPHOTH	IVW	3	0.00355415	0.0826398	0.965695
finngen_R8_G6_DYSTON	IVW	3	0.00250748	0.0598414	0.966577
finngen_R8_Q17_CONGEN_MALFO_URINARY_SYSTEM	IVW	3	0.00237423	0.0578186	0.967245
finngen_R8_F5_BIPO	IVW	3	0.00113638	0.0298691	0.969652
finngen_R8_L12_OTHERDISSKINANDSUBCUTIS	IVW	3	0.00126896	0.0353478	0.971363
finngen_R8_H8_OTALGIA	IVW	3	-0.00178826	0.0529419	0.973054
finngen_R8_H8_OTHHEARINGLOSS	IVW	3	0.0010486	0.0322018	0.974023
finngen_R8_SLEEP	IVW	3	0.000385409	0.0119522	0.974276
finngen_R8_I9_AORTANEUR	IVW	3	0.00125297	0.0401593	0.97511
finngen_R8_M13_PATELLAOTH	IVW	2	0.000969611	0.0311929	0.975202
finngen_R8_H8_EXTERNAL	IVW	3	0.000704286	0.0237799	0.976373
finngen_R8_M13_SPINENTHES	IVW	3	0.00196862	0.067744	0.976817
finngen_R8_DENTAL_TMD_FIBRO	IVW	3	0.000688468	0.0249659	0.978
finngen_R8_CD2_BENIGN_PAROTID	IVW	3	0.00178132	0.0726185	0.98043
finngen_R8_H8_OTIMEDNAS	IVW	3	-0.00113162	0.0468924	0.980747
finngen_R8_N14_POLYPFEMGEN	IVW	3	-0.000448572	0.0209733	0.982936
finngen_R8_ERECTILE_DYSFUNCTION	IVW	3	0.00144515	0.06965	0.983446
finngen_R8_DM_HYPOGLYC	IVW	3	-0.000472625	0.0281656	0.986612
finngen_R8_I9_VASCDEM	IVW	2	-0.000881166	0.0529514	0.986723
finngen_R8_CD2_BENIGN_ADRENAL	IVW	3	0.00112018	0.0694895	0.987139
finngen_R8_L12_NAILDIS	IVW	2	0.000795055	0.0518901	0.987775
finngen_R8_VIRALPNEUMONAS	IVW	3	0.00117287	0.086493	0.989181
finngen_R8_K11_APHTA_RECUR_INCLAVO	IVW	3	-0.000878297	0.064989	0.989217
finngen_R8_H7_PRESBYOPIA	IVW	3	0.000954917	0.071731	0.989378
finngen_R8_C3_STOMACH_EXALLC	IVW	3	0.00114179	0.0899	0.989867
finngen_R8_N14_URETHRITISANDURSYNDR	IVW	2	0.00216366	0.176011	0.990192
finngen_R8_L12_DERMATITISECZEMA	IVW	3	0.000145589	0.0121988	0.990478
finngen_R8_NAFLD	IVW	3	-0.00091259	0.0777613	0.990636
finngen_R8_Q17_CYSTIC_KIDNEY_DISEA	IVW	3	0.000904046	0.0781035	0.990765
finngen_R8_O15_PLAC_PRAEVIA	IVW	3	-0.000664494	0.0665921	0.992038
finngen_R8_N14_LUMPNASBREAST	IVW	3	-0.000338662	0.0341394	0.992085
finngen_R8_H7_VERTISTRAB	IVW	3	0.000775537	0.0786467	0.992132
finngen_R8_E4_HYPERLIPMIX	IVW	3	0.000671608	0.0708902	0.992441
finngen_R8_M13_PANNICULITIS	IVW	3	-0.00049778	0.0690408	0.994247
finngen_R8_H7_RETINOPATHYDIAB	IVW	3	0.0001913	0.0287503	0.994691
finngen_R8_M13_TEMPARTERIT	IVW	3	0.000309735	0.0773454	0.996805
finngen_R8_I9_THAORTANEUR	IVW	3	0.000139445	0.0370157	0.996994
finngen_R8_O15_OTHER_MATERN_DIS_ELSEWHERE	IVW	3	-0.000151397	0.0412315	0.99707
finngen_R8_G6_EPLEPSY	IVW	3	5.01516e-05	0.0218003	0.998164
finngen_R8_K11_MIH_INCLAVO	IVW	3	0.000155541	0.0979149	0.998733
finngen_R8_AB1_OTHER_INFECTIONS	Wald ratio	1	8.13287e-05	0.053749	0.998793
finngen_R8_F5_KELAMENT	IVW	3	8.50627e-06	0.0252507	0.999731
finngen_R8_K11_OTHFUNC	IVW	3	-2.32486e-06	0.0204548	0.999909

## Sheet: IDO1
Bonferroni correction pval < 3.20E-06 (0.05/1421/11)
IDO1
Diseases	method	nsnp	b	se	pval
finngen_R8_FE_MODE	IVW	4	0.407457	0.0259992	2.35246e-55
finngen_R8_CD2_BENIGN_SIGMOID_COLON	IVW	4	0.189965	0.0143267	3.9752e-40
finngen_R8_O15_PUERP_INFECT_OTHER	IVW	4	0.199768	0.0235046	1.91064e-17
finngen_R8_G6_OTHDEMYEL	IVW	4	-0.447021	0.0590157	3.60195e-14
finngen_R8_H7_CORNEALSCAR	IVW	4	0.494022	0.0701282	1.8606e-12
finngen_R8_AB1_PEDICULOSIS_ACARIASIS_OTHERINFEST	IVW	4	0.125032	0.0181788	6.07266e-12
finngen_R8_COPD_MODE	IVW	4	-0.0437185	0.00668404	6.12184e-11
finngen_R8_G6_NEUINFL	IVW	4	-0.254924	0.0417718	1.0424e-09
finngen_R8_RHINITIS_VASOMOTOR	IVW	4	0.253724	0.044464	1.15471e-08
finngen_R8_N14_CERVICAL_HSIL	IVW	4	0.0189708	0.00334684	1.4424e-08
finngen_R8_N14_FEMALE_GENITAL_HSIL	IVW	4	0.0549564	0.009726	1.60021e-08
finngen_R8_F5_GAD	IVW	4	-0.124361	0.0220514	1.70443e-08
finngen_R8_CD2_BENIGN_ENDOCRINE_OTH	IVW	4	-0.159586	0.0291935	4.58971e-08
finngen_R8_CD2_BENIGN_HEAMANGIOMA_LYMPHANGIOMA	IVW	4	0.27952	0.0514328	5.49018e-08
finngen_R8_H7_CONJUNCTDEGDEPOT	IVW	4	-0.447856	0.0841402	1.02223e-07
finngen_R8_Q17_OTHER_CONGEN_MALFO_DIGES_SYSTEM1	IVW	4	0.405223	0.0762683	1.07761e-07
finngen_R8_AB1_VIRAL_SKIN_NOS	IVW	4	0.309169	0.0593355	1.88303e-07
finngen_R8_M13_PANNICULITIS	IVW	4	-0.302288	0.0599982	4.6972e-07
finngen_R8_K11_PULPITIS_3	IVW	4	-0.182927	0.0366335	5.93136e-07
finngen_R8_F5_DELIRIUM	IVW	4	-0.195493	0.0409007	1.75553e-06
finngen_R8_F5_ALCOHOLAC	IVW	4	0.0975738	0.0207966	2.70802e-06
finngen_R8_D3_BLOODOTHER	IVW	4	-0.0429158	0.00940241	5.01059e-06
finngen_R8_K11_ATTRITION	IVW	4	-0.346439	0.0784669	1.00963e-05
finngen_R8_CD2_BENIGN_ASCENDING_COLON	IVW	4	-0.116592	0.0268232	1.38206e-05
finngen_R8_M13_SPONTRUPTSYNOTEND	IVW	4	-0.238642	0.0553626	1.62869e-05
finngen_R8_G6_BRACHPLE	IVW	4	-0.210946	0.0489991	1.66914e-05
finngen_R8_J10_EXTERLUNG	IVW	4	-0.099704	0.0234705	2.15632e-05
finngen_R8_H7_VITROTH	IVW	4	-0.0900621	0.0217329	3.41222e-05
finngen_R8_E4_DM1REN	IVW	4	-0.15772	0.0385441	4.27813e-05
finngen_R8_M13_SHOULDER	IVW	4	-0.0587062	0.0144363	4.7711e-05
finngen_R8_RX_RHEUMA_BIOLOGICAL	IVW	4	-0.0993535	0.0247727	6.05635e-05
finngen_R8_G6_PARDIPLE	IVW	4	0.330654	0.0825317	6.16559e-05
finngen_R8_I9_VASCSYND	IVW	4	-0.350873	0.089083	8.19173e-05
finngen_R8_AB1_VIRAL_WARTS	IVW	4	-0.0536347	0.013953	0.000121064
finngen_R8_L12_FOLLICULARCYST	IVW	4	0.0650092	0.0169865	0.000129654
finngen_R8_J10_NASALPOLYP	IVW	4	0.0660701	0.0172984	0.000133758
finngen_R8_M13_OTHERBONE	IVW	4	-0.067485	0.0180276	0.000181521
finngen_R8_CD2_BENIGN_SKIN	IVW	4	-0.0475443	0.012716	0.000184809
finngen_R8_CD2_BENIGN_EYE	IVW	4	-0.170448	0.0460489	0.000214365
finngen_R8_RX_CROHN_1STLINE	IVW	4	-0.0553187	0.0150878	0.000245935
finngen_R8_I9_ARTEMBTHRLOW	IVW	4	0.241195	0.0659859	0.000256924
finngen_R8_N14_ABNORMALBLEED	IVW	4	0.0640828	0.0177173	0.000298078
finngen_R8_K11_OTHINFLIV	IVW	4	-0.311346	0.0878593	0.000394572
finngen_R8_AB1_VARICELLA	IVW	4	-0.378613	0.106888	0.000396893
finngen_R8_CD2_BENIGN_CONJUNCTIVA	IVW	4	-0.52306	0.154416	0.000705719
finngen_R8_PDSTRICT_EXMORE	IVW	4	-0.248527	0.0746951	0.00087716
finngen_R8_M13_OSTEOCHONDROPATHY	IVW	4	-0.273031	0.0824992	0.000934648
finngen_R8_M13_RHEUMATISM	IVW	4	-0.047017	0.0142723	0.000986746
finngen_R8_O15_DELIV_SPONT	IVW	4	-0.0451734	0.0137841	0.00104841
finngen_R8_L12_PSORIASIS	IVW	4	-0.0796759	0.0244421	0.00111495
finngen_R8_E4_ENDODISNAS	IVW	4	0.216415	0.0664553	0.00112772
finngen_R8_CD2_BENIGN_HEMANGIOMA	IVW	4	0.271148	0.0854404	0.00150596
finngen_R8_ALLERGIC_CONTACT_DERMA_DRUGS_CONTACT_W_SKIN	IVW	4	0.478314	0.152072	0.00165916
finngen_R8_O15_ABORT_UNS	IVW	4	-0.200146	0.063802	0.00170691
finngen_R8_AB1_SCABIES	IVW	4	0.226207	0.0725361	0.00181748
finngen_R8_AB1_OTHER_INFECTIONS	IVW	4	0.154585	0.0499073	0.00195202
finngen_R8_F5_PERSMOOD	IVW	4	0.0987169	0.0320395	0.00206236
finngen_R8_RX_CROHN_2NDLINE	IVW	4	-0.0368269	0.0119716	0.00209665
finngen_R8_K11_ACUTPANC	IVW	4	0.091738	0.0298613	0.00212534
finngen_R8_CD2_BENIGN_URINARY	IVW	4	0.416865	0.136284	0.00222227
finngen_R8_HYPOTHY_REIMB	IVW	4	-0.0827631	0.0271568	0.00230673
finngen_R8_N14_IGA_NEPHROPATHY	IVW	4	-0.239073	0.0790859	0.00250319
finngen_R8_O15_AMNIOT_OTHER	IVW	4	0.0616085	0.0204836	0.0026324
finngen_R8_N14_CERVICAL_LSIL	IVW	4	0.181422	0.0604801	0.00270252
finngen_R8_F5_EMOPER	IVW	4	0.206325	0.0688311	0.00272155
finngen_R8_N14_FEMALE_GENITAL_DYSPLASIA_ALL	IVW	4	0.111996	0.0376872	0.0029612
finngen_R8_H8_HL_CON_NAS	IVW	4	-0.237587	0.08022	0.00305952
finngen_R8_N14_CERVICAL_DYSPLASIA_ALL	IVW	4	0.0833592	0.0284242	0.00336044
finngen_R8_K11_MN_RETRGN	IVW	4	-0.17231	0.0589215	0.00345129
finngen_R8_K11_APPENDECTOMY	IVW	4	-0.0187799	0.00642874	0.0034863
finngen_R8_I9_OTHINTRACRA	IVW	3	-0.636757	0.218196	0.00351963
finngen_R8_M13_THORACISPINEPAIN	IVW	4	-0.155325	0.0535168	0.00370374
finngen_R8_C3_ENDOCRINE_EXALLC	IVW	4	-0.0609763	0.0212447	0.00410228
finngen_R8_E4_DM1NEU	IVW	4	0.207622	0.0723851	0.00412694
finngen_R8_D3_OTHERWHITECELL	IVW	4	0.13647	0.0476195	0.00415886
finngen_R8_H7_DIVERGSTRAB	IVW	4	-0.277429	0.0969721	0.00422417
finngen_R8_DM_HYPOGLYC	IVW	4	0.104065	0.0366403	0.00450893
finngen_R8_M13_BONEDENSOTH	IVW	4	-0.383458	0.135352	0.00461081
finngen_R8_N14_GLOMERULAR	IVW	4	-0.10921	0.0385503	0.00461241
finngen_R8_M13_DEFORMDORSO	IVW	4	-0.0800882	0.0283876	0.00478384
finngen_R8_H8_OTHHEARINGLOSS	IVW	4	-0.0757388	0.027072	0.00514702
finngen_R8_J10_PNEUMONONBACT	IVW	4	0.467649	0.167538	0.00524953
finngen_R8_H8_MED_SUPP	IVW	4	-0.0738966	0.0266581	0.00557114
finngen_R8_D3_WHITEBLOODCELLNAS	IVW	4	0.134478	0.0487067	0.0057628
finngen_R8_H8_VESTIBNEUR	IVW	4	0.211985	0.0772331	0.00605574
finngen_R8_E4_DM2COMA	IVW	4	0.118051	0.0432789	0.00637811
finngen_R8_ALCOPANCACU	IVW	4	-0.266937	0.0983554	0.00664746
finngen_R8_I9_ICH	IVW	4	0.152387	0.056556	0.00705066
finngen_R8_G6_POSTOPNEURO	IVW	4	-0.164384	0.0610307	0.00707126
finngen_R8_H7_VITRBODYGLOBE	IVW	4	-0.0686271	0.0255308	0.00718777
finngen_R8_H8_SUP_ACUTE	IVW	4	-0.107106	0.0399285	0.00730875
finngen_R8_F5_MANIA	IVW	4	-0.320341	0.119609	0.00740136
finngen_R8_H8_PERFORATION	IVW	4	-0.222515	0.0832386	0.00751262
finngen_R8_D3_ALLERGPURPURA	IVW	4	0.176546	0.0670931	0.00850436
finngen_R8_CD2_BENIGN_PITUITARY_CRANIPHAR	IVW	4	-0.254262	0.0966818	0.00854133
finngen_R8_K11_GINGIVA	IVW	4	-0.239208	0.0910419	0.0086026
finngen_R8_N14_HYDRONEPHR	IVW	4	-0.0626778	0.0238884	0.00869618
finngen_R8_AB1_SYPHILIS	IVW	4	-0.157791	0.0607343	0.00937526
finngen_R8_K11_CROWDI_TEETH_INCLAVO	IVW	4	-0.271898	0.104715	0.00941668
finngen_R8_M13_ARTHROSIS_KNEE_PRIM_KNEESURG	IVW	4	-0.109272	0.0421617	0.00954902
finngen_R8_RX_N05C	IVW	4	0.0242015	0.0093646	0.00975598
finngen_R8_RHEU_ARTHRITIS_OTH	IVW	4	-0.0873898	0.0338743	0.00988492
finngen_R8_G6_NERPLEX	IVW	4	0.0221494	0.00864834	0.0104336
finngen_R8_TEMPOROMANDIB_INCLAVO	IVW	4	-0.0353367	0.0138314	0.0106243
finngen_R8_M13_CHRONDROPATHIES	IVW	4	-0.0650866	0.0255548	0.0108671
finngen_R8_I9_RBBB	IVW	4	0.255392	0.101048	0.0114897
finngen_R8_E4_ENDOMETPOSTOP	IVW	4	-0.168481	0.0667237	0.0115679
finngen_R8_N14_NEUROMUSCDYSBLADD	IVW	4	0.0786748	0.0311721	0.0116065
finngen_R8_H7_STENOLACRI	IVW	4	0.25618	0.101734	0.011798
finngen_R8_G6_PARKINSON	IVW	4	-0.186635	0.0743115	0.0120213
finngen_R8_N14_PHIMOSIS	IVW	4	0.158932	0.0641369	0.0132118
finngen_R8_K11_ANOMALI_DENTAL_ARCH_RELATIONS1_INCLAVO	IVW	4	-0.0920483	0.0371943	0.0133311
finngen_R8_O15_PREG_OTHER_MAT_DISORD	IVW	4	-0.0497914	0.0202363	0.0138745
finngen_R8_ASTHMA_OPPORTUNIST_INFECTIONS	IVW	4	-0.363717	0.148276	0.0141681
finngen_R8_AB1_INTESTINAL_INFECTIONS	IVW	4	-0.0180051	0.00739169	0.0148564
finngen_R8_N14_RENFAILNAS	IVW	3	-0.269924	0.111184	0.0151936
finngen_R8_O15_MATERN_CARE_OTHER	IVW	4	-0.0861782	0.03552	0.0152585
finngen_R8_AB1_OTHER_VIRAL	IVW	4	0.139624	0.0576312	0.0154047
finngen_R8_I9_INTRACRA	IVW	4	0.123711	0.0517277	0.0167762
finngen_R8_L12_PSORI_PUSTUPALM	IVW	4	-0.272712	0.114406	0.0171388
finngen_R8_M13_SOFTTISSUE	IVW	4	-0.0317586	0.0133426	0.0173012
finngen_R8_ST19_FRACT_LOWER_LEG_INCLU_ANKLE	IVW	4	-0.0253936	0.0106745	0.0173644
finngen_R8_I9_HYPTENSEC	IVW	4	-0.151758	0.0640998	0.0179075
finngen_R8_C3_STOMACH_EXALLC	IVW	4	-0.244455	0.103515	0.0181991
finngen_R8_G6_POLYOTHUNS	IVW	4	-0.125179	0.0532767	0.0187938
finngen_R8_H8_HL_PRESBY	IVW	4	-0.0815021	0.0347377	0.0189654
finngen_R8_L12_DERM_NUMMULAR	IVW	4	0.26673	0.113957	0.0192516
finngen_R8_E4_DM2PERIPH	IVW	4	0.204775	0.0877433	0.0196062
finngen_R8_O15_ABORT_MEDICAL	IVW	4	-0.0388062	0.0166355	0.0196621
finngen_R8_K11_PANCOTH	IVW	4	0.286703	0.123225	0.0199834
finngen_R8_G6_CPETAL	IVW	4	0.129562	0.0563543	0.021502
finngen_R8_J10_BRONCHIECTASIS	IVW	4	-0.201747	0.0879532	0.0218019
finngen_R8_K11_DEEP_BITE_INCLAVO	IVW	4	-0.103947	0.0454177	0.0220975
finngen_R8_H8_BPV	IVW	4	0.025226	0.0110387	0.0222984
finngen_R8_N14_DIALYSIS	IVW	4	-0.294477	0.128983	0.0224263
finngen_R8_AB1_RUBELLA	IVW	2	0.41593	0.182224	0.0224587
finngen_R8_L12_PAPULOSQUAMOUS	IVW	4	-0.0832724	0.0365116	0.0225656
finngen_R8_C_STROKE	IVW	4	0.0163428	0.00717009	0.0226494
finngen_R8_AB1_VIRAL_NOS	IVW	4	0.130486	0.0572889	0.0227458
finngen_R8_H8_CHRON_SUPOTITIS	IVW	4	-0.107415	0.0474858	0.023694
finngen_R8_I9_THROMBOTH	IVW	4	-0.127598	0.0565093	0.0239457
finngen_R8_I9_CEREBDOTH	IVW	4	-0.344976	0.154281	0.0253497
finngen_R8_N14_FEMALE_GENITAL_LSIL	IVW	4	0.21035	0.0942565	0.0256364
finngen_R8_H8_PERIPHVERTIGO	IVW	4	-0.197627	0.0888137	0.0260689
finngen_R8_N14_CHRONKIDNEYDIS	IVW	4	-0.104114	0.0469442	0.0265671
finngen_R8_M13_ARTHTROSIS_COX	IVW	4	-0.0426096	0.0192671	0.0269995
finngen_R8_K11_OTHDIG	IVW	4	0.0449012	0.0203974	0.0277135
finngen_R8_O15_HAEMORRH_EARLY_PREG	IVW	4	-0.126694	0.0575762	0.0277748
finngen_R8_L12_LYMPHADENITIS	IVW	4	-0.195123	0.0887825	0.0279657
finngen_R8_AB1_CANDIDIASIS	IVW	4	0.0714192	0.0324987	0.0279772
finngen_R8_N14_OTHETNASKIDUR	IVW	4	0.142919	0.0650489	0.0280136
finngen_R8_E4_DM1OPTH	IVW	4	0.0647832	0.0295046	0.0281135
finngen_R8_H7_RETINOCHISISCYST	IVW	4	-0.459656	0.211293	0.0295974
finngen_R8_J10_BRONCH	IVW	4	-0.166964	0.0770949	0.030335
finngen_R8_I9_HYPTENSESS	IVW	4	-0.0207494	0.00960661	0.0307799
finngen_R8_C3_LIP_ORAL_PHARYNX_EXALLC	IVW	4	0.190432	0.0882649	0.0309667
finngen_R8_N14_ENDOMETRIOSIS_NOS	IVW	4	0.0935921	0.043665	0.0320799
finngen_R8_D3_ITP	IVW	4	-0.202067	0.0945001	0.0324942
finngen_R8_M13_BONEDISNAS	IVW	4	-0.0567421	0.0265486	0.0325744
finngen_R8_J10_PLEUREFFUSION	IVW	3	-0.20911	0.0980654	0.032978
finngen_R8_AB1_CHOLERA	IVW	4	0.349996	0.164986	0.0338904
finngen_R8_COPD_EARLY	IVW	4	-0.0844664	0.0399125	0.0343202
finngen_R8_O15_RETAINED_PLAC_MEMB_NO_HEAMORRH	IVW	4	0.208125	0.0991792	0.0358638
finngen_R8_H8_CHOLEASTOMA	IVW	4	-0.134091	0.0641285	0.0365301
finngen_R8_C3_MENINGIOMA_EXALLC	IVW	4	-0.183483	0.0877626	0.0365569
finngen_R8_D3_ACQHAEMOLYTICANAEMIA	IVW	4	0.281239	0.135838	0.0384155
finngen_R8_E4_OBESITY	IVW	4	-0.0546251	0.0263994	0.0385289
finngen_R8_H7_CATARACTOTHER	IVW	4	0.0597742	0.0289264	0.0387882
finngen_R8_MACULAR_PUCKER	IVW	4	0.0543735	0.0264081	0.039497
finngen_R8_N14_GLOMER_NEPHRITIS	IVW	4	-0.232144	0.113086	0.0400902
finngen_R8_I9_PULMEMB	IVW	4	0.0662047	0.0322995	0.0403922
finngen_R8_E4_PCOS_CONCORTIUM	IVW	4	0.0380481	0.0185769	0.0405456
finngen_R8_G6_MENINGBACT	IVW	4	-0.325228	0.159344	0.0412463
finngen_R8_K11_HERING	IVW	4	-0.0456	0.0223626	0.0414379
finngen_R8_J10_RESPOTHER	IVW	4	0.0833285	0.0412342	0.0432945
finngen_R8_J10_ACUTELOWERNAS	IVW	4	-0.0620845	0.0307797	0.0436895
finngen_R8_F5_BULIMIA	IVW	4	-0.163027	0.0813706	0.0451226
finngen_R8_F5_MIXPER	IVW	4	0.24127	0.120504	0.0452666
finngen_R8_G6_FEMLAPOP	IVW	4	0.158888	0.0797559	0.0463507
finngen_R8_N14_ACUTENEPHRITIC	IVW	4	-0.460688	0.231777	0.0468516
finngen_R8_L12_OTHPIGMENTATION	IVW	4	-0.169479	0.0852843	0.0468975
finngen_R8_ULCERNAS	IVW	4	-0.0548183	0.027615	0.0471341
finngen_R8_N14_OTHNONINFOVA	IVW	4	-0.235789	0.119087	0.0477062
finngen_R8_D3_ANAEMIA_IRONDEF_BLOODLOSS	IVW	4	0.116298	0.0589218	0.0484084
finngen_R8_M13_CERVICDISC	IVW	4	-0.0348697	0.0177458	0.0494197
finngen_R8_F5_SEDAHYP	IVW	4	0.200809	0.102198	0.0494258
finngen_R8_GENERALI_SKIN_ERUPT_DRUGS_MEDICAM	IVW	4	-0.211244	0.108244	0.0509909
finngen_R8_M13_ROTATORCUFF	IVW	4	-0.0941465	0.0482798	0.0511739
finngen_R8_ST19_FRACT_LUMBAR_SPINE_PELVIS	IVW	4	0.11961	0.0613685	0.0512909
finngen_R8_ULCERENTER	IVW	4	0.126402	0.0652121	0.0525838
finngen_R8_I9_E_DRONE	IVW	4	0.277047	0.143486	0.0535047
finngen_R8_H7_GLAUCOMA_NTG	IVW	4	0.137006	0.0713286	0.0547606
finngen_R8_ASTHMA_ACUTE_RESPIRATORY_INFECTIONS	IVW	4	0.0183994	0.00959095	0.0550588
finngen_R8_DM_KETOACIDOSIS	IVW	4	0.0513906	0.0268532	0.0556507
finngen_R8_L12_GRANULOMATOUSSKIN	IVW	4	-0.45492	0.237879	0.0558251
finngen_R8_M13_INFBURSA	IVW	4	0.261962	0.137359	0.0565021
finngen_R8_H8_OTIMEDNAS	IVW	3	-0.189912	0.0996437	0.0566617
finngen_R8_APPENDACUT_COMPLIC	IVW	4	-0.112972	0.0596183	0.0581038
finngen_R8_M13_SYSTCONNECT	IVW	4	-0.0579015	0.0305625	0.0581546
finngen_R8_ULCEROTH	IVW	4	-0.203031	0.10738	0.0586545
finngen_R8_ASTHMA_EOSINOPHIL_SUGG	IVW	4	0.159571	0.0846001	0.0592704
finngen_R8_H7_EYEADNEXOTH	IVW	4	0.140005	0.0742925	0.0594965
finngen_R8_INV_VENT	IVW	4	0.113763	0.0605888	0.0604321
finngen_R8_G6_MS	IVW	4	-0.108947	0.058282	0.0615793
finngen_R8_J10_TONSILLITIS	IVW	4	-0.0700231	0.0374863	0.0617671
finngen_R8_C3_BLADDER_EXALLC	IVW	4	-0.193123	0.103582	0.0622577
finngen_R8_I9_POSTAMI	IVW	4	0.125012	0.0672675	0.0631072
finngen_R8_M13_JUVOSTEOCHONRHIP	IVW	4	0.325324	0.175089	0.0631628
finngen_R8_PRIM_KNEEARTHROSIS	IVW	4	-0.0660124	0.0355633	0.0634254
finngen_R8_KRA_PSY_DEVWIDE_EXMORE	IVW	4	0.285637	0.154441	0.0643876
finngen_R8_M13_RECUDISLOCATIO	IVW	4	-0.21919	0.119197	0.0659308
finngen_R8_L12_ACTINKERA	IVW	4	-0.0917243	0.0499027	0.0660529
finngen_R8_ASTHMA_CHILD_EXMORE	IVW	4	0.055138	0.0300004	0.0660761
finngen_R8_K11_CHRONGASTR	IVW	4	0.0609435	0.0331773	0.0662239
finngen_R8_D3_COAGDEFNAS	IVW	3	0.333739	0.18175	0.0663204
finngen_R8_H7_DIPLOPIA	IVW	4	-0.200411	0.109363	0.0668722
finngen_R8_H7_KERATITISOTH	IVW	4	-0.0605628	0.0333824	0.0696451
finngen_R8_C3_OVARY_EXALLC	IVW	3	-0.31051	0.171506	0.0702204
finngen_R8_E4_OBESITYCAL	IVW	4	-0.0605454	0.0335267	0.0709359
finngen_R8_AB1_BACT_BIR_OTHER_INF_AGENTS	IVW	4	0.162178	0.0900594	0.0717363
finngen_R8_F5_DEMINOTH	IVW	4	-0.188902	0.104989	0.071977
finngen_R8_E4_HYPERLIPNAS	IVW	4	0.0822679	0.0457597	0.0722051
finngen_R8_G6_ATYFAC	IVW	4	0.138031	0.0769524	0.0728587
finngen_R8_L12_ERYTHEMATOUSOTH	IVW	4	0.309191	0.172512	0.0730877
finngen_R8_I9_VARICVESOTH	IVW	4	0.239292	0.133651	0.0733852
finngen_R8_D3_IMMUDEFANTIBODY	IVW	4	-0.295916	0.165365	0.0735377
finngen_R8_FALLS	IVW	4	0.154008	0.0861011	0.0736652
finngen_R8_G6_MYOPOTHUNS	IVW	4	-0.121637	0.068313	0.0749796
finngen_R8_GEST_DIABETES	IVW	4	-0.0732001	0.0411394	0.0751875
finngen_R8_G6_NEUATR	IVW	4	-0.26703	0.150505	0.0760257
finngen_R8_C3_NSCLC_ADENO_EXALLC	IVW	4	-0.0976085	0.0552664	0.0773715
finngen_R8_ASTHMA_INFECTIONS	IVW	4	0.0360014	0.0205248	0.0794231
finngen_R8_L12_PILONIDALCYST	IVW	4	0.148543	0.084771	0.079725
finngen_R8_D3_IMMUNEMECHANISMNAS	IVW	4	-0.134834	0.0769563	0.0797585
finngen_R8_ST19_FRACT_NECK	IVW	4	-0.182343	0.104244	0.0802561
finngen_R8_J10_PNEUMOPNEUMO	IVW	4	-0.290771	0.166514	0.0807717
finngen_R8_K11_PERITONITIS	IVW	4	-0.144385	0.0828685	0.0814498
finngen_R8_C3_MENINGES_EXALLC	IVW	4	-0.140896	0.0809337	0.0817049
finngen_R8_K11_OTHENTERCOL	IVW	4	0.0184785	0.0106176	0.0817931
finngen_R8_RX_CODEINE_TRAMADOL	IVW	4	-0.0186303	0.0108054	0.0846778
finngen_R8_KRA_PSY_HYPERKIN_EXMORE	IVW	4	0.128648	0.0749446	0.0860566
finngen_R8_D3_COAGDEF	IVW	4	-0.343206	0.201253	0.0881291
finngen_R8_CD2_BENIGN_KIDNEY	IVW	4	0.376167	0.221926	0.0900734
finngen_R8_G6_XTRAPYR	IVW	4	-0.0794882	0.0469527	0.0904665
finngen_R8_AB1_EBV	IVW	4	0.171146	0.101587	0.0920405
finngen_R8_M13_MEDIALEPICOND	IVW	4	0.221843	0.132672	0.0945011
finngen_R8_K11_VASCINT	IVW	4	-0.112147	0.0671423	0.0948625
finngen_R8_L12_NAIL_INGROW	IVW	4	-0.204293	0.122561	0.09554
finngen_R8_CD2_BENIGN_LEIOMYOMA_UTERI	IVW	4	0.0279838	0.0168529	0.0968186
finngen_R8_DM_MACULOPATHY_EXMORE	IVW	4	0.172347	0.103956	0.0973417
finngen_R8_NEURODEGOTH	IVW	4	-0.0336058	0.0204638	0.100547
finngen_R8_L12_PSORI_ARTHRO	IVW	4	-0.101636	0.0619246	0.100736
finngen_R8_M13_SHOULDERBURSITIS	IVW	4	0.163625	0.0998093	0.101136
finngen_R8_O15_LABOUR_MALPOS	IVW	4	0.0421197	0.0257578	0.102002
finngen_R8_M13_SCOLIOSIS	IVW	4	-0.175784	0.107535	0.102117
finngen_R8_M13_PLANTARFASC	IVW	4	-0.148224	0.0908795	0.102892
finngen_R8_O15_PLAC_PREMAT_SEPAR	IVW	4	-0.140013	0.0858572	0.102939
finngen_R8_CD2_BENIGN_COLORECANI	IVW	4	0.0360843	0.0221639	0.103511
finngen_R8_KRA_PSY_EATING_EXMORE	IVW	4	-0.156554	0.0963612	0.104236
finngen_R8_H8_EXT_OTH	IVW	4	0.191799	0.118381	0.105192
finngen_R8_O15_PLAC_PRAEVIA	IVW	4	-0.309644	0.191683	0.106226
finngen_R8_K11_HERNIA	IVW	4	-0.0411876	0.025565	0.10716
finngen_R8_N14_INFLUTH	IVW	4	-0.0918166	0.0572466	0.108741
finngen_R8_CD2_BENIGN_SALIVARY	IVW	4	-0.117952	0.0735615	0.108837
finngen_R8_L12_CORNSANDCALLOS	IVW	4	-0.20434	0.127521	0.109066
finngen_R8_G6_HYDROCEPH	IVW	4	0.148015	0.0925244	0.109657
finngen_R8_O15_POSTPART_HAEMORRH_PLACENTA	IVW	4	0.122587	0.0766424	0.109716
finngen_R8_J10_UPPERINFEC	IVW	4	-0.0194916	0.0122418	0.111338
finngen_R8_AB1_TUBERCULOSIS	IVW	4	-0.108338	0.0685955	0.114249
finngen_R8_M13_SACROCOGG	IVW	4	0.344823	0.218807	0.115044
finngen_R8_N14_AMENORRHEAPRIM	IVW	4	0.121657	0.0772918	0.11549
finngen_R8_CD2_BENIGN_ADRENAL	IVW	4	-0.114126	0.0728849	0.117386
finngen_R8_C3_PANCREAS_EXALLC	IVW	4	0.218152	0.139383	0.117552
finngen_R8_N14_URETHRALSTRICT	IVW	4	-0.176601	0.11286	0.117636
finngen_R8_K11_DISORD_TEETH	IVW	4	0.0699587	0.0450659	0.120575
finngen_R8_F5_ALZHDEMENT	IVW	4	0.147278	0.0948864	0.120627
finngen_R8_J10_TONSILLECTOMY	IVW	4	0.0462359	0.0298421	0.121297
finngen_R8_E4_HYTHY_AI_STRICT	IVW	4	-0.025246	0.0163052	0.12154
finngen_R8_Q17_ASD	IVW	4	-0.15642	0.101173	0.122088
finngen_R8_C3_RECTUM_ADENO	IVW	4	0.0767367	0.0496494	0.122208
finngen_R8_M13_SOFTTISSUEOTH	IVW	4	-0.0253613	0.0164169	0.122387
finngen_R8_L12_ABSCESS_CUT	IVW	4	-0.0554067	0.0358708	0.122438
finngen_R8_CHRONSMALL	IVW	4	-0.0581087	0.0376811	0.123044
finngen_R8_DM_RETINA_PROLIF	IVW	4	-0.0686859	0.0445737	0.123328
finngen_R8_L12_INFECT_SKIN	IVW	4	-0.0446917	0.0291492	0.125225
finngen_R8_L12_SCARCONDITIONS	IVW	4	0.13339	0.0870385	0.125391
finngen_R8_G6_ALCODEGEN	IVW	4	0.257363	0.168127	0.125828
finngen_R8_C_DIFFICILE_ENTEROCOLITIS	IVW	4	-0.166113	0.108773	0.126722
finngen_R8_KRA_PSY_PERSON_EXMORE	IVW	4	0.0806832	0.0528601	0.126922
finngen_R8_PRIM_COXARTHROSIS	IVW	4	-0.0820477	0.0539468	0.128285
finngen_R8_AB1_OTHER_SPIROCHAETAL	IVW	4	-0.109868	0.0722765	0.128484
finngen_R8_E4_GLUCOPANCREAS	IVW	4	0.103183	0.0678836	0.128511
finngen_R8_U22_COVID19_CONFIRMED	IVW	4	-0.164951	0.10905	0.130375
finngen_R8_F5_DEPPER	IVW	4	0.369777	0.244575	0.130555
finngen_R8_M13_ANKYLOSPON_STRICT	IVW	4	0.102491	0.0678245	0.130758
finngen_R8_L12_URTICA_ALLERG	IVW	4	0.0876128	0.0584164	0.133667
finngen_R8_E4_DMNASNOCOMP	IVW	4	0.0906388	0.0604354	0.133675
finngen_R8_AB1_ANOGENITAL_HERPES_SIMPLEX	IVW	3	-0.207436	0.138406	0.133938
finngen_R8_L12_URTICARIA	IVW	4	0.0267674	0.0178909	0.134615
finngen_R8_DM_NEPHROPATHY_EXMORE	IVW	4	-0.052337	0.0350508	0.135391
finngen_R8_CD2_NONHODGKIN_NAS_EXALLC	IVW	4	-0.132901	0.0890961	0.13579
finngen_R8_Q17_LVOTO_BROAD	IVW	4	-0.213577	0.144239	0.138682
finngen_R8_CD2_BENIGN_MELANOCYTIC_NOS	IVW	4	-0.137941	0.0932883	0.139235
finngen_R8_F5_BIPO	IVW	4	-0.0886792	0.0600336	0.139633
finngen_R8_K11_STOMATITIS	IVW	4	-0.0964779	0.065371	0.139984
finngen_R8_I9_LYMPHOTH	IVW	4	-0.207763	0.141251	0.141326
finngen_R8_ALCOHOLACUTE10	IVW	4	0.0472699	0.0321978	0.142074
finngen_R8_N14_OTHNONINFUTER	IVW	4	0.0727735	0.04976	0.143607
finngen_R8_DRUGADVERS_CATAR	IVW	4	0.127911	0.0875541	0.144032
finngen_R8_O15_COMPLIC_LAB_DELIV	IVW	4	0.00897211	0.00615738	0.14508
finngen_R8_AUTOIMMUNE	IVW	4	-0.0165399	0.0114003	0.146827
finngen_R8_I9_CAVS_OPERATED	IVW	4	-0.0959587	0.066363	0.148186
finngen_R8_O15_PREG_MATERN_CARE	IVW	4	0.0815912	0.0566997	0.150149
finngen_R8_O15_LABOUR_UMBILICAL	IVW	4	-0.215889	0.150843	0.152367
finngen_R8_AB1_GASTROENTERITIS_NOS	IVW	4	-0.0324231	0.0226609	0.15249
finngen_R8_CD2_BENIGN_CHOROID	IVW	4	-0.127518	0.089516	0.154293
finngen_R8_AUTOIMMUNE_NONTHYROID	IVW	4	-0.00967148	0.00679558	0.154678
finngen_R8_K11_CONSTIPATION	IVW	4	-0.0222676	0.0156617	0.155089
finngen_R8_N14_VAGINAL_DYSPLASIA_ALL	IVW	4	0.228216	0.161111	0.156626
finngen_R8_DM_RETINA_NOS	IVW	4	0.077527	0.0547649	0.156883
finngen_R8_ULCERRECT	IVW	4	0.148815	0.105566	0.158633
finngen_R8_I9_CARDMYOOTH	IVW	4	-0.103412	0.0733965	0.158849
finngen_R8_C3_OTHER_SKIN_EXALLC	IVW	4	-0.0328597	0.0234082	0.160387
finngen_R8_D3_AGRANULOCYTOSIS	IVW	4	-0.108036	0.0770338	0.160781
finngen_R8_TBC_RESP	IVW	4	-0.144883	0.103367	0.161025
finngen_R8_N14_RENFAIL	IVW	4	-0.0715759	0.0511163	0.161436
finngen_R8_E4_THYROIDITSUBAC	IVW	4	-0.251836	0.180531	0.163022
finngen_R8_FG_CVD	IVW	4	0.0358219	0.0256953	0.163286
finngen_R8_M13_METATARSALGIA	IVW	4	0.0589507	0.0423152	0.16358
finngen_R8_F5_ANOREX	IVW	4	0.166494	0.119857	0.1648
finngen_R8_H8_VERTIGO	IVW	4	0.0218992	0.0158351	0.166679
finngen_R8_M13_LIMBPAIN	IVW	4	-0.0357307	0.0258585	0.16704
finngen_R8_L12_CELLULITIS	IVW	4	-0.0863557	0.0625231	0.167223
finngen_R8_O15_DELIV_MULTIP	IVW	4	0.136865	0.0992039	0.167699
finngen_R8_K11_REIMB_202	IVW	4	-0.0230865	0.0167604	0.168374
finngen_R8_K11_ORAL_LICHEN_PLANUS_INCLAVO	IVW	4	0.363387	0.264006	0.168687
finngen_R8_O15_ICP_WIDE_EXMORE	IVW	3	0.201144	0.146455	0.169621
finngen_R8_M13_POLYARTHRITIS	IVW	4	-0.222852	0.162697	0.170769
finngen_R8_AB1_SEQULAE_INF_NOS	IVW	4	0.225438	0.165349	0.172754
finngen_R8_M13_MENISCUSDERANGEMENTS	IVW	4	-0.0318844	0.0234181	0.173347
finngen_R8_C3_LIVER_INTRAHEPATIC_BILE_DUCTS_EXALLC	IVW	4	-0.282048	0.207595	0.17426
finngen_R8_DM_NEUROPATHY	IVW	4	0.0982198	0.0723208	0.174428
finngen_R8_M13_SOFTTISSUENAS	IVW	4	-0.165864	0.122307	0.175057
finngen_R8_M13_IMPINGEMENT	IVW	3	-0.133914	0.0987473	0.175059
finngen_R8_E4_DM2NASCOMP	IVW	4	-0.0218197	0.0161324	0.176205
finngen_R8_M13_HALLUXVALGUS	IVW	4	0.0168245	0.0124495	0.176564
finngen_R8_M13_DORSALGIANAS	IVW	4	-0.0876875	0.0649541	0.177018
finngen_R8_L12_OTHERDISSKINANDSUBCUTIS	IVW	4	0.0947105	0.0702716	0.17773
finngen_R8_O15_MATERN_CARE_DISPROP	IVW	4	0.215052	0.160077	0.179134
finngen_R8_C3_THYROID_GLAND_EXALLC	IVW	4	-0.0694009	0.0517915	0.180244
finngen_R8_O15_DELIV_PERIN_LACER	IVW	4	-0.0250471	0.018717	0.180831
finngen_R8_DM_PERIPH_ANGIOPATHY	IVW	4	0.165531	0.123743	0.180993
finngen_R8_AB1_BACT_INTEST_OTH	IVW	3	-0.13816	0.103351	0.181288
finngen_R8_M13_MYOSITIS	IVW	4	-0.187833	0.140596	0.181558
finngen_R8_C3_MELANOMA_EXALLC	IVW	4	0.0592189	0.0443403	0.181695
finngen_R8_K11_OTHILEUS	IVW	4	0.0828604	0.062246	0.183131
finngen_R8_C3_RECTUM_EXALLC	IVW	4	0.083501	0.0627642	0.183389
finngen_R8_C3_CERVIX_UTERI_EXALLC	IVW	4	0.0952464	0.0717121	0.184119
finngen_R8_H7_GLOBE	IVW	4	0.129866	0.0982995	0.186461
finngen_R8_O15_LABOUR_OBSTR_OTHER	IVW	4	0.0932209	0.0706595	0.18707
finngen_R8_N14_HYPERTROPHYBREAST_BOTH	IVW	4	0.0626377	0.0475918	0.188125
finngen_R8_DM_POLYNEURO	IVW	4	-0.184037	0.140099	0.188975
finngen_R8_GE	IVW	4	0.188766	0.143894	0.189573
finngen_R8_C3_BASAL_CELL_CARCINOMA_EXALLC	IVW	4	-0.0189942	0.0145265	0.191025
finngen_R8_I9_MYOCARD	IVW	4	-0.257635	0.197614	0.192325
finngen_R8_H8_MIDDLEMASTOID	IVW	4	-0.0396481	0.0304576	0.193003
finngen_R8_H7_PARASTRA6	IVW	4	-0.295632	0.227182	0.193157
finngen_R8_N14_PROSTHYPERPLA	IVW	4	-0.0450346	0.0347229	0.194642
finngen_R8_E4_DM2NEU	IVW	4	-0.0808901	0.0624822	0.195455
finngen_R8_Q17_OTHER_CONGEN_MALFO_CIRCULATO_SYSTEM	IVW	4	-0.289604	0.223777	0.195609
finngen_R8_KRA_PSY_CHILDEMOT_EXMORE	IVW	4	0.125788	0.0972044	0.195645
finngen_R8_N14_CALCULOWER	IVW	4	-0.210536	0.164234	0.19987
finngen_R8_K11_OTHANRECT	IVW	4	0.104912	0.0821139	0.201378
finngen_R8_I9_HYPTENS	IVW	4	-0.00919018	0.0072051	0.202129
finngen_R8_K11_ORAL_LEUCOPLAC_RELAT	IVW	4	-0.10197	0.0800241	0.202578
finngen_R8_FG_OTHHEART	IVW	4	0.0283235	0.0222355	0.202735
finngen_R8_M13_ARTHROSIS_KNEE	IVW	4	-0.0311594	0.0245356	0.204096
finngen_R8_D3_BLOODNAS	IVW	4	-0.184067	0.145161	0.204791
finngen_R8_H8_HL_NAS	IVW	4	-0.0710225	0.0560117	0.2048
finngen_R8_F5_DELUSIO	IVW	4	-0.155485	0.122736	0.205218
finngen_R8_I9_LBBB	IVW	4	0.130783	0.103809	0.207727
finngen_R8_D3_COAGDEF_PURPUR_HAEMORRHAGIC	IVW	4	0.0394036	0.0313219	0.208385
finngen_R8_J10_PNEUMONISOLLIQ	IVW	4	-0.0691416	0.0550567	0.20918
finngen_R8_G6_CERCYST	IVW	4	0.135046	0.107634	0.209593
finngen_R8_K11_OESOBST	IVW	4	0.237775	0.189977	0.210715
finngen_R8_C3_BASAL_CELL_CARCINOMA_INCLAVO_EXALLC	IVW	4	-0.0158643	0.0126802	0.210892
finngen_R8_M13_BONECONTINUITY	IVW	4	0.0762661	0.0611	0.211951
finngen_R8_M13_HALLUXRIGIDUS	IVW	3	-0.130318	0.104492	0.212337
finngen_R8_K11_PERIODON_CHRON	IVW	4	0.0625514	0.0502131	0.212868
finngen_R8_G6_HCNP	IVW	4	0.0997898	0.0801961	0.213381
finngen_R8_L12_NAILDIS	IVW	4	-0.133662	0.107741	0.21476
finngen_R8_O15_MATERN_CARE_FETAL_ABNORM	IVW	4	-0.052303	0.0422171	0.215381
finngen_R8_M13_OSTEOPOROSIS	IVW	4	-0.103921	0.084014	0.216107
finngen_R8_L12_DERMATITISECZEMA	IVW	4	-0.0276945	0.0224204	0.216742
finngen_R8_I9_AORTDIS	IVW	4	-0.199403	0.161466	0.216846
finngen_R8_I9_NONISCHCARDMYOP	IVW	4	0.0384602	0.0311502	0.216953
finngen_R8_N14_VULVAL_DYSPLASIA_ALL	IVW	4	0.180134	0.146028	0.217369
finngen_R8_H7_HERPESKERATITIS	IVW	4	-0.17673	0.14338	0.217724
finngen_R8_M13_ALGONEURO	IVW	4	-0.11838	0.0961845	0.218413
finngen_R8_O15_PUERP_SEPSIS	IVW	4	-0.128368	0.104304	0.218431
finngen_R8_D3_HAEMOLYTICANAEMIA	IVW	4	0.17154	0.139413	0.218532
finngen_R8_T1D_WIDE	IVW	4	0.0501743	0.04093	0.220253
finngen_R8_H7_IRIDOACUTE	IVW	4	-0.0904703	0.0738162	0.220343
finngen_R8_H7_RETINANAS	IVW	4	-0.124596	0.101732	0.220673
finngen_R8_KRA_PSY_CODUCTEMOT_EXMORE	IVW	4	0.350653	0.286584	0.221117
finngen_R8_K11_CHOLECYST	IVW	4	0.120621	0.0986484	0.221431
finngen_R8_N14_CHRONEPHROPATH	IVW	4	-0.176808	0.144752	0.221913
finngen_R8_M13_DEFORMACQ	IVW	4	0.127929	0.104888	0.222588
finngen_R8_AB1_MUMPS	IVW	3	-0.259455	0.212773	0.222693
finngen_R8_L12_PSORI_NAS	IVW	4	0.110232	0.0903992	0.222695
finngen_R8_NIV	IVW	4	-0.0749729	0.0615354	0.223083
finngen_R8_Z21_PROCREATIVE_MANAG	IVW	4	0.0824813	0.0677631	0.223528
finngen_R8_N14_BARTHOABSCESS	IVW	4	-0.219694	0.181575	0.226305
finngen_R8_FG_DOAAC	IVW	4	0.0602082	0.0500365	0.228866
finngen_R8_H8_EXT_INFNAS	IVW	4	-0.145459	0.121074	0.229594
finngen_R8_N14_OVARTORS	IVW	4	0.198776	0.165666	0.230194
finngen_R8_I9_PERICAOTH	IVW	4	0.228874	0.190896	0.230549
finngen_R8_N14_HYPERTROPHYBREAST	IVW	4	0.0626628	0.0524742	0.232414
finngen_R8_H7_VISUDISTURBSUB	IVW	4	-0.0978815	0.0821269	0.233327
finngen_R8_G6_STATUSEPI	IVW	4	-0.127741	0.107676	0.235485
finngen_R8_AB1_SEQULEAE_OF_INFECTIONS_AND_PARASITES	IVW	4	0.112661	0.0951344	0.236322
finngen_R8_OFFICIAL_TILASTOKESKUS_DEATH	IVW	4	-0.0691666	0.0584083	0.236338
finngen_R8_M13_TRIGGERFINGER	IVW	4	-0.0734355	0.0621226	0.237164
finngen_R8_I9_VARICVEOES	IVW	4	-0.158804	0.134573	0.237977
finngen_R8_RX_GLUCOSAMINE	IVW	4	-0.0546221	0.0463973	0.239089
finngen_R8_K11_PERIODON_CHRON_COMPL	IVW	4	0.112043	0.0952476	0.239462
finngen_R8_PNEUMO_SEPTHICHE	IVW	4	0.0831608	0.0711822	0.242694
finngen_R8_F5_CANNABIS	IVW	4	0.304104	0.260378	0.242834
finngen_R8_SCND_OTH_KNEEARTHROSIS	IVW	4	-0.0671827	0.0575258	0.242859
finngen_R8_I9_SAHANEUR	IVW	4	0.119558	0.102466	0.243289
finngen_R8_H7_EPISCLERITIS	IVW	4	0.139089	0.11933	0.243784
finngen_R8_RX_STATIN	IVW	4	0.0153544	0.0131783	0.243969
finngen_R8_M13_ARTHTROSIS_COX_PRIM_HIPSURG	IVW	4	-0.0581432	0.0499507	0.244419
finngen_R8_M13_FLATFOOT	IVW	4	-0.164246	0.141184	0.24469
finngen_R8_H7_RETINALDETACHBREAK	IVW	4	-0.097618	0.0839942	0.245155
finngen_R8_F5_DEPRESSIO	IVW	4	0.0201532	0.0173761	0.24612
finngen_R8_H8_EXTDISINOTH	IVW	4	-0.129858	0.112582	0.248725
finngen_R8_H7_CHOROIDRETINA	IVW	4	-0.0320447	0.0277899	0.248866
finngen_R8_G6_OTHNEU	IVW	4	-0.0246659	0.0214084	0.249255
finngen_R8_N14_INFLAMMBREAST	IVW	4	-0.177805	0.154368	0.249393
finngen_R8_I9_AORTVALV_EARLY	IVW	4	-0.182271	0.158425	0.249931
finngen_R8_J10_CHRONSINUSITIS	IVW	4	-0.0345908	0.0301815	0.251757
finngen_R8_I9_CABG	IVW	4	-0.0576955	0.0504025	0.252335
finngen_R8_M13_ARTHROSIS	IVW	4	-0.0201269	0.0175964	0.252704
finngen_R8_Q17_CONGEN_MALFO_OVARIES_FALLOP_TUBES_BROAD_LIGAM	IVW	4	0.0976088	0.0853598	0.252831
finngen_R8_CD2_BENIGN_LIPOMATOUS	IVW	4	0.0408163	0.0357049	0.252973
finngen_R8_J10_LOWERINF	IVW	4	-0.0207426	0.0182155	0.254814
finngen_R8_H7_VISUDISTURB	IVW	4	-0.0624209	0.0548315	0.254948
finngen_R8_ANOSMIA	IVW	4	0.192593	0.169453	0.255724
finngen_R8_K11_MN_RETRGN_AND_SURG	IVW	4	-0.163193	0.143806	0.256453
finngen_R8_H8_NONSUPPNAS	IVW	4	-0.0434142	0.0383558	0.257684
finngen_R8_PULM_INFECTIONS	IVW	4	-0.0137862	0.0121887	0.258031
finngen_R8_H7_PTOSIS	IVW	4	-0.091234	0.0807007	0.258256
finngen_R8_CD2_BENIGN_RECTOSIGMOID_JUNC	IVW	4	0.0884873	0.0783078	0.258479
finngen_R8_I9_PERICARD	IVW	4	0.21248	0.188303	0.259154
finngen_R8_M13_PSORIARTH	IVW	4	-0.10193	0.0909408	0.262356
finngen_R8_CD2_BENIGN_CONNSOFT_UPPERLIMB	IVW	4	0.098186	0.0876555	0.262656
finngen_R8_L12_ALLERGICCONTACT	IVW	4	0.094388	0.084337	0.263065
finngen_R8_Z21_PROBL_RELATED_MEDICAL_FACILITI_OTH_HEALTH_CARE	IVW	4	0.0925739	0.0832049	0.26588
finngen_R8_CD2_BENIGN_MENINGES	IVW	4	-0.0988198	0.0888773	0.266195
finngen_R8_N14_VULVAL_LSIL	IVW	4	0.243485	0.21925	0.266767
finngen_R8_H7_SCLERACORNEA	IVW	4	-0.0337684	0.0304349	0.267202
finngen_R8_L12_PRURIGONOD	IVW	4	-0.256598	0.231274	0.267215
finngen_R8_BLEEDING	IVW	4	-0.0216434	0.0195172	0.267455
finngen_R8_NONALLERG_ASTHMA_EXMORE	IVW	4	-0.0506111	0.0456683	0.267762
finngen_R8_H7_CONJUNCTIVITISCHRON	IVW	4	-0.241481	0.218417	0.268903
finngen_R8_H7_IRIDONAS	IVW	4	-0.14021	0.127145	0.270133
finngen_R8_KRA_PSY_ALCOH_EXMORE	IVW	4	-0.0422654	0.0383523	0.270449
finngen_R8_ASTHMA_PNEUMONIA	IVW	4	0.0549143	0.0499943	0.272025
finngen_R8_G6_MONOLOWOTHUNS	IVW	4	-0.0712787	0.0649146	0.272189
finngen_R8_ST19_TOXIC_EFFECT_ETHAN	IVW	4	-0.116519	0.106327	0.273143
finngen_R8_H7_RETINAVASC	IVW	4	-0.0848628	0.0774677	0.273315
finngen_R8_L12_BULLOTH	IVW	4	-0.295735	0.27095	0.275065
finngen_R8_K11_OTHDISDIG	IVW	4	0.0551864	0.0506278	0.275694
finngen_R8_L12_LICHSIMPANDPRURIGO	IVW	4	-0.0251735	0.0231908	0.277702
finngen_R8_ULCERILEO	IVW	4	-0.0835059	0.077157	0.279125
finngen_R8_K11_PERITON	IVW	4	-0.0682211	0.0631801	0.280237
finngen_R8_T2D_WIDE	IVW	4	-0.0330572	0.0306698	0.281104
finngen_R8_G6_SLEEPAPNO	IVW	4	-0.0388216	0.0361577	0.282969
finngen_R8_E4_OBESITYNAS	IVW	4	-0.0326547	0.030433	0.283271
finngen_R8_M13_OVERUSENAS	IVW	4	-0.225674	0.210444	0.283553
finngen_R8_I9_ARTOTH	IVW	4	0.158673	0.148117	0.284051
finngen_R8_J10_VOCALLARYNX	IVW	4	-0.0333576	0.0311698	0.284535
finngen_R8_N14_URINOTH	IVW	3	-0.0313104	0.0293112	0.285427
finngen_R8_M13_ARTHINOTH	IVW	4	-0.0872711	0.0817983	0.286014
finngen_R8_KRA_PSY_BEHAV_EXMORE	IVW	4	-0.13076	0.122698	0.286556
finngen_R8_CD2_BENIGN_PAROTID	IVW	4	-0.097843	0.0919257	0.287161
finngen_R8_F5_SUBSNOALCO	IVW	4	0.0799353	0.0751392	0.287406
finngen_R8_AB1_VIRAL_HEMOR_FEVER_NOS	IVW	4	0.0606775	0.0570416	0.287447
finngen_R8_N14_ENDOMETRIOSIS_RECTPVAGSEPT_VAGINA	IVW	4	0.0513547	0.0488217	0.292854
finngen_R8_AB1_SALMONELLA_OTH	IVW	2	0.19232	0.183	0.293291
finngen_R8_M13_ENTEROARTHR	IVW	4	0.0727784	0.0694345	0.294565
finngen_R8_H7_CATARACTSENILE	IVW	4	0.0141798	0.0135435	0.295106
finngen_R8_H7_RETINOPATHYDIAB_BKG	IVW	4	0.0716837	0.0685675	0.295816
finngen_R8_CAMPYLOENTERITIS	IVW	3	-0.235973	0.225721	0.295828
finngen_R8_H7_EYELIDDIS	IVW	4	-0.0295431	0.0283129	0.29674
finngen_R8_D3_ANAEMIANAS	IVW	4	-0.0428854	0.0412205	0.298159
finngen_R8_H7_RETINASEPAR	IVW	4	-0.156089	0.150237	0.29883
finngen_R8_ST19_FRACT_RIBS_STERNUM_THORACIC_SPINE	IVW	2	-0.0669579	0.0646298	0.300192
finngen_R8_AD_AM_EXMORE	IVW	4	-0.187304	0.180798	0.30021
finngen_R8_E4_DM1NASCOMP	IVW	4	0.0195946	0.0189614	0.30142
finngen_R8_E4_THYROID	IVW	4	-0.0265262	0.0257247	0.302467
finngen_R8_AB1_RESP_TUBERCU_NONCONF	IVW	4	-0.167173	0.162545	0.303727
finngen_R8_H7_GLAUCOMAMEDICATION	IVW	4	-0.0967686	0.0943868	0.305253
finngen_R8_CD2_BENIGN_MELANOCYTIC_SCALPNECK	IVW	4	0.169774	0.165811	0.305883
finngen_R8_ASTHMA_MIXED_EXMORE	IVW	4	0.114926	0.112346	0.306326
finngen_R8_AB1_VIRAAL_CONJUNCT	IVW	4	0.34156	0.334254	0.306849
finngen_R8_M13_ARTHTROSIS_COX_PRIM_ICD10	IVW	4	-0.0305038	0.0298532	0.306879
finngen_R8_CPAP	IVW	4	0.0214207	0.0209907	0.307499
finngen_R8_F5_PARAPER	IVW	4	0.208413	0.204372	0.307836
finngen_R8_M13_OSTEOCHONDRO	IVW	4	-0.0467343	0.0458962	0.308554
finngen_R8_C3_BRAIN_EXALLC	IVW	3	0.361459	0.355072	0.308684
finngen_R8_K11_PARODON_OPER_DENTAL_OPER	IVW	4	0.0282741	0.0278289	0.309631
finngen_R8_F5_DEMNAS	IVW	4	-0.0426537	0.0420696	0.310638
finngen_R8_CD2_BENIGN_DUODENUM	IVW	4	0.385985	0.38085	0.310829
finngen_R8_H7_PRESBYOPIA	IVW	4	-0.098555	0.0973248	0.311232
finngen_R8_N14_POLYPFEMGEN	IVW	4	0.0689982	0.0681827	0.311557
finngen_R8_H8_OTHEREAR	IVW	4	-0.0229703	0.022752	0.312688
finngen_R8_CD2_BENIGN_OTHERDIGESTIVE	IVW	4	0.0250592	0.0248489	0.313233
finngen_R8_CD2_BENIGN_MENINGES_CEREBRAL	IVW	4	-0.0740033	0.0734145	0.313445
finngen_R8_FG_CARDMYO	IVW	4	0.0611959	0.0608234	0.314356
finngen_R8_G6_HEMIPLE	IVW	4	0.120283	0.119824	0.31546
finngen_R8_CD2_BENIGN_CRANIAL_NERVE	IVW	4	0.181903	0.181414	0.316006
finngen_R8_F5_ANXIETY	IVW	4	0.0341422	0.0340954	0.316646
finngen_R8_I9_NONISCHCARDMYOP_STRICT	IVW	4	0.0816619	0.0818563	0.318462
finngen_R8_ALCO_PRESCRIPTION	IVW	4	-0.0563888	0.0566021	0.319138
finngen_R8_K11_ALCOLIV	IVW	4	-0.0995395	0.100162	0.320329
finngen_R8_I9_NONRHEVALV	IVW	4	-0.0502183	0.0506368	0.321326
finngen_R8_CD2_BENIGN_SALIVARY_NOS	IVW	4	-0.0610257	0.0615813	0.321696
finngen_R8_I9_SAH	IVW	4	0.119854	0.120955	0.321735
finngen_R8_N14_CALCUKIDUR	IVW	4	-0.0847551	0.0856188	0.322217
finngen_R8_G6_XTRAPYROTH	IVW	3	0.103421	0.104626	0.322918
finngen_R8_H7_IRIDOCYCLITIS	IVW	4	-0.0637185	0.0646151	0.324072
finngen_R8_H8_EUSTNAS	IVW	4	0.194546	0.197308	0.324133
finngen_R8_F5_OPIOIDS	IVW	4	0.145119	0.147261	0.3244
finngen_R8_H7_IRIDOCYC_ANTER	IVW	4	-0.0757092	0.0768621	0.324624
finngen_R8_J10_PNEUMOTHORAX	IVW	4	-0.0999947	0.101557	0.324814
finngen_R8_C3_PROSTATE_EXALLC	IVW	4	-0.026661	0.0270959	0.32514
finngen_R8_H7_PTERYGIUM	IVW	4	0.223066	0.227339	0.326492
finngen_R8_E4_DMNASNASCOMP	IVW	4	-0.178837	0.182364	0.326761
finngen_R8_N14_NEPHROTICSYND	IVW	4	-0.301956	0.308167	0.327162
finngen_R8_CHILDHOOD_ALLERGY	IVW	4	0.0781705	0.0801437	0.329372
finngen_R8_E4_VIT_B_DEF	IVW	4	0.217113	0.222669	0.329536
finngen_R8_H7_MODVISIMPBINOC	IVW	4	-0.161608	0.166039	0.330397
finngen_R8_I9_PAROXTAC	IVW	4	0.06472	0.0665174	0.330564
finngen_R8_O15_LABOUR_LONG	IVW	4	-0.0648992	0.066763	0.331009
finngen_R8_C3_BREAST_EXALLC	IVW	4	0.0370519	0.0381641	0.331619
finngen_R8_DENTAL_TMD	IVW	4	-0.0530728	0.0547356	0.332235
finngen_R8_E4_HYPOPIT	IVW	4	-0.0681153	0.0702768	0.332424
finngen_R8_K11_ILEUS	IVW	4	0.0422581	0.0436816	0.333338
finngen_R8_M13_MUSCLEDISNAS	IVW	3	-0.325781	0.338478	0.335805
finngen_R8_E4_GOITREDIFF	IVW	4	0.105495	0.109637	0.335938
finngen_R8_J10_BRONCHIOLITIS	IVW	4	0.145404	0.151652	0.33766
finngen_R8_N14_POSTMENBLEED	IVW	4	-0.0488907	0.0511445	0.339106
finngen_R8_N14_URETHRITISANDURSYNDR	IVW	3	-0.227947	0.239082	0.340375
finngen_R8_K11_ORAL_LICHEN_WIDE_HYPOT_THYRO	IVW	4	-0.106052	0.111324	0.340772
finngen_R8_M13_GLUTEALTEND	IVW	4	0.11335	0.119074	0.341136
finngen_R8_H7_RETINALDETACHOTH	IVW	4	-0.14597	0.15336	0.341192
finngen_R8_H8_HL_IDIOP	IVW	4	-0.0567188	0.0596431	0.34162
finngen_R8_THROMBOCYTAEMIA	IVW	3	0.182991	0.192817	0.342601
finngen_R8_O15_GESTAT_HYPERT	IVW	4	-0.0406938	0.0428801	0.342613
finngen_R8_K11_ORAL_LEUCOPLACIA_INCLAVO	IVW	4	-0.164306	0.175265	0.348516
finngen_R8_SLEEP	IVW	4	-0.0329574	0.0352039	0.349178
finngen_R8_E4_HYPOOSMNAT	IVW	4	0.0391217	0.0419556	0.351102
finngen_R8_AB1_BACTINF_NOS	IVW	4	0.0108566	0.0116442	0.351149
finngen_R8_KELA_DIAB_INSUL_EXMORE	IVW	4	-0.0123222	0.0132212	0.351335
finngen_R8_CD2_LYMPHOID_LEUKAEMIA_EXALLC	IVW	4	0.11231	0.12113	0.353828
finngen_R8_M13_SPINSTENOSIS	IVW	4	-0.0442248	0.0478039	0.354898
finngen_R8_L12_LICHENPLANUS_INCLAVO	IVW	4	-0.0700017	0.0756847	0.355012
finngen_R8_F5_ANAPER	IVW	4	-0.0725139	0.0784788	0.355489
finngen_R8_CHRONNAS	IVW	4	0.0913094	0.0988833	0.355796
finngen_R8_M13_PREPATELLARBURSITIS	IVW	4	-0.187342	0.203029	0.356146
finngen_R8_CD2_BENIGN_MOUTH_NOS	IVW	4	0.143439	0.155576	0.356535
finngen_R8_K11_PARODON_PERIAPIC_CHRONIC	IVW	4	0.0502833	0.0545382	0.356538
finngen_R8_E4_HYTHYNAS	IVW	4	-0.0287835	0.0314166	0.35957
finngen_R8_G6_ENCEPHOTH	IVW	4	-0.19492	0.213279	0.360757
finngen_R8_J10_NECROTIC	IVW	4	-0.19647	0.215483	0.361893
finngen_R8_F5_PSYCHDEV	IVW	4	0.0693647	0.0763923	0.363875
finngen_R8_CD2_PRIMARY_LYMPHOID_HEMATOPOIETIC_EXALLC	IVW	4	-0.0404651	0.0446802	0.365116
finngen_R8_M13_GOUT	IVW	4	0.0545281	0.0602351	0.365331
finngen_R8_O15_PREG_PROLONGED	IVW	4	0.108443	0.119829	0.365474
finngen_R8_L12_IMPETIGO	IVW	4	-0.103881	0.115016	0.366423
finngen_R8_O15_ABORT_SPONTAN	IVW	4	0.0458186	0.0508787	0.36783
finngen_R8_L12_DERMATITISNAS	IVW	4	-0.0547087	0.0607723	0.368001
finngen_R8_I9_ENDOCARD	IVW	4	0.165524	0.184283	0.369075
finngen_R8_H7_PARASTRAB	IVW	4	-0.0924928	0.103008	0.369231
finngen_R8_L12_LICHENPLANUS	IVW	4	-0.0872253	0.097346	0.370235
finngen_R8_I9_SECONDRIGHT	IVW	4	-0.177232	0.197811	0.370273
finngen_R8_SFN	IVW	4	-0.139728	0.155978	0.370349
finngen_R8_O15_MATERN_CARE_PELVIC_ABNORM	IVW	4	-0.045936	0.0513236	0.370773
finngen_R8_N14_FEMGENPAIN	IVW	4	0.0313941	0.0351304	0.371512
finngen_R8_AB1_VIRAL_HEPATITIS	IVW	4	0.118375	0.132535	0.371768
finngen_R8_O15_POSTPART_HAEMORRH_ANATOMY	IVW	4	-0.105631	0.118268	0.371779
finngen_R8_M13_ARTHROSIS_INCLAVO	IVW	4	-0.0174161	0.0195188	0.372246
finngen_R8_G6_SLEEPAPNO_INCLAVO	IVW	4	-0.0373113	0.0420243	0.374621
finngen_R8_CD2_BENIGN_OVARY	IVW	3	0.0681082	0.0768318	0.37537
finngen_R8_N14_PROSTATITIS	IVW	4	-0.0626133	0.0706507	0.37549
finngen_R8_L12_EPIDERMTHICKNAS	IVW	4	0.105518	0.119109	0.375675
finngen_R8_K11_OESITIS	IVW	3	0.136041	0.153863	0.376604
finngen_R8_M13_RHEUMA	IVW	4	-0.0362848	0.0410675	0.376944
finngen_R8_F5_AGORAPHOBIA	IVW	4	-0.122416	0.138678	0.37738
finngen_R8_J10_COPD	IVW	4	-0.011565	0.0131027	0.377432
finngen_R8_E4_FLUIDELECTRO	IVW	4	-0.0118267	0.0134201	0.378173
finngen_R8_C3_BREAST_HER2NEG_EXALLC	IVW	4	0.0439086	0.0502087	0.381834
finngen_R8_O15_PREG_ABORT	IVW	4	-0.015591	0.0178377	0.382095
finngen_R8_K11_KELAIBD	IVW	4	-0.0280719	0.0322137	0.383521
finngen_R8_N14_OTHNONINFCERVIX	IVW	4	0.161233	0.185787	0.385483
finngen_R8_F5_SPEECH	IVW	4	0.132324	0.152811	0.386525
finngen_R8_M13_LATERALEPICOND	IVW	4	-0.039337	0.0454458	0.38672
finngen_R8_C3_KIDNEY_NOTRENALPELVIS_EXALLC	IVW	3	0.128484	0.148464	0.386806
finngen_R8_F5_EATOTH	IVW	4	-0.100992	0.116816	0.387292
finngen_R8_M13_BICIPITALTEND	IVW	4	0.124199	0.143699	0.387424
finngen_R8_J10_LARYNGITIS	IVW	4	-0.0649125	0.0751413	0.387658
finngen_R8_AUTOIMMUNE_NONTHYROID_STRICT	IVW	4	-0.00804316	0.00932113	0.388195
finngen_R8_K11_BARRET	IVW	4	-0.102718	0.119144	0.388612
finngen_R8_DEATH	IVW	4	-0.0159959	0.0185729	0.389101
finngen_R8_J10_PHARYNGITIS	IVW	4	-0.0368276	0.0428396	0.389975
finngen_R8_M13_LOWBACKPAIN	IVW	4	0.027239	0.0317511	0.390952
finngen_R8_M13_ANKYLOSPON	IVW	4	0.0756696	0.0882254	0.391066
finngen_R8_E4_LIPOPROTNAS	IVW	4	0.0290163	0.033834	0.39111
finngen_R8_N14_VAGINITIS	IVW	4	-0.0670884	0.0782643	0.391333
finngen_R8_O15_PRE_OR_ECLAMPSIA	IVW	4	-0.0497155	0.0580337	0.391629
finngen_R8_I9_HEARTFAIL_AND_OVERWEIGHT	IVW	4	-0.0244948	0.0286645	0.392808
finngen_R8_Q17_OTHER_CONGEN_MALFO_SKIN	IVW	4	-0.0914331	0.107171	0.393575
finngen_R8_F5_DISSOCIATIVE	IVW	4	0.122165	0.143415	0.39431
finngen_R8_CD2_BENIGN_UTERUS_NOS	IVW	3	0.193011	0.226767	0.394691
finngen_R8_E4_FH_IHD	IVW	4	-0.144832	0.170466	0.395535
finngen_R8_O15_FAILED_INDUCT	IVW	4	-0.216604	0.255084	0.3958
finngen_R8_F5_SCHZPHR	IVW	4	0.0453068	0.0535316	0.397354
finngen_R8_I9_ABAORTANEUR	IVW	3	0.123472	0.145895	0.39738
finngen_R8_J10_EMPHYSEMA	IVW	4	-0.0704811	0.0833158	0.39758
finngen_R8_H7_CORNEALOTH	IVW	4	-0.0516251	0.0611292	0.398376
finngen_R8_T2D	IVW	4	-0.0229682	0.0272216	0.398809
finngen_R8_N14_OBSTRUREFLUROPATH	IVW	4	-0.0480825	0.0570963	0.399715
finngen_R8_F5_OTHPER	IVW	4	0.107679	0.127952	0.400034
finngen_R8_N14_FITUB	IVW	4	0.0832842	0.0991668	0.400999
finngen_R8_H8_SUP_OTINAS	IVW	4	0.148762	0.177281	0.401396
finngen_R8_H7_RETINALDETACH	IVW	4	-0.0545331	0.0650416	0.401787
finngen_R8_N14_CHRONTUBULOINTNEPHRITIS	IVW	4	0.155887	0.18604	0.402076
finngen_R8_H7_EYELIDINOTH	IVW	4	-0.165968	0.1981	0.402144
finngen_R8_J10_LOWCHRON	IVW	4	-0.0131997	0.0157599	0.402285
finngen_R8_F5_ALCOHOL_DEPENDENCE	IVW	4	0.0488562	0.058376	0.402637
finngen_R8_VOCALCORDDYS	IVW	4	0.0778664	0.093317	0.404039
finngen_R8_M13_SHORTACHILLES	IVW	4	0.177349	0.212721	0.40444
finngen_R8_H7_GLAUCCLOSEPRIM	IVW	4	-0.0714796	0.085781	0.404687
finngen_R8_PD2ND_EXMORE	IVW	4	0.170935	0.205625	0.405808
finngen_R8_F5_DEMENTIA_INCLAVO	IVW	4	0.0149385	0.0180071	0.406769
finngen_R8_C3_BREAST_HERPLUS_EXALLC	IVW	4	0.0520344	0.0627495	0.406969
finngen_R8_THYROTOXICOSIS	IVW	4	0.0399034	0.0482648	0.408374
finngen_R8_AB1_VIRAL_MENINGITIS	IVW	4	-0.089777	0.108635	0.408574
finngen_R8_H7_KERATITISINOTH	IVW	4	0.0935611	0.113439	0.409501
finngen_R8_N14_NEPHRITICNAS	IVW	4	-0.258565	0.314306	0.410705
finngen_R8_AMN2	IVW	4	-0.0943184	0.11502	0.412206
finngen_R8_F5_MIXEDDEV	IVW	4	-0.105201	0.12836	0.412459
finngen_R8_H8_HL_MIX_NAS	IVW	3	0.0811906	0.0990652	0.412463
finngen_R8_H7_EYELIDINFLAMMATION	IVW	4	0.0818485	0.0999328	0.412766
finngen_R8_F5_KELAMENT	IVW	4	0.0547267	0.0668615	0.413067
finngen_R8_H7_BLEPHAROCHALASIS	IVW	4	-0.0667647	0.0815874	0.413174
finngen_R8_CD2_BENIGN_LIPO_SKIN_HEADFACENECK	IVW	4	0.0957785	0.117131	0.413524
finngen_R8_M13_FIBROBLASTIC	IVW	4	-0.105502	0.129023	0.413531
finngen_R8_H7_STRABOTH	IVW	4	-0.0819544	0.100227	0.413536
finngen_R8_M13_DISSYNOTENDNAS	IVW	4	-0.0925453	0.113351	0.414242
finngen_R8_M13_ENTESOPATHYOTH	IVW	4	0.0407407	0.0499287	0.414513
finngen_R8_PSORI_STRICT	IVW	4	0.214244	0.262791	0.414923
finngen_R8_O15_LABOUR_OTHER	IVW	4	-0.0655509	0.0804699	0.415301
finngen_R8_K11_MALABSORB	IVW	4	0.0879709	0.108941	0.419373
finngen_R8_CD2_BENIGN_SMALL_INTESTINE	IVW	4	0.21999	0.273336	0.420915
finngen_R8_I9_ARTEMBTHR	IVW	4	0.085837	0.106719	0.421208
finngen_R8_K11_CROSSBITE	IVW	3	-0.252195	0.314468	0.422568
finngen_R8_H7_ASTIGMATISM	IVW	4	0.141115	0.175965	0.422585
finngen_R8_H7_CHORIORETINFLAM	IVW	4	0.244691	0.305524	0.423196
finngen_R8_AB1_OTHER_SEPSIS	IVW	4	-0.0346257	0.0432391	0.42325
finngen_R8_K11_SALIVARY	IVW	4	0.0500706	0.062902	0.426026
finngen_R8_H7_CONJUNCTIVITISACUNONATOPIC	IVW	4	0.00483977	0.00608801	0.426632
finngen_R8_K11_MIH_INCLAVO	IVW	4	0.143268	0.180406	0.427113
finngen_R8_O15_PREG_ECTOP	IVW	4	-0.0695807	0.0876243	0.427149
finngen_R8_MEMLOSS	IVW	4	-0.0924715	0.116502	0.427351
finngen_R8_M13_DUPUTRYEN	IVW	4	-0.113125	0.142593	0.427579
finngen_R8_D3_SCNDPOLYCYTHAEMIA	IVW	4	-0.216504	0.273102	0.42792
finngen_R8_F5_OCD	IVW	4	-0.0763995	0.0969357	0.430611
finngen_R8_K11_ABSCANAL	IVW	4	-0.0726438	0.0921892	0.430705
finngen_R8_G6_MONONPOTHUS	IVW	4	0.13543	0.172175	0.431524
finngen_R8_L12_ULCERLOWLIMB	IVW	4	0.109664	0.139586	0.43208
finngen_R8_FE	IVW	4	0.0715286	0.0911047	0.43238
finngen_R8_JUVEN_ARTHR	IVW	4	0.121721	0.155558	0.433933
finngen_R8_M13_LOWBACKPAINORANDSCIATICA	IVW	4	0.0261535	0.0334436	0.434204
finngen_R8_H8_MASTCHRON	IVW	4	-0.230932	0.297367	0.437401
finngen_R8_M13_TROCHANTERICBURSITIS	IVW	4	-0.105155	0.135665	0.438277
finngen_R8_K11_DIAHER	IVW	4	-0.0369305	0.0477281	0.439067
finngen_R8_O15_DELIV_FORCEP_VAC	IVW	4	0.0422953	0.054787	0.440118
finngen_R8_KRA_PSY_ANXIETY_EXMORE	IVW	4	-0.0160282	0.0208256	0.441515
finngen_R8_H8_HL_SEN_NAS	IVW	4	-0.0278941	0.0363819	0.443259
finngen_R8_C3_SKIN_EXALLC	IVW	4	-0.0221839	0.0289362	0.44329
finngen_R8_M13_SHOULDERNAS	IVW	4	-0.0477515	0.0623212	0.443548
finngen_R8_N14_ENDOMETRIOSIS_DEEP	IVW	4	-0.0454653	0.0593948	0.443988
finngen_R8_M13_SYNOTEND	IVW	4	-0.0348161	0.0455055	0.444214
finngen_R8_K11_EMBED_TEETH_INCLAVO	IVW	4	0.1334	0.174623	0.444908
finngen_R8_CD2_BENIGN_BRAIN_CNS	IVW	4	0.136923	0.17947	0.445506
finngen_R8_C3_DIGESTIVE_ORGANS_EXALLC	IVW	4	-0.0266412	0.0350004	0.446556
finngen_R8_CD2_BENIGN_CAECUM	IVW	4	-0.0927465	0.122396	0.448596
finngen_R8_J10_BRONCHITIS	IVW	4	-0.0286105	0.0377938	0.449041
finngen_R8_N14_GLOMEINOTH	IVW	4	-0.0664805	0.0883044	0.451537
finngen_R8_L12_OTHERSKINSUBCUTIS	IVW	4	0.0163927	0.0217744	0.451544
finngen_R8_I9_LYMPHADE	IVW	4	0.107887	0.143432	0.451942
finngen_R8_F5_MENTORG	IVW	4	0.0464682	0.062006	0.453607
finngen_R8_M13_CERVICOCRANSDR	IVW	4	0.0904742	0.120775	0.45379
finngen_R8_SCND_OTH_COXARTHROSIS	IVW	4	-0.0721271	0.096467	0.454649
finngen_R8_GE_STRICT	IVW	4	0.0933242	0.124959	0.455161
finngen_R8_CD2_FOLLICULAR_LYMPHOMA_EXALLC	IVW	4	-0.131228	0.175799	0.455386
finngen_R8_E4_HYPERALDO	IVW	4	-0.187414	0.251078	0.455403
finngen_R8_I9_CARDARR	IVW	4	0.063584	0.0852074	0.455531
finngen_R8_CD2_BENIGN_MOUTH_PHARYNX	IVW	4	-0.0610054	0.0818114	0.455859
finngen_R8_O15_EXIST_HYPERT_COMPLIC	IVW	4	-0.114218	0.15377	0.457612
finngen_R8_I9_AF_REIMB	IVW	4	0.0466698	0.0629845	0.45871
finngen_R8_N14_SALPHOOPH	IVW	4	-0.0480592	0.064923	0.459149
finngen_R8_I9_OTHPER	IVW	4	0.0676884	0.0915317	0.459598
finngen_R8_O15_PRETERM	IVW	4	0.0168932	0.0228574	0.459867
finngen_R8_N14_OTHBLADD	IVW	4	-0.0561017	0.0761446	0.461258
finngen_R8_F5_OTHERSUB	IVW	4	0.0705678	0.0959753	0.462175
finngen_R8_H7_OCUPAIN	IVW	4	-0.0916772	0.125146	0.463827
finngen_R8_H7_AMD	IVW	4	-0.0582273	0.0795978	0.464462
finngen_R8_K11_OPEN_BITE_INCLAVO	IVW	4	0.161428	0.221384	0.465893
finngen_R8_CD2_BENIGN_RECTUM_ANAL	IVW	4	-0.0728279	0.0999062	0.466025
finngen_R8_L12_EPIDERMALTHICKOTH	IVW	4	0.11468	0.157752	0.467246
finngen_R8_F5_STIMUL	IVW	4	0.129339	0.177938	0.4673
finngen_R8_I9_HYPERTROCARDMYOP	IVW	4	0.156123	0.215196	0.468148
finngen_R8_E4_DM2REN	IVW	4	-0.0443087	0.0613135	0.46989
finngen_R8_M13_MCTD	IVW	4	-0.118167	0.163648	0.470243
finngen_R8_H7_RETINOPATHYDIAB	IVW	4	0.0306152	0.0424267	0.470539
finngen_R8_GRAVES_OPHT	IVW	4	-0.119135	0.165146	0.470669
finngen_R8_F5_MOOD	IVW	4	0.0166661	0.0231581	0.471731
finngen_R8_J10_PYOTHORAX	IVW	4	-0.204741	0.284867	0.47231
finngen_R8_K11_GINGIVITIS_PERIODONTAL	IVW	4	0.00710495	0.00989623	0.472791
finngen_R8_O15_MATERN_CARE_CERVICAL_INCOMPETENCE	IVW	4	-0.174525	0.243204	0.472998
finngen_R8_N14_MALEINFERT	IVW	4	-0.103329	0.144231	0.473737
finngen_R8_Q17_VACTREL	IVW	4	-0.0431767	0.0603422	0.474282
finngen_R8_J10_ASTHMA_MAIN_EXMORE	IVW	4	-0.0157796	0.0220892	0.475007
finngen_R8_H7_INTERHETEROTRO	IVW	4	0.10432	0.146292	0.475788
finngen_R8_C3_BREAST_HERNEG_EXALLC	IVW	4	0.049179	0.0690177	0.47612
finngen_R8_M13_TENDOSYNOVITISNAS	IVW	4	-0.0436856	0.0614764	0.477327
finngen_R8_K11_FISTULA	IVW	4	0.0516525	0.0727747	0.477854
finngen_R8_O15_ICP_WIDE	IVW	3	0.110917	0.156402	0.478213
finngen_R8_I9_PROGVASC	IVW	4	0.102389	0.144402	0.478292
finngen_R8_C3_OESOPHAGUS_EXALLC	IVW	4	-0.125861	0.178634	0.481073
finngen_R8_DM_RET_VEIN_OCCLU	IVW	4	0.0738868	0.104953	0.481436
finngen_R8_AB1_ZOSTER	IVW	4	-0.0687516	0.0976612	0.481445
finngen_R8_DM_SEVERAL_COMPLICATIONS	IVW	4	0.0408506	0.058062	0.481702
finngen_R8_AUD	IVW	4	0.0242551	0.0346361	0.48375
finngen_R8_K11_ORAL_LEUCOPLAC_RELAT_INCLAVO	IVW	4	-0.0856842	0.122358	0.483754
finngen_R8_G6_ULLNLE	IVW	4	0.0611694	0.0873836	0.483921
finngen_R8_H7_EYEOTH	IVW	4	-0.0576586	0.082424	0.484217
finngen_R8_H7_BLINDANDVISIMPAIRMENT	IVW	4	-0.0524953	0.0750606	0.484319
finngen_R8_G6_BELLPA	IVW	4	0.0744838	0.107171	0.487054
finngen_R8_H7_HORDEOLUM	IVW	4	0.0996962	0.143546	0.487353
finngen_R8_K11_ERUPTION_INCLAVO	IVW	4	0.0942814	0.135815	0.487562
finngen_R8_J10_PERITONSABSC	IVW	4	-0.0648596	0.0936252	0.488461
finngen_R8_Q17_LVOTO_NARROW	IVW	4	-0.107212	0.154998	0.489126
finngen_R8_K11_IMPACTED_TEETH_INCLAVO	IVW	4	-0.0616241	0.0894336	0.490793
finngen_R8_CHRONLARGE	IVW	4	-0.0409301	0.0596389	0.492525
finngen_R8_CHIRHEP_NAS	IVW	4	0.129846	0.189469	0.493143
finngen_R8_H7_ECTROPION	IVW	4	0.126552	0.184923	0.493752
finngen_R8_M13_SPININSTAB	IVW	4	-0.106335	0.15565	0.494501
finngen_R8_K11_UC_STRICT2	IVW	4	-0.0379589	0.0556054	0.494829
finngen_R8_K11_PARODON_OPER	IVW	4	0.0209946	0.0307943	0.495386
finngen_R8_T1D_STRICT1	IVW	4	0.0330295	0.048676	0.497417
finngen_R8_AB1_ERYSIPELAS	IVW	4	0.0176582	0.0260531	0.497913
finngen_R8_C3_MELANOMA_SKIN_EXALLC	IVW	4	0.0363918	0.053809	0.498841
finngen_R8_M13_DEQUERVAIN	IVW	4	-0.113962	0.168551	0.49896
finngen_R8_L12_DECUBITANSULCERANDPRESSURE	IVW	4	0.0538463	0.0797976	0.499812
finngen_R8_G6_MEDLEOTH	IVW	4	-0.197363	0.29262	0.500013
finngen_R8_SLE_FG	IVW	4	-0.0900445	0.133641	0.500453
finngen_R8_C3_URINARY_TRACT_EXALLC	IVW	4	-0.0600209	0.0892654	0.501337
finngen_R8_COPD_LATER	IVW	4	0.0209813	0.0312466	0.501918
finngen_R8_I9_ANEURYSM	IVW	4	0.136904	0.204017	0.502195
finngen_R8_FG_CEREBVASC	IVW	4	0.0333242	0.0498558	0.503872
finngen_R8_KRA_PSY_ANYMENTAL_SUICID_PREG_NERV_EXMORE	IVW	4	0.0282453	0.0424059	0.505367
finngen_R8_L12_CHRONICULCEROFSKIN	IVW	4	0.0915218	0.137645	0.506105
finngen_R8_I9_THAORTANEUR	IVW	4	0.0465836	0.0700878	0.506277
finngen_R8_O15_GESTAT_OEDEM_PREINUR	IVW	4	0.0599383	0.0903421	0.507037
finngen_R8_H7_RETINALDISOTH	IVW	4	-0.0234178	0.0353133	0.507238
finngen_R8_F5_MOODOTH	IVW	4	0.0520245	0.0786185	0.508142
finngen_R8_K11_GALLBLAOTH	IVW	4	0.071559	0.108321	0.508858
finngen_R8_N14_ENDOMETRIOSIS_ASRM_STAGE3_4	IVW	4	-0.0427135	0.0648385	0.510045
finngen_R8_L12_FOLLICULARNAS	IVW	4	-0.0755004	0.114611	0.510053
finngen_R8_E4_DM2KETO	IVW	4	0.115292	0.175615	0.511499
finngen_R8_INFLUENZA	IVW	4	-0.0453921	0.0692208	0.51198
finngen_R8_I9_OTHILLHEART	IVW	4	-0.0715704	0.109162	0.512059
finngen_R8_O15_LABOUR_ABNORM_FORCES	IVW	4	-0.0600212	0.0916266	0.512427
finngen_R8_I9_HEARTFAIL_ALLCAUSE	IVW	4	-0.0129209	0.0197404	0.512763
finngen_R8_F5_BEHAVE	IVW	4	0.0301577	0.0461157	0.513139
finngen_R8_E4_DM1COMA	IVW	4	-0.0546287	0.0836594	0.513763
finngen_R8_N14_FIOTHNAS	IVW	4	0.0561196	0.0859991	0.51404
finngen_R8_O15_ANTENAT_ABNORM	IVW	4	-0.112516	0.173042	0.515547
finngen_R8_APPENDACUT_NOCOMPLIC	IVW	4	0.0218939	0.03389	0.51826
finngen_R8_O15_OBSTET_TRAUMA_OTHER	IVW	4	-0.0704363	0.109165	0.51878
finngen_R8_H7_RETINOPATHYDIAB_BKG_SEVERE	IVW	4	-0.108558	0.168801	0.52015
finngen_R8_K11_PULPITIS_1_ONLYAVO	IVW	4	-0.0161867	0.0251712	0.520182
finngen_R8_M13_BAKERCYST	IVW	4	-0.0956706	0.148855	0.520412
finngen_R8_AB1_STREPTO_SEPSIS	IVW	4	0.0811282	0.126513	0.521351
finngen_R8_CD2_MYELOID_LEUKAEMIA_EXALLC	IVW	4	-0.0797848	0.124556	0.521812
finngen_R8_C3_LUNG_NONSMALL_EXALLC	IVW	4	-0.0355296	0.0554756	0.521877
finngen_R8_N14_HYDROCELE	IVW	4	0.0397931	0.0622741	0.522823
finngen_R8_OTHER_SYSTCON_FG	IVW	4	-0.032205	0.0509792	0.527564
finngen_R8_RX_INFERTILITY	IVW	4	0.045337	0.0720856	0.529393
finngen_R8_I9_CARDMYO	IVW	4	0.0283407	0.0451215	0.52994
finngen_R8_M13_SPONDYLOLISTHESIS	IVW	4	-0.0474985	0.0756551	0.530116
finngen_R8_L12_PRURITUS	IVW	4	0.0527766	0.0840737	0.530173
finngen_R8_M13_SOFTOVERUSE	IVW	4	-0.0599959	0.0955896	0.530239
finngen_R8_I9_HEARTFAIL_NS	IVW	4	-0.0102414	0.0163522	0.531115
finngen_R8_N14_SPERMATOCELE	IVW	4	-0.0762763	0.121848	0.531318
finngen_R8_CD2_BENIGN_RECTUM	IVW	4	-0.0637574	0.102132	0.532453
finngen_R8_N14_IMPOTENCE	IVW	4	0.0932419	0.149842	0.533764
finngen_R8_K11_OTHINT	IVW	4	-0.0495797	0.0796999	0.533889
finngen_R8_HERING_UNILATERAL	IVW	4	0.0710465	0.114735	0.53577
finngen_R8_K11_POSTOPDIS	IVW	4	0.180678	0.292109	0.536227
finngen_R8_N14_BARTHOOTHNAS	IVW	4	0.109935	0.178438	0.537829
finngen_R8_D3_ANAEMIA_IRONDEF	IVW	4	0.03327	0.0540286	0.538036
finngen_R8_N14_MENSIRREG	IVW	4	0.0215419	0.0349963	0.538193
finngen_R8_K11_FUNCDYSP	IVW	4	0.0270551	0.0440137	0.538754
finngen_R8_M13_DORSOPATHYNAS	IVW	4	0.110446	0.181266	0.542323
finngen_R8_ILD	IVW	4	0.0565259	0.0929151	0.542949
finngen_R8_ILD_ENDPOINTS	IVW	4	0.0565259	0.0929151	0.542949
finngen_R8_E4_VOLUME	IVW	4	0.0556597	0.0916869	0.543809
finngen_R8_Q17_CONGEN_DEFORMITI_FEET	IVW	3	0.172037	0.28458	0.545492
finngen_R8_L12_BULLOUS	IVW	4	-0.117628	0.195181	0.546733
finngen_R8_CD2_BENIGN_LIP	IVW	4	0.128074	0.213263	0.548143
finngen_R8_H7_GLAUCSUSP	IVW	4	0.0296072	0.0493315	0.548395
finngen_R8_H7_VISFIELDDEF	IVW	4	0.0738101	0.123076	0.5487
finngen_R8_L12_ALOPECAREATA	IVW	4	-0.140289	0.233985	0.548797
finngen_R8_L12_FOODDERMAT	IVW	4	-0.0778608	0.130449	0.550595
finngen_R8_H7_CONJUHAEMOR	IVW	4	-0.0462232	0.0779703	0.553295
finngen_R8_K11_MAJOR_ANOMALI_JAW_SIZE_INCLAVO	IVW	4	0.146819	0.24816	0.554099
finngen_R8_ILD_INSUFFICIENCY	IVW	4	0.081682	0.138452	0.555214
finngen_R8_K11_FIBROCHIRLIV	IVW	4	0.0917333	0.15549	0.555216
finngen_R8_H7_CORNULCER	IVW	4	0.0542696	0.0925817	0.557754
finngen_R8_CD2_BENIGN_THYROID	IVW	4	0.141495	0.243588	0.561324
finngen_R8_G6_ROOTPLEXOTHUNS	IVW	4	0.0541056	0.0932023	0.561565
finngen_R8_H7_ALLERGICCONJUNCTIVITIS	IVW	4	0.0210389	0.0363203	0.562414
finngen_R8_N14_PROHERNOV	IVW	4	-0.0676639	0.117122	0.563452
finngen_R8_M13_TIETZE	IVW	4	-0.135031	0.234332	0.564453
finngen_R8_C3_NSCLC_SQUAM_EXALLC	IVW	4	0.121161	0.210718	0.565299
finngen_R8_POLYCYTVERA	IVW	4	-0.151674	0.265064	0.567176
finngen_R8_K11_APHTA_RECUR	IVW	4	-0.082618	0.144781	0.568243
finngen_R8_N14_ENDOMETRIOSIS	IVW	4	-0.0344106	0.0603636	0.568641
finngen_R8_KRA_PSY_SCHIZODEL_EXMORE	IVW	2	0.041556	0.0729217	0.568765
finngen_R8_I9_PHLETHROMBDVTLOW	IVW	4	-0.0455618	0.080006	0.56903
finngen_R8_H8_NOISEINNER	IVW	4	0.0354382	0.0622412	0.569106
finngen_R8_ASTHMA_NAS	IVW	4	-0.017839	0.031573	0.572067
finngen_R8_H8_VESTIFUNCNAS	IVW	4	0.138397	0.245663	0.57319
finngen_R8_M13_SACROILIITIS	IVW	4	0.136783	0.2431	0.573664
finngen_R8_O15_ICP_EXMORE	IVW	4	0.0791941	0.140815	0.573844
finngen_R8_SLE_STRICT	IVW	4	-0.083744	0.149006	0.574105
finngen_R8_K11_LIVER	IVW	4	-0.0526727	0.0937393	0.57418
finngen_R8_CD2_BENIGN_MELANOCYTIC	IVW	4	-0.0327066	0.0582594	0.574527
finngen_R8_K11_CARIES_2	IVW	4	-0.0205782	0.0367304	0.575309
finngen_R8_N14_ENDOMETRIOSIS_PELVICPERITONEUM	IVW	4	-0.0464134	0.082986	0.575962
finngen_R8_COPD_INSUFFICIENCY	IVW	4	0.0681924	0.121934	0.575988
finngen_R8_L12_ERYTHEMAMULTIF	IVW	4	0.174295	0.312946	0.577561
finngen_R8_DM_RETINOPATHY_EXMORE	IVW	4	0.0181089	0.0325751	0.57827
finngen_R8_G6_MERALGIA	IVW	4	0.135717	0.244241	0.578437
finngen_R8_FE_STRICT	IVW	4	0.0487704	0.0878014	0.578578
finngen_R8_E4_MINERAL_MET	IVW	4	-0.0902878	0.162727	0.579003
finngen_R8_CIRRHOSIS_BROAD	IVW	4	-0.0597592	0.10778	0.579267
finngen_R8_N14_POSTMENATRVAG	IVW	4	0.0672181	0.121474	0.58002
finngen_R8_J10_CHRONLARYNGITIS	IVW	4	-0.0456144	0.0824695	0.580191
finngen_R8_N14_OTHPENIS	IVW	4	-0.0498143	0.090325	0.581291
finngen_R8_M13_ADHCAPSULITIS	IVW	4	-0.0346694	0.0628841	0.581412
finngen_R8_AB1_GONOCOCCAL	IVW	4	-0.177252	0.321833	0.581799
finngen_R8_MACULA_NAS	IVW	4	0.0731365	0.133074	0.582599
finngen_R8_H7_CONJUNCTIVITIS	IVW	4	0.0123677	0.0225782	0.583849
finngen_R8_J10_UPPERDIS	IVW	4	-0.0106542	0.0194801	0.584431
finngen_R8_K11_OTHFUNC	IVW	4	-0.0163186	0.0298678	0.584819
finngen_R8_H7_CONVERSTRAB	IVW	4	-0.0623941	0.114383	0.585421
finngen_R8_M13_JUVERHEU	IVW	4	0.0763486	0.139979	0.585458
finngen_R8_N14_OTHNONINFVULV	IVW	4	0.0585527	0.107655	0.586514
finngen_R8_K11_DEPOSITS	IVW	4	0.0878201	0.162291	0.58842
finngen_R8_M13_CARTILAGE	IVW	4	0.0661479	0.122306	0.588618
finngen_R8_I9_HEARTFAIL_AND_CHD	IVW	4	-0.0245251	0.0453816	0.588908
finngen_R8_CONGEN_HEART_ARTER	IVW	4	0.0455346	0.0843611	0.589364
finngen_R8_L12_INFECT_DERM	IVW	4	-0.0376716	0.0699883	0.5904
finngen_R8_CD2_BENIGN_LIPO_SKIN_LIMBS	IVW	4	-0.0635004	0.117985	0.590433
finngen_R8_G6_SLEEPDISOTH	IVW	4	0.0661683	0.122987	0.590568
finngen_R8_H7_RETIVASCOCCLUSION	IVW	4	-0.051693	0.0962656	0.591279
finngen_R8_E4_HYPERPARA	IVW	4	-0.0401186	0.0748142	0.591791
finngen_R8_I9_VASCINT	IVW	4	0.069914	0.130887	0.593234
finngen_R8_O15_POLYHYDR	IVW	4	-0.0843442	0.158015	0.593498
finngen_R8_E4_FH	IVW	4	-0.0731305	0.137089	0.593719
finngen_R8_I9_AORTANEUR	IVW	4	0.0429618	0.0806887	0.594422
finngen_R8_I9_UAP	IVW	4	-0.0210515	0.0395482	0.594517
finngen_R8_O15_PREG_GU_INFECT	IVW	4	0.0627443	0.117898	0.594593
finngen_R8_C3_DLBCL_EXALLC	IVW	4	-0.0763725	0.143661	0.594993
finngen_R8_HLP_C3_DLBCL	IVW	4	-0.0763616	0.143648	0.595011
finngen_R8_H7_GLAUCOMA	IVW	4	0.0155318	0.0293075	0.59614
finngen_R8_J10_ASTHMACOPDKELA	IVW	4	-0.0159931	0.0302312	0.596788
finngen_R8_ASTHMA_ALLERG	IVW	4	-0.0289313	0.0547477	0.597189
finngen_R8_H8_EXT_NAS	IVW	4	-0.0552853	0.105037	0.59865
finngen_R8_O15_LABOUR_INTRAPART_HAEMORRH	IVW	3	0.0816517	0.15527	0.598979
finngen_R8_I9_SEQULAE	IVW	4	-0.0436351	0.0833868	0.600776
finngen_R8_CD2_BENIGN_TRANSVERSE_COLON	IVW	4	0.0762878	0.145985	0.601272
finngen_R8_DM_NEOVASCULAR_GLAUCOMA	IVW	4	0.0378409	0.0724838	0.601629
finngen_R8_ST19_FRACT_FEMUR	IVW	4	0.0307166	0.0588909	0.60196
finngen_R8_AB1_VIRAL_CNS	IVW	4	-0.0614735	0.118134	0.602805
finngen_R8_M13_OTHERJOINT	IVW	4	0.0115972	0.0223859	0.604417
finngen_R8_K11_DENTOFACIAL_ANOMALIES	IVW	4	-0.0419445	0.0811968	0.605451
finngen_R8_F5_DEMENTIA	IVW	4	0.0128239	0.0248277	0.605495
finngen_R8_ST19_TOXIC_EFFECT_ALCOHOL	IVW	4	0.0875407	0.169569	0.605677
finngen_R8_K11_ORALCYST	IVW	4	-0.083809	0.162424	0.605862
finngen_R8_G6_MYONEU	IVW	4	0.0162149	0.0315363	0.607137
finngen_R8_O15_PREECLAMPS	IVW	4	-0.0419199	0.0815321	0.607146
finngen_R8_RX_PARACETAMOL_NSAID	IVW	4	0.0155983	0.0304915	0.608957
finngen_R8_M13_MYALGIA	IVW	4	-0.033816	0.0662097	0.609533
finngen_R8_K11_CD_STRICT2	IVW	4	0.0179232	0.0352986	0.611622
finngen_R8_I9_K_CARDIAC	IVW	4	0.0108327	0.0213448	0.611798
finngen_R8_J10_ASTHMA_EXMORE	IVW	4	-0.00971944	0.0191884	0.612486
finngen_R8_F5_SOCPHOB	IVW	4	0.0840878	0.166422	0.61337
finngen_R8_I9_HEARTFAIL_EXMORE	IVW	4	-0.0103889	0.0206326	0.614598
finngen_R8_K11_LIP_ORAL_MUCOSA	IVW	4	-0.0480827	0.0957932	0.615708
finngen_R8_N14_ENDOMETRIOSIS_ASRM_STAGE1_2	IVW	4	-0.0336347	0.0670662	0.616009
finngen_R8_N14_BENIGNMAMDYSP	IVW	4	-0.0326196	0.0650752	0.616189
finngen_R8_J10_CHRONTONSADEN	IVW	4	-0.0157316	0.031462	0.61706
finngen_R8_H8_EUSTSALP	IVW	4	0.0238874	0.0478353	0.61752
finngen_R8_C3_BRONCHUS_LUNG_EXALLC	IVW	4	-0.0249368	0.0500771	0.618506
finngen_R8_M13_POLYARTHROPATHIES	IVW	4	-0.0114489	0.0230428	0.619291
finngen_R8_M13_SPONDYLOSIS	IVW	4	-0.0226749	0.0460324	0.622305
finngen_R8_M13_PATELLADISLOCATIO	IVW	4	0.0420541	0.0854779	0.622728
finngen_R8_DM_VITREOUS_BLEEDING	IVW	4	-0.0554174	0.113009	0.623865
finngen_R8_K11_TEETH_HARD	IVW	4	-0.0584604	0.119317	0.624162
finngen_R8_D3_IMMUNEMECHANISM	IVW	4	-0.0384737	0.0787203	0.625026
finngen_R8_G6_DYSTON	IVW	4	0.105935	0.219245	0.628966
finngen_R8_H7_REFRAACCOMMODIS	IVW	4	0.0278429	0.0576383	0.629052
finngen_R8_K11_CARIES_1_ONLYAVO	IVW	4	0.00703858	0.0145883	0.629465
finngen_R8_VD_SC	IVW	4	-0.153556	0.3189	0.630149
finngen_R8_K11_MAXIL_MOLAR_FAILED_ERUPT_OBSTRUCTION_TOOTH	IVW	4	-0.0255177	0.0531315	0.631033
finngen_R8_K11_BILIAOTH	IVW	4	0.0503226	0.104903	0.631436
finngen_R8_F5_STRESSOTH	IVW	4	-0.0209487	0.0440551	0.634423
finngen_R8_J10_SIMPLBRONCH	IVW	4	0.0696735	0.146747	0.634939
finngen_R8_O15_MAT_CARE_MALPRESENT	IVW	4	-0.0242679	0.0512204	0.635647
finngen_R8_F5_MILDRET	IVW	4	0.139626	0.295286	0.636321
finngen_R8_T1D_EARLY	IVW	4	0.0480741	0.101862	0.636961
finngen_R8_I9_OTHARR	IVW	4	0.0209822	0.0446663	0.63853
finngen_R8_K11_HYPO_ONLY_INCLAVO	IVW	4	0.0836051	0.17885	0.640171
finngen_R8_G6_PLANTAR	IVW	4	0.0591316	0.127631	0.643149
finngen_R8_H7_ANISOMETROPIA	IVW	4	0.0704021	0.152454	0.644231
finngen_R8_N14_BREASTDISOTH	IVW	4	0.0183251	0.039762	0.644891
finngen_R8_APPENDICITIS_BROAD	IVW	4	-0.00863309	0.0187593	0.64537
finngen_R8_CD2_BENIGN_STOMACH	IVW	4	-0.0542508	0.118253	0.646401
finngen_R8_L12_ATROPHICSKIN	IVW	4	0.0372925	0.0814726	0.647146
finngen_R8_J10_PNEUMONIA	IVW	4	0.00840006	0.0183624	0.64734
finngen_R8_C3_CANCER_EXALLC	IVW	4	0.00552373	0.0120807	0.647501
finngen_R8_K11_OTHDISOES	IVW	4	0.0398423	0.0872178	0.647805
finngen_R8_ALCODELIRIUM	IVW	4	-0.0391977	0.0858178	0.647847
finngen_R8_R18_RETEN_URINE	IVW	4	-0.0202989	0.0444892	0.648199
finngen_R8_KRA_PSY_CHILDOTH_EXMORE	IVW	4	0.0586228	0.128761	0.648906
finngen_R8_M13_TOEDEFORMOTH	IVW	4	0.105059	0.231379	0.649788
finngen_R8_K11_CHRONHEP	IVW	4	-0.146847	0.323752	0.650131
finngen_R8_N14_EROSECTROPUT	IVW	4	0.0631131	0.139296	0.650487
finngen_R8_GOUT_NOS	IVW	4	0.0377468	0.0835582	0.651454
finngen_R8_M13_FOREIGNBODY	IVW	4	0.100568	0.222785	0.651691
finngen_R8_G6_AD_WIDE	IVW	4	0.00708521	0.0156975	0.65173
finngen_R8_M13_ENTESOPATHYNAS	IVW	4	0.0378953	0.0847849	0.654905
finngen_R8_M13_POLYMYALGIA	IVW	4	-0.0438969	0.0984218	0.655592
finngen_R8_N14_LUMPNASBREAST	IVW	4	-0.027291	0.0613172	0.656263
finngen_R8_TRAUMBRAIN_NONCONCUS	IVW	4	-0.0314967	0.0708592	0.656684
finngen_R8_J10_INFLUENZA	IVW	4	-0.0269125	0.0606644	0.657311
finngen_R8_ST19_FRACT_SKULL_FACIAL_BONES	IVW	3	0.0405754	0.091637	0.657922
finngen_R8_Q17_CONGEN_MALFO_GENITAL_ORGANS	IVW	4	0.0290123	0.0655752	0.65818
finngen_R8_N14_UTER_POLYP	IVW	4	-0.0628942	0.142434	0.658802
finngen_R8_L12_INFECT_SKIN_OTHER	IVW	4	-0.0350311	0.0793825	0.658999
finngen_R8_K11_ADHE	IVW	4	-0.0226961	0.0514743	0.659269
finngen_R8_M13_INTERVERTEB	IVW	4	-0.0233177	0.0529101	0.659427
finngen_R8_POLLENALLERG	IVW	4	-0.022915	0.0522062	0.66071
finngen_R8_K11_COELIAC	IVW	4	0.0385514	0.0878946	0.660945
finngen_R8_H7_VITROPACIT	IVW	4	-0.0757422	0.172857	0.661257
finngen_R8_I9_HYPOTE	IVW	4	0.0567489	0.130408	0.663442
finngen_R8_O15_COMPLIC_ABORT_ECTOP_MOLAR	IVW	4	-0.0874643	0.20103	0.663503
finngen_R8_MACULAR_HOLE	IVW	4	-0.0584055	0.134334	0.663724
finngen_R8_H7_RETINOPATHYDIAB_PROLIF	IVW	4	-0.0362231	0.0833644	0.663914
finngen_R8_CD2_BENIGN_LIPO_SKIN_TRUNK	IVW	4	0.0435387	0.100254	0.664084
finngen_R8_H8_EXTDISNAS	IVW	4	-0.0240687	0.0554977	0.664515
finngen_R8_D3_ANAEMIA_IRONDEF_NAS	IVW	4	-0.0190605	0.0440831	0.665467
finngen_R8_C3_COLORECTAL_EXALLC	IVW	4	0.0310451	0.0718054	0.665486
finngen_R8_AB1_HEPATITIS_OTHER_VIRAL	IVW	4	0.0700099	0.162237	0.666085
finngen_R8_I9_IHD	IVW	3	0.0198725	0.0461682	0.666877
finngen_R8_VWXY20_SUICI_OTHER_INTENTI_SELF_H	IVW	4	0.0395006	0.0918382	0.667115
finngen_R8_O15_HYPTENSPREG	IVW	4	-0.0260626	0.0607946	0.668142
finngen_R8_K11_TOOTH_DEV	IVW	4	-0.0823386	0.192885	0.669467
finngen_R8_H8_OTOSCLE	IVW	4	-0.0303869	0.0711845	0.669471
finngen_R8_J10_VIRALPNEUMO	IVW	4	0.0485743	0.114607	0.671687
finngen_R8_D3_IMMUDEF	IVW	4	-0.0829831	0.195945	0.671929
finngen_R8_K11_DULC	IVW	4	0.0431437	0.101923	0.67208
finngen_R8_G6_SPINOTH	IVW	4	0.118	0.279548	0.672944
finngen_R8_E4_GRAVES_STRICT	IVW	4	-0.0603849	0.14306	0.672956
finngen_R8_G6_MONOOTHUNS	IVW	4	0.0987615	0.234723	0.673932
finngen_R8_O15_FALSE_LAB	IVW	4	0.0092155	0.0219025	0.673936
finngen_R8_D3_OTHERBLOOD	IVW	4	-0.0561808	0.134183	0.675445
finngen_R8_I9_CONDUCTIO	IVW	4	0.0239083	0.0572387	0.67617
finngen_R8_ASTHMA_OBESITY	IVW	4	0.0071658	0.0171638	0.676317
finngen_R8_L12_SEBORRHOEIC	IVW	4	-0.0243012	0.0582095	0.676328
finngen_R8_N14_BARTHOCYS	IVW	4	0.0895513	0.215168	0.677269
finngen_R8_K11_DISLIVOTH	IVW	4	0.0451825	0.108979	0.678436
finngen_R8_M13_GIANTCELL	IVW	4	-0.063317	0.153099	0.67919
finngen_R8_RX_ANTIHYP	IVW	4	0.00650326	0.0157708	0.680074
finngen_R8_TONGUEABNORMALITY	IVW	4	-0.0523708	0.127416	0.681057
finngen_R8_CD2_BENIGN_BONE_LONG_LOWER	IVW	4	-0.0518508	0.12679	0.682577
finngen_R8_K11_APPENDACUT	IVW	4	-0.00934312	0.0229025	0.683309
finngen_R8_H7_RETINALBREAK	IVW	4	-0.0352417	0.08649	0.683666
finngen_R8_M13_MONOARTHRITIS	IVW	4	0.0224914	0.0554689	0.685127
finngen_R8_RHEUMA_OTHER_WIDE	IVW	4	-0.0129783	0.0320965	0.685954
finngen_R8_AUD_SWEDISH	IVW	4	-0.00660091	0.0163792	0.686945
finngen_R8_AB1_HERPES_SIMPLEX	IVW	4	-0.0413764	0.102995	0.68788
finngen_R8_L12_HYPETROPHICSCAR	IVW	4	-0.0596079	0.148404	0.687935
finngen_R8_F5_SCHOLA	IVW	4	-0.0791766	0.198001	0.689245
finngen_R8_H7_LACRIMALSYSTEM	IVW	4	0.0115596	0.0289747	0.689928
finngen_R8_J10_BRONCHNAS	IVW	4	-0.0425811	0.107394	0.69174
finngen_R8_O15_MATERN_CARE	IVW	4	0.0113063	0.0285301	0.691888
finngen_R8_K11_DISTAL_BITE_INCLAVO	IVW	4	0.0978549	0.24786	0.692991
finngen_R8_K11_VOLVU	IVW	4	-0.0351405	0.0892285	0.693709
finngen_R8_D3_ACUTEPOSTBLEEDANAEMIA	IVW	4	0.0673469	0.171417	0.694405
finngen_R8_G6_FACOTH	IVW	4	-0.0847581	0.216158	0.694976
finngen_R8_D3_PURPURA_AND3_OTHER_HAEMORRHAGIC	IVW	4	0.0458379	0.117029	0.695294
finngen_R8_H7_CORNEALNAS	IVW	4	-0.088186	0.225188	0.695346
finngen_R8_IPF	IVW	2	-0.0491653	0.12587	0.696091
finngen_R8_M13_SPONDYLOPATHY	IVW	4	-0.0183068	0.0470391	0.697141
finngen_R8_KRA_PSY_SPEELING_EXMORE	IVW	4	0.0550413	0.141559	0.697408
finngen_R8_F5_PSYTRANS	IVW	4	0.0414547	0.107277	0.699181
finngen_R8_O15_MULTIP_GEST	IVW	4	0.0468115	0.121184	0.699287
finngen_R8_N14_PYELONEPHR	IVW	4	0.023945	0.062119	0.699889
finngen_R8_M13_BIOMECHLESIO	IVW	4	0.0878173	0.228557	0.700812
finngen_R8_G6_NEUROOTH	IVW	4	-0.0545106	0.142047	0.701164
finngen_R8_VIRALPNEUMONAS	IVW	4	0.0602247	0.157932	0.702955
finngen_R8_Q17_CONGEN_MALFO_DEFORMAT_MUSCULOS_SYSTEM	IVW	4	0.0539799	0.141581	0.703007
finngen_R8_M13_CHONDROMALACIA	IVW	4	0.0677606	0.178248	0.703835
finngen_R8_C3_MALE_GENITAL_EXALLC	IVW	4	-0.00783029	0.0206884	0.705069
finngen_R8_G6_EPIPAROX	IVW	4	-0.00890292	0.0237743	0.70805
finngen_R8_GOUT_STRICT	IVW	4	0.0359774	0.0963708	0.708909
finngen_R8_H8_MENIERE	IVW	4	-0.0322103	0.0863779	0.709223
finngen_R8_L12_ACNE	IVW	4	0.0470565	0.128676	0.71459
finngen_R8_J10_SINUSITIS	IVW	4	-0.0165865	0.0457629	0.71702
finngen_R8_L12_ROSACEANAS	IVW	4	-0.0476131	0.131442	0.717176
finngen_R8_CD2_BENIGN_LARYNX	IVW	4	0.0754918	0.208664	0.717512
finngen_R8_E4_HYPOKALAEMIA	IVW	4	-0.0192195	0.0532033	0.717915
finngen_R8_H7_CHALAZION	IVW	4	-0.0524504	0.145914	0.71925
finngen_R8_O15_ANTEPART_HAEM_NAS	IVW	4	0.0547113	0.152711	0.720143
finngen_R8_H7_MACULADEGEN	IVW	4	-0.0198059	0.0553406	0.720425
finngen_R8_O15_TWIN_GEST	IVW	4	0.0425434	0.118978	0.720661
finngen_R8_H7_GLAUCNAS	IVW	4	-0.0286291	0.0802074	0.721138
finngen_R8_K11_INTESTOTH	IVW	4	0.00932727	0.0262461	0.722306
finngen_R8_K11_EROSION_INCLAVO	IVW	4	-0.0287084	0.0807987	0.722359
finngen_R8_E4_NONTOXIC_THYROID	IVW	4	0.016653	0.0471023	0.723676
finngen_R8_L12_ATOPIC	IVW	4	0.024281	0.0688871	0.724482
finngen_R8_N14_FEMALEGENINF	IVW	4	-0.0203489	0.0577545	0.724588
finngen_R8_CD2_BENIGN_TONGUE	IVW	4	0.0336868	0.0962527	0.726352
finngen_R8_K11_ORAL_LICHEN_PLANUS_WIDE	IVW	4	0.00942996	0.0269469	0.72638
finngen_R8_K11_OESSTODUO	IVW	4	0.00549555	0.0157097	0.726475
finngen_R8_J10_PLEURA	IVW	3	-0.0183179	0.0525424	0.727366
finngen_R8_M13_DORSALGIA	IVW	4	-0.0091556	0.0262743	0.727493
finngen_R8_H7_OCUMUSCLE	IVW	4	-0.0235832	0.0677301	0.727695
finngen_R8_O15_POSTPART_HEAMORRH_ALLW	IVW	4	-0.00573488	0.0164846	0.727921
finngen_R8_I9_STR	IVW	4	0.0118041	0.0339459	0.728041
finngen_R8_KRA_PSY_MOOD_EXMORE	IVW	4	0.00678427	0.0197853	0.731677
finngen_R8_I9_AF	IVW	4	0.0103052	0.030068	0.7318
finngen_R8_E4_SHORT	IVW	4	-0.115124	0.337952	0.733366
finngen_R8_K11_DIVERTIC	IVW	4	-0.00995976	0.0292443	0.733426
finngen_R8_E4_HYPERPIT	IVW	4	0.0505084	0.148749	0.734192
finngen_R8_E4_OBESITYXTRMALV	IVW	3	-0.0587475	0.173132	0.734367
finngen_R8_H7_ENTROPION	IVW	4	0.0608693	0.179396	0.734382
finngen_R8_G6_ALZHEIMER	IVW	4	-0.018218	0.0537322	0.73457
finngen_R8_E4_GOITRENAS	IVW	4	0.0170517	0.0503374	0.7348
finngen_R8_RHEUMA_SEROPOS	IVW	4	-0.0169503	0.0501175	0.735204
finngen_R8_L12_URTICA_NAS	IVW	4	0.0179977	0.0532328	0.735292
finngen_R8_KRA_PSY_MENTALRET_EXMORE	IVW	4	0.0877601	0.259821	0.735536
finngen_R8_N14_PROSTAOTH	IVW	4	-0.0284935	0.0847657	0.736763
finngen_R8_H7_GLAUCOMA_XFG	IVW	4	0.0165291	0.0493455	0.737651
finngen_R8_K11_ENERCOLNONINF	IVW	4	-0.00844807	0.0252396	0.737841
finngen_R8_M13_ENTESOPATHYLOWNAS	IVW	4	0.065006	0.195704	0.739765
finngen_R8_RHEUMA_NOS	IVW	4	0.0202929	0.0611335	0.739932
finngen_R8_F5_PHOBANX	IVW	4	-0.0295786	0.0892263	0.740266
finngen_R8_TEMPOROMANDIB	IVW	4	-0.0222623	0.0672257	0.740525
finngen_R8_E4_ENDODIS	IVW	4	0.0521859	0.157929	0.741068
finngen_R8_MUCOPROCT	IVW	4	-0.0299905	0.0908255	0.74125
finngen_R8_GE_MODE	IVW	4	-0.0493173	0.149576	0.741617
finngen_R8_J10_PNEUMOBACT	IVW	4	-0.013639	0.0414228	0.741956
finngen_R8_AB1_OTHER_BACTERIAL	IVW	4	-0.00613552	0.0186702	0.742438
finngen_R8_AD_EO_EXMORE	IVW	4	-0.0606798	0.185315	0.743334
finngen_R8_CD2_HODGKIN_LYMPHOMA_EXALLC	IVW	4	0.0672543	0.20543	0.743378
finngen_R8_C3_CORPUS_UTERI_EXALLC	IVW	4	0.0725161	0.221568	0.743452
finngen_R8_M13_NEURALGIA	IVW	4	0.0718099	0.219729	0.743811
finngen_R8_Q17_CONGEN_MALFO_GREAT_ARTERIES	IVW	4	-0.0944203	0.290004	0.74474
finngen_R8_K11_HAEMORR	IVW	4	0.0331223	0.102141	0.745726
finngen_R8_SPONDYLOPATHY_FG	IVW	4	0.0415161	0.128355	0.746356
finngen_R8_I9_DVTANDPULM	IVW	4	0.0149004	0.0461144	0.746605
finngen_R8_N14_OTHDISMALEGEN	IVW	4	0.0246308	0.0763211	0.746903
finngen_R8_F5_NEUROTICOTH	IVW	4	0.0510586	0.158292	0.747028
finngen_R8_K11_UMBHER	IVW	2	-0.020121	0.0624863	0.747448
finngen_R8_KRA_PSY_SUBSTANCE_EXMORE	IVW	4	0.00918504	0.0286482	0.748502
finngen_R8_Q17_OTHER_CONGEN_MALFO	IVW	4	0.0243917	0.0765163	0.749895
finngen_R8_M13_EARLY_LUMBAR_PROLAPSE	IVW	4	0.0311861	0.0982952	0.751039
finngen_R8_L12_DISORDSKINAPPENDIX	IVW	4	-0.0153249	0.0483872	0.751462
finngen_R8_SMOKING	IVW	3	0.0340312	0.107809	0.752259
finngen_R8_F5_ADHD	IVW	4	0.0301492	0.0956224	0.752538
finngen_R8_I9_HYPTENSRD	IVW	4	0.0428832	0.136503	0.753404
finngen_R8_E4_GOITRENOD	IVW	4	-0.0270469	0.0862272	0.753772
finngen_R8_M13_HAMMERTOE	IVW	4	0.0261713	0.0845761	0.756986
finngen_R8_L12_SKINSUBCUTISNAS	IVW	4	0.0386178	0.124822	0.75703
finngen_R8_E4_HYPERCHOL	IVW	4	-0.0100282	0.0324517	0.757308
finngen_R8_M13_DORSOPATHYOTH	IVW	4	-0.00983416	0.031826	0.757323
finngen_R8_O15_PREEC_OR_FETGRO	IVW	4	-0.0168735	0.0548113	0.758198
finngen_R8_CARDIAC_ARRHYTM	IVW	4	0.00595828	0.0193855	0.758571
finngen_R8_I9_OTHOTH	IVW	4	0.0468818	0.152791	0.758967
finngen_R8_K11_OESULC	IVW	4	-0.0239835	0.0790574	0.76161
finngen_R8_THYROIDITIS	IVW	3	-0.0670326	0.221069	0.761722
finngen_R8_VD_U	IVW	4	0.0633584	0.208978	0.761751
finngen_R8_N14_CYSTKID	IVW	4	0.0656539	0.216921	0.762147
finngen_R8_N14_CYSTITIS	IVW	4	0.0205937	0.0680968	0.762333
finngen_R8_K11_HEPFAIL	IVW	4	-0.0379659	0.125544	0.762339
finngen_R8_G6_TRINEU	IVW	4	-0.0571138	0.189598	0.763234
finngen_R8_O15_EXCESS_VOMIT_PREG	IVW	4	-0.0248218	0.0828244	0.764412
finngen_R8_N14_BREAST	IVW	4	-0.00964457	0.0322118	0.764627
finngen_R8_M13_OLECRANONBURSITIS	IVW	4	0.037472	0.125356	0.764998
finngen_R8_N14_DISIMPAIRRENTUB	IVW	4	-0.0777246	0.260276	0.765227
finngen_R8_E4_DM2OPTH	IVW	4	0.0254746	0.0858642	0.766707
finngen_R8_I9_ANGINA	IVW	3	0.0186442	0.0629508	0.7671
finngen_R8_O15_COMPLIC_PUERP	IVW	4	-0.0286804	0.096913	0.767276
finngen_R8_H7_VERTISTRAB	IVW	4	-0.0638198	0.216908	0.768586
finngen_R8_DRUGADVERS_NEUTROPENIA	IVW	4	-0.045631	0.156671	0.770858
finngen_R8_AB1_PROTOZOAL	IVW	4	0.0846842	0.291627	0.771522
finngen_R8_CD2_BENIGN_FEMALE_GEN_OTH	IVW	4	0.0413909	0.14268	0.771743
finngen_R8_H7_CONJUVASC	IVW	4	0.0703128	0.242832	0.772158
finngen_R8_Q17_CRANIOSYNOSTOSIS	IVW	3	0.0895088	0.309732	0.77259
finngen_R8_K11_CHOLECYSTECTOMY	IVW	4	-0.00597846	0.0208158	0.773953
finngen_R8_F5_BEHEMOCHILD	IVW	4	-0.0197617	0.0688906	0.774223
finngen_R8_J10_COLD	IVW	4	-0.0307345	0.107708	0.775377
finngen_R8_ANTIDEPRESSANTS	IVW	4	0.00895897	0.0316976	0.777454
finngen_R8_N14_OTHFEMPELINF	IVW	4	-0.0344086	0.121926	0.777784
finngen_R8_M13_CERVICALGIA	IVW	4	-0.0221235	0.0786662	0.778532
finngen_R8_K11_IBS	IVW	4	-0.0146284	0.0526505	0.781136
finngen_R8_AB1_MYCOSES	IVW	4	0.0114643	0.0413573	0.781626
finngen_R8_M13_OSTEONECROSIS	IVW	4	-0.0475442	0.171898	0.7821
finngen_R8_DRY_AMD	IVW	4	-0.0203553	0.0739309	0.783064
finngen_R8_K11_OTHABDHER	IVW	4	-0.0572291	0.207863	0.78307
finngen_R8_AB1_CHLAMYDIA_OTHER	IVW	4	0.0430014	0.156357	0.783301
finngen_R8_E4_DMNAS	IVW	4	0.0217445	0.0791295	0.783473
finngen_R8_K11_GULC	IVW	4	0.0102309	0.0375679	0.785367
finngen_R8_M13_SYSTSLCE	IVW	4	0.0680408	0.252318	0.78742
finngen_R8_Q17_CONGEN_MALFO_CIRCULATO_SYSTEM	IVW	4	-0.0221617	0.0821947	0.78745
finngen_R8_O15_MEMBR_PREMAT_RUPT	IVW	4	-0.0140528	0.0522431	0.787939
finngen_R8_N14_FEMGENPROL	IVW	4	0.0114653	0.0429125	0.789332
finngen_R8_ST19_FRACT_FOREA	IVW	4	-0.015843	0.0598743	0.791315
finngen_R8_K11_MISS_TEETH_ACCID_EXTR_PAROD	IVW	4	0.0153268	0.0581951	0.792266
finngen_R8_M13_POSTOPMUSCULOSKE	IVW	4	-0.0330469	0.12551	0.792318
finngen_R8_K11_JAWS	IVW	4	0.0438779	0.168444	0.794486
finngen_R8_AB1_SEQULAE_TUBERCU	IVW	4	-0.0218298	0.0838589	0.79462
finngen_R8_CD2_BENIGN_COLON_NOS	IVW	4	0.0265119	0.102407	0.795721
finngen_R8_M13_DORSOPATHY	IVW	4	-0.00837277	0.0324088	0.796138
finngen_R8_K11_CHRONPANC	IVW	4	-0.025129	0.0973454	0.796297
finngen_R8_N14_GENITOUROTH	IVW	4	-0.0134611	0.0528145	0.798819
finngen_R8_I9_RHEUFEV	IVW	4	-0.0474805	0.18647	0.79901
finngen_R8_I9_OTHANEUR	IVW	4	0.022854	0.0902223	0.800031
finngen_R8_M13_SJOGREN	IVW	4	-0.021018	0.0834344	0.80111
finngen_R8_L12_PSORI_VULG	IVW	4	-0.0153712	0.0612956	0.801991
finngen_R8_ALCOPANCCHRON	IVW	4	-0.0506151	0.206321	0.806207
finngen_R8_I9_ATHSCLE	IVW	4	0.0112282	0.0457816	0.806258
finngen_R8_I9_VARICVE	IVW	4	-0.00640367	0.026185	0.806801
finngen_R8_F5_ALLANXIOUS	IVW	4	0.00672407	0.0275305	0.807044
finngen_R8_E4_PCOS	IVW	4	0.023195	0.0949742	0.807057
finngen_R8_N14_ENDOMETRIOSIS_OVARY	IVW	4	-0.015959	0.0654544	0.807372
finngen_R8_L12_OTHERCONTACT	IVW	4	-0.0312241	0.128233	0.807622
finngen_R8_M13_GANGLION	IVW	4	-0.00616013	0.0254123	0.808465
finngen_R8_N14_ACUTERENFAIL	IVW	4	-0.02016	0.0832018	0.808546
finngen_R8_I9_CORATHER	IVW	2	-0.00843229	0.0348176	0.808637
finngen_R8_N14_RENALTUBULOOTH	IVW	4	-0.0483952	0.200017	0.808814
finngen_R8_K11_CHOLANGI	IVW	4	0.033136	0.136968	0.808838
finngen_R8_M13_PATELLAOTH	IVW	4	0.0175208	0.0725847	0.809258
finngen_R8_O15_PUERP_COMPL_NAS	IVW	4	-0.0639155	0.268452	0.811812
finngen_R8_O15_DELIV_CAESAR	IVW	4	0.0177739	0.0746829	0.811887
finngen_R8_I9_STR_EMBOLIC_WITH_FLIMMER	IVW	4	0.0441452	0.185596	0.811992
finngen_R8_I9_MI_STRICT	IVW	4	0.00878773	0.0373846	0.81416
finngen_R8_F5_EMOCHILD	IVW	4	-0.024047	0.102413	0.814361
finngen_R8_GOUT_IDIO	IVW	4	-0.0183436	0.0783483	0.814885
finngen_R8_H7_AMBLYANOPSIA	IVW	4	-0.028142	0.120531	0.815386
finngen_R8_I9_ARTEMBTHRNAS	IVW	4	-0.0476235	0.204479	0.815838
finngen_R8_I9_DISVEINLYMPH	IVW	4	-0.00404341	0.0173682	0.815912
finngen_R8_Q17_SEPTA_DEFEC	IVW	4	0.0280155	0.120461	0.816097
finngen_R8_Q17_OTHER_CONGEN_MALFO_FACE_NECK	IVW	4	0.048948	0.210825	0.816403
finngen_R8_D3_SARCOIDOSIS	IVW	4	-0.0156883	0.0687193	0.819417
finngen_R8_E4_ADDISON	IVW	4	0.0332593	0.146187	0.820025
finngen_R8_N14_FEMALEINFERT	IVW	4	0.0189037	0.0833285	0.820534
finngen_R8_AUTOIMMUNE_HYPERTHYROIDISM	IVW	4	-0.0300708	0.133145	0.821317
finngen_R8_N14_OTHNONINFVAG	IVW	4	0.0441303	0.19637	0.822189
finngen_R8_N14_ENDOMETRIOSIS_UTERUS	IVW	4	-0.0253412	0.112771	0.822202
finngen_R8_C3_RESPIRATORY_INTRATHORACIC_EXALLC	IVW	4	-0.0104119	0.0464632	0.822687
finngen_R8_K11_FEMHER	IVW	4	-0.0502175	0.224559	0.823047
finngen_R8_N14_FEMALEGENNONINF	IVW	4	0.00850514	0.0383969	0.824698
finngen_R8_U22_COVID19_SUSPECTED	IVW	4	-0.0452059	0.204581	0.825117
finngen_R8_M13_LOOSEJOINT	IVW	4	0.0338701	0.153976	0.825895
finngen_R8_K11_PARALIL	IVW	4	0.0335226	0.154288	0.827996
finngen_R8_PAIN	IVW	4	-0.00547723	0.0252616	0.828348
finngen_R8_I9_VHD	IVW	4	0.00438964	0.0202823	0.828655
finngen_R8_M13_TEMPARTERIT	IVW	4	0.0417665	0.194022	0.829559
finngen_R8_N14_ORHCEPINDIDYMITIS	IVW	4	0.0251054	0.117392	0.830657
finngen_R8_KRA_PSY_SLEEP_NONORG_EXMORE	IVW	4	0.0121346	0.0575416	0.832978
finngen_R8_AB1_DERMATOPHYTOSIS	IVW	4	-0.0112722	0.0538747	0.834269
finngen_R8_CD2_BENIGN_OTHER_NOS	IVW	3	0.0436878	0.209043	0.834456
finngen_R8_E4_PARATHYRO	IVW	4	-0.0150433	0.0725681	0.835776
finngen_R8_N14_INFCERVIX	IVW	3	-0.0295509	0.142702	0.835947
finngen_R8_O15_BIRTH_BREAT_INFECT	IVW	4	-0.0410379	0.200749	0.838022
finngen_R8_N14_TUBULOINTNEPHRNAS	IVW	4	-0.0181263	0.0888658	0.838374
finngen_R8_J10_PLEURPLAGUE	IVW	4	0.0156232	0.0772214	0.839669
finngen_R8_CD2_MULTIPLE_MYELOMA_PLASMA_CELL_EXALLC	IVW	4	0.0354242	0.175236	0.839798
finngen_R8_CD2_BENIGN_EAR_NASAL_SINUS	IVW	4	0.0230712	0.114155	0.839835
finngen_R8_Q17_CYSTIC_KIDNEY_DISEA	IVW	4	0.0397056	0.197179	0.84041
finngen_R8_NECROVASC_FG	IVW	4	-0.0212064	0.105928	0.841327
finngen_R8_E4_DM1KETO	IVW	4	-0.0197451	0.100109	0.843643
finngen_R8_M13_ARTHROPATHIES	IVW	4	0.00148255	0.00752533	0.843822
finngen_R8_CHOLELITH_BROAD	IVW	4	0.00436202	0.0222166	0.844343
finngen_R8_CD2_BENIGN_MELANOCYTIC_TRUNK	IVW	4	0.0126085	0.0643416	0.84464
finngen_R8_SPONDYLOARTHRITIS	IVW	4	0.0170084	0.0871097	0.845195
finngen_R8_OSTEOPOROSIS_FRACTURE_FG	IVW	4	0.0370688	0.191459	0.84648
finngen_R8_RHEUMA_SEROPOS_STRICT	IVW	4	-0.00831785	0.0430235	0.846698
finngen_R8_L12_OTHACUSKINSUNNAS	IVW	4	-0.0493452	0.256117	0.84722
finngen_R8_L12_FOLICULAROTH	IVW	4	-0.0202748	0.105609	0.847758
finngen_R8_AB1_VIRAL_OTHER_INTEST_INFECTIONS	IVW	4	-0.00961107	0.0510503	0.850668
finngen_R8_I9_CHD	IVW	4	-0.00599998	0.0321295	0.851862
finngen_R8_I9_ANGIO	IVW	4	0.0130477	0.0699759	0.852085
finngen_R8_O15_POOR_FETGRO	IVW	4	0.011023	0.0593257	0.852598
finngen_R8_M13_PYOGARTH	IVW	4	-0.0162881	0.087946	0.853068
finngen_R8_E4_LACTONAS	IVW	4	0.0298053	0.161113	0.853232
finngen_R8_M13_SCIATICA	IVW	4	0.00900797	0.0487785	0.853487
finngen_R8_I9_REVASC	IVW	4	-0.00909909	0.0498675	0.855218
finngen_R8_MYELOPROF_NONCML	IVW	4	-0.0449057	0.246416	0.855398
finngen_R8_K11_PULP_PERIAPICAL	IVW	4	0.00876431	0.048291	0.855983
finngen_R8_Q17_CONGEN_MALFO_AORTIC_MITRAL_VALVES	IVW	4	-0.0325921	0.180174	0.856452
finngen_R8_I9_RHEUVALV	IVW	4	-0.0298603	0.168811	0.859598
finngen_R8_E4_HYPOPARA	IVW	4	0.0363425	0.207628	0.861051
finngen_R8_M13_CERVICOBRACHSDR	IVW	4	-0.0031737	0.0182248	0.861754
finngen_R8_G6_RADLES	IVW	4	0.0239131	0.137424	0.861858
finngen_R8_H7_LIDLACRIMALORBIT	IVW	4	0.00506822	0.0292101	0.862252
finngen_R8_M13_SPONDYLINFLAMNAS	IVW	4	0.0403584	0.235467	0.863911
finngen_R8_L12_LUPUS	IVW	4	0.0268056	0.156565	0.864059
finngen_R8_J10_CHRONRHINITIS	IVW	4	0.00369572	0.0216145	0.864237
finngen_R8_F5_SOMATOFORM	IVW	4	-0.0155585	0.0910046	0.864252
finngen_R8_F5_PTSD	IVW	4	0.0212237	0.125255	0.865447
finngen_R8_N14_VULVOVAGINFINOTH	IVW	3	-0.0449628	0.265551	0.865546
finngen_R8_O15_POSTPART_HEAMORRH_LB	IVW	4	-0.0043209	0.0256252	0.866096
finngen_R8_M13_RADICULOPATHY	IVW	4	0.0180989	0.107765	0.866625
finngen_R8_CD2_BENIGN_UTERUS_OTH	IVW	4	0.0283682	0.169847	0.867353
finngen_R8_ST19_FRACT_SHOUL_UPPER_ARM	IVW	4	-0.00768367	0.0460998	0.867626
finngen_R8_D3_ANAEMIA	IVW	4	-0.00262315	0.0159231	0.86915
finngen_R8_ABDOM_HERNIA	IVW	4	-0.0109572	0.0670051	0.870102
finngen_R8_K11_APPENDOTH	IVW	4	0.0153786	0.0970145	0.874048
finngen_R8_F5_SLEEP_NOS	IVW	4	0.0346134	0.219068	0.874454
finngen_R8_H7_CORNEALDEFORM	IVW	4	-0.0162919	0.104176	0.875727
finngen_R8_M13_HYPERMOBILITY	IVW	4	0.0149597	0.0958035	0.875915
finngen_R8_L12_VASCULITISNAS	IVW	4	-0.0174092	0.113248	0.877825
finngen_R8_I9_AVBLOCK	IVW	4	-0.00571767	0.0372873	0.878129
finngen_R8_F5_SCHIZOTYP	IVW	4	-0.03497	0.230782	0.879559
finngen_R8_HERING_BILATERAL	IVW	4	0.028337	0.187213	0.87969
finngen_R8_COPD_OPPORTUNIST_INFECTIONS	IVW	4	0.0364523	0.240902	0.879726
finngen_R8_E4_CONGEIOD	IVW	4	-0.0247532	0.163846	0.879916
finngen_R8_H8_CERUMEN	IVW	4	0.0186533	0.123657	0.880097
finngen_R8_K11_ORAL	IVW	4	0.00217625	0.014463	0.880394
finngen_R8_E4_GOITREMULTINOD	IVW	4	0.0111109	0.0755159	0.883027
finngen_R8_N14_KIDUROTH	IVW	4	0.0189907	0.129391	0.883314
finngen_R8_C3_SQUOMOUS_CELL_CARCINOMA_SKIN_EXALLC	IVW	4	-0.0180491	0.123125	0.883454
finngen_R8_N14_OTHINFVAGVULV	IVW	4	-0.0348887	0.239162	0.884017
finngen_R8_H7_MYOPIA	IVW	4	-0.0156671	0.107509	0.884136
finngen_R8_H7_CONJUNCTIVITISATOPIC	IVW	4	0.0297377	0.204338	0.884291
finngen_R8_O15_LABOUR_PELVIC_ABNORM	IVW	4	-0.0113805	0.0783915	0.884572
finngen_R8_CD2_BENIGN_MELANOCYTIC_LOWERLIMB	IVW	4	-0.0182064	0.125596	0.884743
finngen_R8_L12_INTERNALSUBSTANCEDERM	IVW	4	-0.0104753	0.0726317	0.885323
finngen_R8_Q17_CONGEN_MALFO_EYE_EAR_FACE_NECK	IVW	4	-0.0246489	0.171106	0.885456
finngen_R8_H8_OTALGIA	IVW	4	0.019209	0.133905	0.885933
finngen_R8_CD2_NONFOLLICULAR_LYMPHOMA_EXALLC	IVW	4	-0.00752073	0.0525535	0.886206
finngen_R8_M13_ACHILLESTEND	IVW	4	-0.0156569	0.109634	0.88644
finngen_R8_M13_OSTEOMYELITIS	IVW	4	0.019402	0.136937	0.887328
finngen_R8_I9_HEARTFAIL_AND_ANTIHYPERT	IVW	4	0.00753281	0.0534649	0.887955
finngen_R8_J10_SEPTDEV	IVW	4	-0.00927461	0.0671185	0.890096
finngen_R8_F5_VASCDEM	IVW	4	-0.0195134	0.142031	0.890724
finngen_R8_E4_PCOS_BROAD	IVW	4	-0.0195724	0.146273	0.893555
finngen_R8_C3_FEMALE_GENITAL_EXALLC	IVW	3	-0.00953425	0.0718818	0.89448
finngen_R8_WET_AMD	IVW	3	0.0165577	0.125469	0.89501
finngen_R8_H8_EXTOTITIS	IVW	4	-0.00932187	0.0707055	0.89511
finngen_R8_F5_SCHIZOAFF	IVW	4	-0.0144058	0.109443	0.895278
finngen_R8_ULCERPROCT	IVW	4	-0.00656738	0.0506272	0.896788
finngen_R8_CHRONOTH	IVW	4	-0.0149573	0.116245	0.897618
finngen_R8_J10_PLEUROTH	IVW	4	0.0177635	0.138398	0.897872
finngen_R8_ABDOM_HERNIA_POSTOP	IVW	4	0.011445	0.0899642	0.898769
finngen_R8_I9_VEINSOTH	IVW	4	0.00418053	0.0329908	0.899164
finngen_R8_E4_METABOLIA	IVW	4	-0.00268699	0.0212845	0.89954
finngen_R8_ERECTILE_DYSFUNCTION	IVW	2	0.018861	0.151292	0.900788
finngen_R8_F5_INSOMNIA	IVW	4	-0.00447903	0.0360635	0.901158
finngen_R8_NAFLD	IVW	4	-0.0186083	0.151763	0.902412
finngen_R8_F5_MENTALUNSPE	IVW	4	-0.0156733	0.129101	0.903371
finngen_R8_L12_OTHACUSKINSUN	IVW	4	0.0293509	0.243059	0.903884
finngen_R8_M13_MUSCULOSKELEOTH	IVW	4	0.0132669	0.115558	0.908598
finngen_R8_N14_MESNRUIRREG	IVW	4	-0.00302874	0.0264247	0.908748
finngen_R8_M13_ARTHROSIS_OTH	IVW	4	-0.00204521	0.0178484	0.908772
finngen_R8_O15_LABOUR_FETAL_STRESS	IVW	4	0.00465301	0.0406177	0.908797
finngen_R8_H7_VISDISTNAS	IVW	4	-0.00887788	0.0781501	0.909555
finngen_R8_O15_POSTPART_HEAMORRH	IVW	4	-0.00165037	0.0146133	0.910081
finngen_R8_K11_CARIES_DENTIN	IVW	4	0.0082273	0.0741107	0.911605
finngen_R8_L12_URTICA_DERTMATOG	IVW	4	-0.0167501	0.15212	0.912321
finngen_R8_H7_IRIDOCHRONIC	IVW	4	-0.0227374	0.208311	0.913083
finngen_R8_KRA_PSY_DEMENTIA_EXMORE	IVW	4	0.00231544	0.0212209	0.913114
finngen_R8_H7_KERATOCONUS	IVW	4	-0.022849	0.212358	0.914316
finngen_R8_CD2_BENIGN_DESCENDING_COLON	IVW	4	0.0248266	0.233685	0.915392
finngen_R8_F5_SCHIZPER	IVW	4	0.0219882	0.20781	0.915734
finngen_R8_RHEUMA_SEROPOS_WIDE	IVW	4	-0.00540047	0.0511757	0.915957
finngen_R8_ALLERG_RHINITIS	IVW	4	-0.0044878	0.043065	0.917003
finngen_R8_L12_LICHENSCLERATROPH	IVW	4	0.015613	0.149892	0.917041
finngen_R8_AD_LO_EXMORE	IVW	4	0.0052483	0.0523211	0.920099
finngen_R8_K11_REFLUX	IVW	4	-0.00300102	0.030312	0.921135
finngen_R8_CD2_BENIGN_EAR_RESP	IVW	4	0.0104522	0.107473	0.922524
finngen_R8_CD2_BENIGN_ANUS_ANAL_CANAL	IVW	4	0.00876721	0.0906171	0.922925
finngen_R8_AB1_SEXUAL_TRANSMISSION_NOS	IVW	3	0.0127174	0.134847	0.924863
finngen_R8_M13_CONNECTNAS	IVW	4	0.0152496	0.162966	0.925446
finngen_R8_JOINTPAIN	IVW	4	-0.00415392	0.0447241	0.926
finngen_R8_N14_FIANOV	IVW	4	-0.0171228	0.184621	0.926106
finngen_R8_ARTHRO_SPEC	IVW	4	-0.0208828	0.226459	0.926528
finngen_R8_I9_VTE	IVW	4	0.00323766	0.0355317	0.927397
finngen_R8_L12_ERYTHEMANODOSUM	IVW	4	0.0217854	0.240756	0.9279
finngen_R8_REAC_ARTHRO_NOS	IVW	4	-0.0123635	0.137061	0.928125
finngen_R8_N14_URETHRAOTH	IVW	4	0.00355516	0.039632	0.928522
finngen_R8_CD2_BENIGN_LIPO_NOS	IVW	4	0.00577302	0.0652124	0.929458
finngen_R8_N14_OVARYCYST	IVW	4	0.00449774	0.0516305	0.930581
finngen_R8_K11_GASTRODUOULC	IVW	4	0.00442133	0.0511575	0.931128
finngen_R8_ST19_FRACT_FOOT_ANKLE	IVW	4	-0.00428535	0.0530923	0.935668
finngen_R8_CD2_BENIGN_CONNECTIVE_SOFT	IVW	4	-0.00966004	0.119935	0.935804
finngen_R8_ALLERG_ASTHMA	IVW	4	0.00448514	0.0560449	0.936215
finngen_R8_I9_VASCDEM	IVW	4	-0.0114619	0.145365	0.937152
finngen_R8_BRONCHITIS	IVW	4	0.00227396	0.0288726	0.937225
finngen_R8_SMOKING_DEPEND	IVW	4	-0.0129219	0.167249	0.938415
finngen_R8_H7_HYPERMETRO	IVW	4	-0.00665397	0.0863292	0.938562
finngen_R8_H7_GLAUCOMA_POAG	IVW	4	0.00628267	0.0821889	0.939068
finngen_R8_E4_GRAVES_OPHT_STRICT	IVW	4	-0.0143631	0.189596	0.939613
finngen_R8_M13_FIBROMYALGIA	IVW	4	0.0070395	0.094453	0.940589
finngen_R8_K11_ACUTGASTR	IVW	4	-0.00477964	0.0641687	0.940624
finngen_R8_ST19_FRACT_WRIST_HAND_LEVEL	IVW	4	-0.00154413	0.0207683	0.940732
finngen_R8_C3_COLON_ADENO_EXALLC	IVW	4	-0.0097657	0.132911	0.941428
finngen_R8_E4_THYTOXGOITDIF	IVW	4	0.0081924	0.111913	0.941644
finngen_R8_K11_EMBIMPACT_TEETH_INCLAVO	IVW	4	-0.00235027	0.0325222	0.94239
finngen_R8_C3_COLON_EXALLC	IVW	4	-0.00722005	0.100885	0.942947
finngen_R8_E4_ENDOGLAND	IVW	4	0.00254263	0.0356127	0.943082
finngen_R8_CD2_BENIGN_BREAST	IVW	4	-0.00588221	0.0830263	0.943519
finngen_R8_KRA_PSY_ANYMENTAL	IVW	4	-0.0014757	0.0210843	0.944201
finngen_R8_F5_PSYCHOTH	IVW	2	0.00901927	0.130759	0.945008
finngen_R8_RHEUMA_SEROPOS_OTH	IVW	4	0.00389804	0.0568753	0.945359
finngen_R8_VIT_DEF	IVW	4	-0.0125098	0.188648	0.947129
finngen_R8_E4_LIPOPROT	IVW	4	-0.00175419	0.0264733	0.947169
finngen_R8_G6_SCIALE	IVW	4	0.0120091	0.186535	0.948668
finngen_R8_K11_OTHDISSTOMDUOD	IVW	4	0.0119618	0.186254	0.948792
finngen_R8_E4_HYPERKALAEMIA	IVW	4	0.0113054	0.185634	0.951438
finngen_R8_OSTPOPATFRCTURE_POSTEMENO	IVW	4	0.0133877	0.22504	0.952562
finngen_R8_M13_KNEEDERANGEMENTS	IVW	4	-0.00175482	0.0302615	0.953758
finngen_R8_E4_HYPERLIPMIX	IVW	4	-0.0138031	0.245402	0.955145
finngen_R8_M13_SPONDYLOPATHYNAS	IVW	4	-0.00820613	0.148267	0.955862
finngen_R8_M13_ARTHROSIS_POLY	IVW	3	0.00557185	0.101169	0.956079
finngen_R8_RHEUMA_ARHTROPAT_REACTIVE	IVW	4	0.00711497	0.129761	0.956273
finngen_R8_M13_REACTARTH	IVW	4	-0.00526419	0.0982702	0.957279
finngen_R8_N14_MALEGEN	IVW	4	-0.000851322	0.0164979	0.958846
finngen_R8_H7_PERIPHRETINADEGEN	IVW	4	0.00835373	0.16362	0.959281
finngen_R8_N14_OLIGOMEN	IVW	4	0.0124762	0.249639	0.960141
finngen_R8_C3_SCLC_EXALLC	IVW	4	0.0135847	0.289465	0.962569
finngen_R8_J10_ASBESTPNEUMOC	IVW	4	-0.00474596	0.101847	0.962833
finngen_R8_BACT_INTEST_INFECTION_NOS	IVW	4	0.00724198	0.157802	0.963396
finngen_R8_CD2_BENIGN_BONE_CARTILAGE	IVW	4	0.00168514	0.0368042	0.96348
finngen_R8_I9_TIA	IVW	4	0.00101032	0.022188	0.963681
finngen_R8_D3_ANAEMIA_B12_DEF	IVW	4	-0.0037742	0.0877695	0.965701
finngen_R8_H7_RETINOPATHYDIAB_NAS	IVW	4	-0.00480664	0.113102	0.966101
finngen_R8_AB1_VIRAL_SKIN_MUCOUS_MEMBRANE	IVW	4	0.00189893	0.0462988	0.967284
finngen_R8_N14_ENDOMET_INFERT	IVW	4	0.00344015	0.0854282	0.967878
finngen_R8_L12_LICHENSIMPLEX	IVW	4	0.00457295	0.114489	0.968139
finngen_R8_M13_CALCIFICTEND	IVW	4	0.0044636	0.112058	0.968226
finngen_R8_E4_THYTOXGOITMULT	IVW	4	-0.00495019	0.125399	0.968511
finngen_R8_L12_HIDRADENITISSUP	IVW	4	-0.0062108	0.158232	0.96869
finngen_R8_G6_EPLEPSY	IVW	4	-0.0024134	0.0615602	0.968728
finngen_R8_J10_INFLUPNEU	IVW	4	-0.000506559	0.0131403	0.969249
finngen_R8_Q17_CONGEN_MALFO_URINARY_SYSTEM	IVW	4	0.00567589	0.147289	0.969261
finngen_R8_G6_CARPTU	IVW	4	0.00162905	0.0424699	0.969402
finngen_R8_O15_CONCEPT_ABNORM	IVW	4	-0.00112646	0.0299317	0.969979
finngen_R8_M13_BURSOPATHY	IVW	4	0.0026114	0.0748566	0.972171
finngen_R8_K11_OTHGASTR	IVW	4	-0.00336844	0.0981523	0.972623
finngen_R8_K11_OTHPERITON	IVW	4	0.00638692	0.194524	0.973807
finngen_R8_E4_OVARDYS	IVW	4	-0.00525409	0.160111	0.973822
finngen_R8_K11_VENTHER	IVW	4	-0.00231456	0.0858565	0.978493
finngen_R8_K11_CHOLELITH	IVW	4	0.000550476	0.0210533	0.97914
finngen_R8_E4_HYPERPRO	IVW	4	-0.00437043	0.175867	0.980174
finngen_R8_O15_POSTPART_DEPR	IVW	4	0.000832785	0.0337289	0.980302
finngen_R8_K11_APHTA_RECUR_INCLAVO	IVW	4	-0.00169206	0.0685496	0.980307
finngen_R8_M13_SPINENTHES	IVW	4	-0.00415834	0.168892	0.980357
finngen_R8_H7_BINOCUMOVOTH	IVW	4	-0.0064212	0.264714	0.980648
finngen_R8_H8_EXTERNAL	IVW	4	-0.00138816	0.0585704	0.981091
finngen_R8_ALCOHOL_RELATED	IVW	4	0.00062684	0.0268593	0.981381
finngen_R8_J10_ACUTEUPPERINFEC	IVW	4	0.000648449	0.0288187	0.982048
finngen_R8_DENTAL_TMD_FIBRO	IVW	4	0.00158521	0.0725916	0.982578
finngen_R8_Z21_TOBAC_USE	IVW	4	0.00517653	0.24384	0.983063
finngen_R8_I9_HYPTENSHD	IVW	4	0.00149201	0.0724308	0.983565
finngen_R8_M13_ENTESOPATHYLOW	IVW	4	-0.00112247	0.0573279	0.984379
finngen_R8_AB1_TUBERCU_OTH_ORG	IVW	4	-0.00265464	0.135674	0.984389
finngen_R8_F5_PANIC	IVW	4	-0.0011599	0.0597211	0.984504
finngen_R8_I9_CVD_HARD	IVW	4	-0.000373963	0.0205373	0.985472
finngen_R8_I9_STR_EMBOLIC	IVW	4	-0.00102124	0.0565482	0.985591
finngen_R8_L12_SEBORRKERAT	IVW	4	0.00168617	0.097281	0.986171
finngen_R8_CD2_BENIGN_MELANOCYTIC_FACE	IVW	4	0.0024852	0.146756	0.986489
finngen_R8_M13_MUSCLESTRAIN	IVW	4	-0.00310603	0.204704	0.987894
finngen_R8_N14_MENORRHAGIA	IVW	4	0.000546524	0.0386834	0.988728
finngen_R8_D3_COAGOTHER	IVW	4	0.00210676	0.160349	0.989517
finngen_R8_N14_MENOPAUSOT	IVW	4	-0.00151817	0.135566	0.991065
finngen_R8_H8_TINNITUS	IVW	4	-0.000393127	0.0411805	0.992383
finngen_R8_D3_THROMBOCYTOPENIANAS	IVW	4	-0.00113629	0.138888	0.993472
finngen_R8_E4_DM1PERIPH	IVW	4	0.00103332	0.184636	0.995535
finngen_R8_H7_HETEROPHORIA	IVW	4	0.000716182	0.152164	0.996245
finngen_R8_RHEUMA_SERONEG	IVW	4	-0.000279071	0.0606906	0.996331
finngen_R8_O15_OTHER_MATERN_DIS_ELSEWHERE	IVW	4	7.10496e-05	0.0446015	0.998729

## Sheet: IGSF21
Bonferroni correction pval < 3.20E-06 (0.05/1421/11)
IGSF21
Diseases	method	nsnp	b	se	pval
finngen_R8_M13_LOWBACKPAIN	IVW	4	0.0888224	0.00223062	<3.14E-75
finngen_R8_CHILDHOOD_ALLERGY	IVW	4	-0.128429	0.00699783	3.14161e-75
finngen_R8_Q17_CONGEN_MALFO_EYE_EAR_FACE_NECK	IVW	4	0.470483	0.036826	2.23755e-37
finngen_R8_K11_CHRONHEP	IVW	4	0.415055	0.0338872	1.71915e-34
finngen_R8_F5_SCHZPHR	IVW	4	0.41652	0.038614	3.97541e-27
finngen_R8_G6_POLYOTHUNS	IVW	4	0.187609	0.0184279	2.41777e-24
finngen_R8_CD2_MYELOID_LEUKAEMIA_EXALLC	IVW	4	-0.784679	0.082909	2.9543e-21
finngen_R8_C3_COLON_ADENO_EXALLC	IVW	4	-0.325315	0.0388113	5.20536e-17
finngen_R8_F5_ANOREX	IVW	4	0.579837	0.0793002	2.63341e-13
finngen_R8_F5_PSYCHOTH	IVW	4	0.406212	0.0602112	1.5149e-11
finngen_R8_T2D_WIDE	IVW	4	0.11049	0.0169694	7.45987e-11
finngen_R8_J10_PLEUROTH	IVW	4	-0.245408	0.0380713	1.14833e-10
finngen_R8_E4_PARATHYRO	IVW	4	-0.179299	0.0293973	1.06625e-09
finngen_R8_C3_PANCREAS_EXALLC	IVW	4	0.45232	0.0755298	2.11613e-09
finngen_R8_Q17_OTHER_CONGEN_MALFO_FACE_NECK	IVW	4	0.415372	0.0732544	1.42579e-08
finngen_R8_K11_EMBED_TEETH_INCLAVO	IVW	4	-0.33587	0.0603654	2.63732e-08
finngen_R8_Q17_CONGEN_DEFORMITI_FEET	IVW	4	0.444783	0.0800069	2.70856e-08
finngen_R8_K11_EMBIMPACT_TEETH_INCLAVO	IVW	4	-0.0958768	0.0176247	5.33022e-08
finngen_R8_I9_STR_EMBOLIC_WITH_FLIMMER	IVW	4	0.641545	0.119332	7.60946e-08
finngen_R8_ARTHRO_SPEC	IVW	4	-0.406706	0.0766594	1.12448e-07
finngen_R8_M13_RHEUMATISM	IVW	4	0.204231	0.0389852	1.61736e-07
finngen_R8_KRA_PSY_CHILDEMOT_EXMORE	IVW	4	0.671328	0.129467	2.15644e-07
finngen_R8_F5_PSYTRANS	IVW	4	0.444566	0.0873486	3.58885e-07
finngen_R8_L12_FOLICULAROTH	IVW	4	-0.415125	0.0821331	4.3198e-07
finngen_R8_K11_ERUPTION_INCLAVO	IVW	4	-0.240603	0.0481359	5.78059e-07
finngen_R8_CD2_BENIGN_SALIVARY	IVW	4	-0.454257	0.0910014	5.98336e-07
finngen_R8_L12_FOLLICULARNAS	IVW	4	-0.262601	0.0534837	9.11084e-07
finngen_R8_E4_GLUCOPANCREAS	IVW	4	-0.241024	0.0491684	9.48642e-07
finngen_R8_CD2_BENIGN_PAROTID	IVW	4	-0.554894	0.113548	1.02452e-06
finngen_R8_L12_OTHACUSKINSUNNAS	IVW	4	-0.372797	0.0790026	2.37247e-06
finngen_R8_K11_APPENDACUT	IVW	4	-0.0724745	0.0153665	2.40072e-06
finngen_R8_C3_MELANOMA_EXALLC	IVW	4	-0.0661408	0.0141351	2.88032e-06
finngen_R8_U22_COVID19_SUSPECTED	IVW	4	0.159268	0.034254	3.32584e-06
finngen_R8_K11_DULC	IVW	4	0.203662	0.0439944	3.66967e-06
finngen_R8_C3_BRAIN_EXALLC	IVW	4	0.415496	0.0931334	8.14626e-06
finngen_R8_K11_ABSCANAL	IVW	4	-0.107919	0.0244689	1.0315e-05
finngen_R8_AUTOIMMUNE_HYPERTHYROIDISM	IVW	4	0.429018	0.0972741	1.03179e-05
finngen_R8_J10_UPPERDIS	IVW	4	0.0138559	0.0031688	1.22762e-05
finngen_R8_L12_ACTINKERA	IVW	4	0.117817	0.0272956	1.58639e-05
finngen_R8_Q17_CYSTIC_KIDNEY_DISEA	IVW	4	-0.504788	0.118207	1.95148e-05
finngen_R8_DM_RETINOPATHY_EXMORE	IVW	4	0.0807547	0.0189145	1.95943e-05
finngen_R8_H8_HL_CON_NAS	IVW	4	-0.160867	0.0381729	2.50686e-05
finngen_R8_KRA_PSY_SCHIZODEL_EXMORE	IVW	4	0.184538	0.0439448	2.67734e-05
finngen_R8_G6_OTHNEU	IVW	4	0.189537	0.0458256	3.53328e-05
finngen_R8_F5_SCHOLA	IVW	4	0.367353	0.0889103	3.60057e-05
finngen_R8_E4_LIPOPROTNAS	IVW	4	0.279278	0.0681863	4.2069e-05
finngen_R8_KRA_PSY_EATING_EXMORE	IVW	4	0.547729	0.13554	5.32047e-05
finngen_R8_POLLENALLERG	IVW	4	0.136356	0.0337927	5.45843e-05
finngen_R8_Q17_CONGEN_MALFO_URINARY_SYSTEM	IVW	4	-0.328688	0.0816834	5.72354e-05
finngen_R8_K11_DISORD_TEETH	IVW	4	0.125997	0.0315812	6.618e-05
finngen_R8_CHOLELITH_BROAD	IVW	4	0.0481041	0.012091	6.93545e-05
finngen_R8_E4_HYPOKALAEMIA	IVW	4	-0.174065	0.0440363	7.72538e-05
finngen_R8_AB1_VIRAL_NOS	IVW	4	0.180006	0.0457295	8.27362e-05
finngen_R8_N14_BREASTDISOTH	IVW	4	0.219399	0.0558922	8.65888e-05
finngen_R8_C3_COLON_EXALLC	IVW	4	-0.265471	0.0688621	0.000115679
finngen_R8_F5_AGORAPHOBIA	IVW	4	0.264795	0.0689079	0.000121667
finngen_R8_I9_VARICVEOES	IVW	4	0.244653	0.0639508	0.000130433
finngen_R8_GOUT_STRICT	IVW	4	-0.148085	0.0389152	0.000141627
finngen_R8_CAMPYLOENTERITIS	IVW	4	0.244681	0.0643737	0.000144144
finngen_R8_I9_HYPTENSESS	IVW	4	0.0249768	0.00660673	0.000156504
finngen_R8_H7_CONJUNCTIVITISACUNONATOPIC	IVW	4	-0.151967	0.0407029	0.000188785
finngen_R8_L12_PRURIGONOD	IVW	4	0.668006	0.179803	0.000203034
finngen_R8_C_STROKE	IVW	4	0.125302	0.0340581	0.000234084
finngen_R8_H7_CHORIORETINFLAM	IVW	4	-0.658957	0.180122	0.000253791
finngen_R8_KRA_PSY_HYPERKIN_EXMORE	IVW	4	0.301709	0.082657	0.000262107
finngen_R8_F5_BEHAVE	IVW	4	0.213881	0.0588084	0.000275926
finngen_R8_C3_CERVIX_UTERI_EXALLC	IVW	4	0.250043	0.0695719	0.000325617
finngen_R8_C3_FEMALE_GENITAL_EXALLC	IVW	4	0.117861	0.0329416	0.000346406
finngen_R8_WET_AMD	IVW	4	0.174902	0.0496281	0.000424668
finngen_R8_RHEUMA_SERONEG	IVW	4	0.223742	0.0637166	0.000445548
finngen_R8_J10_BRONCHIECTASIS	IVW	4	0.208375	0.0594076	0.000452247
finngen_R8_CD2_BENIGN_DESCENDING_COLON	IVW	4	-0.28583	0.0830473	0.00057791
finngen_R8_O15_MEMBR_PREMAT_RUPT	IVW	4	0.181917	0.0530627	0.00060729
finngen_R8_I9_K_CARDIAC	IVW	4	-0.0764931	0.0224178	0.000644509
finngen_R8_I9_PAROXTAC	IVW	4	-0.0979381	0.0289385	0.000713467
finngen_R8_H8_EXTDISINOTH	IVW	4	0.193653	0.0574056	0.000742395
finngen_R8_C3_SCLC_EXALLC	IVW	4	-0.769992	0.229371	0.000787997
finngen_R8_K11_HAEMORR	IVW	4	0.0838633	0.0251367	0.000849028
finngen_R8_CD2_BENIGN_DUODENUM	IVW	4	-0.643119	0.194163	0.000925431
finngen_R8_F5_SCHIZOTYP	IVW	3	1.11243	0.336363	0.000942227
finngen_R8_CD2_PRIMARY_LYMPHOID_HEMATOPOIETIC_EXALLC	IVW	4	-0.0925571	0.0281097	0.000992251
finngen_R8_F5_EMOCHILD	IVW	4	0.442371	0.135132	0.00106177
finngen_R8_RX_STATIN	IVW	4	0.0866473	0.0267175	0.00118239
finngen_R8_I9_VARICVESOTH	IVW	4	-0.22323	0.0694282	0.00130328
finngen_R8_I9_CHD	IVW	4	-0.0435531	0.013721	0.00150259
finngen_R8_M13_SOFTOVERUSE	IVW	4	0.119825	0.0381807	0.00169892
finngen_R8_K11_EROSION_INCLAVO	IVW	4	0.200937	0.0642865	0.00177413
finngen_R8_I9_TIA	IVW	4	0.234749	0.0754709	0.001868
finngen_R8_ST19_TOXIC_EFFECT_ALCOHOL	IVW	4	0.685688	0.223183	0.00212409
finngen_R8_OFFICIAL_TILASTOKESKUS_DEATH	IVW	4	0.430223	0.140776	0.0022425
finngen_R8_CD2_FOLLICULAR_LYMPHOMA_EXALLC	IVW	4	-0.253719	0.0830492	0.00225029
finngen_R8_M13_BIOMECHLESIO	IVW	4	0.60591	0.198635	0.0022856
finngen_R8_GE_MODE	IVW	4	-0.29312	0.097001	0.00251258
finngen_R8_L12_OTHACUSKINSUN	IVW	4	-0.688586	0.22822	0.0025512
finngen_R8_H7_VISDISTNAS	IVW	4	0.219976	0.0734301	0.00273793
finngen_R8_AB1_SEQULAE_TUBERCU	IVW	4	0.698244	0.235306	0.00300343
finngen_R8_CD2_BENIGN_LIPOMATOUS	IVW	4	0.132843	0.0448931	0.00308541
finngen_R8_J10_CHRONSINUSITIS	IVW	4	-0.0650446	0.0221434	0.0033095
finngen_R8_ABDOM_HERNIA	IVW	4	0.221256	0.0756333	0.00344035
finngen_R8_M13_PLANTARFASC	IVW	4	0.16745	0.0574736	0.0035738
finngen_R8_K11_CHOLELITH	IVW	4	0.0314601	0.0108299	0.00367346
finngen_R8_F5_SCHIZOAFF	IVW	4	0.499007	0.173057	0.00393313
finngen_R8_THYROIDITIS	IVW	4	-0.415477	0.144275	0.00397983
finngen_R8_K11_VENTHER	IVW	4	0.308793	0.10743	0.00404823
finngen_R8_L12_URTICA_NAS	IVW	4	-0.0988702	0.0345251	0.00418704
finngen_R8_G6_CPETAL	IVW	4	-0.378478	0.132814	0.00437618
finngen_R8_L12_URTICA_ALLERG	IVW	4	0.195876	0.0687825	0.00440286
finngen_R8_N14_FEMGENPAIN	IVW	4	0.126173	0.0443409	0.0044339
finngen_R8_CIRRHOSIS_BROAD	IVW	4	0.219551	0.0773319	0.00452445
finngen_R8_AB1_SEQULEAE_OF_INFECTIONS_AND_PARASITES	IVW	4	0.221957	0.0783202	0.00459738
finngen_R8_Q17_CONGEN_MALFO_AORTIC_MITRAL_VALVES	IVW	4	0.497548	0.176322	0.00477532
finngen_R8_L12_FOLLICULARCYST	IVW	4	-0.147107	0.052198	0.00482869
finngen_R8_N14_MALEINFERT	IVW	4	-0.406048	0.144144	0.00484814
finngen_R8_H7_CATARACTSENILE	IVW	4	-0.117092	0.041624	0.00490685
finngen_R8_Z21_PROBL_RELATED_MEDICAL_FACILITI_OTH_HEALTH_CARE	IVW	4	-0.481534	0.172522	0.0052522
finngen_R8_F5_PANIC	IVW	4	0.236002	0.0851768	0.00559298
finngen_R8_TONGUEABNORMALITY	IVW	4	-0.113575	0.0409955	0.00559847
finngen_R8_APPENDICITIS_BROAD	IVW	4	-0.0747467	0.0271114	0.00583308
finngen_R8_AB1_VARICELLA	IVW	4	0.580906	0.211738	0.00607865
finngen_R8_ABDOM_HERNIA_POSTOP	IVW	4	0.267441	0.0978821	0.00628989
finngen_R8_K11_ORAL_LEUCOPLAC_RELAT	IVW	4	-0.322887	0.118659	0.00650585
finngen_R8_M13_JUVOSTEOCHONRHIP	IVW	4	-0.560469	0.206736	0.00670733
finngen_R8_E4_DM1PERIPH	IVW	4	-0.0870569	0.0321905	0.00684226
finngen_R8_D3_ANAEMIA	IVW	4	0.142469	0.0529402	0.00712111
finngen_R8_H7_GLAUCSUSP	IVW	4	-0.0925427	0.034405	0.00714946
finngen_R8_F5_BULIMIA	IVW	4	0.46535	0.173008	0.00715018
finngen_R8_K11_PULPITIS_3	IVW	4	-0.389945	0.145408	0.00732427
finngen_R8_O15_FALSE_LAB	IVW	4	0.111981	0.0418196	0.00741275
finngen_R8_H7_REFRAACCOMMODIS	IVW	4	0.0461899	0.017358	0.00779057
finngen_R8_L12_DERMATITISNAS	IVW	4	-0.083699	0.0315208	0.00792237
finngen_R8_J10_EXTERLUNG	IVW	4	0.0613273	0.0232298	0.00828992
finngen_R8_E4_DM1KETO	IVW	4	-0.232891	0.0886844	0.00863794
finngen_R8_G6_SPINOTH	IVW	4	-0.287612	0.110011	0.00893848
finngen_R8_APPENDACUT_NOCOMPLIC	IVW	4	-0.0657602	0.0251842	0.00902327
finngen_R8_C3_MELANOMA_SKIN_EXALLC	IVW	4	-0.095253	0.036522	0.00910462
finngen_R8_N14_VULVAL_LSIL	IVW	4	0.329178	0.126829	0.00944691
finngen_R8_C3_COLORECTAL_EXALLC	IVW	4	-0.0962049	0.0370687	0.00945054
finngen_R8_G6_ATYFAC	IVW	4	0.479487	0.184917	0.00951468
finngen_R8_D3_ANAEMIA_IRONDEF_NAS	IVW	4	0.195989	0.0756276	0.00955593
finngen_R8_AD_EO_EXMORE	IVW	4	-0.722484	0.279134	0.00964499
finngen_R8_CD2_BENIGN_MENINGES_CEREBRAL	IVW	4	0.154139	0.0597797	0.00992435
finngen_R8_Q17_CONGEN_MALFO_DEFORMAT_MUSCULOS_SYSTEM	IVW	4	0.373007	0.144706	0.00994658
finngen_R8_L12_HIDRADENITISSUP	IVW	4	-0.56699	0.220073	0.00998447
finngen_R8_E4_DM2NEU	IVW	4	0.218979	0.0852213	0.0101835
finngen_R8_G6_CERCYST	IVW	4	0.450232	0.176598	0.0107886
finngen_R8_K11_CHRONPANC	IVW	4	0.112771	0.0442404	0.0108015
finngen_R8_TRAUMBRAIN_NONCONCUS	IVW	4	0.116904	0.0461027	0.0112214
finngen_R8_RX_CROHN_2NDLINE	IVW	4	0.126255	0.0501987	0.0118995
finngen_R8_K11_OTHDISDIG	IVW	4	0.0836379	0.0334735	0.0124674
finngen_R8_E4_HYPERPARA	IVW	4	-0.149095	0.0596971	0.0125064
finngen_R8_THROMBOCYTAEMIA	IVW	4	-0.334235	0.133986	0.0126114
finngen_R8_F5_NEUROTICOTH	IVW	3	0.738418	0.296895	0.0128776
finngen_R8_E4_HYPERLIPNAS	IVW	4	0.147541	0.0594195	0.0130266
finngen_R8_CD2_NONHODGKIN_NAS_EXALLC	IVW	4	0.290935	0.118133	0.0137864
finngen_R8_Z21_TOBAC_USE	IVW	4	0.301093	0.122349	0.0138577
finngen_R8_L12_PSORI_NAS	IVW	4	-0.447519	0.182104	0.0139908
finngen_R8_H7_RETINALDETACH	IVW	4	0.0428819	0.0174916	0.0142233
finngen_R8_PSORI_STRICT	IVW	4	-0.764355	0.314853	0.0151968
finngen_R8_H7_RETINANAS	IVW	4	0.761429	0.314949	0.0156222
finngen_R8_L12_LICHENSIMPLEX	IVW	4	-0.39914	0.165665	0.015982
finngen_R8_I9_HYPOTE	IVW	4	0.0398281	0.0165368	0.0160207
finngen_R8_K11_MN_RETRGN_AND_SURG	IVW	4	0.319157	0.13364	0.0169318
finngen_R8_ST19_FRACT_LUMBAR_SPINE_PELVIS	IVW	4	-0.0656274	0.0275003	0.0170131
finngen_R8_H8_VESTIBNEUR	IVW	4	-0.100764	0.0423108	0.0172418
finngen_R8_H7_PARASTRA6	IVW	4	-0.388186	0.163997	0.0179311
finngen_R8_L12_GRANULOMATOUSSKIN	IVW	4	0.709449	0.301099	0.0184631
finngen_R8_H7_VERTISTRAB	IVW	4	0.54851	0.232982	0.0185575
finngen_R8_AB1_OTHER_VIRAL	IVW	4	0.127811	0.0543689	0.0187329
finngen_R8_J10_COLD	IVW	4	0.0911755	0.0388854	0.0190413
finngen_R8_F5_INSOMNIA	IVW	4	0.361745	0.154833	0.0194727
finngen_R8_CD2_BENIGN_THYROID	IVW	4	-0.597814	0.256054	0.0195581
finngen_R8_F5_DISSOCIATIVE	IVW	4	0.207888	0.0892721	0.0198747
finngen_R8_C3_LIP_ORAL_PHARYNX_EXALLC	IVW	4	-0.288261	0.124267	0.0203574
finngen_R8_M13_FIBROMYALGIA	IVW	4	0.454291	0.196508	0.0207875
finngen_R8_O15_OBSTET_TRAUMA_OTHER	IVW	4	0.404411	0.174967	0.0208133
finngen_R8_O15_ANTEPART_HAEM_NAS	IVW	4	-0.260962	0.113187	0.0211337
finngen_R8_AB1_SEXUAL_TRANSMISSION_NOS	IVW	4	-0.120207	0.0521439	0.0211501
finngen_R8_DRY_AMD	IVW	4	0.192762	0.0840796	0.02187
finngen_R8_AB1_HERPES_SIMPLEX	IVW	4	0.114215	0.0500214	0.022411
finngen_R8_J10_CHRONTONSADEN	IVW	4	0.065401	0.0286477	0.0224341
finngen_R8_I9_PHLETHROMBDVTLOW	IVW	4	0.0571223	0.0250446	0.0225589
finngen_R8_CD2_BENIGN_MENINGES	IVW	4	0.179229	0.0786499	0.0226779
finngen_R8_F5_ADHD	IVW	4	0.20532	0.0901796	0.022799
finngen_R8_CD2_BENIGN_UTERUS_NOS	IVW	4	0.306758	0.135308	0.0233833
finngen_R8_L12_ATOPIC	IVW	4	-0.113714	0.0504426	0.0241761
finngen_R8_K11_FISTULA	IVW	4	0.114522	0.0509012	0.0244563
finngen_R8_H7_RETINOPATHYDIAB_BKG_SEVERE	IVW	4	0.296567	0.132051	0.0247138
finngen_R8_AB1_CANDIDIASIS	IVW	4	0.167617	0.0748647	0.0251606
finngen_R8_N14_FEMALE_GENITAL_LSIL	IVW	4	0.153247	0.0687806	0.0258772
finngen_R8_N14_INFLUTH	IVW	4	0.0944991	0.042519	0.0262486
finngen_R8_K11_MISS_TEETH_ACCID_EXTR_PAROD	IVW	4	0.180089	0.0813698	0.0268828
finngen_R8_ST19_FRACT_NECK	IVW	4	-0.130128	0.058796	0.0268829
finngen_R8_L12_PSORI_VULG	IVW	3	-0.269327	0.121952	0.0272114
finngen_R8_ANOSMIA	IVW	4	-0.298137	0.136037	0.0284092
finngen_R8_N14_CERVICAL_DYSPLASIA_ALL	IVW	4	0.141907	0.0647658	0.0284458
finngen_R8_MACULAR_HOLE	IVW	4	-0.121866	0.0557318	0.0287685
finngen_R8_O15_PLAC_PREMAT_SEPAR	IVW	4	0.858783	0.393514	0.0290844
finngen_R8_K11_APPENDECTOMY	IVW	4	-0.110078	0.0505918	0.0295701
finngen_R8_ST19_FRACT_FOREA	IVW	4	0.169047	0.0777371	0.0296597
finngen_R8_K11_OTHFUNC	IVW	4	-0.062744	0.0288861	0.0298469
finngen_R8_FG_CARDMYO	IVW	4	0.236692	0.109167	0.0301469
finngen_R8_RX_GLUCOSAMINE	IVW	4	-0.112918	0.0521999	0.0305264
finngen_R8_K11_ORAL_LEUCOPLACIA_INCLAVO	IVW	4	-0.337988	0.156834	0.0311562
finngen_R8_O15_DELIV_CAESAR	IVW	4	0.150649	0.0708546	0.0334886
finngen_R8_E4_THYROIDITSUBAC	IVW	4	-0.267253	0.125718	0.033518
finngen_R8_F5_PARAPER	IVW	4	0.434897	0.205286	0.0341331
finngen_R8_L12_URTICA_DERTMATOG	IVW	4	0.36568	0.172856	0.0343858
finngen_R8_H7_BINOCUMOVOTH	IVW	4	-0.274358	0.12971	0.0344156
finngen_R8_ANTIDEPRESSANTS	IVW	4	0.0553414	0.0261705	0.0344601
finngen_R8_AB1_OTHER_INFECTIONS	IVW	4	0.189056	0.0896981	0.0350581
finngen_R8_G6_MEDLEOTH	IVW	4	0.360369	0.171099	0.0351869
finngen_R8_I9_CARDMYOOTH	IVW	4	0.312664	0.148701	0.0354971
finngen_R8_G6_BRACHPLE	IVW	4	-0.185621	0.0885819	0.0361287
finngen_R8_I9_NONISCHCARDMYOP	IVW	4	0.106567	0.0510886	0.0369858
finngen_R8_I9_STR	IVW	4	0.0935438	0.0448483	0.0369983
finngen_R8_CD2_BENIGN_MELANOCYTIC_SCALPNECK	IVW	4	0.475978	0.228316	0.0370933
finngen_R8_M13_TRIGGERFINGER	IVW	3	-0.288446	0.138564	0.0373711
finngen_R8_L12_PSORIASIS	IVW	3	-0.20046	0.0966395	0.0380513
finngen_R8_G6_MERALGIA	IVW	4	0.210328	0.101648	0.0385296
finngen_R8_H7_KERATITISOTH	IVW	4	-0.23387	0.11306	0.0385884
finngen_R8_H7_RETINOCHISISCYST	IVW	4	-0.557019	0.269905	0.0390409
finngen_R8_N14_OTHNONINFCERVIX	IVW	4	0.390099	0.189346	0.0393755
finngen_R8_H7_PTERYGIUM	IVW	4	0.592537	0.287905	0.0395811
finngen_R8_L12_INFECT_DERM	IVW	4	-0.134487	0.065372	0.0396618
finngen_R8_ALLERG_ASTHMA	IVW	4	-0.0918016	0.0447953	0.0404271
finngen_R8_AB1_OTHER_SPIROCHAETAL	IVW	4	0.316409	0.154743	0.0408812
finngen_R8_K11_UMBHER	IVW	4	0.176561	0.0865205	0.0412821
finngen_R8_D3_SCNDPOLYCYTHAEMIA	IVW	4	0.173887	0.0852375	0.0413479
finngen_R8_L12_DISORDSKINAPPENDIX	IVW	4	-0.045178	0.0222614	0.0424137
finngen_R8_O15_POLYHYDR	IVW	4	0.320481	0.159024	0.0438732
finngen_R8_MYELOPROF_NONCML	IVW	4	-0.305491	0.152079	0.0445614
finngen_R8_I9_INTRACRA	IVW	4	0.253852	0.126471	0.0447287
finngen_R8_Q17_LVOTO_NARROW	IVW	4	0.349923	0.174352	0.0447504
finngen_R8_AB1_VIRAL_CNS	IVW	4	-0.32007	0.159621	0.0449427
finngen_R8_K11_APHTA_RECUR_INCLAVO	IVW	4	0.130814	0.065289	0.045111
finngen_R8_E4_FLUIDELECTRO	IVW	4	-0.0700972	0.0349975	0.0451861
finngen_R8_CD2_BENIGN_LIPO_NOS	IVW	4	0.275637	0.138044	0.0458544
finngen_R8_K11_COELIAC	IVW	4	-0.214054	0.107882	0.0472392
finngen_R8_D3_ANAEMIA_IRONDEF	IVW	4	0.157466	0.0796038	0.0479154
finngen_R8_E4_VIT_B_DEF	IVW	4	0.354711	0.179743	0.0484464
finngen_R8_O15_DELIV_PERIN_LACER	IVW	4	0.12591	0.0638948	0.0487711
finngen_R8_I9_CARDMYO	IVW	4	0.149754	0.0760636	0.0489754
finngen_R8_K11_PARALIL	IVW	4	0.63402	0.322727	0.0494635
finngen_R8_M13_HYPERMOBILITY	IVW	4	-0.435404	0.222176	0.0500277
finngen_R8_H7_GLAUCCLOSEPRIM	IVW	4	-0.445615	0.228556	0.0512123
finngen_R8_F5_OTHERSUB	IVW	4	0.229855	0.118148	0.0517173
finngen_R8_K11_DIVERTIC	IVW	4	0.0747772	0.0385535	0.0524322
finngen_R8_K11_MAJOR_ANOMALI_JAW_SIZE_INCLAVO	IVW	4	-0.374549	0.193943	0.0534539
finngen_R8_DM_NEUROPATHY	IVW	4	0.124414	0.0644288	0.0534797
finngen_R8_C3_BREAST_HERPLUS_EXALLC	IVW	4	-0.11862	0.0616211	0.0542311
finngen_R8_F5_VASCDEM	IVW	4	-0.289912	0.151132	0.055077
finngen_R8_I9_UAP	IVW	4	-0.0951465	0.0496612	0.055376
finngen_R8_AB1_VIRAL_MENINGITIS	IVW	4	-0.55707	0.29142	0.0559317
finngen_R8_CD2_BENIGN_EAR_NASAL_SINUS	IVW	4	0.136064	0.0712005	0.0560046
finngen_R8_I9_NONRHEVALV	IVW	4	0.0896429	0.0470546	0.0567693
finngen_R8_N14_ENDOMETRIOSIS_ASRM_STAGE3_4	IVW	4	-0.148446	0.0784299	0.0583948
finngen_R8_N14_UTER_POLYP	IVW	4	0.291709	0.154571	0.0591307
finngen_R8_I9_HYPTENS	IVW	4	0.0220181	0.0116697	0.0591905
finngen_R8_I9_OTHARR	IVW	4	0.0701331	0.0372404	0.0596658
finngen_R8_MACULAR_PUCKER	IVW	4	-0.190601	0.101754	0.0610465
finngen_R8_F5_SOMATOFORM	IVW	4	0.0475452	0.0255211	0.0624654
finngen_R8_D3_ANAEMIA_IRONDEF_BLOODLOSS	IVW	4	0.225706	0.122137	0.0646074
finngen_R8_G6_MONOLOWOTHUNS	IVW	4	-0.590188	0.319738	0.0649143
finngen_R8_E4_FH	IVW	4	0.21293	0.11544	0.065109
finngen_R8_CD2_BENIGN_EAR_RESP	IVW	4	0.235224	0.128824	0.0678593
finngen_R8_G6_MS	IVW	4	0.296687	0.163608	0.0697702
finngen_R8_N14_VULVAL_DYSPLASIA_ALL	IVW	4	0.195756	0.107969	0.0698195
finngen_R8_N14_CERVICAL_LSIL	IVW	4	0.137952	0.076345	0.0707695
finngen_R8_I9_ARTOTH	IVW	4	-0.242736	0.134636	0.0714028
finngen_R8_E4_HYTHY_AI_STRICT	IVW	4	-0.0483493	0.0268234	0.0714664
finngen_R8_K11_CHOLECYSTECTOMY	IVW	4	0.0391688	0.0217677	0.071955
finngen_R8_E4_DM1COMA	IVW	4	-0.0783461	0.0435771	0.0721973
finngen_R8_H7_VITRBODYGLOBE	IVW	3	-0.138729	0.0772673	0.0725835
finngen_R8_O15_POSTPART_HAEMORRH_PLACENTA	IVW	4	0.115823	0.0645184	0.0726221
finngen_R8_E4_LIPOPROT	IVW	4	0.0720681	0.0401571	0.0727089
finngen_R8_C3_BRONCHUS_LUNG_EXALLC	IVW	4	-0.159593	0.088986	0.0728996
finngen_R8_M13_RHEUMA	IVW	4	0.106112	0.0593047	0.0735717
finngen_R8_AB1_VIRAL_WARTS	IVW	4	0.17399	0.0976397	0.0747558
finngen_R8_ASTHMA_OBESITY	IVW	4	0.136035	0.0764051	0.0750035
finngen_R8_O15_CONCEPT_ABNORM	IVW	4	0.0392381	0.0220905	0.0756927
finngen_R8_K11_VOLVU	IVW	2	-0.673013	0.380175	0.0766817
finngen_R8_E4_HYPOPARA	IVW	4	-0.417835	0.236697	0.077518
finngen_R8_I9_STR_EMBOLIC	IVW	4	0.375349	0.212789	0.0777408
finngen_R8_CD2_BENIGN_CONNECTIVE_SOFT	IVW	4	0.22676	0.128846	0.0784187
finngen_R8_C3_MENINGIOMA_EXALLC	IVW	4	0.201688	0.115126	0.0797936
finngen_R8_ST19_TOXIC_EFFECT_ETHAN	IVW	4	0.163312	0.0932706	0.079955
finngen_R8_M13_HAMMERTOE	IVW	4	0.125572	0.0717569	0.080125
finngen_R8_H7_OCUMUSCLE	IVW	4	0.0493717	0.0282694	0.0807294
finngen_R8_N14_FEMALE_GENITAL_DYSPLASIA_ALL	IVW	4	0.135983	0.0782381	0.0822
finngen_R8_H7_CHALAZION	IVW	4	-0.107119	0.0621125	0.0845999
finngen_R8_I9_MI_STRICT	IVW	4	-0.0211386	0.0122931	0.0855135
finngen_R8_N14_MENSIRREG	IVW	4	0.0888033	0.0516996	0.0858551
finngen_R8_H7_STRABOTH	IVW	4	0.0642667	0.0375299	0.0868204
finngen_R8_G6_EPIPAROX	IVW	4	0.0179195	0.0104653	0.0868456
finngen_R8_H7_PARASTRAB	IVW	4	0.120554	0.071093	0.0899392
finngen_R8_K11_DISTAL_BITE_INCLAVO	IVW	4	0.695896	0.410492	0.0900238
finngen_R8_H8_EXT_NAS	IVW	4	-0.165153	0.0974251	0.0900422
finngen_R8_K11_ORAL_LICHEN_PLANUS_WIDE	IVW	4	0.113068	0.0668314	0.0906765
finngen_R8_M13_ENTESOPATHYNAS	IVW	4	-0.354646	0.209985	0.0912362
finngen_R8_N14_ENDOMETRIOSIS	IVW	4	-0.069429	0.0412249	0.0921519
finngen_R8_RHEU_ARTHRITIS_OTH	IVW	4	-0.0945868	0.0564221	0.0936574
finngen_R8_M13_CALCIFICTEND	IVW	4	-0.369427	0.221362	0.0951409
finngen_R8_M13_ARTHROSIS_KNEE_PRIM_KNEESURG	IVW	4	-0.0445609	0.0267564	0.0958268
finngen_R8_M13_POLYMYALGIA	IVW	4	0.247014	0.148343	0.0958805
finngen_R8_L12_LICHENSCLERATROPH	IVW	4	0.253396	0.152287	0.0961257
finngen_R8_E4_PCOS_CONCORTIUM	IVW	4	0.0967528	0.0582017	0.0964386
finngen_R8_H8_VESTIFUNCNAS	IVW	4	0.29496	0.177622	0.096793
finngen_R8_H7_GLAUCOMA	IVW	4	-0.135567	0.0816654	0.0969092
finngen_R8_CHRONLARGE	IVW	4	0.327868	0.197638	0.0971303
finngen_R8_C3_RESPIRATORY_INTRATHORACIC_EXALLC	IVW	4	-0.181981	0.109944	0.0978812
finngen_R8_G6_NEUINFL	IVW	4	-0.151081	0.091286	0.0979187
finngen_R8_N14_GLOMEINOTH	IVW	4	0.286466	0.173104	0.0979493
finngen_R8_O15_MATERN_CARE	IVW	4	0.0356114	0.0216097	0.0993655
finngen_R8_MACULA_NAS	IVW	4	-0.225173	0.136768	0.099683
finngen_R8_M13_SPONDYLINFLAMNAS	IVW	4	-0.219057	0.133387	0.100534
finngen_R8_AB1_SEQULAE_INF_NOS	IVW	4	0.192953	0.117543	0.100683
finngen_R8_H7_MYOPIA	IVW	4	-0.220578	0.134513	0.101041
finngen_R8_KRA_PSY_MOOD_EXMORE	IVW	4	0.0404561	0.0246762	0.101113
finngen_R8_K11_DEEP_BITE_INCLAVO	IVW	4	0.280417	0.172295	0.103623
finngen_R8_K11_OTHINFLIV	IVW	4	0.277041	0.170941	0.105086
finngen_R8_L12_PAPULOSQUAMOUS	IVW	3	-0.131559	0.0813716	0.105929
finngen_R8_DM_POLYNEURO	IVW	4	0.287081	0.178117	0.107015
finngen_R8_CHRONSMALL	IVW	4	0.187122	0.116365	0.107823
finngen_R8_J10_SINUSITIS	IVW	4	-0.0660703	0.0411572	0.108424
finngen_R8_K11_CHRONGASTR	IVW	4	-0.0949421	0.0591671	0.108572
finngen_R8_M13_HALLUXRIGIDUS	IVW	4	0.0981276	0.0612865	0.109348
finngen_R8_F5_DELIRIUM	IVW	4	-0.22969	0.143693	0.109936
finngen_R8_I9_ARTEMBTHR	IVW	4	0.22092	0.13829	0.110151
finngen_R8_FG_CEREBVASC	IVW	4	0.0774088	0.0487462	0.112287
finngen_R8_M13_DORSALGIA	IVW	4	0.046577	0.0293531	0.112562
finngen_R8_I9_VHD	IVW	4	0.0415909	0.0263323	0.11423
finngen_R8_G6_HEMIPLE	IVW	4	-0.261824	0.165935	0.114594
finngen_R8_AB1_ANOGENITAL_HERPES_SIMPLEX	IVW	4	0.10298	0.0652689	0.114618
finngen_R8_N14_GLOMERULAR	IVW	4	0.23935	0.15193	0.115164
finngen_R8_I9_VASCDEM	IVW	4	-0.257417	0.1634	0.115169
finngen_R8_M13_OVERUSENAS	IVW	4	0.291185	0.184992	0.115479
finngen_R8_Q17_CRANIOSYNOSTOSIS	IVW	4	-0.231201	0.147607	0.117271
finngen_R8_L12_EPIDERMALTHICKOTH	IVW	4	-0.334068	0.214102	0.118684
finngen_R8_G6_MYOPOTHUNS	IVW	4	-0.0748207	0.0480811	0.119676
finngen_R8_H8_NOISEINNER	IVW	4	-0.351676	0.226299	0.120177
finngen_R8_DM_RET_VEIN_OCCLU	IVW	4	0.351184	0.226078	0.120333
finngen_R8_D3_OTHERWHITECELL	IVW	4	-0.250994	0.161694	0.120596
finngen_R8_ST19_FRACT_RIBS_STERNUM_THORACIC_SPINE	IVW	4	0.121679	0.0785598	0.121413
finngen_R8_F5_OPIOIDS	IVW	4	0.305118	0.197096	0.121607
finngen_R8_K11_CARIES_2	IVW	4	-0.0980529	0.0636606	0.123501
finngen_R8_CD2_BENIGN_LARYNX	IVW	4	0.352165	0.22886	0.123858
finngen_R8_K11_MALABSORB	IVW	4	-0.314334	0.204378	0.124047
finngen_R8_E4_HYPERALDO	IVW	4	0.426427	0.277293	0.124092
finngen_R8_C3_NSCLC_ADENO_EXALLC	IVW	3	-0.377179	0.245581	0.124572
finngen_R8_C3_OTHER_SKIN_EXALLC	IVW	4	0.073921	0.0482151	0.125239
finngen_R8_G6_STATUSEPI	IVW	4	-0.458359	0.299625	0.126073
finngen_R8_K11_ALCOLIV	IVW	4	0.181458	0.118977	0.127221
finngen_R8_O15_ICP_EXMORE	IVW	4	-0.205024	0.134454	0.127293
finngen_R8_ALCOHOLACUTE10	IVW	4	-0.139477	0.0917913	0.128636
finngen_R8_ULCERNAS	IVW	4	0.198736	0.130925	0.12903
finngen_R8_F5_KELAMENT	IVW	4	0.161496	0.106884	0.130804
finngen_R8_RX_PARACETAMOL_NSAID	IVW	4	0.0551738	0.0365336	0.130987
finngen_R8_H7_ANISOMETROPIA	IVW	4	-0.401415	0.266561	0.132093
finngen_R8_OSTPOPATFRCTURE_POSTEMENO	IVW	4	0.25595	0.170476	0.133257
finngen_R8_J10_LOWCHRON	IVW	4	0.0438209	0.0291945	0.133356
finngen_R8_H7_HYPERMETRO	IVW	4	0.206187	0.137445	0.133578
finngen_R8_I9_SECONDRIGHT	IVW	4	-0.255478	0.170424	0.133855
finngen_R8_N14_INFCERVIX	IVW	3	0.316139	0.211078	0.134202
finngen_R8_E4_DM1OPTH	IVW	4	0.152828	0.102151	0.134629
finngen_R8_AB1_MYCOSES	IVW	4	0.0722253	0.048364	0.13534
finngen_R8_H7_BLINDANDVISIMPAIRMENT	IVW	4	-0.269969	0.18115	0.136145
finngen_R8_BLEEDING	IVW	4	0.110296	0.0741623	0.136954
finngen_R8_H7_ALLERGICCONJUNCTIVITIS	IVW	4	0.0440652	0.0297558	0.138635
finngen_R8_E4_FH_IHD	IVW	4	0.0822252	0.0555405	0.138751
finngen_R8_MEMLOSS	IVW	3	0.405309	0.274247	0.139435
finngen_R8_H7_RETINAVASC	IVW	4	0.317452	0.215021	0.139842
finngen_R8_D3_ANAEMIA_B12_DEF	IVW	4	-0.24151	0.163585	0.139846
finngen_R8_H7_GLOBE	IVW	4	-0.55363	0.375602	0.140486
finngen_R8_J10_TONSILLITIS	IVW	4	0.0790571	0.0536751	0.140783
finngen_R8_M13_BICIPITALTEND	IVW	4	0.346346	0.235445	0.141284
finngen_R8_H7_RETIVASCOCCLUSION	IVW	4	0.314235	0.21385	0.141719
finngen_R8_E4_DMNAS	IVW	4	-0.121836	0.083382	0.143965
finngen_R8_K11_GASTRODUOULC	IVW	4	0.109123	0.0747036	0.144087
finngen_R8_HERING_UNILATERAL	IVW	4	-0.45955	0.314719	0.144237
finngen_R8_M13_ADHCAPSULITIS	IVW	4	0.113207	0.0776149	0.144681
finngen_R8_I9_HEARTFAIL_AND_ANTIHYPERT	IVW	4	0.0652411	0.0447877	0.145207
finngen_R8_O15_MATERN_CARE_DISPROP	IVW	4	0.246751	0.169634	0.145778
finngen_R8_Q17_CONGEN_MALFO_OVARIES_FALLOP_TUBES_BROAD_LIGAM	IVW	4	0.285157	0.196373	0.146469
finngen_R8_CD2_BENIGN_LEIOMYOMA_UTERI	IVW	4	-0.0288555	0.0199695	0.148464
finngen_R8_N14_POSTMENBLEED	IVW	4	-0.0567191	0.0393486	0.149457
finngen_R8_CD2_BENIGN_SALIVARY_NOS	IVW	4	-0.159537	0.11152	0.152553
finngen_R8_CD2_BENIGN_SMALL_INTESTINE	IVW	4	-0.325769	0.228005	0.153067
finngen_R8_M13_LOWBACKPAINORANDSCIATICA	IVW	4	0.0258184	0.0180881	0.153473
finngen_R8_O15_EXCESS_VOMIT_PREG	IVW	4	0.103218	0.072411	0.154027
finngen_R8_F5_MILDRET	IVW	4	0.380335	0.266851	0.154079
finngen_R8_H7_DIPLOPIA	IVW	3	-0.208769	0.146871	0.155189
finngen_R8_M13_POSTOPMUSCULOSKE	IVW	4	-0.236667	0.166508	0.155214
finngen_R8_M13_MONOARTHRITIS	IVW	4	0.296302	0.208727	0.155735
finngen_R8_C3_BREAST_EXALLC	IVW	4	-0.0789502	0.0556245	0.155799
finngen_R8_K11_OTHABDHER	IVW	4	0.157416	0.11157	0.158267
finngen_R8_H8_CHOLEASTOMA	IVW	4	0.248065	0.176308	0.159427
finngen_R8_K11_HEPFAIL	IVW	4	0.40016	0.285284	0.160714
finngen_R8_K11_PARODON_OPER_DENTAL_OPER	IVW	4	-0.0594356	0.0424787	0.161757
finngen_R8_H7_GLAUCNAS	IVW	4	-0.307288	0.220714	0.163848
finngen_R8_J10_SEPTDEV	IVW	4	-0.054948	0.0394744	0.163925
finngen_R8_I9_CAVS_OPERATED	IVW	4	0.095215	0.068427	0.164079
finngen_R8_H7_INTERHETEROTRO	IVW	4	0.250102	0.180056	0.164826
finngen_R8_M13_LOOSEJOINT	IVW	4	0.488427	0.352749	0.166166
finngen_R8_L12_ATROPHICSKIN	IVW	4	0.12884	0.0932464	0.167059
finngen_R8_K11_ANOMALI_DENTAL_ARCH_RELATIONS1_INCLAVO	IVW	4	0.174121	0.126115	0.167386
finngen_R8_O15_MATERN_CARE_PELVIC_ABNORM	IVW	4	0.0857221	0.0622813	0.168707
finngen_R8_U22_COVID19_CONFIRMED	IVW	4	-0.310519	0.22603	0.169504
finngen_R8_KELA_DIAB_INSUL_EXMORE	IVW	4	0.0460639	0.0337191	0.171905
finngen_R8_VD_U	IVW	4	-0.41616	0.304634	0.171909
finngen_R8_M13_OSTEONECROSIS	IVW	4	-0.244225	0.178798	0.171961
finngen_R8_K11_OTHDISOES	IVW	4	-0.0419789	0.0307544	0.172262
finngen_R8_N14_CYSTKID	IVW	4	0.296955	0.218052	0.173245
finngen_R8_O15_LABOUR_INTRAPART_HAEMORRH	IVW	4	0.273232	0.20132	0.174718
finngen_R8_M13_THORACISPINEPAIN	IVW	4	0.106045	0.0781747	0.174937
finngen_R8_K11_CONSTIPATION	IVW	4	0.054649	0.0405304	0.177547
finngen_R8_E4_DM2PERIPH	IVW	4	0.128158	0.0950878	0.177727
finngen_R8_C3_NSCLC_SQUAM_EXALLC	IVW	4	0.11629	0.0865393	0.17902
finngen_R8_K11_REFLUX	IVW	4	-0.0555508	0.0414175	0.179842
finngen_R8_K11_GALLBLAOTH	IVW	4	-0.182634	0.136673	0.181455
finngen_R8_H8_MASTCHRON	IVW	4	-0.398264	0.298106	0.181555
finngen_R8_H8_HL_SEN_NAS	IVW	4	-0.0601876	0.0450543	0.181585
finngen_R8_I9_ICH	IVW	4	0.303927	0.227593	0.181747
finngen_R8_G6_MONONPOTHUS	IVW	4	0.380938	0.285458	0.182046
finngen_R8_M13_CERVICALGIA	IVW	4	0.103243	0.0774846	0.182717
finngen_R8_J10_PLEURA	IVW	4	-0.0198917	0.0149301	0.182754
finngen_R8_D3_ACUTEPOSTBLEEDANAEMIA	IVW	4	0.428922	0.322312	0.183265
finngen_R8_E4_GOITREMULTINOD	IVW	4	0.063892	0.048028	0.183418
finngen_R8_H7_AMD	IVW	4	0.0836578	0.0629974	0.184193
finngen_R8_AB1_STREPTO_SEPSIS	IVW	4	0.175444	0.132194	0.18445
finngen_R8_G6_XTRAPYR	IVW	3	-0.122695	0.0925266	0.184823
finngen_R8_K11_PERITON	IVW	4	0.106916	0.0807392	0.18543
finngen_R8_E4_VOLUME	IVW	4	-0.172729	0.1307	0.186313
finngen_R8_M13_ENTESOPATHYOTH	IVW	3	-0.206057	0.15633	0.187472
finngen_R8_F5_ALLANXIOUS	IVW	4	0.0571824	0.0434107	0.187758
finngen_R8_D3_THROMBOCYTOPENIANAS	IVW	4	-0.180895	0.137492	0.18828
finngen_R8_K11_DEPOSITS	IVW	4	0.321497	0.244529	0.188591
finngen_R8_L12_LICHENPLANUS_INCLAVO	IVW	4	0.118406	0.0901832	0.1892
finngen_R8_CD2_BENIGN_RECTUM_ANAL	IVW	2	-0.211136	0.161389	0.190791
finngen_R8_M13_MYOSITIS	IVW	4	0.375973	0.287851	0.191505
finngen_R8_I9_OTHILLHEART	IVW	4	-0.468967	0.360324	0.193082
finngen_R8_K11_FIBROCHIRLIV	IVW	4	0.306847	0.235876	0.193298
finngen_R8_F5_PSYCHDEV	IVW	4	0.17907	0.138301	0.195396
finngen_R8_I9_AORTVALV_EARLY	IVW	4	0.199171	0.153923	0.195677
finngen_R8_M13_JUVERHEU	IVW	4	-0.418299	0.32482	0.19782
finngen_R8_AMN2	IVW	4	0.296757	0.230634	0.198197
finngen_R8_N14_CYSTITIS	IVW	4	-0.0720108	0.0560031	0.198501
finngen_R8_C3_URINARY_TRACT_EXALLC	IVW	4	0.116402	0.0905611	0.198674
finngen_R8_C3_MALE_GENITAL_EXALLC	IVW	4	0.0231592	0.0180377	0.199166
finngen_R8_CD2_BENIGN_RECTUM	IVW	4	-0.18951	0.147703	0.199475
finngen_R8_M13_OTHERJOINT	IVW	4	0.0416143	0.0324496	0.199692
finngen_R8_AB1_VIRAL_OTHER_INTEST_INFECTIONS	IVW	4	0.0992832	0.0774419	0.199831
finngen_R8_N14_ENDOMETRIOSIS_OVARY	IVW	4	-0.127104	0.0991687	0.19995
finngen_R8_GOUT_IDIO	IVW	4	-0.257728	0.201709	0.201347
finngen_R8_DEATH	IVW	4	-0.0192346	0.0150813	0.202171
finngen_R8_H8_CERUMEN	IVW	4	0.137806	0.108252	0.203013
finngen_R8_I9_SAH	IVW	4	0.1792	0.141253	0.204568
finngen_R8_O15_COMPLIC_ABORT_ECTOP_MOLAR	IVW	4	0.194967	0.154786	0.207818
finngen_R8_CD2_BENIGN_ASCENDING_COLON	IVW	4	0.0862389	0.0685651	0.208476
finngen_R8_F5_ALCOHOLAC	IVW	4	-0.0727215	0.0579561	0.209563
finngen_R8_M13_SPONDYLOPATHYNAS	IVW	3	-0.457527	0.364669	0.20961
finngen_R8_CHIRHEP_NAS	IVW	4	0.236756	0.188794	0.209828
finngen_R8_AB1_VIRAL_HEMOR_FEVER_NOS	IVW	4	-0.273364	0.218231	0.210338
finngen_R8_G6_POSTOPNEURO	IVW	4	-0.217615	0.174562	0.212532
finngen_R8_E4_ENDODIS	IVW	3	0.285699	0.22958	0.213336
finngen_R8_KRA_PSY_ANXIETY_EXMORE	IVW	4	0.0439634	0.0355136	0.215741
finngen_R8_K11_DENTOFACIAL_ANOMALIES	IVW	4	0.122454	0.0989199	0.21575
finngen_R8_M13_NEURALGIA	IVW	4	0.261861	0.211819	0.216366
finngen_R8_DM_HYPOGLYC	IVW	4	-0.0422431	0.034205	0.216832
finngen_R8_H7_CATARACTOTHER	IVW	4	-0.0823931	0.0668025	0.217432
finngen_R8_E4_ENDODISNAS	IVW	3	-0.536328	0.435565	0.218196
finngen_R8_T1D_STRICT1	IVW	4	-0.0981489	0.0799131	0.219374
finngen_R8_ASTHMA_PNEUMONIA	IVW	4	-0.106314	0.0870797	0.222129
finngen_R8_M13_MUSCLESTRAIN	IVW	4	0.394672	0.323372	0.22228
finngen_R8_D3_COAGOTHER	IVW	4	0.174511	0.143074	0.222569
finngen_R8_AB1_SALMONELLA_OTH	IVW	4	0.301592	0.247479	0.222974
finngen_R8_O15_MATERN_CARE_FETAL_ABNORM	IVW	4	0.206852	0.169786	0.223107
finngen_R8_ULCEROTH	IVW	4	0.258267	0.212921	0.225141
finngen_R8_CD2_BENIGN_CONJUNCTIVA	IVW	4	-0.155957	0.128741	0.225741
finngen_R8_O15_POSTPART_DEPR	IVW	4	0.0386508	0.0319832	0.226866
finngen_R8_H7_CORNEALNAS	IVW	4	0.180387	0.149765	0.22841
finngen_R8_T2D	IVW	4	0.054036	0.0449884	0.229708
finngen_R8_D3_SARCOIDOSIS	IVW	4	-0.161783	0.134759	0.229931
finngen_R8_CD2_BENIGN_BREAST	IVW	4	0.0848118	0.0707243	0.230454
finngen_R8_M13_PREPATELLARBURSITIS	IVW	4	0.383754	0.320212	0.230747
finngen_R8_E4_ENDOGLAND	IVW	4	-0.0293656	0.0245386	0.23142
finngen_R8_ALCO_PRESCRIPTION	IVW	4	0.208366	0.174701	0.232987
finngen_R8_L12_ERYTHEMANODOSUM	IVW	4	0.0289036	0.0242573	0.23344
finngen_R8_CD2_BENIGN_MOUTH_NOS	IVW	4	0.300865	0.253587	0.23545
finngen_R8_J10_PLEURPLAGUE	IVW	4	-0.244696	0.206334	0.235654
finngen_R8_O15_ABORT_UNS	IVW	4	0.185076	0.156248	0.236214
finngen_R8_O15_PUERP_INFECT_OTHER	IVW	4	0.214515	0.181254	0.236608
finngen_R8_D3_ANAEMIANAS	IVW	4	0.076541	0.0646786	0.236649
finngen_R8_AD_AM_EXMORE	IVW	4	0.134824	0.114114	0.237412
finngen_R8_M13_DORSOPATHY	IVW	4	0.0386964	0.0327927	0.237988
finngen_R8_H7_RETINALDETACHBREAK	IVW	4	-0.124652	0.106145	0.24025
finngen_R8_I9_VASCSYND	IVW	4	0.258041	0.220288	0.241447
finngen_R8_N14_BARTHOABSCESS	IVW	4	0.425219	0.363676	0.242314
finngen_R8_O15_AMNIOT_OTHER	IVW	4	0.145359	0.124395	0.242594
finngen_R8_E4_DM2NASCOMP	IVW	4	0.0441549	0.0378074	0.242851
finngen_R8_K11_TEETH_HARD	IVW	4	0.179534	0.153811	0.243114
finngen_R8_AB1_PEDICULOSIS_ACARIASIS_OTHERINFEST	IVW	4	-0.188967	0.16201	0.243457
finngen_R8_SPONDYLOPATHY_FG	IVW	4	-0.148511	0.127873	0.245482
finngen_R8_M13_TOEDEFORMOTH	IVW	4	0.309996	0.267312	0.24618
finngen_R8_K11_ACUTPANC	IVW	4	-0.100969	0.0871184	0.24646
finngen_R8_H7_VISFIELDDEF	IVW	4	0.14419	0.124543	0.246965
finngen_R8_G6_HYDROCEPH	IVW	4	0.214925	0.186079	0.248082
finngen_R8_N14_FITUB	IVW	4	0.0722756	0.0626691	0.248791
finngen_R8_I9_PERICAOTH	IVW	4	0.353007	0.306621	0.249617
finngen_R8_COPD_OPPORTUNIST_INFECTIONS	IVW	4	-0.347616	0.302172	0.249983
finngen_R8_H8_MIDDLEMASTOID	IVW	3	0.0688982	0.060013	0.250946
finngen_R8_ST19_FRACT_FEMUR	IVW	4	-0.115146	0.100378	0.25133
finngen_R8_D3_WHITEBLOODCELLNAS	IVW	4	-0.246043	0.215199	0.252903
finngen_R8_H7_ENTROPION	IVW	4	0.201883	0.176954	0.253922
finngen_R8_N14_CHRONEPHROPATH	IVW	4	0.307695	0.271587	0.257234
finngen_R8_O15_GESTAT_HYPERT	IVW	4	-0.068299	0.0605291	0.259165
finngen_R8_M13_DORSOPATHYOTH	IVW	4	0.0381543	0.0338359	0.259478
finngen_R8_C3_BASAL_CELL_CARCINOMA_EXALLC	IVW	4	0.0720394	0.063943	0.259903
finngen_R8_RX_N05C	IVW	4	0.0337141	0.0299979	0.261063
finngen_R8_M13_DORSOPATHYNAS	IVW	4	0.254442	0.227078	0.262498
finngen_R8_N14_OTHDISMALEGEN	IVW	4	0.322323	0.288446	0.263805
finngen_R8_M13_EARLY_LUMBAR_PROLAPSE	IVW	4	0.0505778	0.0453144	0.264357
finngen_R8_F5_MIXEDDEV	IVW	4	0.38055	0.341704	0.265415
finngen_R8_C3_CORPUS_UTERI_EXALLC	IVW	4	0.15256	0.137007	0.265486
finngen_R8_CD2_BENIGN_UTERUS_OTH	IVW	4	0.189694	0.170915	0.267053
finngen_R8_CD2_BENIGN_BRAIN_CNS	IVW	4	-0.216997	0.195676	0.267447
finngen_R8_L12_ALOPECAREATA	IVW	4	0.267407	0.241205	0.26759
finngen_R8_H7_CORNEALDEFORM	IVW	4	-0.22762	0.205433	0.267862
finngen_R8_AB1_RESP_TUBERCU_NONCONF	IVW	4	0.316421	0.286331	0.26912
finngen_R8_CD2_BENIGN_STOMACH	IVW	4	0.197906	0.179358	0.269847
finngen_R8_CD2_BENIGN_ADRENAL	IVW	4	0.1415	0.128311	0.27012
finngen_R8_CD2_BENIGN_PITUITARY_CRANIPHAR	IVW	4	-0.160181	0.145575	0.271188
finngen_R8_H8_TINNITUS	IVW	4	0.0755617	0.0686907	0.27132
finngen_R8_K11_UC_STRICT2	IVW	4	0.106775	0.0971787	0.271877
finngen_R8_I9_AVBLOCK	IVW	4	0.0434759	0.0396333	0.272662
finngen_R8_L12_VASCULITISNAS	IVW	4	0.230642	0.210334	0.272839
finngen_R8_O15_PREG_GU_INFECT	IVW	4	0.211787	0.193146	0.272853
finngen_R8_NIV	IVW	4	-0.174869	0.159671	0.273436
finngen_R8_N14_CHRONTUBULOINTNEPHRITIS	IVW	4	0.247121	0.225775	0.273718
finngen_R8_I9_HEARTFAIL_EXMORE	IVW	4	0.0668165	0.0610596	0.273831
finngen_R8_N14_OBSTRUREFLUROPATH	IVW	4	0.169807	0.15571	0.275479
finngen_R8_E4_PCOS	IVW	4	0.279679	0.256955	0.276402
finngen_R8_CD2_BENIGN_OVARY	IVW	4	-0.144809	0.133119	0.276678
finngen_R8_C3_MENINGES_EXALLC	IVW	4	0.108952	0.100228	0.277019
finngen_R8_J10_PNEUMONONBACT	IVW	3	-0.339985	0.312764	0.277022
finngen_R8_I9_VEINSOTH	IVW	4	0.0604336	0.0556802	0.277758
finngen_R8_G6_MONOOTHUNS	IVW	4	-0.370788	0.341778	0.277976
finngen_R8_M13_METATARSALGIA	IVW	4	-0.173725	0.160179	0.278115
finngen_R8_N14_FEMGENPROL	IVW	4	0.0587389	0.054208	0.278549
finngen_R8_I9_ATHSCLE	IVW	4	-0.0576157	0.0532147	0.278941
finngen_R8_I9_CARDARR	IVW	4	0.18238	0.168494	0.279068
finngen_R8_K11_INTESTOTH	IVW	4	0.0166551	0.0154105	0.279802
finngen_R8_K11_CD_STRICT2	IVW	4	0.219599	0.203353	0.28019
finngen_R8_G6_ALCODEGEN	IVW	4	-0.33406	0.3094	0.280275
finngen_R8_ST19_FRACT_SKULL_FACIAL_BONES	IVW	3	0.209663	0.194391	0.280782
finngen_R8_THYROTOXICOSIS	IVW	4	0.126625	0.117546	0.281373
finngen_R8_BACT_INTEST_INFECTION_NOS	IVW	4	-0.172972	0.160639	0.281583
finngen_R8_SLEEP	IVW	4	0.0327948	0.0304935	0.282166
finngen_R8_K11_CROWDI_TEETH_INCLAVO	IVW	4	-0.124891	0.116348	0.283083
finngen_R8_H8_OTHHEARINGLOSS	IVW	4	0.0485869	0.0453077	0.28355
finngen_R8_H7_VITROPACIT	IVW	4	0.224542	0.209776	0.284444
finngen_R8_C3_STOMACH_EXALLC	IVW	4	-0.233359	0.218413	0.285326
finngen_R8_N14_ORHCEPINDIDYMITIS	IVW	4	0.18538	0.173565	0.285488
finngen_R8_M13_SPONDYLOLISTHESIS	IVW	4	0.0851553	0.0797306	0.285504
finngen_R8_M13_DEQUERVAIN	IVW	4	-0.20417	0.191195	0.285582
finngen_R8_GOUT_NOS	IVW	4	0.083231	0.078071	0.286381
finngen_R8_N14_OTHNONINFOVA	IVW	4	0.386104	0.363859	0.288628
finngen_R8_M13_INFBURSA	IVW	4	-0.145111	0.137193	0.290187
finngen_R8_K11_ATTRITION	IVW	4	0.302345	0.285852	0.290193
finngen_R8_H7_CONJUNCTIVITISATOPIC	IVW	4	0.184278	0.17449	0.290926
finngen_R8_I9_CEREBDOTH	IVW	4	0.176933	0.167646	0.291245
finngen_R8_I9_ANGINA	IVW	4	-0.0492665	0.0467653	0.29212
finngen_R8_N14_NEPHROTICSYND	IVW	4	0.401326	0.381388	0.292673
finngen_R8_N14_CERVICAL_HSIL	IVW	4	0.16282	0.154732	0.292676
finngen_R8_D3_OTHERBLOOD	IVW	4	0.11247	0.106964	0.293039
finngen_R8_C3_SKIN_EXALLC	IVW	4	0.0427987	0.0407386	0.293457
finngen_R8_O15_LABOUR_MALPOS	IVW	4	0.0610829	0.0582542	0.294382
finngen_R8_I9_RHEUFEV	IVW	4	-0.191536	0.18359	0.296817
finngen_R8_N14_IMPOTENCE	IVW	4	-0.115528	0.110803	0.297115
finngen_R8_I9_OTHOTH	IVW	3	0.290099	0.278356	0.297325
finngen_R8_N14_VAGINITIS	IVW	4	-0.0950421	0.0912326	0.297525
finngen_R8_Q17_CONGEN_MALFO_GENITAL_ORGANS	IVW	4	0.108074	0.104673	0.301843
finngen_R8_D3_IMMUNEMECHANISMNAS	IVW	3	0.341809	0.331708	0.302798
finngen_R8_KRA_PSY_SLEEP_NONORG_EXMORE	IVW	4	0.156561	0.152006	0.303026
finngen_R8_O15_COMPLIC_PUERP	IVW	4	0.0556446	0.0540786	0.3035
finngen_R8_AB1_HEPATITIS_OTHER_VIRAL	IVW	4	0.210018	0.204438	0.304282
finngen_R8_Q17_LVOTO_BROAD	IVW	4	0.130158	0.127586	0.307654
finngen_R8_KRA_PSY_SPEELING_EXMORE	IVW	4	0.196956	0.193075	0.307682
finngen_R8_C3_BREAST_HER2NEG_EXALLC	IVW	4	-0.0620035	0.0607999	0.307825
finngen_R8_N14_CALCUKIDUR	IVW	4	0.104398	0.102427	0.308092
finngen_R8_G6_ENCEPHOTH	IVW	4	-0.295446	0.290104	0.308481
finngen_R8_E4_DM1REN	IVW	4	0.113759	0.11233	0.31119
finngen_R8_IPF	IVW	4	-0.221865	0.220276	0.313833
finngen_R8_M13_KNEEDERANGEMENTS	IVW	4	0.0385624	0.0383345	0.314442
finngen_R8_H8_SUP_ACUTE	IVW	4	-0.170108	0.170294	0.317841
finngen_R8_RHEUMA_SEROPOS	IVW	4	0.0832598	0.0836199	0.319399
finngen_R8_M13_PANNICULITIS	IVW	4	-0.144745	0.145445	0.319645
finngen_R8_CD2_HODGKIN_LYMPHOMA_EXALLC	IVW	4	-0.420382	0.422557	0.319808
finngen_R8_M13_CHONDROMALACIA	IVW	4	0.184313	0.186163	0.322142
finngen_R8_C3_BASAL_CELL_CARCINOMA_INCLAVO_EXALLC	IVW	4	0.0622532	0.0629046	0.322348
finngen_R8_N14_LUMPNASBREAST	IVW	4	-0.122756	0.12408	0.322501
finngen_R8_D3_IMMUNEMECHANISM	IVW	4	-0.141583	0.143377	0.323405
finngen_R8_E4_HYPERCHOL	IVW	4	0.0636518	0.0645539	0.32412
finngen_R8_RHINITIS_VASOMOTOR	IVW	4	0.134262	0.137606	0.329216
finngen_R8_M13_ALGONEURO	IVW	4	0.209679	0.214951	0.329325
finngen_R8_C3_LIVER_INTRAHEPATIC_BILE_DUCTS_EXALLC	IVW	4	0.417098	0.428407	0.330254
finngen_R8_H7_CONJUNCTIVITISCHRON	IVW	4	0.229791	0.237345	0.332958
finngen_R8_I9_CABG	IVW	4	0.0977692	0.101439	0.335134
finngen_R8_K11_IBS	IVW	4	-0.0501346	0.0522559	0.337354
finngen_R8_L12_PSORI_ARTHRO	IVW	4	-0.151957	0.158459	0.337576
finngen_R8_ST19_FRACT_SHOUL_UPPER_ARM	IVW	4	-0.0486075	0.050713	0.33782
finngen_R8_M13_OSTEOCHONDRO	IVW	4	-0.0378167	0.0395348	0.338799
finngen_R8_I9_DVTANDPULM	IVW	4	0.0401289	0.042018	0.339557
finngen_R8_H8_BPV	IVW	4	-0.0785328	0.0822612	0.339742
finngen_R8_I9_HYPTENSHD	IVW	4	0.0794258	0.0833197	0.340455
finngen_R8_N14_SALPHOOPH	IVW	4	0.0783814	0.0825058	0.342107
finngen_R8_M13_CERVICOBRACHSDR	IVW	4	-0.0420008	0.0443153	0.343245
finngen_R8_M13_MYALGIA	IVW	4	-0.0882668	0.0936469	0.345912
finngen_R8_SMOKING	IVW	4	0.150038	0.159445	0.346703
finngen_R8_E4_ENDOMETPOSTOP	IVW	4	0.0999281	0.106241	0.346921
finngen_R8_M13_INTERVERTEB	IVW	4	-0.0278001	0.0295579	0.346946
finngen_R8_N14_ENDOMETRIOSIS_DEEP	IVW	4	-0.0803587	0.0855639	0.347646
finngen_R8_TBC_RESP	IVW	4	0.223458	0.238134	0.348055
finngen_R8_ILD_INSUFFICIENCY	IVW	4	-0.165397	0.176364	0.348339
finngen_R8_CARDIAC_ARRHYTM	IVW	4	0.0306039	0.0328061	0.350886
finngen_R8_ST19_FRACT_FOOT_ANKLE	IVW	4	0.0562813	0.0604493	0.351828
finngen_R8_L12_ALLERGICCONTACT	IVW	4	0.108168	0.116429	0.352866
finngen_R8_I9_SAHANEUR	IVW	4	0.159857	0.172692	0.354614
finngen_R8_I9_OTHPER	IVW	4	-0.0916843	0.0990559	0.354664
finngen_R8_H7_RETINASEPAR	IVW	4	-0.15718	0.169974	0.355105
finngen_R8_KRA_PSY_BEHAV_EXMORE	IVW	4	-0.448646	0.485536	0.355474
finngen_R8_L12_ULCERLOWLIMB	IVW	4	-0.0511524	0.055431	0.356105
finngen_R8_E4_PCOS_BROAD	IVW	3	0.159535	0.173512	0.357864
[truncated: 782 more rows]

## Sheet: LGALS9
Bonferroni correction pval < 3.20E-06 (0.05/1421/11)
[truncated: 1,416 more rows]

[truncated: 5 more sheets: MRC1, PBLD, PKD1, PXDNL, SIGLEC8]
