# Supplementary material for: Uncovering drug targets for cluster headache through proteome-wide Mendelian randomization analysis
Source: Springer Nature journal article supplement (doi:10.1186/s10194-025-01999-0), 2025-03-20
Supplement: MOESM6 [file 10194_2025_1999_MOESM6_ESM.xlsx]

## Sheet: Sheet1
Table S4. 6 Acute and 9 preventive medications for cluster headache and the corresponding drug targets.
Acute cluster headache drug target					Preventive cluster headache drug target
Drug (Recommendations)a	Gene	Uniprot ID	Actions		Drug (Recommendations)a	Gene	Uniprot ID	Actions
Oxygen	MT-CO1	P00395	Agonist/Activator		Verapamil	CACNA1C	Q13936	Inhibitor
	NOX1	Q9Y5S8	Agonist/Activator			CACNA1B	Q00975	Inhibitor
sumatriptan	HTR1A	P08908	Agonist			CACNA1A	O00555	Inhibitor
	HTR1D	P28221	Agonist			KCNJ11	Q14654	Inhibitor
	HTR1B	P28222	Agonist			CACNA1G	O43497	Inhibitor
	HTR1F	P30939	Agonist			CACNA1H	O95180	Inhibitor
zolmitriptan	HTR1B	P28222	Agonist			KCNH2	Q12809	Inhibitor
	HTR1D	P28221	Agonist			SLC6A4	P31645	Unknown
	HTR1F	P30939	Agonist			ADRA1A	P35348	Antagonist
	HTR1E	P28566	Agonist			ADRA1B	P35368	Antagonist
	HTR7	P34969	Agonist			ADRA1D	P25100	Antagonist
	HTR1A	P08908	Agonist			ABCB1	P08183	Inhibitor/Blocker
	HTR2A	P28223	Agonist			CACNG1	Q06432	Inhibitor
	HTR2B	P41595	Agonist			CACNG2	Q9Y698	Inhibitor
Octreotide	-	-	-			CACNG3	O60359	Inhibitor
Lidocaine	SCN10A	Q9Y5Y9	Inhibitor			CACNG4	Q9UBN1	Inhibitor
	SCN9A	Q15858	Inhibitor			CACNG5	Q9UF02	Inhibitor
	SCN5A	Q14524	Inhibitor			CACNG6	Q9BXT2	Inhibitor
	EGFR	P00533	Antagonist			CACNG7	P62955	Inhibitor
	SCN4A	P35499	Unknown			CACNG8	Q8WXS5	Inhibitor
	ORM1	P02763	Unknown			CACNA2D1	P54289	Inhibitor
	ORM2	P19652	Unknown			CACNA2D2	Q9NY47	Inhibitor
Ergotamine	HTR1D	P28221	Agonist			CACNA2D3	Q8IZS8	Inhibitor
	HTR1B	P28222	Agonist			CACNA2D4	Q7Z3S7	Inhibitor
	HTR2A	P28223	Agonist			CACNA1C	Q13936	Inhibitor
	ADRA1A	P35348	Partial agonist			CACNA1D	Q01668	Inhibitor
	ADRA1B	P35368	Partial agonist			CACNA1F	O60840	Inhibitor
	ADRA1D	P25100	Partial agonist			CACNA1S	Q13698	Inhibitor
	DRD2	P14416	Agonist			CACNB1	Q02641	Inhibitor
	ADRA2A	P08913	Partial agonist			CACNB2	Q08289	Inhibitor
	DRD1	P21728	Agonist			CACNB3	P54284	Inhibitor
	DRD5	P21918	Agonist			CACNB4	O00305	Inhibitor
	HTR1A	P08908	Agonist			CACNA1B	Q00975	Inhibitor
	HTR1F	P30939	Agonist			CACNA1A	O00555	Inhibitor
	HTR2C	P28335	Agonist			CACNA1E	Q15878	Inhibitor
	HTR2B	P41595	Agonist			CACNA1G	O43497	Inhibitor
	ADRA2C	P18825	Unknown			CACNA1H	O95180	Inhibitor
aEuropean Academy of Neurology guidelines on the treatment of cluster headache						CACNA1I	Q9P0X4	Inhibitor
					Oral corticosteroids	-	-	-
					Galcanezumab	CALCA	P06881	Antibody
						CALCB	P10092	Antibody
					Lithium	GSK3B	P49841	Inhibitor
						IMPA1	P29218	Inhibitor
						IMPA2	O14732	Inhibitor
						GRIA3	P42263	Potentiator
					Topiramate	GABRA1	P14867	Agonist
						CA2	P00918	Inhibitor
						CA4	P22748	Inhibitor
						CA1	P00915	Inhibitor
						CA3	P07451	Inhibitor
						CACNA1E	Q15878	Antagonist
						SCN1A	P35498	Inhibitor
						SCN2A	Q99250	Inhibitor
						SCN3A	Q9NY46	Inhibitor
						SCN4A	P35499	Inhibitor
						SCN5A	Q14524	Inhibitor
						SCN7A	Q01118	Inhibitor
						SCN8A	Q9UQD0	Inhibitor
						SCN9A	Q15858	Inhibitor
						SCN10A	Q9Y5Y9	Inhibitor
						SCN11A	Q9UI33	Inhibitor
						SCN1B	Q07699	Inhibitor
						SCN2B	O60939	Inhibitor
						SCN3B	Q9NY72	Inhibitor
						SCN4B	Q8IWT1	Inhibitor
						GRIK1	P39086	Antagonist
						GRIK2	Q13002	Antagonist
						GRIK3	Q13003	Antagonist
						GRIK4	Q16099	Antagonist
						GRIK5	Q16478	Antagonist
						CACNA1C	Q13936	Antagonist
						CACNA1D	Q01668	Antagonist
						CACNA1F	O60840	Antagonist
						CACNA1S	Q13698	Antagonist
						CACNB1	Q02641	Antagonist
						CACNB2	Q08289	Antagonist
						CACNB3	P54284	Antagonist
						CACNB4	O00305	Antagonist
					Ergotamine	HTR1D	P28221	Agonist
						HTR1B	P28222	Agonist
						HTR2A	P28223	Agonist
						ADRA1A	P35348	Partial agonist
						ADRA1B	P35368	Partial agonist
						ADRA1D	P25100	Partial agonist
						DRD2	P14416	Agonist
						ADRA2A	P08913	Partial agonist
						DRD1	P21728	Agonist
						DRD5	P21918	Agonist
						HTR1A	P08908	Agonist
						HTR1F	P30939	Agonist
						HTR2C	P28335	Agonist
						HTR2B	P41595	Agonist
						ADRA2C	P18825	Unknown
					Frovatriptan	HTR1D	P28221	Agonist
						HTR1B	P28222	Agonist
					Valproic acid	ACADSB	P45954	Inhibitor
						OGDH	Q02218	Inhibitor
						ALDH5A1	P51649	Inhibitor
						PPARA	Q07869	Unknown
						PPARD	Q03181	Unknown
						PPARG	P37231	Unknown
						CDKN1A	P38936	Regulator
						HGF	P14210	Inhibitor
						ODC1	P11926	Downregulator
						CD274	Q9NZQ7	Downregulator
						HDAC1	Q13547	Inhibitor
						HDAC2	Q92769	Inhibitor
						HDAC3	O15379	Inhibitor
						HDAC4	P56524	Inhibitor
						HDAC5	Q9UQL6	Inhibitor
						HDAC6	Q9UBN7	Inhibitor
						HDAC7	Q8WUI4	Inhibitor
						HDAC8	Q9BY41	Inhibitor
						HDAC9	Q9UKV0	Inhibitor
						HDAC10	Q969S8	Inhibitor
						HDAC11	Q96DB2	Inhibitor
						SCN1A	P35498	Inhibitor
						SCN2A	Q99250	Inhibitor
						SCN3A	Q9NY46	Inhibitor
						SCN4A	P35499	Inhibitor
						SCN5A	Q14524	Inhibitor
						SCN7A	Q01118	Inhibitor
						SCN8A	Q9UQD0	Inhibitor
						SCN9A	Q15858	Inhibitor
						SCN10A	Q9Y5Y9	Inhibitor
						SCN11A	Q9UI33	Inhibitor
						SCN1B	Q07699	Inhibitor
						SCN2B	O60939	Inhibitor
						SCN3B	Q9NY72	Inhibitor
						SCN4B	Q8IWT1	Inhibitor
						MTNR1A	P48039	Agonist
						MTNR1B	P49286	Agonist
					Melatonin	ESR1	P03372	Antagonist
						RORB	Q92753	Agonist
						CALM1	P0DP23	Unknown
						MPO	P05164	Inhibitor
						EPX	P11678	Inhibitor
						CALR	P27797	Unknown
						ASMT	P46597	Unknown
						NQO2	P16083	Unknown
					aEuropean Academy of Neurology guidelines on the treatment of cluster headache
