# Supplementary material for: Uncovering drug targets for cluster headache through proteome-wide Mendelian randomization analysis
Source: Springer Nature journal article supplement (doi:10.1186/s10194-025-01999-0), 2025-03-20
Supplement: MOESM8 [file 10194_2025_1999_MOESM8_ESM.xlsx]

## Sheet: Table S6
Table S6. The MR results between Cluster headache related proteins and Cortical Thickness and Surface Area.
Outcome (Cortical Thickness and Surface Area)	Exposure (Plasma protein)	method	nsnp	b	se	pval	FDR
posteriorcingulate_surfavg	CCN4	IVW	3	-1.2776	7.05959	0.856388	0.978725
	CFHR4	IVW	4	-1.21909	0.369073	0.000956127	0.00860514
	LGALS9	IVW	4	2.26574	1.48659	0.127478	0.458919
	MRC1	IVW	3	-15.291	8.06887	0.0580842	0.308073
	PKD1	IVW	2	-1.31176	7.53078	0.861719	0.978725
	PXDNL	IVW	4	3.69904	2.72184	0.17414	0.52242
supramarginal_surfavg	CCN4	IVW	3	8.0313	21.2827	0.705904	0.978725
	CFHR4	IVW	4	2.48323	4.99561	0.619131	0.978725
	LGALS9	IVW	4	4.56469	5.69802	0.423074	0.87063
	MRC1	IVW	3	-8.57063	27.0505	0.751366	0.978725
	PKD1	IVW	2	2.02921	21.3705	0.924352	0.978725
	PXDNL	IVW	4	16.4386	4.69517	0.000463211	0.0083378
isthmuscingulate_thickavg	CCN4	IVW	3	-0.00497046	0.0125055	0.691027	0.978725
	CFHR4	IVW	4	0.000183152	0.00182988	0.920273	0.978725
	LGALS9	IVW	4	-0.00332006	0.00182225	0.0684608	0.308073
	MRC1	IVW	3	0.0142961	0.012177	0.240383	0.618129
	PKD1	IVW	2	0.00892129	0.0114357	0.435315	0.87063
	PXDNL	IVW	3	0.000120255	0.00514535	0.981354	0.981354
