# Supplementary material for: Uncovering drug targets for cluster headache through proteome-wide Mendelian randomization analysis
Source: Springer Nature journal article supplement (doi:10.1186/s10194-025-01999-0), 2025-03-20
Supplement: MOESM9 [file 10194_2025_1999_MOESM9_ESM.xlsx]

## Sheet: Sheet1
Table S7. Pleiotropy and heterogeneity test of plasma protein instrumental variables (IVs) in Cluster headache.
		Heterogeneity				Pleiotropy_Egger			Pleiotropy_Global
	Gene	method	Q	Q_df	Q_pval	egger_intercept	se	pval	RSSobs	pval
Protein-Cluster headache	ANGPTL3	Inverse variance weighted	1.118	3	0.77273	-0.016074	0.0369138	0.705727	4.55324	0.735
	CCN4	Inverse variance weighted	0.394602	3	0.941355	-0.000403001	0.0565568	0.994962	0.677292	0.952
	CFHR4	Inverse variance weighted	3.40758	3	0.332947	0.0138768	0.0932407	0.895341	11.9127	0.497
	IDO1	Inverse variance weighted	0.342946	3	0.951759	0.00114228	0.0415379	0.980558	0.79028	0.942
	IGSF21	Inverse variance weighted	0.223891	3	0.973643	-0.00997298	0.0467334	0.850791	0.300171	0.985
	LGALS9	Inverse variance weighted	0.129182	3	0.988119	0.00208099	0.0341383	0.956937	0.21548	0.991
	MRC1	Inverse variance weighted	1.03465	3	0.79287	0.077058	0.0926639	0.493118	1.36046	0.843
	PBLD	Inverse variance weighted	0.415523	4	0.981186	-0.00182561	0.0621555	0.978413	0.698998	0.972
	PKD1	Inverse variance weighted	0.925961	3	0.819159	-0.0148298	0.0800581	0.870127	1.2677	0.866
	PXDNL	Inverse variance weighted	0.299275	3	0.960165	0.0135542	0.0651766	0.854514	0.508089	0.975
	SIGLEC8	Inverse variance weighted	0.865221	4	0.929496	0.0180883	0.027143	0.552819	2.55279	0.858
