# Supplementary material for: Uncovering drug targets for cluster headache through proteome-wide Mendelian randomization analysis
Source: Springer Nature journal article supplement (doi:10.1186/s10194-025-01999-0), 2025-03-20
Supplement: MOESM10 [file 10194_2025_1999_MOESM10_ESM.xlsx]

## Sheet: Sheet1
Table S8. Reverse associations of genetic liability to Cluster headache with identified proteins.
		Reverse_MR
	Gene	snp_r2.exposure	snp_r2.outcome	correct_causal_direction	steiger_pval
Protein-Cluster headache	ANGPTL3	0.0299938	0.000435665	TRUE	1.2777e-72
	CCN4	0.045048	0.000155019	TRUE	5.64972e-127
	CFHR4	0.0647527	0.00122961	TRUE	9.26701e-138
	IDO1	0.033952	0.000104326	TRUE	1.18379e-101
	IGSF21	0.0172581	8.96918e-05	TRUE	1.04692e-49
	LGALS9	0.0414716	7.17258e-05	TRUE	9.83804e-128
	MRC1	0.0356995	0.000326016	TRUE	1.60653e-80
	PBLD	0.0583071	0.000179525	TRUE	1.10925e-166
	PKD1	0.0346258	0.000369384	TRUE	4.58002e-84
	PXDNL	0.0321254	0.000109354	TRUE	1.09103e-88
	SIGLEC8	0.0563876	0.000215853	TRUE	5.18324e-165
